# Supplementary material for: Semiautomated glycoproteomics data analysis workflow for maximized glycopeptide identification and reliable quantification
Source: Beilstein J Org Chem. 2020 Dec 11;16:3038–51. doi: 10.3762/bjoc.16.253 (PMC7736696; doi:10.3762/bjoc.16.253)
Supplement: File 1 — Supporting tables. [file Beilstein_J_Org_Chem-16-3038-s001.xlsx]

## Sheet: Table S1 A
Query #:z	Protein Rank	Peptide < ProteinMetrics Confidential >	Glycans NHFAGNa	Modification Type(s)	Observed m/z	z	Observed (M+H)	Calc. mass (M+H)	Off-by-x error	Mass error (ppm)	Starting position	Cleavage	Score	Delta	Delta Mod	|Log Prob|	# of unique peptides	Protein Name	Protein DB number	Comment	Scan #	Scan Time
06151:4	1	R.LESEETM[+15.995]VLEAHDAQGDVPVTVTVHDFPGK.K		M[+16]	817.394	4	3266.55	3266.55	0	0.6	36	Specific	434.51	434.51	434.51	10.49	55	>sp|P01024|CO3_HUMAN Complement C3 OS=Homo sapiens GN=C3 PE=1 SV=2	3544	File384_Scan8320	controllerType=0 controllerNumber=1 scan=8320	28.465
00998:2	1	K.KLVLSSEK.T			452.279	2	903.551	903.551	0	-0.1	66	Specific	157.27	64.74	64.74	0.66	55	>sp|P01024|CO3_HUMAN Complement C3 OS=Homo sapiens GN=C3 PE=1 SV=2	3544	File384_Scan2697	controllerType=0 controllerNumber=1 scan=2697	15.5599
04823:3	1	K.TVLTPATNHM[+15.995]GN[+1378.476]VTFTIPANR.E	HexNAc(2)Hex(6)	M[+16], N[+1378]	1217.22	3	3649.63	3649.63	0	0.6	74	Specific	402.73	299.55	299.55	8.81	55	>sp|P01024|CO3_HUMAN Complement C3 OS=Homo sapiens GN=C3 PE=1 SV=2	3544	File384_Scan6920	controllerType=0 controllerNumber=1 scan=6920	25.1323
04825:3	1	K.TVLTPATNHM[+15.995]GN[+1378.476]VTFTIPANR.E	HexNAc(2)Hex(6)	M[+16], N[+1378]	1217.22	3	3649.63	3649.63	0	0.6	74	Specific	465.49	263.68	263.68	8.89	55	>sp|P01024|CO3_HUMAN Complement C3 OS=Homo sapiens GN=C3 PE=1 SV=2	3544	File384_Scan6922	controllerType=0 controllerNumber=1 scan=6922	25.1363
06795:2	1	K.FVTVQATFGTQVVEK.V			827.446	2	1653.88	1653.88	0	0	105	Specific	598	529.12	529.12	11.18	55	>sp|P01024|CO3_HUMAN Complement C3 OS=Homo sapiens GN=C3 PE=1 SV=2	3544	File384_Scan8994	controllerType=0 controllerNumber=1 scan=8994	29.8651
05758:2	1	K.TIYTPGSTVLYR.I			685.87	2	1370.73	1370.73	0	1.3	137	Specific	492.78	321.04	321.04	8.6	55	>sp|P01024|CO3_HUMAN Complement C3 OS=Homo sapiens GN=C3 PE=1 SV=2	3544	File384_Scan7908	controllerType=0 controllerNumber=1 scan=7908	27.5132
05760:2	1	K.TIYTPGSTVLYR.I			685.87	2	1370.73	1370.73	0	1.3	137	Specific	633.11	387.42	387.42	12.75	55	>sp|P01024|CO3_HUMAN Complement C3 OS=Homo sapiens GN=C3 PE=1 SV=2	3544	File384_Scan7910	controllerType=0 controllerNumber=1 scan=7910	27.5171
01210:2	1	R.IFTVNHK.L			429.745	2	858.483	858.483	0	-0.1	149	Specific	324.57	42.84	42.84	1.81	55	>sp|P01024|CO3_HUMAN Complement C3 OS=Homo sapiens GN=C3 PE=1 SV=2	3544	File384_Scan2919	controllerType=0 controllerNumber=1 scan=2919	16.0437
05998:2	1	R.TVM[+15.995]VNIENPEGIPVK.Q		M[+16]	828.438	2	1655.87	1655.87	0	0.6	162	Specific	588.86	384.92	384.92	11.4	55	>sp|P01024|CO3_HUMAN Complement C3 OS=Homo sapiens GN=C3 PE=1 SV=2	3544	File384_Scan8160	controllerType=0 controllerNumber=1 scan=8160	28.1062
08195:3	1	R.AYYENSPQQVFSTEFEVK.E			722.673	3	2166	2166	0	0.9	208	Specific	105.09	105.09	105.09	2.75	55	>sp|P01024|CO3_HUMAN Complement C3 OS=Homo sapiens GN=C3 PE=1 SV=2	3544	File384_Scan10464	controllerType=0 controllerNumber=1 scan=10464	32.8945
08162:2	1	R.AYYENSPQQVFSTEFEVK.E			1083.5	2	2166	2166	0	-0.3	208	Specific	589.2	492.83	492.83	12	55	>sp|P01024|CO3_HUMAN Complement C3 OS=Homo sapiens GN=C3 PE=1 SV=2	3544	File384_Scan10430	controllerType=0 controllerNumber=1 scan=10430	32.8263
05193:2	1	K.FYYIYNEK.G			570.274	2	1139.54	1139.54	0	0.8	242	Specific	332.78	223.45	223.45	4.84	55	>sp|P01024|CO3_HUMAN Complement C3 OS=Homo sapiens GN=C3 PE=1 SV=2	3544	File384_Scan7304	controllerType=0 controllerNumber=1 scan=7304	26.0786
04654:2	1	K.GLEVTITAR.F			480.28	2	959.553	959.552	0	1.6	250	Specific	264.82	180.16	180.16	5.11	55	>sp|P01024|CO3_HUMAN Complement C3 OS=Homo sapiens GN=C3 PE=1 SV=2	3544	File384_Scan6740	controllerType=0 controllerNumber=1 scan=6740	24.6619
08377:3	1	K.KVEGTAFVIFGIQDGEQR.I			665.35	3	1994.04	1994.03	0	1.2	264	Specific	420.53	420.53	420.53	10.45	55	>sp|P01024|CO3_HUMAN Complement C3 OS=Homo sapiens GN=C3 PE=1 SV=2	3544	File384_Scan10655	controllerType=0 controllerNumber=1 scan=10655	33.2708
10126:2	1	K.VEGTAFVIFGIQDGEQR.I			933.475	2	1865.94	1865.94	0	1.8	265	Specific	222.26	222.26	222.26	6.23	55	>sp|P01024|CO3_HUMAN Complement C3 OS=Homo sapiens GN=C3 PE=1 SV=2	3544	File384_Scan12507	controllerType=0 controllerNumber=1 scan=12507	37.1317
05297:2	1	R.ISLPESLK.R			443.766	2	886.525	886.524	0	0.2	282	Specific	460.47	58.07	58.07	4.51	55	>sp|P01024|CO3_HUMAN Complement C3 OS=Homo sapiens GN=C3 PE=1 SV=2	3544	File384_Scan7412	controllerType=0 controllerNumber=1 scan=7412	26.3415
05405:2	1	R.IPIEDGSGEVVLSR.K			735.894	2	1470.78	1470.78	0	0.8	291	Specific	592.65	417.48	417.48	11.42	55	>sp|P01024|CO3_HUMAN Complement C3 OS=Homo sapiens GN=C3 PE=1 SV=2	3544	File384_Scan7525	controllerType=0 controllerNumber=1 scan=7525	26.6003
04118:2	1	K.VLLDGVQNPR.A			555.817	2	1110.63	1110.63	0	0.4	306	Specific	497.07	200.26	200.26	7.7	55	>sp|P01024|CO3_HUMAN Complement C3 OS=Homo sapiens GN=C3 PE=1 SV=2	3544	File384_Scan6078	controllerType=0 controllerNumber=1 scan=6078	23.0402
07714:3	1	R.SGIPIVTSPYQIHFTK.T			596.661	3	1787.97	1787.97	0	0.1	344	Specific	660.09	600.6	600.6	13.67	55	>sp|P01024|CO3_HUMAN Complement C3 OS=Homo sapiens GN=C3 PE=1 SV=2	3544	File384_Scan9960	controllerType=0 controllerNumber=1 scan=9960	31.8582
06179:3	1	R.VPVAVQGEDTVQSLTQGDGVAK.L			733.382	3	2198.13	2198.13	0	0.6	387	Specific	697.41	628.6	628.6	14.41	55	>sp|P01024|CO3_HUMAN Complement C3 OS=Homo sapiens GN=C3 PE=1 SV=2	3544	File384_Scan8349	controllerType=0 controllerNumber=1 scan=8349	28.5212
06172:2	1	R.VPVAVQGEDTVQSLTQGDGVAK.L			1099.57	2	2198.13	2198.13	0	1	387	Specific	801.03	746.92	746.92	17.33	55	>sp|P01024|CO3_HUMAN Complement C3 OS=Homo sapiens GN=C3 PE=1 SV=2	3544	File384_Scan8342	controllerType=0 controllerNumber=1 scan=8342	28.5104
04167:4	1	K.LSINTHPSQKPLSITVR.T			473.525	4	1891.08	1891.08	0	0.6	409	Specific	539.44	509.99	509.99	10.23	55	>sp|P01024|CO3_HUMAN Complement C3 OS=Homo sapiens GN=C3 PE=1 SV=2	3544	File384_Scan6140	controllerType=0 controllerNumber=1 scan=6140	23.1885
00646:2	1	K.KQELSEAEQATR.T			695.352	2	1389.7	1389.7	0	0.4	428	Specific	175.27	33.79	33.79	1.63	55	>sp|P01024|CO3_HUMAN Complement C3 OS=Homo sapiens GN=C3 PE=1 SV=2	3544	File384_Scan2329	controllerType=0 controllerNumber=1 scan=2329	14.7562
01102:2	1	K.QELSEAEQATR.T			631.305	2	1261.6	1261.6	0	0.7	429	Specific	471.31	287.61	287.61	8.02	55	>sp|P01024|CO3_HUMAN Complement C3 OS=Homo sapiens GN=C3 PE=1 SV=2	3544	File384_Scan2806	controllerType=0 controllerNumber=1 scan=2806	15.8001
08847:3	1	R.TELRPGETLNVNFLLR.M			624.683	3	1872.03	1872.03	0	-0.1	463	Specific	636.27	558.27	558.27	12.45	55	>sp|P01024|CO3_HUMAN Complement C3 OS=Homo sapiens GN=C3 PE=1 SV=2	3544	File384_Scan11159	controllerType=0 controllerNumber=1 scan=11159	34.2772
07839:2	1	R.LVAYYTLIGASGQR.E			756.415	2	1511.82	1511.82	0	0.9	531	Specific	573.6	393.93	393.93	10.31	55	>sp|P01024|CO3_HUMAN Complement C3 OS=Homo sapiens GN=C3 PE=1 SV=2	3544	File384_Scan10091	controllerType=0 controllerNumber=1 scan=10091	32.1252
01004:3	1	K.SGQSEDRQPVPGQQM[+15.995]TLK.I		M[+16]	667.994	3	2001.97	2001.97	0	0.8	567	Specific	261.28	261.28	261.28	6.41	55	>sp|P01024|CO3_HUMAN Complement C3 OS=Homo sapiens GN=C3 PE=1 SV=2	3544	File384_Scan2704	controllerType=0 controllerNumber=1 scan=2704	15.5797
01348:2	1	R.QPVPGQQM[+15.995]TLK.I		M[+16]	621.829	2	1242.65	1242.65	0	0.1	574	Specific	382.07	238.62	238.62	5.85	55	>sp|P01024|CO3_HUMAN Complement C3 OS=Homo sapiens GN=C3 PE=1 SV=2	3544	File384_Scan3064	controllerType=0 controllerNumber=1 scan=3064	16.333
04278:2	1	R.VVLVAVDK.G			421.771	2	842.535	842.535	0	0.3	593	Specific	249.61	158.67	158.67	4.42	55	>sp|P01024|CO3_HUMAN Complement C3 OS=Homo sapiens GN=C3 PE=1 SV=2	3544	File384_Scan6297	controllerType=0 controllerNumber=1 scan=6297	23.5762
08713:2	1	K.DYAGVFSDAGLTFTSSSGQQTAQR.A			1247.58	2	2494.15	2494.15	0	-0.5	634	Specific	515.6	515.6	515.6	10.25	55	>sp|P01024|CO3_HUMAN Complement C3 OS=Homo sapiens GN=C3 PE=1 SV=2	3544	File384_Scan11015	controllerType=0 controllerNumber=1 scan=11015	33.9856
08700:3	1	K.DYAGVFSDAGLTFTSSSGQQTAQR.A			832.054	3	2494.15	2494.15	0	-0.8	634	Specific	618.32	577.13	577.13	12.84	55	>sp|P01024|CO3_HUMAN Complement C3 OS=Homo sapiens GN=C3 PE=1 SV=2	3544	File384_Scan11001	controllerType=0 controllerNumber=1 scan=11001	33.956
01045:2	1	R.SVQLTEK.R			402.727	2	804.446	804.446	0	-0.2	672	Specific	322.51	131.06	131.06	3.53	55	>sp|P01024|CO3_HUMAN Complement C3 OS=Homo sapiens GN=C3 PE=1 SV=2	3544	File384_Scan2747	controllerType=0 controllerNumber=1 scan=2747	15.6712
04678:2	1	R.FISLGEAC[+57.021]K.K		C[+57]	512.76	2	1024.51	1024.51	0	-1.3	713	Specific	406.94	197.03	197.03	5.99	55	>sp|P01024|CO3_HUMAN Complement C3 OS=Homo sapiens GN=C3 PE=1 SV=2	3544	File384_Scan6769	controllerType=0 controllerNumber=1 scan=6769	24.7297
00949:2	1	R.ASHLGLAR.S			412.74	2	824.474	824.474	0	0	741	Specific	297.99	38.02	38.02	1.81	55	>sp|P01024|CO3_HUMAN Complement C3 OS=Homo sapiens GN=C3 PE=1 SV=2	3544	File384_Scan2646	controllerType=0 controllerNumber=1 scan=2646	15.4517
07699:3	1	R.SNLDEDIIAEENIVSR.S			606.303	3	1816.89	1816.89	0	1.3	749	Specific	464.08	433.79	433.79	10.19	55	>sp|P01024|CO3_HUMAN Complement C3 OS=Homo sapiens GN=C3 PE=1 SV=2	3544	File384_Scan9944	controllerType=0 controllerNumber=1 scan=9944	31.8257
07674:2	1	R.SNLDEDIIAEENIVSR.S			908.951	2	1816.9	1816.89	0	1.7	749	Specific	756.54	716.93	716.93	15.81	55	>sp|P01024|CO3_HUMAN Complement C3 OS=Homo sapiens GN=C3 PE=1 SV=2	3544	File384_Scan9918	controllerType=0 controllerNumber=1 scan=9918	31.7746
06290:2	1	K.LM[+15.995]NIFLK.D		M[+16]	447.76	2	894.512	894.512	0	-0.1	790	Specific	403.31	107.58	107.58	5.38	55	>sp|P01024|CO3_HUMAN Complement C3 OS=Homo sapiens GN=C3 PE=1 SV=2	3544	File384_Scan8465	controllerType=0 controllerNumber=1 scan=8465	28.7766
04022:2	1	R.LPYSVVR.N			417.248	2	833.488	833.488	0	-0.3	835	Specific	230.65	72.21	72.21	2.23	55	>sp|P01024|CO3_HUMAN Complement C3 OS=Homo sapiens GN=C3 PE=1 SV=2	3544	File384_Scan5947	controllerType=0 controllerNumber=1 scan=5947	22.6993
01268:2	1	R.NEQVEIR.A			444.233	2	887.458	887.458	0	0.1	842	Specific	418	74.73	74.73	4.58	55	>sp|P01024|CO3_HUMAN Complement C3 OS=Homo sapiens GN=C3 PE=1 SV=2	3544	File384_Scan2980	controllerType=0 controllerNumber=1 scan=2980	16.1635
03323:2	1	R.AVLYNYR.Q			449.743	2	898.479	898.478	0	0.7	849	Specific	339.2	87.19	87.19	2.91	55	>sp|P01024|CO3_HUMAN Complement C3 OS=Homo sapiens GN=C3 PE=1 SV=2	3544	File384_Scan5132	controllerType=0 controllerNumber=1 scan=5132	20.8668
01402:2	1	R.HQQTVTIPPK.S			574.825	2	1148.64	1148.64	0	0.6	882	Specific	444.08	312.49	312.49	7.46	55	>sp|P01024|CO3_HUMAN Complement C3 OS=Homo sapiens GN=C3 PE=1 SV=2	3544	File384_Scan3120	controllerType=0 controllerNumber=1 scan=3120	16.4427
10163:2	1	K.SSLSVPYVIVPLK.T			701.422	2	1401.84	1401.84	0	0.6	892	Specific	556.44	471.14	471.14	10.14	55	>sp|P01024|CO3_HUMAN Complement C3 OS=Homo sapiens GN=C3 PE=1 SV=2	3544	File384_Scan12548	controllerType=0 controllerNumber=1 scan=12548	37.22
03056:2	1	K.TGLQEVEVK.A			501.777	2	1002.55	1002.55	0	0.4	905	Specific	606.75	290.71	290.71	10.78	55	>sp|P01024|CO3_HUMAN Complement C3 OS=Homo sapiens GN=C3 PE=1 SV=2	3544	File384_Scan4853	controllerType=0 controllerNumber=1 scan=4853	20.2726
04675:3	1	R.EGVQKEDIPPADLSDQVPDTESETR.I			919.102	3	2755.29	2755.29	0	0.9	955	Specific	365.8	365.8	365.8	8.09	55	>sp|P01024|CO3_HUMAN Complement C3 OS=Homo sapiens GN=C3 PE=1 SV=2	3544	File384_Scan6765	controllerType=0 controllerNumber=1 scan=6765	24.718
04676:3	1	R.EGVQKEDIPPADLSDQVPDTESETR.I			919.102	3	2755.29	2755.29	0	0.9	955	Specific	559.04	485.44	485.44	9.11	55	>sp|P01024|CO3_HUMAN Complement C3 OS=Homo sapiens GN=C3 PE=1 SV=2	3544	File384_Scan6767	controllerType=0 controllerNumber=1 scan=6767	24.7242
04483:3	1	R.EGVQKEDIPPADLSDQVPDTESETR.I			919.103	3	2755.3	2755.29	0	1.8	955	Specific	565.06	565.06	565.06	10.31	55	>sp|P01024|CO3_HUMAN Complement C3 OS=Homo sapiens GN=C3 PE=1 SV=2	3544	File384_Scan6548	controllerType=0 controllerNumber=1 scan=6548	24.2087
04484:3	1	R.EGVQKEDIPPADLSDQVPDTESETR.I			919.103	3	2755.3	2755.29	0	1.8	955	Specific	810.23	778.95	778.95	16.42	55	>sp|P01024|CO3_HUMAN Complement C3 OS=Homo sapiens GN=C3 PE=1 SV=2	3544	File384_Scan6550	controllerType=0 controllerNumber=1 scan=6550	24.2158
06518:2	1	R.ILLQGTPVAQM[+15.995]TEDAVDAER.L		M[+16]	1087.05	2	2173.08	2173.08	0	1.2	980	Specific	491.37	411.13	411.13	10.75	55	>sp|P01024|CO3_HUMAN Complement C3 OS=Homo sapiens GN=C3 PE=1 SV=2	3544	File384_Scan8704	controllerType=0 controllerNumber=1 scan=8704	29.2823
06522:3	1	R.ILLQGTPVAQM[+15.995]TEDAVDAER.L		M[+16]	725.032	3	2173.08	2173.08	0	0.7	980	Specific	716.95	674.45	674.45	15.35	55	>sp|P01024|CO3_HUMAN Complement C3 OS=Homo sapiens GN=C3 PE=1 SV=2	3544	File384_Scan8708	controllerType=0 controllerNumber=1 scan=8708	29.2885
05211:2	1	R.QGALELIK.K			436.266	2	871.525	871.525	0	0.1	1043	Specific	412.96	55.73	55.73	4.88	55	>sp|P01024|CO3_HUMAN Complement C3 OS=Homo sapiens GN=C3 PE=1 SV=2	3544	File384_Scan7323	controllerType=0 controllerNumber=1 scan=7323	26.1284
06711:2	1	R.QPSSAFAAFVK.R			576.806	2	1152.6	1152.6	0	-0.6	1061	Specific	603.71	383.2	383.2	12.2	55	>sp|P01024|CO3_HUMAN Complement C3 OS=Homo sapiens GN=C3 PE=1 SV=2	3544	File384_Scan8906	controllerType=0 controllerNumber=1 scan=8906	29.6914
05345:4	1	K.QKPDGVFQEDAPVIHQEM[+15.995]IGGLR.N		M[+16]	645.828	4	2580.29	2580.29	0	0.5	1112	Specific	647.98	634.76	634.76	12.97	55	>sp|P01024|CO3_HUMAN Complement C3 OS=Homo sapiens GN=C3 PE=1 SV=2	3544	File384_Scan7463	controllerType=0 controllerNumber=1 scan=7463	26.4602
06072:2	1	K.AGDFLEANYM[+15.995]NLQR.S		M[+16]	829.387	2	1657.77	1657.76	0	1.4	1172	Specific	480.04	380.23	380.23	9.9	55	>sp|P01024|CO3_HUMAN Complement C3 OS=Homo sapiens GN=C3 PE=1 SV=2	3544	File384_Scan8237	controllerType=0 controllerNumber=1 scan=8237	28.2836
07513:2	1	R.SYTVAIAGYALAQM[+15.995]GR.L		M[+16]	844.428	2	1687.85	1687.85	0	1.5	1186	Specific	348.81	308.77	308.77	6.48	55	>sp|P01024|CO3_HUMAN Complement C3 OS=Homo sapiens GN=C3 PE=1 SV=2	3544	File384_Scan9749	controllerType=0 controllerNumber=1 scan=9749	31.4335
01943:2	1	R.LKGPLLNK.F			441.792	2	882.577	882.577	0	0	1202	Specific	363.95	156.7	156.7	4.42	55	>sp|P01024|CO3_HUMAN Complement C3 OS=Homo sapiens GN=C3 PE=1 SV=2	3544	File384_Scan3690	controllerType=0 controllerNumber=1 scan=3690	17.6054
09967:2	1	K.DFDFVPPVVR.W			595.814	2	1190.62	1190.62	0	1.1	1245	Specific	420.5	124.8	124.8	6.87	55	>sp|P01024|CO3_HUMAN Complement C3 OS=Homo sapiens GN=C3 PE=1 SV=2	3544	File384_Scan12340	controllerType=0 controllerNumber=1 scan=12340	36.7876
09857:2	1	K.DFDFVPPVVR.W			595.814	2	1190.62	1190.62	0	0.6	1245	Specific	506.06	175.61	175.61	7.93	55	>sp|P01024|CO3_HUMAN Complement C3 OS=Homo sapiens GN=C3 PE=1 SV=2	3544	File384_Scan12225	controllerType=0 controllerNumber=1 scan=12225	36.5398
01944:3	1	R.SEETKENEGFTVTAEGK.G			619.29	3	1855.86	1855.86	0	0	1321	Specific	173.81	150.7	150.7	1.79	55	>sp|P01024|CO3_HUMAN Complement C3 OS=Homo sapiens GN=C3 PE=1 SV=2	3544	File384_Scan3691	controllerType=0 controllerNumber=1 scan=3691	17.6069
01818:3	1	R.SEETKENEGFTVTAEGK.G			619.291	3	1855.86	1855.86	0	1.5	1321	Specific	712.68	593.78	593.78	14.15	55	>sp|P01024|CO3_HUMAN Complement C3 OS=Homo sapiens GN=C3 PE=1 SV=2	3544	File384_Scan3559	controllerType=0 controllerNumber=1 scan=3559	17.3344
03559:3	1	K.GQGTLSVVTM[+15.995]YHAK.A		M[+16]	503.257	3	1507.76	1507.76	0	0.1	1338	Specific	308.6	275.87	275.87	6.2	55	>sp|P01024|CO3_HUMAN Complement C3 OS=Homo sapiens GN=C3 PE=1 SV=2	3544	File384_Scan5383	controllerType=0 controllerNumber=1 scan=5383	21.4241
00925:2	1	K.VTIKPAPETEK.R			606.846	2	1212.68	1212.68	0	0.5	1365	Specific	257.09	231.79	231.79	4.94	55	>sp|P01024|CO3_HUMAN Complement C3 OS=Homo sapiens GN=C3 PE=1 SV=2	3544	File384_Scan2621	controllerType=0 controllerNumber=1 scan=2621	15.3933
00914:3	1	K.VTIKPAPETEK.R			404.899	3	1212.68	1212.68	0	-0.3	1365	Specific	419.36	263.53	263.53	6.88	55	>sp|P01024|CO3_HUMAN Complement C3 OS=Homo sapiens GN=C3 PE=1 SV=2	3544	File384_Scan2610	controllerType=0 controllerNumber=1 scan=2610	15.3721
07514:2	1	R.NTLIIYLDK.V			546.819	2	1092.63	1092.63	0	0.8	1442	Specific	533.29	266.67	266.67	8.37	55	>sp|P01024|CO3_HUMAN Complement C3 OS=Homo sapiens GN=C3 PE=1 SV=2	3544	File384_Scan9750	controllerType=0 controllerNumber=1 scan=9750	31.435
07161:3	1	K.VHQYFNVELIQPGAVK.V			614.668	3	1841.99	1841.99	0	-0.7	1463	Specific	634.19	426.86	426.86	12.45	55	>sp|P01024|CO3_HUMAN Complement C3 OS=Homo sapiens GN=C3 PE=1 SV=2	3544	File384_Scan9378	controllerType=0 controllerNumber=1 scan=9378	30.6671
01020:2	1	K.SDDKVTLEER.L			596.296	2	1191.59	1191.59	0	0.3	1523	Specific	429.05	243.76	243.76	5.53	55	>sp|P01024|CO3_HUMAN Complement C3 OS=Homo sapiens GN=C3 PE=1 SV=2	3544	File384_Scan2720	controllerType=0 controllerNumber=1 scan=2720	15.6112
00809:2	1	K.SGSDEVQVGQQR.T			645.308	2	1289.61	1289.61	0	0.4	1571	Specific	715.1	620.08	620.08	14.61	55	>sp|P01024|CO3_HUMAN Complement C3 OS=Homo sapiens GN=C3 PE=1 SV=2	3544	File384_Scan2500	controllerType=0 controllerNumber=1 scan=2500	15.1479
04979:2	1	R.TFISPIK.C			403.245	2	805.482	805.482	0	0.4	1583	Specific	368.48	236.06	236.06	5.69	55	>sp|P01024|CO3_HUMAN Complement C3 OS=Homo sapiens GN=C3 PE=1 SV=2	3544	File384_Scan7082	controllerType=0 controllerNumber=1 scan=7082	25.5254
01284:2	1	R.EALKLEEK.K			480.274	2	959.541	959.541	0	0.2	1592	Specific	734.7	224.46	224.46	11.01	55	>sp|P01024|CO3_HUMAN Complement C3 OS=Homo sapiens GN=C3 PE=1 SV=2	3544	File384_Scan2997	controllerType=0 controllerNumber=1 scan=2997	16.2002
02993:3	2	R.FKDLGEENFK.A			409.54	3	1226.6	1226.61	0	-0.3	35	Specific	279.82	177.85	177.85	3.58	38	>sp|P02768|ALBU_HUMAN Serum albumin OS=Homo sapiens GN=ALB PE=1 SV=2	749	File384_Scan4787	controllerType=0 controllerNumber=1 scan=4787	20.1226
03674:3	2	R.FKDLGEENFK.A			409.539	3	1226.6	1226.61	0	-1.2	35	Specific	347.24	204.43	204.43	4.79	38	>sp|P02768|ALBU_HUMAN Serum albumin OS=Homo sapiens GN=ALB PE=1 SV=2	749	File384_Scan5509	controllerType=0 controllerNumber=1 scan=5509	21.6821
03522:3	2	R.FKDLGEENFK.A			409.54	3	1226.61	1226.61	0	-0.1	35	Specific	368.73	166.37	166.37	5.06	38	>sp|P02768|ALBU_HUMAN Serum albumin OS=Homo sapiens GN=ALB PE=1 SV=2	749	File384_Scan5344	controllerType=0 controllerNumber=1 scan=5344	21.3358
03412:3	2	R.FKDLGEENFK.A			409.54	3	1226.61	1226.61	0	0.2	35	Specific	469.95	297.03	297.03	6.24	38	>sp|P02768|ALBU_HUMAN Serum albumin OS=Homo sapiens GN=ALB PE=1 SV=2	749	File384_Scan5225	controllerType=0 controllerNumber=1 scan=5225	21.0663
03294:3	2	R.FKDLGEENFK.A			409.54	3	1226.61	1226.61	0	0.5	35	Specific	511.25	295.68	295.68	6.8	38	>sp|P02768|ALBU_HUMAN Serum albumin OS=Homo sapiens GN=ALB PE=1 SV=2	749	File384_Scan5102	controllerType=0 controllerNumber=1 scan=5102	20.8106
03298:2	2	R.FKDLGEENFK.A			613.807	2	1226.61	1226.61	0	1.7	35	Specific	538.99	253.43	253.43	6.53	38	>sp|P02768|ALBU_HUMAN Serum albumin OS=Homo sapiens GN=ALB PE=1 SV=2	749	File384_Scan5106	controllerType=0 controllerNumber=1 scan=5106	20.8168
03096:3	2	R.FKDLGEENFK.A			409.54	3	1226.61	1226.61	0	0.3	35	Specific	586.5	339.85	339.85	8.64	38	>sp|P02768|ALBU_HUMAN Serum albumin OS=Homo sapiens GN=ALB PE=1 SV=2	749	File384_Scan4895	controllerType=0 controllerNumber=1 scan=4895	20.3629
03186:3	2	R.FKDLGEENFK.A			409.539	3	1226.6	1226.61	0	-1.4	35	Specific	593.51	349.49	349.49	8.9	38	>sp|P02768|ALBU_HUMAN Serum albumin OS=Homo sapiens GN=ALB PE=1 SV=2	749	File384_Scan4989	controllerType=0 controllerNumber=1 scan=4989	20.5732
03173:2	2	R.FKDLGEENFK.A			613.806	2	1226.6	1226.61	0	-0.3	35	Specific	594.97	286.23	286.23	7.65	38	>sp|P02768|ALBU_HUMAN Serum albumin OS=Homo sapiens GN=ALB PE=1 SV=2	749	File384_Scan4975	controllerType=0 controllerNumber=1 scan=4975	20.5452
03054:2	2	R.FKDLGEENFK.A			613.807	2	1226.61	1226.61	0	0.8	35	Specific	655.53	309.85	309.85	9.44	38	>sp|P02768|ALBU_HUMAN Serum albumin OS=Homo sapiens GN=ALB PE=1 SV=2	749	File384_Scan4851	controllerType=0 controllerNumber=1 scan=4851	20.2681
03117:2	2	K.DLGEENFK.A			476.225	2	951.442	951.442	0	0.5	37	Specific	220.72	81.17	81.17	2.24	38	>sp|P02768|ALBU_HUMAN Serum albumin OS=Homo sapiens GN=ALB PE=1 SV=2	749	File384_Scan4916	controllerType=0 controllerNumber=1 scan=4916	20.4067
02945:2	2	K.DLGEENFK.A			476.225	2	951.442	951.442	0	0.2	37	Specific	424.74	177.89	177.89	5.54	38	>sp|P02768|ALBU_HUMAN Serum albumin OS=Homo sapiens GN=ALB PE=1 SV=2	749	File384_Scan4737	controllerType=0 controllerNumber=1 scan=4737	20.0111
04948:2	2	K.LVNEVTEFAK.T			575.311	2	1149.62	1149.62	0	0.4	66	Specific	365.5	190.15	190.15	5.9	38	>sp|P02768|ALBU_HUMAN Serum albumin OS=Homo sapiens GN=ALB PE=1 SV=2	749	File384_Scan7050	controllerType=0 controllerNumber=1 scan=7050	25.4468
04848:2	2	K.LVNEVTEFAK.T			575.311	2	1149.62	1149.62	0	0.1	66	Specific	522.94	270.03	270.03	8.37	38	>sp|P02768|ALBU_HUMAN Serum albumin OS=Homo sapiens GN=ALB PE=1 SV=2	749	File384_Scan6946	controllerType=0 controllerNumber=1 scan=6946	25.1981
00518:2	2	K.TC[+57.021]VADESAENC[+57.021]DK.S		C[+57]*2	749.793	2	1498.58	1498.58	0	0.6	76	Specific	554.65	414.65	414.65	10.14	38	>sp|P02768|ALBU_HUMAN Serum albumin OS=Homo sapiens GN=ALB PE=1 SV=2	749	File384_Scan2197	controllerType=0 controllerNumber=1 scan=2197	14.4292
00520:2	2	K.TC[+57.021]VADESAENC[+57.021]DK.S		C[+57]*2	749.793	2	1498.58	1498.58	0	0.6	76	Specific	734.02	485.53	485.53	14.42	38	>sp|P02768|ALBU_HUMAN Serum albumin OS=Homo sapiens GN=ALB PE=1 SV=2	749	File384_Scan2199	controllerType=0 controllerNumber=1 scan=2199	14.4372
04242:2	2	K.SLHTLFGDK.L			509.272	2	1017.54	1017.54	0	0.3	89	Specific	723.68	274.51	274.51	11.56	38	>sp|P02768|ALBU_HUMAN Serum albumin OS=Homo sapiens GN=ALB PE=1 SV=2	749	File384_Scan6249	controllerType=0 controllerNumber=1 scan=6249	23.4617
04154:2	2	K.SLHTLFGDK.L			509.272	2	1017.54	1017.54	0	0.4	89	Specific	809.68	357.07	357.07	13.78	38	>sp|P02768|ALBU_HUMAN Serum albumin OS=Homo sapiens GN=ALB PE=1 SV=2	749	File384_Scan6126	controllerType=0 controllerNumber=1 scan=6126	23.1595
03533:2	2	K.LC[+57.021]TVATLR.E		C[+57]	467.263	2	933.519	933.519	0	0.2	98	Specific	403.88	117.55	117.55	4.98	38	>sp|P02768|ALBU_HUMAN Serum albumin OS=Homo sapiens GN=ALB PE=1 SV=2	749	File384_Scan5356	controllerType=0 controllerNumber=1 scan=5356	21.3627
00662:2	2	R.ETYGEM[+15.995]ADC[+57.021]C[+57.021]AK.Q		C[+57]*2, M[+16]	725.768	2	1450.53	1450.53	0	-0.1	106	Specific	546.44	546.44	546.44	10.11	38	>sp|P02768|ALBU_HUMAN Serum albumin OS=Homo sapiens GN=ALB PE=1 SV=2	749	File384_Scan2346	controllerType=0 controllerNumber=1 scan=2346	14.7925
01315:3	2	K.QEPERNEC[+57.021]FLQHK.D		C[+57]	572.272	3	1714.8	1714.8	0	3	118	Specific	201.65	107.6	107.6	0.69	38	>sp|P02768|ALBU_HUMAN Serum albumin OS=Homo sapiens GN=ALB PE=1 SV=2	749	File384_Scan3029	controllerType=0 controllerNumber=1 scan=3029	16.265
01191:3	2	K.QEPERNEC[+57.021]FLQHK.D		C[+57]	572.271	3	1714.8	1714.8	0	1.1	118	Specific	229.43	157.79	157.79	2.2	38	>sp|P02768|ALBU_HUMAN Serum albumin OS=Homo sapiens GN=ALB PE=1 SV=2	749	File384_Scan2899	controllerType=0 controllerNumber=1 scan=2899	15.998
01332:2	2	R.NEC[+57.021]FLQHK.D		C[+57]	538.253	2	1075.5	1075.5	0	-0.4	123	Specific	514.81	257.45	257.45	5.98	38	>sp|P02768|ALBU_HUMAN Serum albumin OS=Homo sapiens GN=ALB PE=1 SV=2	749	File384_Scan3047	controllerType=0 controllerNumber=1 scan=3047	16.2994
01590:2	2	K.DDNPNLPR.L			470.728	2	940.448	940.448	0	-0.1	131	Specific	311.34	190.55	190.55	4.82	38	>sp|P02768|ALBU_HUMAN Serum albumin OS=Homo sapiens GN=ALB PE=1 SV=2	749	File384_Scan3320	controllerType=0 controllerNumber=1 scan=3320	16.8466
01470:2	2	K.DDNPNLPR.L			470.727	2	940.447	940.448	0	-1.2	131	Specific	427.98	326.26	326.26	7.2	38	>sp|P02768|ALBU_HUMAN Serum albumin OS=Homo sapiens GN=ALB PE=1 SV=2	749	File384_Scan3192	controllerType=0 controllerNumber=1 scan=3192	16.5961
05994:3	2	R.LVRPEVDVM[+15.995]C[+57.021]TAFHDNEETFLK.K		C[+57], M[+16]	889.428	3	2666.27	2666.26	0	3.4	139	Specific	269.43	269.43	269.43	4.81	38	>sp|P02768|ALBU_HUMAN Serum albumin OS=Homo sapiens GN=ALB PE=1 SV=2	749	File384_Scan8155	controllerType=0 controllerNumber=1 scan=8155	28.0939
05934:4	2	R.LVRPEVDVM[+15.995]C[+57.021]TAFHDNEETFLK.K		C[+57], M[+16]	667.321	4	2666.26	2666.26	0	0.7	139	Specific	893.81	893.81	893.81	18.33	38	>sp|P02768|ALBU_HUMAN Serum albumin OS=Homo sapiens GN=ALB PE=1 SV=2	749	File384_Scan8093	controllerType=0 controllerNumber=1 scan=8093	27.9594
05223:4	2	R.LVRPEVDVM[+15.995]C[+57.021]TAFHDNEETFLKK.Y		C[+57], M[+16]	699.344	4	2794.35	2794.35	0	0.4	139	Specific	473.52	473.52	473.52	9.04	38	>sp|P02768|ALBU_HUMAN Serum albumin OS=Homo sapiens GN=ALB PE=1 SV=2	749	File384_Scan7335	controllerType=0 controllerNumber=1 scan=7335	26.1536
05320:5	2	R.LVRPEVDVM[+15.995]C[+57.021]TAFHDNEETFLKK.Y		C[+57], M[+16]	559.677	5	2794.35	2794.35	0	0.3	139	Specific	529.24	514.61	514.61	9.87	38	>sp|P02768|ALBU_HUMAN Serum albumin OS=Homo sapiens GN=ALB PE=1 SV=2	749	File384_Scan7436	controllerType=0 controllerNumber=1 scan=7436	26.3947
05118:4	2	R.LVRPEVDVM[+15.995]C[+57.021]TAFHDNEETFLKK.Y		C[+57], M[+16]	699.345	4	2794.36	2794.35	0	1.9	139	Specific	589.89	589.89	589.89	10.89	38	>sp|P02768|ALBU_HUMAN Serum albumin OS=Homo sapiens GN=ALB PE=1 SV=2	749	File384_Scan7226	controllerType=0 controllerNumber=1 scan=7226	25.8888
05212:5	2	R.LVRPEVDVM[+15.995]C[+57.021]TAFHDNEETFLKK.Y		C[+57], M[+16]	559.677	5	2794.36	2794.35	0	0.6	139	Specific	684.33	684.33	684.33	13.31	38	>sp|P02768|ALBU_HUMAN Serum albumin OS=Homo sapiens GN=ALB PE=1 SV=2	749	File384_Scan7324	controllerType=0 controllerNumber=1 scan=7324	26.13
05100:5	2	R.LVRPEVDVM[+15.995]C[+57.021]TAFHDNEETFLKK.Y		C[+57], M[+16]	559.677	5	2794.35	2794.35	0	0.3	139	Specific	807.99	807.99	807.99	16.31	38	>sp|P02768|ALBU_HUMAN Serum albumin OS=Homo sapiens GN=ALB PE=1 SV=2	749	File384_Scan7207	controllerType=0 controllerNumber=1 scan=7207	25.8344
04725:2	2	K.YLYEIAR.R			464.249	2	927.49	927.493	0	-3.4	162	Specific	364.64	115.14	115.14	2.91	38	>sp|P02768|ALBU_HUMAN Serum albumin OS=Homo sapiens GN=ALB PE=1 SV=2	749	File384_Scan6818	controllerType=0 controllerNumber=1 scan=6818	24.8625
04601:2	2	K.YLYEIAR.R			464.25	2	927.494	927.493	0	0.1	162	Specific	448.4	159.76	159.76	5.57	38	>sp|P02768|ALBU_HUMAN Serum albumin OS=Homo sapiens GN=ALB PE=1 SV=2	749	File384_Scan6685	controllerType=0 controllerNumber=1 scan=6685	24.553
12124:3	2	R.HPYFYAPELLFFAK.R			581.636	3	1742.89	1742.89	0	0.2	170	Specific	30.15	30.15	30.15	1.54	38	>sp|P02768|ALBU_HUMAN Serum albumin OS=Homo sapiens GN=ALB PE=1 SV=2	749	File384_Scan14723	controllerType=0 controllerNumber=1 scan=14723	41.9858
12047:2	2	R.HPYFYAPELLFFAK.R			871.952	2	1742.9	1742.89	0	2	170	Specific	84.07	84.07	84.07	1.81	38	>sp|P02768|ALBU_HUMAN Serum albumin OS=Homo sapiens GN=ALB PE=1 SV=2	749	File384_Scan14622	controllerType=0 controllerNumber=1 scan=14622	41.7603
11929:3	2	R.HPYFYAPELLFFAK.R			581.637	3	1742.9	1742.89	0	0.9	170	Specific	369.6	369.6	369.6	8.23	38	>sp|P02768|ALBU_HUMAN Serum albumin OS=Homo sapiens GN=ALB PE=1 SV=2	749	File384_Scan14482	controllerType=0 controllerNumber=1 scan=14482	41.4517
12022:3	2	R.HPYFYAPELLFFAK.R			581.636	3	1742.89	1742.89	0	0.2	170	Specific	440.36	440.36	440.36	9.61	38	>sp|P02768|ALBU_HUMAN Serum albumin OS=Homo sapiens GN=ALB PE=1 SV=2	749	File384_Scan14594	controllerType=0 controllerNumber=1 scan=14594	41.6977
01323:2	2	K.AAFTEC[+57.021]C[+57.021]QAADK.A		C[+57]*2	686.287	2	1371.57	1371.57	0	0	187	Specific	667.76	505.56	505.56	13.38	38	>sp|P02768|ALBU_HUMAN Serum albumin OS=Homo sapiens GN=ALB PE=1 SV=2	749	File384_Scan3038	controllerType=0 controllerNumber=1 scan=3038	16.282
00751:2	2	K.LDELRDEGK.A			537.776	2	1074.54	1074.54	0	1.5	206	Specific	876.28	520.44	520.44	15.49	38	>sp|P02768|ALBU_HUMAN Serum albumin OS=Homo sapiens GN=ALB PE=1 SV=2	749	File384_Scan2439	controllerType=0 controllerNumber=1 scan=2439	15.0098
02181:2	2	K.AEFAEVSK.L			440.724	2	880.441	880.441	0	0.3	250	Specific	341.98	226.94	226.94	6.26	38	>sp|P02768|ALBU_HUMAN Serum albumin OS=Homo sapiens GN=ALB PE=1 SV=2	749	File384_Scan3939	controllerType=0 controllerNumber=1 scan=3939	18.1523
02064:2	2	K.AEFAEVSK.L			440.724	2	880.441	880.441	0	0.1	250	Specific	382.22	272.22	272.22	6.16	38	>sp|P02768|ALBU_HUMAN Serum albumin OS=Homo sapiens GN=ALB PE=1 SV=2	749	File384_Scan3817	controllerType=0 controllerNumber=1 scan=3817	17.8831
01955:2	2	K.AEFAEVSK.L			440.724	2	880.44	880.441	0	-0.7	250	Specific	409.78	273.47	273.47	6.14	38	>sp|P02768|ALBU_HUMAN Serum albumin OS=Homo sapiens GN=ALB PE=1 SV=2	749	File384_Scan3703	controllerType=0 controllerNumber=1 scan=3703	17.6343
01851:2	2	K.AEFAEVSK.L			440.724	2	880.441	880.441	0	0.2	250	Specific	465.22	165.55	165.55	6.26	38	>sp|P02768|ALBU_HUMAN Serum albumin OS=Homo sapiens GN=ALB PE=1 SV=2	749	File384_Scan3594	controllerType=0 controllerNumber=1 scan=3594	17.4103
01751:2	2	K.AEFAEVSK.L			440.724	2	880.441	880.441	0	-0.1	250	Specific	503.24	187.47	187.47	6.33	38	>sp|P02768|ALBU_HUMAN Serum albumin OS=Homo sapiens GN=ALB PE=1 SV=2	749	File384_Scan3489	controllerType=0 controllerNumber=1 scan=3489	17.1984
01502:2	2	K.YIC[+57.021]ENQDSISSK.L		C[+57]	722.325	2	1443.64	1443.64	0	0.7	287	Specific	450.8	229.38	229.38	7.29	38	>sp|P02768|ALBU_HUMAN Serum albumin OS=Homo sapiens GN=ALB PE=1 SV=2	749	File384_Scan3227	controllerType=0 controllerNumber=1 scan=3227	16.6594
01386:2	2	K.YIC[+57.021]ENQDSISSK.L		C[+57]	722.325	2	1443.64	1443.64	0	0.8	287	Specific	661.88	387.21	387.21	13.61	38	>sp|P02768|ALBU_HUMAN Serum albumin OS=Homo sapiens GN=ALB PE=1 SV=2	749	File384_Scan3104	controllerType=0 controllerNumber=1 scan=3104	16.4125
01314:3	2	K.EC[+57.021]C[+57.021]EKPLLEK.S		C[+57]*2	435.877	3	1305.62	1305.62	0	0.1	301	Specific	316.74	172.22	172.22	5.52	38	>sp|P02768|ALBU_HUMAN Serum albumin OS=Homo sapiens GN=ALB PE=1 SV=2	749	File384_Scan3028	controllerType=0 controllerNumber=1 scan=3028	16.2628
09918:3	2	K.SHC[+57.021]IAEVENDEM[+15.995]PADLPSLAADFVESK.D		C[+57], M[+16]	997.453	3	2990.34	2990.34	0	1.6	311	Specific	202.1	202.1	202.1	5.44	38	>sp|P02768|ALBU_HUMAN Serum albumin OS=Homo sapiens GN=ALB PE=1 SV=2	749	File384_Scan12289	controllerType=0 controllerNumber=1 scan=12289	36.6759
10025:3	2	K.SHC[+57.021]IAEVENDEM[+15.995]PADLPSLAADFVESK.D		C[+57], M[+16]	997.454	3	2990.35	2990.34	0	2.3	311	Specific	229.69	229.69	229.69	5.29	38	>sp|P02768|ALBU_HUMAN Serum albumin OS=Homo sapiens GN=ALB PE=1 SV=2	749	File384_Scan12401	controllerType=0 controllerNumber=1 scan=12401	36.9155
10150:3	2	K.SHC[+57.021]IAEVENDEM[+15.995]PADLPSLAADFVESK.D		C[+57], M[+16]	997.451	3	2990.34	2990.34	0	0	311	Specific	293.09	293.09	293.09	7.84	38	>sp|P02768|ALBU_HUMAN Serum albumin OS=Homo sapiens GN=ALB PE=1 SV=2	749	File384_Scan12532	controllerType=0 controllerNumber=1 scan=12532	37.1835
09811:3	2	K.SHC[+57.021]IAEVENDEM[+15.995]PADLPSLAADFVESK.D		C[+57], M[+16]	997.452	3	2990.34	2990.34	0	0.8	311	Specific	376.35	376.35	376.35	8.79	38	>sp|P02768|ALBU_HUMAN Serum albumin OS=Homo sapiens GN=ALB PE=1 SV=2	749	File384_Scan12175	controllerType=0 controllerNumber=1 scan=12175	36.4329
09494:3	2	K.SHC[+57.021]IAEVENDEM[+15.995]PADLPSLAADFVESK.D		C[+57], M[+16]	997.455	3	2990.35	2990.34	0	3.5	311	Specific	402.32	402.32	402.32	9.01	38	>sp|P02768|ALBU_HUMAN Serum albumin OS=Homo sapiens GN=ALB PE=1 SV=2	749	File384_Scan11837	controllerType=0 controllerNumber=1 scan=11837	35.7287
09708:3	2	K.SHC[+57.021]IAEVENDEM[+15.995]PADLPSLAADFVESK.D		C[+57], M[+16]	997.453	3	2990.34	2990.34	0	1.3	311	Specific	667.16	667.16	667.16	14.12	38	>sp|P02768|ALBU_HUMAN Serum albumin OS=Homo sapiens GN=ALB PE=1 SV=2	749	File384_Scan12065	controllerType=0 controllerNumber=1 scan=12065	36.2012
09606:3	2	K.SHC[+57.021]IAEVENDEM[+15.995]PADLPSLAADFVESK.D		C[+57], M[+16]	997.452	3	2990.34	2990.34	0	0.2	311	Specific	901.2	901.2	901.2	18.98	38	>sp|P02768|ALBU_HUMAN Serum albumin OS=Homo sapiens GN=ALB PE=1 SV=2	749	File384_Scan11956	controllerType=0 controllerNumber=1 scan=11956	35.9732
11252:3	2	R.RHPDYSVVLLLR.L			489.953	3	1467.84	1467.84	0	0.1	361	Specific	61.69	61.69	61.69	1.82	38	>sp|P02768|ALBU_HUMAN Serum albumin OS=Homo sapiens GN=ALB PE=1 SV=2	749	File384_Scan13695	controllerType=0 controllerNumber=1 scan=13695	39.5461
11958:3	2	R.RHPDYSVVLLLR.L			489.953	3	1467.84	1467.84	0	0.3	361	Specific	74.58	74.58	74.58	2.19	38	>sp|P02768|ALBU_HUMAN Serum albumin OS=Homo sapiens GN=ALB PE=1 SV=2	749	File384_Scan14514	controllerType=0 controllerNumber=1 scan=14514	41.524
10985:3	2	R.RHPDYSVVLLLR.L			489.953	3	1467.84	1467.84	0	0.5	361	Specific	84.98	84.98	84.98	2.31	38	>sp|P02768|ALBU_HUMAN Serum albumin OS=Homo sapiens GN=ALB PE=1 SV=2	749	File384_Scan13416	controllerType=0 controllerNumber=1 scan=13416	38.9539
14041:3	2	R.RHPDYSVVLLLR.L			489.953	3	1467.84	1467.84	0	1	361	Specific	165.11	165.11	165.11	4.1	38	>sp|P02768|ALBU_HUMAN Serum albumin OS=Homo sapiens GN=ALB PE=1 SV=2	749	File384_Scan17358	controllerType=0 controllerNumber=1 scan=17358	50.2379
13676:3	2	R.RHPDYSVVLLLR.L			489.952	3	1467.84	1467.84	0	0	361	Specific	169.63	169.63	169.63	3.63	38	>sp|P02768|ALBU_HUMAN Serum albumin OS=Homo sapiens GN=ALB PE=1 SV=2	749	File384_Scan16844	controllerType=0 controllerNumber=1 scan=16844	48.5818
12045:3	2	R.RHPDYSVVLLLR.L			489.953	3	1467.84	1467.84	0	0.4	361	Specific	234.61	234.61	234.61	6.27	38	>sp|P02768|ALBU_HUMAN Serum albumin OS=Homo sapiens GN=ALB PE=1 SV=2	749	File384_Scan14620	controllerType=0 controllerNumber=1 scan=14620	41.7566
13769:3	2	R.RHPDYSVVLLLR.L			489.952	3	1467.84	1467.84	0	-0.2	361	Specific	258.46	258.46	258.46	6.22	38	>sp|P02768|ALBU_HUMAN Serum albumin OS=Homo sapiens GN=ALB PE=1 SV=2	749	File384_Scan16953	controllerType=0 controllerNumber=1 scan=16953	48.8201
14006:3	2	R.RHPDYSVVLLLR.L			489.953	3	1467.84	1467.84	0	0.1	361	Specific	278.77	278.77	278.77	6.79	38	>sp|P02768|ALBU_HUMAN Serum albumin OS=Homo sapiens GN=ALB PE=1 SV=2	749	File384_Scan17283	controllerType=0 controllerNumber=1 scan=17283	49.8866
14024:3	2	R.RHPDYSVVLLLR.L			489.953	3	1467.84	1467.84	0	0.1	361	Specific	294.78	294.78	294.78	6.9	38	>sp|P02768|ALBU_HUMAN Serum albumin OS=Homo sapiens GN=ALB PE=1 SV=2	749	File384_Scan17320	controllerType=0 controllerNumber=1 scan=17320	50.0555
13844:3	2	R.RHPDYSVVLLLR.L			489.953	3	1467.84	1467.84	0	0.3	361	Specific	334.96	334.96	334.96	7.25	38	>sp|P02768|ALBU_HUMAN Serum albumin OS=Homo sapiens GN=ALB PE=1 SV=2	749	File384_Scan17037	controllerType=0 controllerNumber=1 scan=17037	49.0128
13965:3	2	R.RHPDYSVVLLLR.L			489.953	3	1467.84	1467.84	0	0.4	361	Specific	335.56	335.56	335.56	7.25	38	>sp|P02768|ALBU_HUMAN Serum albumin OS=Homo sapiens GN=ALB PE=1 SV=2	749	File384_Scan17204	controllerType=0 controllerNumber=1 scan=17204	49.5416
13941:3	2	R.RHPDYSVVLLLR.L			489.953	3	1467.84	1467.84	0	0.1	361	Specific	353.18	353.18	353.18	7.43	38	>sp|P02768|ALBU_HUMAN Serum albumin OS=Homo sapiens GN=ALB PE=1 SV=2	749	File384_Scan17162	controllerType=0 controllerNumber=1 scan=17162	49.3697
13988:3	2	R.RHPDYSVVLLLR.L			489.952	3	1467.84	1467.84	0	0	361	Specific	364.72	364.72	364.72	7.85	38	>sp|P02768|ALBU_HUMAN Serum albumin OS=Homo sapiens GN=ALB PE=1 SV=2	749	File384_Scan17245	controllerType=0 controllerNumber=1 scan=17245	49.7104
13900:3	2	R.RHPDYSVVLLLR.L			489.953	3	1467.84	1467.84	0	0.3	361	Specific	375.28	375.28	375.28	7.85	38	>sp|P02768|ALBU_HUMAN Serum albumin OS=Homo sapiens GN=ALB PE=1 SV=2	749	File384_Scan17105	controllerType=0 controllerNumber=1 scan=17105	49.1926
08357:2	2	R.HPDYSVVLLLR.L			656.375	2	1311.74	1311.74	0	0.2	362	Specific	446.57	265.68	265.68	6.22	38	>sp|P02768|ALBU_HUMAN Serum albumin OS=Homo sapiens GN=ALB PE=1 SV=2	749	File384_Scan10634	controllerType=0 controllerNumber=1 scan=10634	33.2261
08230:2	2	R.HPDYSVVLLLR.L			656.373	2	1311.74	1311.74	0	-3	362	Specific	710.03	496.92	496.92	12.41	38	>sp|P02768|ALBU_HUMAN Serum albumin OS=Homo sapiens GN=ALB PE=1 SV=2	749	File384_Scan10501	controllerType=0 controllerNumber=1 scan=10501	32.9683
01721:2	2	K.TYETTLEK.C			492.748	2	984.488	984.488	0	-0.6	376	Specific	318.24	183.12	183.12	4.85	38	>sp|P02768|ALBU_HUMAN Serum albumin OS=Homo sapiens GN=ALB PE=1 SV=2	749	File384_Scan3457	controllerType=0 controllerNumber=1 scan=3457	17.1277
01575:2	2	K.TYETTLEK.C			492.748	2	984.489	984.488	0	0.5	376	Specific	348.23	206.82	206.82	5.5	38	>sp|P02768|ALBU_HUMAN Serum albumin OS=Homo sapiens GN=ALB PE=1 SV=2	749	File384_Scan3304	controllerType=0 controllerNumber=1 scan=3304	16.8145
01610:2	2	K.TYETTLEK.C			492.748	2	984.488	984.488	0	-0.4	376	Specific	416.24	235.56	235.56	6.2	38	>sp|P02768|ALBU_HUMAN Serum albumin OS=Homo sapiens GN=ALB PE=1 SV=2	749	File384_Scan3341	controllerType=0 controllerNumber=1 scan=3341	16.8904
01488:2	2	K.TYETTLEK.C			492.748	2	984.489	984.488	0	0.6	376	Specific	525.98	223.72	223.72	7.8	38	>sp|P02768|ALBU_HUMAN Serum albumin OS=Homo sapiens GN=ALB PE=1 SV=2	749	File384_Scan3213	controllerType=0 controllerNumber=1 scan=3213	16.637
13239:3	2	K.VFDEFKPLVEEPQNLIK.Q			682.37	3	2045.1	2045.1	0	0.7	397	Specific	17.58	17.58	17.58	1.76	38	>sp|P02768|ALBU_HUMAN Serum albumin OS=Homo sapiens GN=ALB PE=1 SV=2	749	File384_Scan16373	controllerType=0 controllerNumber=1 scan=16373	47.6014
10054:3	2	K.VFDEFKPLVEEPQNLIK.Q			682.37	3	2045.1	2045.1	0	-0.1	397	Specific	149.97	149.97	149.97	2.9	38	>sp|P02768|ALBU_HUMAN Serum albumin OS=Homo sapiens GN=ALB PE=1 SV=2	749	File384_Scan12431	controllerType=0 controllerNumber=1 scan=12431	36.9751
09741:3	2	K.VFDEFKPLVEEPQNLIK.Q			682.371	3	2045.1	2045.1	0	1.1	397	Specific	157.48	157.48	157.48	4.42	38	>sp|P02768|ALBU_HUMAN Serum albumin OS=Homo sapiens GN=ALB PE=1 SV=2	749	File384_Scan12099	controllerType=0 controllerNumber=1 scan=12099	36.2713
09867:3	2	K.VFDEFKPLVEEPQNLIK.Q			682.369	3	2045.09	2045.1	0	-0.8	397	Specific	161.92	161.92	161.92	2.96	38	>sp|P02768|ALBU_HUMAN Serum albumin OS=Homo sapiens GN=ALB PE=1 SV=2	749	File384_Scan12235	controllerType=0 controllerNumber=1 scan=12235	36.5579
09636:3	2	K.VFDEFKPLVEEPQNLIK.Q			682.37	3	2045.1	2045.1	0	0.7	397	Specific	218.75	218.75	218.75	5	38	>sp|P02768|ALBU_HUMAN Serum albumin OS=Homo sapiens GN=ALB PE=1 SV=2	749	File384_Scan11987	controllerType=0 controllerNumber=1 scan=11987	36.0378
09178:2	2	K.VFDEFKPLVEEPQNLIK.Q			1023.05	2	2045.1	2045.1	0	2.1	397	Specific	296.9	296.9	296.9	5.92	38	>sp|P02768|ALBU_HUMAN Serum albumin OS=Homo sapiens GN=ALB PE=1 SV=2	749	File384_Scan11506	controllerType=0 controllerNumber=1 scan=11506	35.0121
09455:3	2	K.VFDEFKPLVEEPQNLIK.Q			682.37	3	2045.09	2045.1	0	-0.7	397	Specific	302.91	302.91	302.91	6.61	38	>sp|P02768|ALBU_HUMAN Serum albumin OS=Homo sapiens GN=ALB PE=1 SV=2	749	File384_Scan11796	controllerType=0 controllerNumber=1 scan=11796	35.6316
09579:3	2	K.VFDEFKPLVEEPQNLIK.Q			682.371	3	2045.1	2045.1	0	2.1	397	Specific	330.03	330.03	330.03	6.7	38	>sp|P02768|ALBU_HUMAN Serum albumin OS=Homo sapiens GN=ALB PE=1 SV=2	749	File384_Scan11926	controllerType=0 controllerNumber=1 scan=11926	35.9078
09180:2	2	K.VFDEFKPLVEEPQNLIK.Q			1023.05	2	2045.1	2045.1	0	2.1	397	Specific	373.69	266.59	266.59	5.98	38	>sp|P02768|ALBU_HUMAN Serum albumin OS=Homo sapiens GN=ALB PE=1 SV=2	749	File384_Scan11508	controllerType=0 controllerNumber=1 scan=11508	35.0188
09350:3	2	K.VFDEFKPLVEEPQNLIK.Q			682.37	3	2045.1	2045.1	0	0.8	397	Specific	422.26	422.26	422.26	9.75	38	>sp|P02768|ALBU_HUMAN Serum albumin OS=Homo sapiens GN=ALB PE=1 SV=2	749	File384_Scan11686	controllerType=0 controllerNumber=1 scan=11686	35.3992
09239:3	2	K.VFDEFKPLVEEPQNLIK.Q			682.37	3	2045.09	2045.1	0	-0.4	397	Specific	677.36	635.09	635.09	13.45	38	>sp|P02768|ALBU_HUMAN Serum albumin OS=Homo sapiens GN=ALB PE=1 SV=2	749	File384_Scan11570	controllerType=0 controllerNumber=1 scan=11570	35.1515
09133:3	2	K.VFDEFKPLVEEPQNLIK.Q			682.371	3	2045.1	2045.1	0	1	397	Specific	734.94	691.05	691.05	14.67	38	>sp|P02768|ALBU_HUMAN Serum albumin OS=Homo sapiens GN=ALB PE=1 SV=2	749	File384_Scan11459	controllerType=0 controllerNumber=1 scan=11459	34.9169
09068:2	2	K.VFDEFKPLVEEPQNLIK.Q			1023.05	2	2045.1	2045.1	0	1.2	397	Specific	743.63	650.78	650.78	14.25	38	>sp|P02768|ALBU_HUMAN Serum albumin OS=Homo sapiens GN=ALB PE=1 SV=2	749	File384_Scan11391	controllerType=0 controllerNumber=1 scan=11391	34.7653
09029:3	2	K.VFDEFKPLVEEPQNLIK.Q			682.37	3	2045.1	2045.1	0	0.2	397	Specific	746.28	683.43	683.43	14.67	38	>sp|P02768|ALBU_HUMAN Serum albumin OS=Homo sapiens GN=ALB PE=1 SV=2	749	File384_Scan11350	controllerType=0 controllerNumber=1 scan=11350	34.6787
09070:2	2	K.VFDEFKPLVEEPQNLIK.Q			1023.05	2	2045.1	2045.1	0	1.2	397	Specific	751.45	598.07	598.07	15.25	38	>sp|P02768|ALBU_HUMAN Serum albumin OS=Homo sapiens GN=ALB PE=1 SV=2	749	File384_Scan11393	controllerType=0 controllerNumber=1 scan=11393	34.7752
07371:2	2	K.QNC[+57.021]ELFEQLGEYK.F		C[+57]	829.381	2	1657.76	1657.75	0	1.5	414	Specific	344.23	344.23	344.23	6.89	38	>sp|P02768|ALBU_HUMAN Serum albumin OS=Homo sapiens GN=ALB PE=1 SV=2	749	File384_Scan9598	controllerType=0 controllerNumber=1 scan=9598	31.1217
07263:2	2	K.QNC[+57.021]ELFEQLGEYK.F		C[+57]	829.379	2	1657.75	1657.75	0	-1.6	414	Specific	804.69	735.64	735.64	15.97	38	>sp|P02768|ALBU_HUMAN Serum albumin OS=Homo sapiens GN=ALB PE=1 SV=2	749	File384_Scan9485	controllerType=0 controllerNumber=1 scan=9485	30.8928
05381:2	2	K.FQNALLVR.Y			480.785	2	960.563	960.562	0	0.2	427	Specific	388.9	131.48	131.48	5.36	38	>sp|P02768|ALBU_HUMAN Serum albumin OS=Homo sapiens GN=ALB PE=1 SV=2	749	File384_Scan7500	controllerType=0 controllerNumber=1 scan=7500	26.5403
05276:2	2	K.FQNALLVR.Y			480.785	2	960.563	960.562	0	0.6	427	Specific	455.94	166.52	166.52	6.4	38	>sp|P02768|ALBU_HUMAN Serum albumin OS=Homo sapiens GN=ALB PE=1 SV=2	749	File384_Scan7391	controllerType=0 controllerNumber=1 scan=7391	26.2967
05181:2	2	K.FQNALLVR.Y			480.785	2	960.563	960.562	0	0.1	427	Specific	511.7	200.54	200.54	7.45	38	>sp|P02768|ALBU_HUMAN Serum albumin OS=Homo sapiens GN=ALB PE=1 SV=2	749	File384_Scan7292	controllerType=0 controllerNumber=1 scan=7292	26.0514
04930:3	2	K.KVPQVSTPTLVEVSR.N			547.318	3	1639.94	1639.94	0	0.5	438	Specific	465.2	465.2	465.2	8.8	38	>sp|P02768|ALBU_HUMAN Serum albumin OS=Homo sapiens GN=ALB PE=1 SV=2	749	File384_Scan7031	controllerType=0 controllerNumber=1 scan=7031	25.4102
04853:2	2	K.KVPQVSTPTLVEVSR.N			820.473	2	1639.94	1639.94	0	0.2	438	Specific	598.51	561.02	561.02	10.84	38	>sp|P02768|ALBU_HUMAN Serum albumin OS=Homo sapiens GN=ALB PE=1 SV=2	749	File384_Scan6951	controllerType=0 controllerNumber=1 scan=6951	25.2153
04855:2	2	K.KVPQVSTPTLVEVSR.N			820.473	2	1639.94	1639.94	0	0.2	438	Specific	663	519.01	519.01	12.84	38	>sp|P02768|ALBU_HUMAN Serum albumin OS=Homo sapiens GN=ALB PE=1 SV=2	749	File384_Scan6953	controllerType=0 controllerNumber=1 scan=6953	25.2191
04826:3	2	K.KVPQVSTPTLVEVSR.N			547.318	3	1639.94	1639.94	0	0.7	438	Specific	719.47	685.36	685.36	14.4	38	>sp|P02768|ALBU_HUMAN Serum albumin OS=Homo sapiens GN=ALB PE=1 SV=2	749	File384_Scan6923	controllerType=0 controllerNumber=1 scan=6923	25.1403
05990:2	2	K.VPQVSTPTLVEVSR.N			756.426	2	1511.84	1511.84	0	0.9	439	Specific	770.32	430.59	430.59	15.42	38	>sp|P02768|ALBU_HUMAN Serum albumin OS=Homo sapiens GN=ALB PE=1 SV=2	749	File384_Scan8151	controllerType=0 controllerNumber=1 scan=8151	28.087
01623:2	2	K.C[+57.021]C[+57.021]TESLVNR.R		C[+57]*2	569.753	2	1138.5	1138.5	0	-0.2	500	Specific	271.94	187.21	187.21	5.3	38	>sp|P02768|ALBU_HUMAN Serum albumin OS=Homo sapiens GN=ALB PE=1 SV=2	749	File384_Scan3354	controllerType=0 controllerNumber=1 scan=3354	16.9164
01495:2	2	K.C[+57.021]C[+57.021]TESLVNR.R		C[+57]*2	569.753	2	1138.5	1138.5	0	0.7	500	Specific	642.1	454.66	454.66	12.47	38	>sp|P02768|ALBU_HUMAN Serum albumin OS=Homo sapiens GN=ALB PE=1 SV=2	749	File384_Scan3220	controllerType=0 controllerNumber=1 scan=3220	16.6479
06155:2	2	R.RPC[+57.021]FSALEVDETYVPK.E		C[+57]	955.97	2	1910.93	1910.93	0	0.4	509	Specific	362.1	284.96	284.96	6.43	38	>sp|P02768|ALBU_HUMAN Serum albumin OS=Homo sapiens GN=ALB PE=1 SV=2	749	File384_Scan8324	controllerType=0 controllerNumber=1 scan=8324	28.4718
06237:3	2	R.RPC[+57.021]FSALEVDETYVPK.E		C[+57]	637.649	3	1910.93	1910.93	0	1	509	Specific	648.32	648.32	648.32	12.67	38	>sp|P02768|ALBU_HUMAN Serum albumin OS=Homo sapiens GN=ALB PE=1 SV=2	749	File384_Scan8410	controllerType=0 controllerNumber=1 scan=8410	28.6539
06130:3	2	R.RPC[+57.021]FSALEVDETYVPK.E		C[+57]	637.649	3	1910.93	1910.93	0	0.1	509	Specific	740.4	698.48	698.48	14.67	38	>sp|P02768|ALBU_HUMAN Serum albumin OS=Homo sapiens GN=ALB PE=1 SV=2	749	File384_Scan8298	controllerType=0 controllerNumber=1 scan=8298	28.4165
08420:3	2	K.EFNAETFTFHADIC[+57.021]TLSEK.E		C[+57]	754.012	3	2260.02	2260.02	0	-0.3	525	Specific	121.28	121.28	121.28	2.92	38	>sp|P02768|ALBU_HUMAN Serum albumin OS=Homo sapiens GN=ALB PE=1 SV=2	749	File384_Scan10700	controllerType=0 controllerNumber=1 scan=10700	33.3566
08243:3	2	K.EFNAETFTFHADIC[+57.021]TLSEK.E		C[+57]	754.011	3	2260.02	2260.02	0	-1.6	525	Specific	595.53	576.38	576.38	11.95	38	>sp|P02768|ALBU_HUMAN Serum albumin OS=Homo sapiens GN=ALB PE=1 SV=2	749	File384_Scan10515	controllerType=0 controllerNumber=1 scan=10515	32.9963
08140:3	2	K.EFNAETFTFHADIC[+57.021]TLSEK.E		C[+57]	754.013	3	2260.03	2260.02	0	1.2	525	Specific	830.23	693.41	693.41	17.55	38	>sp|P02768|ALBU_HUMAN Serum albumin OS=Homo sapiens GN=ALB PE=1 SV=2	749	File384_Scan10407	controllerType=0 controllerNumber=1 scan=10407	32.7755
04259:2	2	K.KQTALVELVK.H			564.853	2	1128.7	1128.7	0	0	549	Specific	795.75	508.74	508.74	14.69	38	>sp|P02768|ALBU_HUMAN Serum albumin OS=Homo sapiens GN=ALB PE=1 SV=2	749	File384_Scan6276	controllerType=0 controllerNumber=1 scan=6276	23.5305
05952:2	2	K.QTALVELVK.H			500.806	2	1000.6	1000.6	0	0.9	550	Specific	607.55	314.65	314.65	10.83	38	>sp|P02768|ALBU_HUMAN Serum albumin OS=Homo sapiens GN=ALB PE=1 SV=2	749	File384_Scan8112	controllerType=0 controllerNumber=1 scan=8112	27.9997
07326:2	2	K.AVM[+15.995]DDFAAFVEK.C		M[+16]	679.819	2	1358.63	1358.63	0	0.7	570	Specific	666.21	609.94	609.94	13.61	38	>sp|P02768|ALBU_HUMAN Serum albumin OS=Homo sapiens GN=ALB PE=1 SV=2	749	File384_Scan9551	controllerType=0 controllerNumber=1 scan=9551	31.0291
07443:2	2	K.AVM[+15.995]DDFAAFVEK.C		M[+16]	679.819	2	1358.63	1358.63	0	1.4	570	Specific	667.14	536.23	536.23	13.75	38	>sp|P02768|ALBU_HUMAN Serum albumin OS=Homo sapiens GN=ALB PE=1 SV=2	749	File384_Scan9676	controllerType=0 controllerNumber=1 scan=9676	31.2834
00921:3	2	K.ADDKETC[+57.021]FAEEGK.K		C[+57]	500.549	3	1499.63	1499.63	0	0.3	585	Specific	396.73	393.9	393.9	7.97	38	>sp|P02768|ALBU_HUMAN Serum albumin OS=Homo sapiens GN=ALB PE=1 SV=2	749	File384_Scan2617	controllerType=0 controllerNumber=1 scan=2617	15.3871
00561:4	2	K.ADDKETC[+57.021]FAEEGKK.L		C[+57]	407.687	4	1627.73	1627.73	0	-0.3	585	Specific	165.27	46.54	46.54	0.25	38	>sp|P02768|ALBU_HUMAN Serum albumin OS=Homo sapiens GN=ALB PE=1 SV=2	749	File384_Scan2241	controllerType=0 controllerNumber=1 scan=2241	14.5406
00673:3	2	K.ADDKETC[+57.021]FAEEGKK.L		C[+57]	543.247	3	1627.73	1627.73	0	-0.7	585	Specific	351.55	321.99	321.99	4.52	38	>sp|P02768|ALBU_HUMAN Serum albumin OS=Homo sapiens GN=ALB PE=1 SV=2	749	File384_Scan2357	controllerType=0 controllerNumber=1 scan=2357	14.8153
00526:3	2	K.ADDKETC[+57.021]FAEEGKK.L		C[+57]	543.247	3	1627.73	1627.73	0	0.1	585	Specific	926.37	744.6	744.6	16.57	38	>sp|P02768|ALBU_HUMAN Serum albumin OS=Homo sapiens GN=ALB PE=1 SV=2	749	File384_Scan2205	controllerType=0 controllerNumber=1 scan=2205	14.4524
06093:2	2	K.KLVAASQAALGL.-			571.351	2	1141.7	1141.69	0	1.1	598	CRagged	176.82	174.98	174.98	2.89	38	>sp|P02768|ALBU_HUMAN Serum albumin OS=Homo sapiens GN=ALB PE=1 SV=2	749	File384_Scan8259	controllerType=0 controllerNumber=1 scan=8259	28.3306
08182:2	2	K.LVAASQAALGL.-			507.303	2	1013.6	1013.6	0	0.5	599	CRagged	369.85	349.33	349.33	8.12	38	>sp|P02768|ALBU_HUMAN Serum albumin OS=Homo sapiens GN=ALB PE=1 SV=2	749	File384_Scan10451	controllerType=0 controllerNumber=1 scan=10451	32.8698
08076:2	2	K.LVAASQAALGL.-			507.303	2	1013.6	1013.6	0	0.6	599	CRagged	532.94	307.06	307.06	7.76	38	>sp|P02768|ALBU_HUMAN Serum albumin OS=Homo sapiens GN=ALB PE=1 SV=2	749	File384_Scan10340	controllerType=0 controllerNumber=1 scan=10340	32.6425
10228:3	3	R.NFPPSQDASGDLYTTSSQLTLPATQC[+57.021]LAGK.S		C[+57]	1056.84	3	3168.52	3168.52	0	1.5	52	Specific	8.63	8.63	8.63	2.2	41	>sp|P01876|IGHA1_HUMAN Immunoglobulin heavy constant alpha 1 OS=Homo sapiens GN=IGHA1 PE=1 SV=2	11916	File384_Scan12618	controllerType=0 controllerNumber=1 scan=12618	37.3651
08949:2	3	R.NFPPSQDASGDLYTTSSQLTLPATQC[+57.021]LAGK.S		C[+57]	1584.76	2	3168.52	3168.52	0	0.2	52	Specific	67.98	67.98	67.98	3.47	41	>sp|P01876|IGHA1_HUMAN Immunoglobulin heavy constant alpha 1 OS=Homo sapiens GN=IGHA1 PE=1 SV=2	11916	File384_Scan11266	controllerType=0 controllerNumber=1 scan=11266	34.4998
09709:3	3	R.NFPPSQDASGDLYTTSSQLTLPATQC[+57.021]LAGK.S		C[+57]	1056.85	3	3168.52	3168.52	0	1.9	52	Specific	218.55	218.55	218.55	6.76	41	>sp|P01876|IGHA1_HUMAN Immunoglobulin heavy constant alpha 1 OS=Homo sapiens GN=IGHA1 PE=1 SV=2	11916	File384_Scan12066	controllerType=0 controllerNumber=1 scan=12066	36.2056
10122:3	3	R.NFPPSQDASGDLYTTSSQLTLPATQC[+57.021]LAGK.S		C[+57]	1056.85	3	3168.52	3168.52	0	1.7	52	Specific	225.81	225.81	225.81	7.87	41	>sp|P01876|IGHA1_HUMAN Immunoglobulin heavy constant alpha 1 OS=Homo sapiens GN=IGHA1 PE=1 SV=2	11916	File384_Scan12503	controllerType=0 controllerNumber=1 scan=12503	37.1235
09813:3	3	R.NFPPSQDASGDLYTTSSQLTLPATQC[+57.021]LAGK.S		C[+57]	1056.84	3	3168.52	3168.52	0	1.2	52	Specific	315.93	315.93	315.93	8.62	41	>sp|P01876|IGHA1_HUMAN Immunoglobulin heavy constant alpha 1 OS=Homo sapiens GN=IGHA1 PE=1 SV=2	11916	File384_Scan12177	controllerType=0 controllerNumber=1 scan=12177	36.4387
10022:3	3	R.NFPPSQDASGDLYTTSSQLTLPATQC[+57.021]LAGK.S		C[+57]	1056.84	3	3168.52	3168.52	0	0.9	52	Specific	361.72	361.72	361.72	9.31	41	>sp|P01876|IGHA1_HUMAN Immunoglobulin heavy constant alpha 1 OS=Homo sapiens GN=IGHA1 PE=1 SV=2	11916	File384_Scan12398	controllerType=0 controllerNumber=1 scan=12398	36.9096
09016:4	3	R.NFPPSQDASGDLYTTSSQLTLPATQC[+57.021]LAGK.S		C[+57]	792.885	4	3168.52	3168.52	0	1.2	52	Specific	369.61	369.61	369.61	7.77	41	>sp|P01876|IGHA1_HUMAN Immunoglobulin heavy constant alpha 1 OS=Homo sapiens GN=IGHA1 PE=1 SV=2	11916	File384_Scan11336	controllerType=0 controllerNumber=1 scan=11336	34.6459
08455:4	3	R.NFPPSQDASGDLYTTSSQLTLPATQC[+57.021]LAGK.S		C[+57]	792.884	4	3168.51	3168.52	0	-0.3	52	Specific	383.71	383.71	383.71	9.79	41	>sp|P01876|IGHA1_HUMAN Immunoglobulin heavy constant alpha 1 OS=Homo sapiens GN=IGHA1 PE=1 SV=2	11916	File384_Scan10737	controllerType=0 controllerNumber=1 scan=10737	33.4311
09594:3	3	R.NFPPSQDASGDLYTTSSQLTLPATQC[+57.021]LAGK.S		C[+57]	1056.84	3	3168.52	3168.52	0	0.1	52	Specific	450.99	450.99	450.99	10.69	41	>sp|P01876|IGHA1_HUMAN Immunoglobulin heavy constant alpha 1 OS=Homo sapiens GN=IGHA1 PE=1 SV=2	11916	File384_Scan11942	controllerType=0 controllerNumber=1 scan=11942	35.945
08912:4	3	R.NFPPSQDASGDLYTTSSQLTLPATQC[+57.021]LAGK.S		C[+57]	792.885	4	3168.52	3168.52	0	1.3	52	Specific	469.77	469.77	469.77	10.42	41	>sp|P01876|IGHA1_HUMAN Immunoglobulin heavy constant alpha 1 OS=Homo sapiens GN=IGHA1 PE=1 SV=2	11916	File384_Scan11227	controllerType=0 controllerNumber=1 scan=11227	34.4166
08433:2	3	R.NFPPSQDASGDLYTTSSQLTLPATQC[+57.021]LAGK.S		C[+57]	1584.76	2	3168.52	3168.52	0	2.2	52	Specific	471.19	471.19	471.19	10.34	41	>sp|P01876|IGHA1_HUMAN Immunoglobulin heavy constant alpha 1 OS=Homo sapiens GN=IGHA1 PE=1 SV=2	11916	File384_Scan10714	controllerType=0 controllerNumber=1 scan=10714	33.3842
09914:3	3	R.NFPPSQDASGDLYTTSSQLTLPATQC[+57.021]LAGK.S		C[+57]	1056.84	3	3168.52	3168.52	0	1.3	52	Specific	474.54	474.54	474.54	10.94	41	>sp|P01876|IGHA1_HUMAN Immunoglobulin heavy constant alpha 1 OS=Homo sapiens GN=IGHA1 PE=1 SV=2	11916	File384_Scan12285	controllerType=0 controllerNumber=1 scan=12285	36.666
09487:3	3	R.NFPPSQDASGDLYTTSSQLTLPATQC[+57.021]LAGK.S		C[+57]	1056.85	3	3168.52	3168.52	0	2.1	52	Specific	506.33	506.33	506.33	10.63	41	>sp|P01876|IGHA1_HUMAN Immunoglobulin heavy constant alpha 1 OS=Homo sapiens GN=IGHA1 PE=1 SV=2	11916	File384_Scan11830	controllerType=0 controllerNumber=1 scan=11830	35.7035
09387:3	3	R.NFPPSQDASGDLYTTSSQLTLPATQC[+57.021]LAGK.S		C[+57]	1056.85	3	3168.52	3168.52	0	1.6	52	Specific	541.96	541.96	541.96	11.37	41	>sp|P01876|IGHA1_HUMAN Immunoglobulin heavy constant alpha 1 OS=Homo sapiens GN=IGHA1 PE=1 SV=2	11916	File384_Scan11725	controllerType=0 controllerNumber=1 scan=11725	35.4822
08845:2	3	R.NFPPSQDASGDLYTTSSQLTLPATQC[+57.021]LAGK.S		C[+57]	1584.76	2	3168.52	3168.52	0	1.2	52	Specific	578.05	578.05	578.05	11.45	41	>sp|P01876|IGHA1_HUMAN Immunoglobulin heavy constant alpha 1 OS=Homo sapiens GN=IGHA1 PE=1 SV=2	11916	File384_Scan11157	controllerType=0 controllerNumber=1 scan=11157	34.2732
08790:4	3	R.NFPPSQDASGDLYTTSSQLTLPATQC[+57.021]LAGK.S		C[+57]	792.885	4	3168.52	3168.52	0	0.7	52	Specific	580.85	580.85	580.85	11.98	41	>sp|P01876|IGHA1_HUMAN Immunoglobulin heavy constant alpha 1 OS=Homo sapiens GN=IGHA1 PE=1 SV=2	11916	File384_Scan11099	controllerType=0 controllerNumber=1 scan=11099	34.1545
08556:4	3	R.NFPPSQDASGDLYTTSSQLTLPATQC[+57.021]LAGK.S		C[+57]	792.881	4	3168.5	3168.52	0	-4.7	52	Specific	598.12	598.12	598.12	10.41	41	>sp|P01876|IGHA1_HUMAN Immunoglobulin heavy constant alpha 1 OS=Homo sapiens GN=IGHA1 PE=1 SV=2	11916	File384_Scan10846	controllerType=0 controllerNumber=1 scan=10846	33.6469
08747:2	3	R.NFPPSQDASGDLYTTSSQLTLPATQC[+57.021]LAGK.S		C[+57]	1584.76	2	3168.52	3168.52	0	1.4	52	Specific	604.75	604.75	604.75	13.56	41	>sp|P01876|IGHA1_HUMAN Immunoglobulin heavy constant alpha 1 OS=Homo sapiens GN=IGHA1 PE=1 SV=2	11916	File384_Scan11052	controllerType=0 controllerNumber=1 scan=11052	34.0612
09280:3	3	R.NFPPSQDASGDLYTTSSQLTLPATQC[+57.021]LAGK.S		C[+57]	1056.84	3	3168.52	3168.52	0	1.3	52	Specific	605.5	605.5	605.5	13.64	41	>sp|P01876|IGHA1_HUMAN Immunoglobulin heavy constant alpha 1 OS=Homo sapiens GN=IGHA1 PE=1 SV=2	11916	File384_Scan11613	controllerType=0 controllerNumber=1 scan=11613	35.2468
08361:3	3	R.NFPPSQDASGDLYTTSSQLTLPATQC[+57.021]LAGK.S		C[+57]	1056.85	3	3168.53	3168.52	0	3.5	52	Specific	607.96	607.96	607.96	12.29	41	>sp|P01876|IGHA1_HUMAN Immunoglobulin heavy constant alpha 1 OS=Homo sapiens GN=IGHA1 PE=1 SV=2	11916	File384_Scan10639	controllerType=0 controllerNumber=1 scan=10639	33.2382
09174:3	3	R.NFPPSQDASGDLYTTSSQLTLPATQC[+57.021]LAGK.S		C[+57]	1056.84	3	3168.52	3168.52	0	0.6	52	Specific	623.98	623.98	623.98	13.5	41	>sp|P01876|IGHA1_HUMAN Immunoglobulin heavy constant alpha 1 OS=Homo sapiens GN=IGHA1 PE=1 SV=2	11916	File384_Scan11502	controllerType=0 controllerNumber=1 scan=11502	35.0053
09069:3	3	R.NFPPSQDASGDLYTTSSQLTLPATQC[+57.021]LAGK.S		C[+57]	1056.84	3	3168.52	3168.52	0	1.3	52	Specific	627.36	627.36	627.36	13.64	41	>sp|P01876|IGHA1_HUMAN Immunoglobulin heavy constant alpha 1 OS=Homo sapiens GN=IGHA1 PE=1 SV=2	11916	File384_Scan11392	controllerType=0 controllerNumber=1 scan=11392	34.7697
08461:3	3	R.NFPPSQDASGDLYTTSSQLTLPATQC[+57.021]LAGK.S		C[+57]	1056.85	3	3168.52	3168.52	0	2	52	Specific	629.15	629.15	629.15	13.64	41	>sp|P01876|IGHA1_HUMAN Immunoglobulin heavy constant alpha 1 OS=Homo sapiens GN=IGHA1 PE=1 SV=2	11916	File384_Scan10744	controllerType=0 controllerNumber=1 scan=10744	33.4457
08646:2	3	R.NFPPSQDASGDLYTTSSQLTLPATQC[+57.021]LAGK.S		C[+57]	1584.76	2	3168.52	3168.52	0	0.3	52	Specific	634.68	584.65	584.65	13.41	41	>sp|P01876|IGHA1_HUMAN Immunoglobulin heavy constant alpha 1 OS=Homo sapiens GN=IGHA1 PE=1 SV=2	11916	File384_Scan10945	controllerType=0 controllerNumber=1 scan=10945	33.8451
08965:3	3	R.NFPPSQDASGDLYTTSSQLTLPATQC[+57.021]LAGK.S		C[+57]	1056.85	3	3168.53	3168.52	0	3.9	52	Specific	675.45	675.45	675.45	13.29	41	>sp|P01876|IGHA1_HUMAN Immunoglobulin heavy constant alpha 1 OS=Homo sapiens GN=IGHA1 PE=1 SV=2	11916	File384_Scan11283	controllerType=0 controllerNumber=1 scan=11283	34.5366
08541:2	3	R.NFPPSQDASGDLYTTSSQLTLPATQC[+57.021]LAGK.S		C[+57]	1584.76	2	3168.5	3168.52	0	-3.8	52	Specific	685.57	656.32	656.32	12.96	41	>sp|P01876|IGHA1_HUMAN Immunoglobulin heavy constant alpha 1 OS=Homo sapiens GN=IGHA1 PE=1 SV=2	11916	File384_Scan10829	controllerType=0 controllerNumber=1 scan=10829	33.6144
08673:4	3	R.NFPPSQDASGDLYTTSSQLTLPATQC[+57.021]LAGK.S		C[+57]	792.885	4	3168.52	3168.52	0	1.4	52	Specific	687.57	687.57	687.57	14.13	41	>sp|P01876|IGHA1_HUMAN Immunoglobulin heavy constant alpha 1 OS=Homo sapiens GN=IGHA1 PE=1 SV=2	11916	File384_Scan10973	controllerType=0 controllerNumber=1 scan=10973	33.903
08550:3	3	R.NFPPSQDASGDLYTTSSQLTLPATQC[+57.021]LAGK.S		C[+57]	1056.84	3	3168.51	3168.52	0	-2.2	52	Specific	711.08	710.7	710.7	14.67	41	>sp|P01876|IGHA1_HUMAN Immunoglobulin heavy constant alpha 1 OS=Homo sapiens GN=IGHA1 PE=1 SV=2	11916	File384_Scan10840	controllerType=0 controllerNumber=1 scan=10840	33.6345
08666:3	3	R.NFPPSQDASGDLYTTSSQLTLPATQC[+57.021]LAGK.S		C[+57]	1056.85	3	3168.52	3168.52	0	2.5	52	Specific	728.11	728.11	728.11	15.14	41	>sp|P01876|IGHA1_HUMAN Immunoglobulin heavy constant alpha 1 OS=Homo sapiens GN=IGHA1 PE=1 SV=2	11916	File384_Scan10966	controllerType=0 controllerNumber=1 scan=10966	33.8884
08864:3	3	R.NFPPSQDASGDLYTTSSQLTLPATQC[+57.021]LAGK.S		C[+57]	1056.85	3	3168.53	3168.52	0	4.9	52	Specific	753.49	753.49	753.49	15.19	41	>sp|P01876|IGHA1_HUMAN Immunoglobulin heavy constant alpha 1 OS=Homo sapiens GN=IGHA1 PE=1 SV=2	11916	File384_Scan11177	controllerType=0 controllerNumber=1 scan=11177	34.3121
08765:3	3	R.NFPPSQDASGDLYTTSSQLTLPATQC[+57.021]LAGK.S		C[+57]	1056.85	3	3168.53	3168.52	0	5.5	52	Specific	759.37	759.37	759.37	14.69	41	>sp|P01876|IGHA1_HUMAN Immunoglobulin heavy constant alpha 1 OS=Homo sapiens GN=IGHA1 PE=1 SV=2	11916	File384_Scan11071	controllerType=0 controllerNumber=1 scan=11071	34.0957
11599:4	3	R.LSLHRPALEDLLLGSEAN[+2026.687]LTC[+57.021]TLTGLR.D	HexNAc(2)Hex(10)	C[+57], N[+2027]	1248.33	4	4990.28	4990.29	0	-1.1	127	Specific	74.01	32.41	32.41	2.31	41	>sp|P01876|IGHA1_HUMAN Immunoglobulin heavy constant alpha 1 OS=Homo sapiens GN=IGHA1 PE=1 SV=2	11916	File384_Scan14084	controllerType=0 controllerNumber=1 scan=14084	40.4963
11509:4	3	R.LSLHRPALEDLLLGSEAN[+1768.640]LTC[+57.021]TLTGLR.D	HexNAc(4)Hex(5)Fuc(1)	C[+57], N[+1769]	1183.56	4	4731.21	4732.24	-1	-4.3	127	Specific	108.58	108.58	71.14	3.42	41	>sp|P01876|IGHA1_HUMAN Immunoglobulin heavy constant alpha 1 OS=Homo sapiens GN=IGHA1 PE=1 SV=2	11916	File384_Scan13978	controllerType=0 controllerNumber=1 scan=13978	40.2111
11869:4	3	R.LSLHRPALEDLLLGSEAN[+1970.698]LTC[+57.021]TLTGLR.D	HexNAc(5)Hex(4)NeuGc(1)	C[+57], N[+1971]	1234.08	4	4933.28	4934.3	-1	-3	127	Specific	119.14	110.8	110.8	2.48	41	>sp|P01876|IGHA1_HUMAN Immunoglobulin heavy constant alpha 1 OS=Homo sapiens GN=IGHA1 PE=1 SV=2	11916	File384_Scan14417	controllerType=0 controllerNumber=1 scan=14417	41.3108
11711:4	3	R.LSLHRPALEDLLLGSEAN[+1954.704]LTC[+57.021]TLTGLR.D	HexNAc(5)Hex(4)NeuAc(1)	C[+57], N[+1955]	1230.33	4	4918.3	4918.3	0	0.5	127	Specific	148.5	100.09	46.57	4.77	41	>sp|P01876|IGHA1_HUMAN Immunoglobulin heavy constant alpha 1 OS=Homo sapiens GN=IGHA1 PE=1 SV=2	11916	File384_Scan14229	controllerType=0 controllerNumber=1 scan=14229	40.8741
11815:4	3	R.LSLHRPALEDLLLGSEAN[+1930.692]LTC[+57.021]TLTGLR.D	HexNAc(4)Hex(6)Fuc(1)	C[+57], N[+1931]	1224.07	4	4893.27	4894.29	-1	-2.8	127	Specific	164.69	127.08	74.52	4.61	41	>sp|P01876|IGHA1_HUMAN Immunoglobulin heavy constant alpha 1 OS=Homo sapiens GN=IGHA1 PE=1 SV=2	11916	File384_Scan14351	controllerType=0 controllerNumber=1 scan=14351	41.1572
11712:4	3	R.LSLHRPALEDLLLGSEAN[+1970.698]LTC[+57.021]TLTGLR.D	HexNAc(5)Hex(4)NeuGc(1)	C[+57], N[+1971]	1234.07	4	4933.27	4934.3	-1	-5.2	127	Specific	166.25	159.81	159.81	4.61	41	>sp|P01876|IGHA1_HUMAN Immunoglobulin heavy constant alpha 1 OS=Homo sapiens GN=IGHA1 PE=1 SV=2	11916	File384_Scan14230	controllerType=0 controllerNumber=1 scan=14230	40.8785
11616:5	3	R.LSLHRPALEDLLLGSEAN[+1913.677]LTC[+57.021]TLTGLR.D	HexNAc(4)Hex(5)NeuAc(1)	C[+57], N[+1914]	976.262	5	4877.28	4877.28	0	0.9	127	Specific	204.18	204.18	47.1	6.18	41	>sp|P01876|IGHA1_HUMAN Immunoglobulin heavy constant alpha 1 OS=Homo sapiens GN=IGHA1 PE=1 SV=2	11916	File384_Scan14110	controllerType=0 controllerNumber=1 scan=14110	40.5644
11620:3	3	R.LSLHRPALEDLLLGSEAN[+1913.677]LTC[+57.021]TLTGLR.D	HexNAc(4)Hex(5)NeuAc(1)	C[+57], N[+1914]	1626.44	3	4877.29	4877.28	0	3.1	127	Specific	273.13	191.69	30.56	5.52	41	>sp|P01876|IGHA1_HUMAN Immunoglobulin heavy constant alpha 1 OS=Homo sapiens GN=IGHA1 PE=1 SV=2	11916	File384_Scan14115	controllerType=0 controllerNumber=1 scan=14115	40.5783
11435:4	3	R.LSLHRPALEDLLLGSEAN[+1930.692]LTC[+57.021]TLTGLR.D	HexNAc(4)Hex(6)Fuc(1)	C[+57], N[+1931]	1224.08	4	4893.3	4894.29	-1	2.3	127	Specific	303.57	264.26	89.55	7.63	41	>sp|P01876|IGHA1_HUMAN Immunoglobulin heavy constant alpha 1 OS=Homo sapiens GN=IGHA1 PE=1 SV=2	11916	File384_Scan13893	controllerType=0 controllerNumber=1 scan=13893	39.9925
11729:4	3	R.LSLHRPALEDLLLGSEAN[+1913.677]LTC[+57.021]TLTGLR.D	HexNAc(4)Hex(5)NeuAc(1)	C[+57], N[+1914]	1220.08	4	4877.29	4877.28	0	2.2	127	Specific	327.89	310.96	39.04	7.67	41	>sp|P01876|IGHA1_HUMAN Immunoglobulin heavy constant alpha 1 OS=Homo sapiens GN=IGHA1 PE=1 SV=2	11916	File384_Scan14248	controllerType=0 controllerNumber=1 scan=14248	40.9263
11714:4	3	R.LSLHRPALEDLLLGSEAN[+1970.698]LTC[+57.021]TLTGLR.D	HexNAc(5)Hex(4)NeuGc(1)	C[+57], N[+1971]	1234.07	4	4933.27	4934.3	-1	-5.2	127	Specific	399.43	275.02	275.02	7.24	41	>sp|P01876|IGHA1_HUMAN Immunoglobulin heavy constant alpha 1 OS=Homo sapiens GN=IGHA1 PE=1 SV=2	11916	File384_Scan14232	controllerType=0 controllerNumber=1 scan=14232	40.8854
11662:4	3	R.LSLHRPALEDLLLGSEAN[+1971.719]LTC[+57.021]TLTGLR.D	HexNAc(5)Hex(5)Fuc(1)	C[+57], N[+1972]	1234.33	4	4934.29	4935.32	-1	-5.1	127	Specific	439.79	397.73	71.14	8.96	41	>sp|P01876|IGHA1_HUMAN Immunoglobulin heavy constant alpha 1 OS=Homo sapiens GN=IGHA1 PE=1 SV=2	11916	File384_Scan14168	controllerType=0 controllerNumber=1 scan=14168	40.7167
11686:4	3	R.LSLHRPALEDLLLGSEAN[+1751.624]LTC[+57.021]TLTGLR.D	HexNAc(4)Hex(4)NeuAc(1)	C[+57], N[+1752]	1179.56	4	4715.23	4715.22	0	1.5	127	Specific	506.35	451.75	48.69	10.62	41	>sp|P01876|IGHA1_HUMAN Immunoglobulin heavy constant alpha 1 OS=Homo sapiens GN=IGHA1 PE=1 SV=2	11916	File384_Scan14199	controllerType=0 controllerNumber=1 scan=14199	40.7995
11731:4	3	R.LSLHRPALEDLLLGSEAN[+1913.677]LTC[+57.021]TLTGLR.D	HexNAc(4)Hex(5)NeuAc(1)	C[+57], N[+1914]	1220.08	4	4877.29	4877.28	0	2.2	127	Specific	609.96	469.13	55.21	12.61	41	>sp|P01876|IGHA1_HUMAN Immunoglobulin heavy constant alpha 1 OS=Homo sapiens GN=IGHA1 PE=1 SV=2	11916	File384_Scan14250	controllerType=0 controllerNumber=1 scan=14250	40.9343
11618:5	3	R.LSLHRPALEDLLLGSEAN[+1913.677]LTC[+57.021]TLTGLR.D	HexNAc(4)Hex(5)NeuAc(1)	C[+57], N[+1914]	976.262	5	4877.28	4877.28	0	0.9	127	Specific	612.68	345.6	56	11.62	41	>sp|P01876|IGHA1_HUMAN Immunoglobulin heavy constant alpha 1 OS=Homo sapiens GN=IGHA1 PE=1 SV=2	11916	File384_Scan14112	controllerType=0 controllerNumber=1 scan=14112	40.5686
11663:4	3	R.LSLHRPALEDLLLGSEAN[+1971.719]LTC[+57.021]TLTGLR.D	HexNAc(5)Hex(5)Fuc(1)	C[+57], N[+1972]	1234.33	4	4934.29	4935.32	-1	-5.1	127	Specific	627.71	393.87	71.14	11.88	41	>sp|P01876|IGHA1_HUMAN Immunoglobulin heavy constant alpha 1 OS=Homo sapiens GN=IGHA1 PE=1 SV=2	11916	File384_Scan14170	controllerType=0 controllerNumber=1 scan=14170	40.7245
11120:4	3	R.LSLHRPALEDLLLGSEAN[+1501.555]LTC[+57.021]TLTGLR.D	HexNAc(5)Hex(3)	C[+57], N[+1502]	1117.05	4	4465.16	4465.15	0	1.1	127	Specific	702.73	606.11	606.11	14.98	41	>sp|P01876|IGHA1_HUMAN Immunoglobulin heavy constant alpha 1 OS=Homo sapiens GN=IGHA1 PE=1 SV=2	11916	File384_Scan13558	controllerType=0 controllerNumber=1 scan=13558	39.2344
11713:4	3	R.LSLHRPALEDLLLGSEAN[+1954.704]LTC[+57.021]TLTGLR.D	HexNAc(5)Hex(4)NeuAc(1)	C[+57], N[+1955]	1230.33	4	4918.3	4918.3	0	0.5	127	Specific	714.95	417.5	81.57	14.98	41	>sp|P01876|IGHA1_HUMAN Immunoglobulin heavy constant alpha 1 OS=Homo sapiens GN=IGHA1 PE=1 SV=2	11916	File384_Scan14231	controllerType=0 controllerNumber=1 scan=14231	40.8809
11687:4	3	R.LSLHRPALEDLLLGSEAN[+1751.624]LTC[+57.021]TLTGLR.D	HexNAc(4)Hex(4)NeuAc(1)	C[+57], N[+1752]	1179.56	4	4715.23	4715.22	0	1.5	127	Specific	723.72	404.87	73.79	15.12	41	>sp|P01876|IGHA1_HUMAN Immunoglobulin heavy constant alpha 1 OS=Homo sapiens GN=IGHA1 PE=1 SV=2	11916	File384_Scan14201	controllerType=0 controllerNumber=1 scan=14201	40.8067
11595:4	3	R.LSLHRPALEDLLLGSEAN[+1913.677]LTC[+57.021]TLTGLR.D	HexNAc(4)Hex(5)NeuAc(1)	C[+57], N[+1914]	1220.08	4	4877.29	4877.28	0	3.4	127	Specific	731.49	618.5	39.18	13.77	41	>sp|P01876|IGHA1_HUMAN Immunoglobulin heavy constant alpha 1 OS=Homo sapiens GN=IGHA1 PE=1 SV=2	11916	File384_Scan14078	controllerType=0 controllerNumber=1 scan=14078	40.4792
11122:4	3	R.LSLHRPALEDLLLGSEAN[+1501.555]LTC[+57.021]TLTGLR.D	HexNAc(5)Hex(3)	C[+57], N[+1502]	1117.05	4	4465.16	4465.15	0	1.1	127	Specific	762.81	481.84	481.84	15.98	41	>sp|P01876|IGHA1_HUMAN Immunoglobulin heavy constant alpha 1 OS=Homo sapiens GN=IGHA1 PE=1 SV=2	11916	File384_Scan13560	controllerType=0 controllerNumber=1 scan=13560	39.2393
11596:4	3	R.LSLHRPALEDLLLGSEAN[+1913.677]LTC[+57.021]TLTGLR.D	HexNAc(4)Hex(5)NeuAc(1)	C[+57], N[+1914]	1220.08	4	4877.29	4877.28	0	3.4	127	Specific	771.16	624.35	76.81	14.77	41	>sp|P01876|IGHA1_HUMAN Immunoglobulin heavy constant alpha 1 OS=Homo sapiens GN=IGHA1 PE=1 SV=2	11916	File384_Scan14080	controllerType=0 controllerNumber=1 scan=14080	40.4844
11347:2	3	R.DASGVTFTWTPSSGK.S			770.867	2	1540.73	1540.73	0	-1.1	154	Specific	9.95	9.95	9.95	0.52	41	>sp|P01876|IGHA1_HUMAN Immunoglobulin heavy constant alpha 1 OS=Homo sapiens GN=IGHA1 PE=1 SV=2	11916	File384_Scan13795	controllerType=0 controllerNumber=1 scan=13795	39.7537
06568:2	3	R.DASGVTFTWTPSSGK.S			770.868	2	1540.73	1540.73	0	0.2	154	Specific	529.5	450	450	9.96	41	>sp|P01876|IGHA1_HUMAN Immunoglobulin heavy constant alpha 1 OS=Homo sapiens GN=IGHA1 PE=1 SV=2	11916	File384_Scan8756	controllerType=0 controllerNumber=1 scan=8756	29.3892
07110:2	3	R.DASGVTFTWTPSSGK.S			770.868	2	1540.73	1540.73	0	0.5	154	Specific	567.36	420.72	420.72	10.29	41	>sp|P01876|IGHA1_HUMAN Immunoglobulin heavy constant alpha 1 OS=Homo sapiens GN=IGHA1 PE=1 SV=2	11916	File384_Scan9324	controllerType=0 controllerNumber=1 scan=9324	30.554
06987:2	3	R.DASGVTFTWTPSSGK.S			770.868	2	1540.73	1540.73	0	0.5	154	Specific	655.56	493.45	493.45	13.4	41	>sp|P01876|IGHA1_HUMAN Immunoglobulin heavy constant alpha 1 OS=Homo sapiens GN=IGHA1 PE=1 SV=2	11916	File384_Scan9196	controllerType=0 controllerNumber=1 scan=9196	30.2806
06884:2	3	R.DASGVTFTWTPSSGK.S			770.868	2	1540.73	1540.73	0	0.4	154	Specific	666.74	511.46	511.46	13.4	41	>sp|P01876|IGHA1_HUMAN Immunoglobulin heavy constant alpha 1 OS=Homo sapiens GN=IGHA1 PE=1 SV=2	11916	File384_Scan9088	controllerType=0 controllerNumber=1 scan=9088	30.06
06678:2	3	R.DASGVTFTWTPSSGK.S			770.866	2	1540.73	1540.73	0	-1.4	154	Specific	767.51	671.35	671.35	14.94	41	>sp|P01876|IGHA1_HUMAN Immunoglobulin heavy constant alpha 1 OS=Homo sapiens GN=IGHA1 PE=1 SV=2	11916	File384_Scan8872	controllerType=0 controllerNumber=1 scan=8872	29.6214
06782:2	3	R.DASGVTFTWTPSSGK.S			770.868	2	1540.73	1540.73	0	0.5	154	Specific	772.22	662.5	662.5	15.4	41	>sp|P01876|IGHA1_HUMAN Immunoglobulin heavy constant alpha 1 OS=Homo sapiens GN=IGHA1 PE=1 SV=2	11916	File384_Scan8981	controllerType=0 controllerNumber=1 scan=8981	29.8397
12815:2	3	K.SAVQGPPER.D			470.746	2	940.485	940.485	0	-0.1	169	Specific	67.05	67.05	67.05	1.67	41	>sp|P01876|IGHA1_HUMAN Immunoglobulin heavy constant alpha 1 OS=Homo sapiens GN=IGHA1 PE=1 SV=2	11916	File384_Scan15824	controllerType=0 controllerNumber=1 scan=15824	46.0216
12492:2	3	K.SAVQGPPER.D			470.746	2	940.485	940.485	0	0.4	169	Specific	71.57	71.57	71.57	1.79	41	>sp|P01876|IGHA1_HUMAN Immunoglobulin heavy constant alpha 1 OS=Homo sapiens GN=IGHA1 PE=1 SV=2	11916	File384_Scan15157	controllerType=0 controllerNumber=1 scan=15157	42.9482
13004:2	3	K.SAVQGPPER.D			470.746	2	940.485	940.485	0	0.2	169	Specific	105.8	73.54	73.54	1.87	41	>sp|P01876|IGHA1_HUMAN Immunoglobulin heavy constant alpha 1 OS=Homo sapiens GN=IGHA1 PE=1 SV=2	11916	File384_Scan16089	controllerType=0 controllerNumber=1 scan=16089	46.852
12937:2	3	K.SAVQGPPER.D			470.746	2	940.485	940.485	0	0.3	169	Specific	171.06	145.36	145.36	3.28	41	>sp|P01876|IGHA1_HUMAN Immunoglobulin heavy constant alpha 1 OS=Homo sapiens GN=IGHA1 PE=1 SV=2	11916	File384_Scan16011	controllerType=0 controllerNumber=1 scan=16011	46.6601
14080:2	3	K.SAVQGPPER.D			470.746	2	940.485	940.485	0	0.1	169	Specific	171.74	171.74	171.74	3.65	41	>sp|P01876|IGHA1_HUMAN Immunoglobulin heavy constant alpha 1 OS=Homo sapiens GN=IGHA1 PE=1 SV=2	11916	File384_Scan17507	controllerType=0 controllerNumber=1 scan=17507	51.1441
11091:2	3	K.SAVQGPPER.D			470.746	2	940.484	940.485	0	-0.5	169	Specific	180.51	180.51	180.51	3.69	41	>sp|P01876|IGHA1_HUMAN Immunoglobulin heavy constant alpha 1 OS=Homo sapiens GN=IGHA1 PE=1 SV=2	11916	File384_Scan13527	controllerType=0 controllerNumber=1 scan=13527	39.1703
14083:2	3	K.SAVQGPPER.D			470.746	2	940.485	940.485	0	-0.1	169	Specific	199.5	153.47	153.47	3.51	41	>sp|P01876|IGHA1_HUMAN Immunoglobulin heavy constant alpha 1 OS=Homo sapiens GN=IGHA1 PE=1 SV=2	11916	File384_Scan17531	controllerType=0 controllerNumber=1 scan=17531	51.3129
14086:2	3	K.SAVQGPPER.D			470.746	2	940.485	940.485	0	0.1	169	Specific	205.18	188.65	188.65	4.42	41	>sp|P01876|IGHA1_HUMAN Immunoglobulin heavy constant alpha 1 OS=Homo sapiens GN=IGHA1 PE=1 SV=2	11916	File384_Scan17555	controllerType=0 controllerNumber=1 scan=17555	51.4818
14089:2	3	K.SAVQGPPER.D			470.746	2	940.485	940.485	0	-0.2	169	Specific	207.41	207.41	207.41	4.43	41	>sp|P01876|IGHA1_HUMAN Immunoglobulin heavy constant alpha 1 OS=Homo sapiens GN=IGHA1 PE=1 SV=2	11916	File384_Scan17579	controllerType=0 controllerNumber=1 scan=17579	51.6504
12017:2	3	K.SAVQGPPER.D			470.746	2	940.485	940.485	0	0.3	169	Specific	216.36	168.9	168.9	4.47	41	>sp|P01876|IGHA1_HUMAN Immunoglobulin heavy constant alpha 1 OS=Homo sapiens GN=IGHA1 PE=1 SV=2	11916	File384_Scan14589	controllerType=0 controllerNumber=1 scan=14589	41.6899
12423:2	3	K.SAVQGPPER.D			470.746	2	940.485	940.485	0	0	169	Specific	216.9	147.46	147.46	3.61	41	>sp|P01876|IGHA1_HUMAN Immunoglobulin heavy constant alpha 1 OS=Homo sapiens GN=IGHA1 PE=1 SV=2	11916	File384_Scan15075	controllerType=0 controllerNumber=1 scan=15075	42.7484
13124:2	3	K.SAVQGPPER.D			470.746	2	940.484	940.485	0	-0.5	169	Specific	219.63	159.76	159.76	3.61	41	>sp|P01876|IGHA1_HUMAN Immunoglobulin heavy constant alpha 1 OS=Homo sapiens GN=IGHA1 PE=1 SV=2	11916	File384_Scan16235	controllerType=0 controllerNumber=1 scan=16235	47.2438
02185:2	3	K.SAVQGPPER.D			470.746	2	940.485	940.485	0	0.4	169	Specific	233.31	130.2	130.2	3.49	41	>sp|P01876|IGHA1_HUMAN Immunoglobulin heavy constant alpha 1 OS=Homo sapiens GN=IGHA1 PE=1 SV=2	11916	File384_Scan3944	controllerType=0 controllerNumber=1 scan=3944	18.1674
14070:2	3	K.SAVQGPPER.D			470.746	2	940.485	940.485	0	-0.1	169	Specific	240.21	240.21	240.21	5.76	41	>sp|P01876|IGHA1_HUMAN Immunoglobulin heavy constant alpha 1 OS=Homo sapiens GN=IGHA1 PE=1 SV=2	11916	File384_Scan17455	controllerType=0 controllerNumber=1 scan=17455	50.8035
14092:2	3	K.SAVQGPPER.D			470.746	2	940.485	940.485	0	0.3	169	Specific	248.64	139.42	139.42	5.06	41	>sp|P01876|IGHA1_HUMAN Immunoglobulin heavy constant alpha 1 OS=Homo sapiens GN=IGHA1 PE=1 SV=2	11916	File384_Scan17605	controllerType=0 controllerNumber=1 scan=17605	51.835
14075:2	3	K.SAVQGPPER.D			470.746	2	940.485	940.485	0	-0.1	169	Specific	256.47	132.18	132.18	5.05	41	>sp|P01876|IGHA1_HUMAN Immunoglobulin heavy constant alpha 1 OS=Homo sapiens GN=IGHA1 PE=1 SV=2	11916	File384_Scan17481	controllerType=0 controllerNumber=1 scan=17481	50.9739
13377:2	3	K.SAVQGPPER.D			470.746	2	940.485	940.485	0	0.1	169	Specific	262.65	141.33	141.33	5.66	41	>sp|P01876|IGHA1_HUMAN Immunoglobulin heavy constant alpha 1 OS=Homo sapiens GN=IGHA1 PE=1 SV=2	11916	File384_Scan16520	controllerType=0 controllerNumber=1 scan=16520	47.9061
10623:2	3	K.SAVQGPPER.D			470.746	2	940.485	940.485	0	0.3	169	Specific	273.57	147.63	147.63	6.55	41	>sp|P01876|IGHA1_HUMAN Immunoglobulin heavy constant alpha 1 OS=Homo sapiens GN=IGHA1 PE=1 SV=2	11916	File384_Scan13034	controllerType=0 controllerNumber=1 scan=13034	38.194
00098:2	3	K.SAVQGPPER.D			470.746	2	940.485	940.485	0	0.2	169	Specific	283.12	202.23	202.23	5.88	41	>sp|P01876|IGHA1_HUMAN Immunoglobulin heavy constant alpha 1 OS=Homo sapiens GN=IGHA1 PE=1 SV=2	11916	File384_Scan1757	controllerType=0 controllerNumber=1 scan=1757	13.4167
13249:2	3	K.SAVQGPPER.D			470.746	2	940.484	940.485	0	-0.6	169	Specific	292.29	126.75	126.75	6.12	41	>sp|P01876|IGHA1_HUMAN Immunoglobulin heavy constant alpha 1 OS=Homo sapiens GN=IGHA1 PE=1 SV=2	11916	File384_Scan16384	controllerType=0 controllerNumber=1 scan=16384	47.6256
13491:2	3	K.SAVQGPPER.D			470.746	2	940.484	940.485	0	-0.6	169	Specific	294.3	187.87	187.87	6.01	41	>sp|P01876|IGHA1_HUMAN Immunoglobulin heavy constant alpha 1 OS=Homo sapiens GN=IGHA1 PE=1 SV=2	11916	File384_Scan16640	controllerType=0 controllerNumber=1 scan=16640	48.1567
01528:2	3	K.SAVQGPPER.D			470.745	2	940.484	940.485	0	-0.9	169	Specific	296.22	87.75	87.75	3.41	41	>sp|P01876|IGHA1_HUMAN Immunoglobulin heavy constant alpha 1 OS=Homo sapiens GN=IGHA1 PE=1 SV=2	11916	File384_Scan3255	controllerType=0 controllerNumber=1 scan=3255	16.7197
11377:2	3	K.SAVQGPPER.D			470.746	2	940.485	940.485	0	0.1	169	Specific	300.05	176.76	176.76	7.04	41	>sp|P01876|IGHA1_HUMAN Immunoglobulin heavy constant alpha 1 OS=Homo sapiens GN=IGHA1 PE=1 SV=2	11916	File384_Scan13828	controllerType=0 controllerNumber=1 scan=13828	39.832
14031:2	3	K.SAVQGPPER.D			470.746	2	940.485	940.485	0	0	169	Specific	308.25	180.63	180.63	6.14	41	>sp|P01876|IGHA1_HUMAN Immunoglobulin heavy constant alpha 1 OS=Homo sapiens GN=IGHA1 PE=1 SV=2	11916	File384_Scan17334	controllerType=0 controllerNumber=1 scan=17334	50.1175
09953:2	3	K.SAVQGPPER.D			470.746	2	940.485	940.485	0	0.3	169	Specific	310.88	180.04	180.04	7.04	41	>sp|P01876|IGHA1_HUMAN Immunoglobulin heavy constant alpha 1 OS=Homo sapiens GN=IGHA1 PE=1 SV=2	11916	File384_Scan12325	controllerType=0 controllerNumber=1 scan=12325	36.7541
11748:2	3	K.SAVQGPPER.D			470.746	2	940.484	940.485	0	-0.5	169	Specific	311.49	180.56	180.56	6.82	41	>sp|P01876|IGHA1_HUMAN Immunoglobulin heavy constant alpha 1 OS=Homo sapiens GN=IGHA1 PE=1 SV=2	11916	File384_Scan14269	controllerType=0 controllerNumber=1 scan=14269	40.9819
13604:2	3	K.SAVQGPPER.D			470.746	2	940.485	940.485	0	0.2	169	Specific	311.79	198.95	198.95	6.08	41	>sp|P01876|IGHA1_HUMAN Immunoglobulin heavy constant alpha 1 OS=Homo sapiens GN=IGHA1 PE=1 SV=2	11916	File384_Scan16767	controllerType=0 controllerNumber=1 scan=16767	48.4259
02523:2	3	K.SAVQGPPER.D			470.745	2	940.482	940.485	0	-2.5	169	Specific	314.32	137.44	137.44	3.23	41	>sp|P01876|IGHA1_HUMAN Immunoglobulin heavy constant alpha 1 OS=Homo sapiens GN=IGHA1 PE=1 SV=2	11916	File384_Scan4296	controllerType=0 controllerNumber=1 scan=4296	18.9956
13174:2	3	K.SAVQGPPER.D			470.746	2	940.485	940.485	0	0.3	169	Specific	316.41	174.35	174.35	7.04	41	>sp|P01876|IGHA1_HUMAN Immunoglobulin heavy constant alpha 1 OS=Homo sapiens GN=IGHA1 PE=1 SV=2	11916	File384_Scan16299	controllerType=0 controllerNumber=1 scan=16299	47.4246
13857:2	3	K.SAVQGPPER.D			470.746	2	940.485	940.485	0	0	169	Specific	319.75	195.96	195.96	6.75	41	>sp|P01876|IGHA1_HUMAN Immunoglobulin heavy constant alpha 1 OS=Homo sapiens GN=IGHA1 PE=1 SV=2	11916	File384_Scan17052	controllerType=0 controllerNumber=1 scan=17052	49.0521
13705:2	3	K.SAVQGPPER.D			470.746	2	940.485	940.485	0	0.5	169	Specific	331.72	226.69	226.69	7.34	41	>sp|P01876|IGHA1_HUMAN Immunoglobulin heavy constant alpha 1 OS=Homo sapiens GN=IGHA1 PE=1 SV=2	11916	File384_Scan16875	controllerType=0 controllerNumber=1 scan=16875	48.6499
01690:2	3	K.SAVQGPPER.D			470.746	2	940.484	940.485	0	-0.3	169	Specific	338.97	115.18	115.18	4.64	41	>sp|P01876|IGHA1_HUMAN Immunoglobulin heavy constant alpha 1 OS=Homo sapiens GN=IGHA1 PE=1 SV=2	11916	File384_Scan3425	controllerType=0 controllerNumber=1 scan=3425	17.0662
09821:2	3	K.SAVQGPPER.D			470.746	2	940.485	940.485	0	0.2	169	Specific	342.34	220.61	220.61	7.48	41	>sp|P01876|IGHA1_HUMAN Immunoglobulin heavy constant alpha 1 OS=Homo sapiens GN=IGHA1 PE=1 SV=2	11916	File384_Scan12185	controllerType=0 controllerNumber=1 scan=12185	36.4525
14044:2	3	K.SAVQGPPER.D			470.746	2	940.484	940.485	0	-0.3	169	Specific	342.46	242.9	242.9	7.34	41	>sp|P01876|IGHA1_HUMAN Immunoglobulin heavy constant alpha 1 OS=Homo sapiens GN=IGHA1 PE=1 SV=2	11916	File384_Scan17367	controllerType=0 controllerNumber=1 scan=17367	50.2884
13785:2	3	K.SAVQGPPER.D			470.746	2	940.485	940.485	0	-0.1	169	Specific	343.59	220.88	220.88	7.26	41	>sp|P01876|IGHA1_HUMAN Immunoglobulin heavy constant alpha 1 OS=Homo sapiens GN=IGHA1 PE=1 SV=2	11916	File384_Scan16971	controllerType=0 controllerNumber=1 scan=16971	48.8624
03326:2	3	K.SAVQGPPER.D			470.746	2	940.485	940.485	0	0.8	169	Specific	349.57	180.53	180.53	5.74	41	>sp|P01876|IGHA1_HUMAN Immunoglobulin heavy constant alpha 1 OS=Homo sapiens GN=IGHA1 PE=1 SV=2	11916	File384_Scan5135	controllerType=0 controllerNumber=1 scan=5135	20.8714
13946:2	3	K.SAVQGPPER.D			470.746	2	940.485	940.485	0	-0.1	169	Specific	351.72	222.16	222.16	7.26	41	>sp|P01876|IGHA1_HUMAN Immunoglobulin heavy constant alpha 1 OS=Homo sapiens GN=IGHA1 PE=1 SV=2	11916	File384_Scan17171	controllerType=0 controllerNumber=1 scan=17171	49.4064
11920:2	3	K.SAVQGPPER.D			470.746	2	940.485	940.485	0	-0.1	169	Specific	352.35	212.39	212.39	7.21	41	>sp|P01876|IGHA1_HUMAN Immunoglobulin heavy constant alpha 1 OS=Homo sapiens GN=IGHA1 PE=1 SV=2	11916	File384_Scan14473	controllerType=0 controllerNumber=1 scan=14473	41.4377
05578:2	3	K.SAVQGPPER.D			470.746	2	940.485	940.485	0	0.5	169	Specific	353.35	206.09	206.09	5.9	41	>sp|P01876|IGHA1_HUMAN Immunoglobulin heavy constant alpha 1 OS=Homo sapiens GN=IGHA1 PE=1 SV=2	11916	File384_Scan7710	controllerType=0 controllerNumber=1 scan=7710	27.0209
14012:2	3	K.SAVQGPPER.D			470.746	2	940.485	940.485	0	0.1	169	Specific	354.85	224.53	224.53	7.48	41	>sp|P01876|IGHA1_HUMAN Immunoglobulin heavy constant alpha 1 OS=Homo sapiens GN=IGHA1 PE=1 SV=2	11916	File384_Scan17295	controllerType=0 controllerNumber=1 scan=17295	49.9436
11831:2	3	K.SAVQGPPER.D			470.746	2	940.486	940.485	0	0.9	169	Specific	356.55	231.2	231.2	7.48	41	>sp|P01876|IGHA1_HUMAN Immunoglobulin heavy constant alpha 1 OS=Homo sapiens GN=IGHA1 PE=1 SV=2	11916	File384_Scan14371	controllerType=0 controllerNumber=1 scan=14371	41.2016
13913:2	3	K.SAVQGPPER.D			470.746	2	940.485	940.485	0	0.2	169	Specific	357.09	228.38	228.38	7.48	41	>sp|P01876|IGHA1_HUMAN Immunoglobulin heavy constant alpha 1 OS=Homo sapiens GN=IGHA1 PE=1 SV=2	11916	File384_Scan17121	controllerType=0 controllerNumber=1 scan=17121	49.2375
02794:2	3	K.SAVQGPPER.D			470.746	2	940.484	940.485	0	-0.6	169	Specific	359.26	189.35	189.35	5.42	41	>sp|P01876|IGHA1_HUMAN Immunoglobulin heavy constant alpha 1 OS=Homo sapiens GN=IGHA1 PE=1 SV=2	11916	File384_Scan4579	controllerType=0 controllerNumber=1 scan=4579	19.6359
02748:2	3	K.SAVQGPPER.D			470.746	2	940.484	940.485	0	-0.3	169	Specific	359.61	204.82	204.82	5.32	41	>sp|P01876|IGHA1_HUMAN Immunoglobulin heavy constant alpha 1 OS=Homo sapiens GN=IGHA1 PE=1 SV=2	11916	File384_Scan4531	controllerType=0 controllerNumber=1 scan=4531	19.5221
13974:2	3	K.SAVQGPPER.D			470.746	2	940.485	940.485	0	0.4	169	Specific	361.35	229.58	229.58	7.71	41	>sp|P01876|IGHA1_HUMAN Immunoglobulin heavy constant alpha 1 OS=Homo sapiens GN=IGHA1 PE=1 SV=2	11916	File384_Scan17217	controllerType=0 controllerNumber=1 scan=17217	49.5854
14056:2	3	K.SAVQGPPER.D			470.746	2	940.485	940.485	0	-0.1	169	Specific	362.77	233.6	233.6	7.49	41	>sp|P01876|IGHA1_HUMAN Immunoglobulin heavy constant alpha 1 OS=Homo sapiens GN=IGHA1 PE=1 SV=2	11916	File384_Scan17399	controllerType=0 controllerNumber=1 scan=17399	50.4586
03458:2	3	K.SAVQGPPER.D			470.746	2	940.485	940.485	0	0.3	169	Specific	363.6	162.91	162.91	5.6	41	>sp|P01876|IGHA1_HUMAN Immunoglobulin heavy constant alpha 1 OS=Homo sapiens GN=IGHA1 PE=1 SV=2	11916	File384_Scan5273	controllerType=0 controllerNumber=1 scan=5273	21.1834
02313:2	3	K.SAVQGPPER.D			470.746	2	940.484	940.485	0	-0.8	169	Specific	364.65	144.5	144.5	5.43	41	>sp|P01876|IGHA1_HUMAN Immunoglobulin heavy constant alpha 1 OS=Homo sapiens GN=IGHA1 PE=1 SV=2	11916	File384_Scan4077	controllerType=0 controllerNumber=1 scan=4077	18.4985
13992:2	3	K.SAVQGPPER.D			470.746	2	940.485	940.485	0	0.1	169	Specific	370.88	244.94	244.94	7.79	41	>sp|P01876|IGHA1_HUMAN Immunoglobulin heavy constant alpha 1 OS=Homo sapiens GN=IGHA1 PE=1 SV=2	11916	File384_Scan17255	controllerType=0 controllerNumber=1 scan=17255	49.7618
03693:2	3	K.SAVQGPPER.D			470.745	2	940.484	940.485	0	-0.9	169	Specific	372.76	194.54	194.54	5.94	41	>sp|P01876|IGHA1_HUMAN Immunoglobulin heavy constant alpha 1 OS=Homo sapiens GN=IGHA1 PE=1 SV=2	11916	File384_Scan5531	controllerType=0 controllerNumber=1 scan=5531	21.7286
14064:2	3	K.SAVQGPPER.D			470.746	2	940.485	940.485	0	-0.1	169	Specific	375.86	236.48	236.48	7.49	41	>sp|P01876|IGHA1_HUMAN Immunoglobulin heavy constant alpha 1 OS=Homo sapiens GN=IGHA1 PE=1 SV=2	11916	File384_Scan17428	controllerType=0 controllerNumber=1 scan=17428	50.6325
01735:2	3	K.SAVQGPPER.D			470.746	2	940.485	940.485	0	0	169	Specific	385.04	198.3	198.3	5.91	41	>sp|P01876|IGHA1_HUMAN Immunoglobulin heavy constant alpha 1 OS=Homo sapiens GN=IGHA1 PE=1 SV=2	11916	File384_Scan3472	controllerType=0 controllerNumber=1 scan=3472	17.162
02859:2	3	K.SAVQGPPER.D			470.746	2	940.485	940.485	0	-0.1	169	Specific	389.27	214.39	214.39	6.35	41	>sp|P01876|IGHA1_HUMAN Immunoglobulin heavy constant alpha 1 OS=Homo sapiens GN=IGHA1 PE=1 SV=2	11916	File384_Scan4647	controllerType=0 controllerNumber=1 scan=4647	19.7862
03216:2	3	K.SAVQGPPER.D			470.746	2	940.484	940.485	0	-0.5	169	Specific	393.81	217.76	217.76	5.88	41	>sp|P01876|IGHA1_HUMAN Immunoglobulin heavy constant alpha 1 OS=Homo sapiens GN=IGHA1 PE=1 SV=2	11916	File384_Scan5020	controllerType=0 controllerNumber=1 scan=5020	20.6333
03566:2	3	K.SAVQGPPER.D			470.746	2	940.485	940.485	0	0	169	Specific	394.91	214.06	214.06	6.14	41	>sp|P01876|IGHA1_HUMAN Immunoglobulin heavy constant alpha 1 OS=Homo sapiens GN=IGHA1 PE=1 SV=2	11916	File384_Scan5390	controllerType=0 controllerNumber=1 scan=5390	21.435
03102:2	3	K.SAVQGPPER.D			470.746	2	940.485	940.485	0	0.3	169	Specific	399.04	220.19	220.19	6.46	41	>sp|P01876|IGHA1_HUMAN Immunoglobulin heavy constant alpha 1 OS=Homo sapiens GN=IGHA1 PE=1 SV=2	11916	File384_Scan4901	controllerType=0 controllerNumber=1 scan=4901	20.3763
00541:2	3	K.SAVQGPPER.D			470.746	2	940.484	940.485	0	-0.3	169	Specific	412.5	265.29	265.29	7.14	41	>sp|P01876|IGHA1_HUMAN Immunoglobulin heavy constant alpha 1 OS=Homo sapiens GN=IGHA1 PE=1 SV=2	11916	File384_Scan2220	controllerType=0 controllerNumber=1 scan=2220	14.487
02970:2	3	K.SAVQGPPER.D			470.746	2	940.484	940.485	0	-0.6	169	Specific	416.82	230.62	230.62	6.61	41	>sp|P01876|IGHA1_HUMAN Immunoglobulin heavy constant alpha 1 OS=Homo sapiens GN=IGHA1 PE=1 SV=2	11916	File384_Scan4763	controllerType=0 controllerNumber=1 scan=4763	20.0671
01631:2	3	K.SAVQGPPER.D			470.746	2	940.485	940.485	0	0	169	Specific	416.98	165.29	165.29	6.76	41	>sp|P01876|IGHA1_HUMAN Immunoglobulin heavy constant alpha 1 OS=Homo sapiens GN=IGHA1 PE=1 SV=2	11916	File384_Scan3363	controllerType=0 controllerNumber=1 scan=3363	16.9383
02083:2	3	K.SAVQGPPER.D			470.746	2	940.485	940.485	0	0.3	169	Specific	423.43	204.91	204.91	6.87	41	>sp|P01876|IGHA1_HUMAN Immunoglobulin heavy constant alpha 1 OS=Homo sapiens GN=IGHA1 PE=1 SV=2	11916	File384_Scan3837	controllerType=0 controllerNumber=1 scan=3837	17.9258
01973:2	3	K.SAVQGPPER.D			470.746	2	940.485	940.485	0	0.1	169	Specific	436.3	187.05	187.05	6.39	41	>sp|P01876|IGHA1_HUMAN Immunoglobulin heavy constant alpha 1 OS=Homo sapiens GN=IGHA1 PE=1 SV=2	11916	File384_Scan3722	controllerType=0 controllerNumber=1 scan=3722	17.6777
01405:2	3	K.SAVQGPPER.D			470.746	2	940.485	940.485	0	0.3	169	Specific	436.92	174.55	174.55	6.61	41	>sp|P01876|IGHA1_HUMAN Immunoglobulin heavy constant alpha 1 OS=Homo sapiens GN=IGHA1 PE=1 SV=2	11916	File384_Scan3124	controllerType=0 controllerNumber=1 scan=3124	16.4541
01303:2	3	K.SAVQGPPER.D			470.746	2	940.485	940.485	0	0.3	169	Specific	459.77	231.83	231.83	7.15	41	>sp|P01876|IGHA1_HUMAN Immunoglobulin heavy constant alpha 1 OS=Homo sapiens GN=IGHA1 PE=1 SV=2	11916	File384_Scan3017	controllerType=0 controllerNumber=1 scan=3017	16.2389
01873:2	3	K.SAVQGPPER.D			470.746	2	940.485	940.485	0	-0.1	169	Specific	500.56	234.23	234.23	7.24	41	>sp|P01876|IGHA1_HUMAN Immunoglobulin heavy constant alpha 1 OS=Homo sapiens GN=IGHA1 PE=1 SV=2	11916	File384_Scan3617	controllerType=0 controllerNumber=1 scan=3617	17.4568
01201:2	3	K.SAVQGPPER.D			470.746	2	940.485	940.485	0	0.1	169	Specific	508.91	231.2	231.2	8.14	41	>sp|P01876|IGHA1_HUMAN Immunoglobulin heavy constant alpha 1 OS=Homo sapiens GN=IGHA1 PE=1 SV=2	11916	File384_Scan2910	controllerType=0 controllerNumber=1 scan=2910	16.0258
00744:2	3	K.SAVQGPPER.D			470.747	2	940.486	940.485	0	1.1	169	Specific	528.02	248.7	248.7	8.44	41	>sp|P01876|IGHA1_HUMAN Immunoglobulin heavy constant alpha 1 OS=Homo sapiens GN=IGHA1 PE=1 SV=2	11916	File384_Scan2432	controllerType=0 controllerNumber=1 scan=2432	14.9809
00874:2	3	K.SAVQGPPER.D			470.746	2	940.485	940.485	0	0.1	169	Specific	534.62	242	242	7.4	41	>sp|P01876|IGHA1_HUMAN Immunoglobulin heavy constant alpha 1 OS=Homo sapiens GN=IGHA1 PE=1 SV=2	11916	File384_Scan2568	controllerType=0 controllerNumber=1 scan=2568	15.2898
01095:2	3	K.SAVQGPPER.D			470.746	2	940.485	940.485	0	0.3	169	Specific	541.02	237.03	237.03	7.56	41	>sp|P01876|IGHA1_HUMAN Immunoglobulin heavy constant alpha 1 OS=Homo sapiens GN=IGHA1 PE=1 SV=2	11916	File384_Scan2799	controllerType=0 controllerNumber=1 scan=2799	15.786
00767:2	3	K.SAVQGPPER.D			470.746	2	940.484	940.485	0	-0.6	169	Specific	561.92	267.19	267.19	8.47	41	>sp|P01876|IGHA1_HUMAN Immunoglobulin heavy constant alpha 1 OS=Homo sapiens GN=IGHA1 PE=1 SV=2	11916	File384_Scan2456	controllerType=0 controllerNumber=1 scan=2456	15.0476
00982:2	3	K.SAVQGPPER.D			470.746	2	940.485	940.485	0	-0.1	169	Specific	589.15	299.34	299.34	9.56	41	>sp|P01876|IGHA1_HUMAN Immunoglobulin heavy constant alpha 1 OS=Homo sapiens GN=IGHA1 PE=1 SV=2	11916	File384_Scan2681	controllerType=0 controllerNumber=1 scan=2681	15.5212
00651:2	3	K.SAVQGPPER.D			470.746	2	940.485	940.485	0	0.3	169	Specific	607.05	287.86	287.86	10.78	41	>sp|P01876|IGHA1_HUMAN Immunoglobulin heavy constant alpha 1 OS=Homo sapiens GN=IGHA1 PE=1 SV=2	11916	File384_Scan2335	controllerType=0 controllerNumber=1 scan=2335	14.7676
07856:3	3	R.DLC[+57.021]GC[+57.021]YSVSSVLPGC[+57.021]AEPWNHGK.T		C[+57]*3	865.054	3	2593.15	2593.13	0	8.5	178	Specific	166.84	97.27	97.27	0.61	41	>sp|P01876|IGHA1_HUMAN Immunoglobulin heavy constant alpha 1 OS=Homo sapiens GN=IGHA1 PE=1 SV=2	11916	File384_Scan10109	controllerType=0 controllerNumber=1 scan=10109	32.1658
07753:3	3	R.DLC[+57.021]GC[+57.021]YSVSSVLPGC[+57.021]AEPWNHGK.T		C[+57]*3	865.045	3	2593.12	2593.13	0	-2.3	178	Specific	320.1	320.1	320.1	5.94	41	>sp|P01876|IGHA1_HUMAN Immunoglobulin heavy constant alpha 1 OS=Homo sapiens GN=IGHA1 PE=1 SV=2	11916	File384_Scan10001	controllerType=0 controllerNumber=1 scan=10001	31.9359
07628:3	3	R.DLC[+57.021]GC[+57.021]YSVSSVLPGC[+57.021]AEPWNHGK.T		C[+57]*3	865.048	3	2593.13	2593.13	0	1.1	178	Specific	623.34	610.02	610.02	13.12	41	>sp|P01876|IGHA1_HUMAN Immunoglobulin heavy constant alpha 1 OS=Homo sapiens GN=IGHA1 PE=1 SV=2	11916	File384_Scan9870	controllerType=0 controllerNumber=1 scan=9870	31.6801
07522:3	3	R.DLC[+57.021]GC[+57.021]YSVSSVLPGC[+57.021]AEPWNHGK.T		C[+57]*3	865.047	3	2593.13	2593.13	0	0.3	178	Specific	821.19	784.97	784.97	16.97	41	>sp|P01876|IGHA1_HUMAN Immunoglobulin heavy constant alpha 1 OS=Homo sapiens GN=IGHA1 PE=1 SV=2	11916	File384_Scan9759	controllerType=0 controllerNumber=1 scan=9759	31.4521
03751:2	3	K.TFTC[+57.021]TAAYPESK.T		C[+57]	688.314	2	1375.62	1375.62	0	1	201	Specific	381.27	368.82	368.82	7.49	41	>sp|P01876|IGHA1_HUMAN Immunoglobulin heavy constant alpha 1 OS=Homo sapiens GN=IGHA1 PE=1 SV=2	11916	File384_Scan5609	controllerType=0 controllerNumber=1 scan=5609	21.9072
03365:2	3	K.TFTC[+57.021]TAAYPESK.T		C[+57]	688.314	2	1375.62	1375.62	0	0.5	201	Specific	479.11	434	434	9.9	41	>sp|P01876|IGHA1_HUMAN Immunoglobulin heavy constant alpha 1 OS=Homo sapiens GN=IGHA1 PE=1 SV=2	11916	File384_Scan5176	controllerType=0 controllerNumber=1 scan=5176	20.9615
03487:2	3	K.TFTC[+57.021]TAAYPESK.T		C[+57]	688.314	2	1375.62	1375.62	0	1.1	201	Specific	546.02	521.57	521.57	10.47	41	>sp|P01876|IGHA1_HUMAN Immunoglobulin heavy constant alpha 1 OS=Homo sapiens GN=IGHA1 PE=1 SV=2	11916	File384_Scan5303	controllerType=0 controllerNumber=1 scan=5303	21.2463
03147:2	3	K.TFTC[+57.021]TAAYPESK.T		C[+57]	688.314	2	1375.62	1375.62	0	0.1	201	Specific	617.79	573.19	573.19	12.61	41	>sp|P01876|IGHA1_HUMAN Immunoglobulin heavy constant alpha 1 OS=Homo sapiens GN=IGHA1 PE=1 SV=2	11916	File384_Scan4948	controllerType=0 controllerNumber=1 scan=4948	20.4867
03247:2	3	K.TFTC[+57.021]TAAYPESK.T		C[+57]	688.314	2	1375.62	1375.62	0	0.9	201	Specific	621.99	578.86	578.86	12.61	41	>sp|P01876|IGHA1_HUMAN Immunoglobulin heavy constant alpha 1 OS=Homo sapiens GN=IGHA1 PE=1 SV=2	11916	File384_Scan5053	controllerType=0 controllerNumber=1 scan=5053	20.7004
03033:2	3	K.TFTC[+57.021]TAAYPESK.T		C[+57]	688.314	2	1375.62	1375.62	0	0.8	201	Specific	661.26	638.23	638.23	13.61	41	>sp|P01876|IGHA1_HUMAN Immunoglobulin heavy constant alpha 1 OS=Homo sapiens GN=IGHA1 PE=1 SV=2	11916	File384_Scan4829	controllerType=0 controllerNumber=1 scan=4829	20.2194
02695:2	3	K.TFTC[+57.021]TAAYPESK.T		C[+57]	688.314	2	1375.62	1375.62	0	0.9	201	Specific	699.75	638.21	638.21	13.61	41	>sp|P01876|IGHA1_HUMAN Immunoglobulin heavy constant alpha 1 OS=Homo sapiens GN=IGHA1 PE=1 SV=2	11916	File384_Scan4476	controllerType=0 controllerNumber=1 scan=4476	19.3902
02921:2	3	K.TFTC[+57.021]TAAYPESK.T		C[+57]	688.314	2	1375.62	1375.62	0	0.9	201	Specific	703	663.82	663.82	14.61	41	>sp|P01876|IGHA1_HUMAN Immunoglobulin heavy constant alpha 1 OS=Homo sapiens GN=IGHA1 PE=1 SV=2	11916	File384_Scan4712	controllerType=0 controllerNumber=1 scan=4712	19.9568
02798:2	3	K.TFTC[+57.021]TAAYPESK.T		C[+57]	688.316	2	1375.62	1375.62	0	3.3	201	Specific	713.33	662.26	662.26	13.39	41	>sp|P01876|IGHA1_HUMAN Immunoglobulin heavy constant alpha 1 OS=Homo sapiens GN=IGHA1 PE=1 SV=2	11916	File384_Scan4584	controllerType=0 controllerNumber=1 scan=4584	19.6455
12706:2	3	K.TPLTATLSK.S			466.276	2	931.545	931.546	0	-0.9	213	Specific	7.4	7.4	7.4	0.57	41	>sp|P01876|IGHA1_HUMAN Immunoglobulin heavy constant alpha 1 OS=Homo sapiens GN=IGHA1 PE=1 SV=2	11916	File384_Scan15591	controllerType=0 controllerNumber=1 scan=15591	44.9168
12586:2	3	K.TPLTATLSK.S			466.276	2	931.546	931.546	0	-0.3	213	Specific	18.33	18.33	18.33	0.6	41	>sp|P01876|IGHA1_HUMAN Immunoglobulin heavy constant alpha 1 OS=Homo sapiens GN=IGHA1 PE=1 SV=2	11916	File384_Scan15337	controllerType=0 controllerNumber=1 scan=15337	43.7394
12203:2	3	K.TPLTATLSK.S			466.276	2	931.546	931.546	0	-0.3	213	Specific	31.73	9.56	9.56	0.66	41	>sp|P01876|IGHA1_HUMAN Immunoglobulin heavy constant alpha 1 OS=Homo sapiens GN=IGHA1 PE=1 SV=2	11916	File384_Scan14832	controllerType=0 controllerNumber=1 scan=14832	42.2423
12694:2	3	K.TPLTATLSK.S			466.276	2	931.545	931.546	0	-0.5	213	Specific	36.49	36.49	36.49	1.33	41	>sp|P01876|IGHA1_HUMAN Immunoglobulin heavy constant alpha 1 OS=Homo sapiens GN=IGHA1 PE=1 SV=2	11916	File384_Scan15557	controllerType=0 controllerNumber=1 scan=15557	44.7378
11056:2	3	K.TPLTATLSK.S			466.277	2	931.546	931.546	0	0.1	213	Specific	36.96	1.89	1.89	0.91	41	>sp|P01876|IGHA1_HUMAN Immunoglobulin heavy constant alpha 1 OS=Homo sapiens GN=IGHA1 PE=1 SV=2	11916	File384_Scan13490	controllerType=0 controllerNumber=1 scan=13490	39.0978
12676:2	3	K.TPLTATLSK.S			466.276	2	931.545	931.546	0	-0.4	213	Specific	49.52	49.52	49.52	1.54	41	>sp|P01876|IGHA1_HUMAN Immunoglobulin heavy constant alpha 1 OS=Homo sapiens GN=IGHA1 PE=1 SV=2	11916	File384_Scan15519	controllerType=0 controllerNumber=1 scan=15519	44.5547
12565:2	3	K.TPLTATLSK.S			466.277	2	931.546	931.546	0	0.1	213	Specific	53.45	53.45	53.45	1.62	41	>sp|P01876|IGHA1_HUMAN Immunoglobulin heavy constant alpha 1 OS=Homo sapiens GN=IGHA1 PE=1 SV=2	11916	File384_Scan15297	controllerType=0 controllerNumber=1 scan=15297	43.5671
12631:2	3	K.TPLTATLSK.S			466.277	2	931.547	931.546	0	1.1	213	Specific	59.53	59.53	59.53	1.75	41	>sp|P01876|IGHA1_HUMAN Immunoglobulin heavy constant alpha 1 OS=Homo sapiens GN=IGHA1 PE=1 SV=2	11916	File384_Scan15432	controllerType=0 controllerNumber=1 scan=15432	44.1904
13815:2	3	K.TPLTATLSK.S			466.276	2	931.546	931.546	0	-0.3	213	Specific	61.82	23.76	23.76	1.33	41	>sp|P01876|IGHA1_HUMAN Immunoglobulin heavy constant alpha 1 OS=Homo sapiens GN=IGHA1 PE=1 SV=2	11916	File384_Scan17003	controllerType=0 controllerNumber=1 scan=17003	48.9278
12899:2	3	K.TPLTATLSK.S			466.276	2	931.545	931.546	0	-1	213	Specific	65.07	24.7	24.7	1.45	41	>sp|P01876|IGHA1_HUMAN Immunoglobulin heavy constant alpha 1 OS=Homo sapiens GN=IGHA1 PE=1 SV=2	11916	File384_Scan15957	controllerType=0 controllerNumber=1 scan=15957	46.4873
12730:2	3	K.TPLTATLSK.S			466.277	2	931.547	931.546	0	1.3	213	Specific	76.49	54.85	54.85	1.82	41	>sp|P01876|IGHA1_HUMAN Immunoglobulin heavy constant alpha 1 OS=Homo sapiens GN=IGHA1 PE=1 SV=2	11916	File384_Scan15654	controllerType=0 controllerNumber=1 scan=15654	45.2411
12740:2	3	K.TPLTATLSK.S			466.277	2	931.546	931.546	0	0.5	213	Specific	79.05	66.44	66.44	1.87	41	>sp|P01876|IGHA1_HUMAN Immunoglobulin heavy constant alpha 1 OS=Homo sapiens GN=IGHA1 PE=1 SV=2	11916	File384_Scan15689	controllerType=0 controllerNumber=1 scan=15689	45.4472
13109:2	3	K.TPLTATLSK.S			466.277	2	931.546	931.546	0	0.6	213	Specific	93.45	24.68	24.68	1.78	41	>sp|P01876|IGHA1_HUMAN Immunoglobulin heavy constant alpha 1 OS=Homo sapiens GN=IGHA1 PE=1 SV=2	11916	File384_Scan16214	controllerType=0 controllerNumber=1 scan=16214	47.1778
13887:2	3	K.TPLTATLSK.S			466.276	2	931.545	931.546	0	-0.6	213	Specific	96.85	84.68	84.68	1.79	41	>sp|P01876|IGHA1_HUMAN Immunoglobulin heavy constant alpha 1 OS=Homo sapiens GN=IGHA1 PE=1 SV=2	11916	File384_Scan17087	controllerType=0 controllerNumber=1 scan=17087	49.1379
13224:2	3	K.TPLTATLSK.S			466.277	2	931.547	931.546	0	0.9	213	Specific	102.73	66.52	66.52	2.19	41	>sp|P01876|IGHA1_HUMAN Immunoglobulin heavy constant alpha 1 OS=Homo sapiens GN=IGHA1 PE=1 SV=2	11916	File384_Scan16356	controllerType=0 controllerNumber=1 scan=16356	47.5603
13399:2	3	K.TPLTATLSK.S			466.276	2	931.545	931.546	0	-0.5	213	Specific	119.7	106.81	106.81	2.28	41	>sp|P01876|IGHA1_HUMAN Immunoglobulin heavy constant alpha 1 OS=Homo sapiens GN=IGHA1 PE=1 SV=2	11916	File384_Scan16543	controllerType=0 controllerNumber=1 scan=16543	47.9508
12772:2	3	K.TPLTATLSK.S			466.276	2	931.545	931.546	0	-0.6	213	Specific	119.92	57.21	57.21	1.8	41	>sp|P01876|IGHA1_HUMAN Immunoglobulin heavy constant alpha 1 OS=Homo sapiens GN=IGHA1 PE=1 SV=2	11916	File384_Scan15742	controllerType=0 controllerNumber=1 scan=15742	45.6671
13590:2	3	K.TPLTATLSK.S			466.277	2	931.546	931.546	0	0.1	213	Specific	126.92	126.92	126.92	2.72	41	>sp|P01876|IGHA1_HUMAN Immunoglobulin heavy constant alpha 1 OS=Homo sapiens GN=IGHA1 PE=1 SV=2	11916	File384_Scan16749	controllerType=0 controllerNumber=1 scan=16749	48.3869
10933:2	3	K.TPLTATLSK.S			466.276	2	931.545	931.546	0	-0.6	213	Specific	128.37	61.56	61.56	2.23	41	>sp|P01876|IGHA1_HUMAN Immunoglobulin heavy constant alpha 1 OS=Homo sapiens GN=IGHA1 PE=1 SV=2	11916	File384_Scan13361	controllerType=0 controllerNumber=1 scan=13361	38.8487
12797:2	3	K.TPLTATLSK.S			466.277	2	931.546	931.546	0	0.2	213	Specific	131.1	108.5	108.5	2.89	41	>sp|P01876|IGHA1_HUMAN Immunoglobulin heavy constant alpha 1 OS=Homo sapiens GN=IGHA1 PE=1 SV=2	11916	File384_Scan15792	controllerType=0 controllerNumber=1 scan=15792	45.8887
12862:2	3	K.TPLTATLSK.S			466.276	2	931.545	931.546	0	-0.5	213	Specific	135.85	113.25	113.25	2.31	41	>sp|P01876|IGHA1_HUMAN Immunoglobulin heavy constant alpha 1 OS=Homo sapiens GN=IGHA1 PE=1 SV=2	11916	File384_Scan15898	controllerType=0 controllerNumber=1 scan=15898	46.2803
12482:2	3	K.TPLTATLSK.S			466.277	2	931.546	931.546	0	0.2	213	Specific	139.66	61.94	61.94	2.28	41	>sp|P01876|IGHA1_HUMAN Immunoglobulin heavy constant alpha 1 OS=Homo sapiens GN=IGHA1 PE=1 SV=2	11916	File384_Scan15145	controllerType=0 controllerNumber=1 scan=15145	42.9188
13709:2	3	K.TPLTATLSK.S			466.277	2	931.546	931.546	0	0.3	213	Specific	142.22	72.28	72.28	2.28	41	>sp|P01876|IGHA1_HUMAN Immunoglobulin heavy constant alpha 1 OS=Homo sapiens GN=IGHA1 PE=1 SV=2	11916	File384_Scan16879	controllerType=0 controllerNumber=1 scan=16879	48.6564
11611:2	3	K.TPLTATLSK.S			466.277	2	931.546	931.546	0	0.2	213	Specific	149.25	71.44	71.44	2.3	41	>sp|P01876|IGHA1_HUMAN Immunoglobulin heavy constant alpha 1 OS=Homo sapiens GN=IGHA1 PE=1 SV=2	11916	File384_Scan14100	controllerType=0 controllerNumber=1 scan=14100	40.5339
12121:2	3	K.TPLTATLSK.S			466.276	2	931.546	931.546	0	-0.2	213	Specific	151.07	71.61	71.61	2.23	41	>sp|P01876|IGHA1_HUMAN Immunoglobulin heavy constant alpha 1 OS=Homo sapiens GN=IGHA1 PE=1 SV=2	11916	File384_Scan14717	controllerType=0 controllerNumber=1 scan=14717	41.9715
12974:2	3	K.TPLTATLSK.S			466.277	2	931.546	931.546	0	0.2	213	Specific	156.42	114.93	114.93	2.89	41	>sp|P01876|IGHA1_HUMAN Immunoglobulin heavy constant alpha 1 OS=Homo sapiens GN=IGHA1 PE=1 SV=2	11916	File384_Scan16055	controllerType=0 controllerNumber=1 scan=16055	46.7738
12415:2	3	K.TPLTATLSK.S			466.277	2	931.546	931.546	0	0.3	213	Specific	161.1	131.28	131.28	3.12	41	>sp|P01876|IGHA1_HUMAN Immunoglobulin heavy constant alpha 1 OS=Homo sapiens GN=IGHA1 PE=1 SV=2	11916	File384_Scan15067	controllerType=0 controllerNumber=1 scan=15067	42.7353
12038:2	3	K.TPLTATLSK.S			466.277	2	931.546	931.546	0	0	213	Specific	164.79	68.18	68.18	2.31	41	>sp|P01876|IGHA1_HUMAN Immunoglobulin heavy constant alpha 1 OS=Homo sapiens GN=IGHA1 PE=1 SV=2	11916	File384_Scan14612	controllerType=0 controllerNumber=1 scan=14612	41.7408
10746:2	3	K.TPLTATLSK.S			466.276	2	931.545	931.546	0	-0.6	213	Specific	166.83	66.64	66.64	2.23	41	>sp|P01876|IGHA1_HUMAN Immunoglobulin heavy constant alpha 1 OS=Homo sapiens GN=IGHA1 PE=1 SV=2	11916	File384_Scan13163	controllerType=0 controllerNumber=1 scan=13163	38.4545
13157:2	3	K.TPLTATLSK.S			466.277	2	931.546	931.546	0	0.3	213	Specific	177.96	97.3	97.3	2.43	41	>sp|P01876|IGHA1_HUMAN Immunoglobulin heavy constant alpha 1 OS=Homo sapiens GN=IGHA1 PE=1 SV=2	11916	File384_Scan16278	controllerType=0 controllerNumber=1 scan=16278	47.3662
10501:2	3	K.TPLTATLSK.S			466.277	2	931.546	931.546	0	0.5	213	Specific	211.47	108.94	108.94	3.27	41	>sp|P01876|IGHA1_HUMAN Immunoglobulin heavy constant alpha 1 OS=Homo sapiens GN=IGHA1 PE=1 SV=2	11916	File384_Scan12906	controllerType=0 controllerNumber=1 scan=12906	37.9432
12829:2	3	K.TPLTATLSK.S			466.276	2	931.545	931.546	0	-0.8	213	Specific	214.04	115.15	115.15	2.94	41	>sp|P01876|IGHA1_HUMAN Immunoglobulin heavy constant alpha 1 OS=Homo sapiens GN=IGHA1 PE=1 SV=2	11916	File384_Scan15847	controllerType=0 controllerNumber=1 scan=15847	46.106
11366:2	3	K.TPLTATLSK.S			466.277	2	931.546	931.546	0	0.1	213	Specific	242.51	116.85	116.85	4.79	41	>sp|P01876|IGHA1_HUMAN Immunoglobulin heavy constant alpha 1 OS=Homo sapiens GN=IGHA1 PE=1 SV=2	11916	File384_Scan13815	controllerType=0 controllerNumber=1 scan=13815	39.8025
05873:2	3	K.TPLTATLSK.S			466.276	2	931.545	931.546	0	-0.7	213	Specific	254.47	77.07	77.07	2.28	41	>sp|P01876|IGHA1_HUMAN Immunoglobulin heavy constant alpha 1 OS=Homo sapiens GN=IGHA1 PE=1 SV=2	11916	File384_Scan8029	controllerType=0 controllerNumber=1 scan=8029	27.8016
11760:2	3	K.TPLTATLSK.S			466.277	2	931.547	931.546	0	1.4	213	Specific	289.95	137.1	137.1	6.48	41	>sp|P01876|IGHA1_HUMAN Immunoglobulin heavy constant alpha 1 OS=Homo sapiens GN=IGHA1 PE=1 SV=2	11916	File384_Scan14288	controllerType=0 controllerNumber=1 scan=14288	41.026
11181:2	3	K.TPLTATLSK.S			466.277	2	931.546	931.546	0	0.2	213	Specific	290.5	154.27	154.27	6.69	41	>sp|P01876|IGHA1_HUMAN Immunoglobulin heavy constant alpha 1 OS=Homo sapiens GN=IGHA1 PE=1 SV=2	11916	File384_Scan13621	controllerType=0 controllerNumber=1 scan=13621	39.3827
11961:2	3	K.TPLTATLSK.S			466.277	2	931.546	931.546	0	0	213	Specific	293.45	168.63	168.63	6.76	41	>sp|P01876|IGHA1_HUMAN Immunoglobulin heavy constant alpha 1 OS=Homo sapiens GN=IGHA1 PE=1 SV=2	11916	File384_Scan14519	controllerType=0 controllerNumber=1 scan=14519	41.5409
10614:2	3	K.TPLTATLSK.S			466.277	2	931.546	931.546	0	-0.1	213	Specific	308.65	141.42	141.42	6.53	41	>sp|P01876|IGHA1_HUMAN Immunoglobulin heavy constant alpha 1 OS=Homo sapiens GN=IGHA1 PE=1 SV=2	11916	File384_Scan13025	controllerType=0 controllerNumber=1 scan=13025	38.1801
11871:2	3	K.TPLTATLSK.S			466.277	2	931.546	931.546	0	0.3	213	Specific	317.93	162.49	162.49	7.04	41	>sp|P01876|IGHA1_HUMAN Immunoglobulin heavy constant alpha 1 OS=Homo sapiens GN=IGHA1 PE=1 SV=2	11916	File384_Scan14420	controllerType=0 controllerNumber=1 scan=14420	41.3205
09540:2	3	K.TPLTATLSK.S			466.276	2	931.546	931.546	0	-0.3	213	Specific	319.78	156.36	156.36	6.53	41	>sp|P01876|IGHA1_HUMAN Immunoglobulin heavy constant alpha 1 OS=Homo sapiens GN=IGHA1 PE=1 SV=2	11916	File384_Scan11885	controllerType=0 controllerNumber=1 scan=11885	35.8284
03324:2	3	K.TPLTATLSK.S			466.277	2	931.546	931.546	0	0.6	213	Specific	327.78	100.23	100.23	4.8	41	>sp|P01876|IGHA1_HUMAN Immunoglobulin heavy constant alpha 1 OS=Homo sapiens GN=IGHA1 PE=1 SV=2	11916	File384_Scan5133	controllerType=0 controllerNumber=1 scan=5133	20.8683
09686:2	3	K.TPLTATLSK.S			466.276	2	931.546	931.546	0	-0.2	213	Specific	349.68	149.64	149.64	6.75	41	>sp|P01876|IGHA1_HUMAN Immunoglobulin heavy constant alpha 1 OS=Homo sapiens GN=IGHA1 PE=1 SV=2	11916	File384_Scan12039	controllerType=0 controllerNumber=1 scan=12039	36.1407
08958:2	3	K.TPLTATLSK.S			466.276	2	931.545	931.546	0	-0.9	213	Specific	353.57	142.53	142.53	5.7	41	>sp|P01876|IGHA1_HUMAN Immunoglobulin heavy constant alpha 1 OS=Homo sapiens GN=IGHA1 PE=1 SV=2	11916	File384_Scan11275	controllerType=0 controllerNumber=1 scan=11275	34.5184
09797:2	3	K.TPLTATLSK.S			466.277	2	931.546	931.546	0	0.1	213	Specific	354.54	174.06	174.06	6.21	41	>sp|P01876|IGHA1_HUMAN Immunoglobulin heavy constant alpha 1 OS=Homo sapiens GN=IGHA1 PE=1 SV=2	11916	File384_Scan12160	controllerType=0 controllerNumber=1 scan=12160	36.3998
09929:2	3	K.TPLTATLSK.S			466.277	2	931.546	931.546	0	0.2	213	Specific	355.17	115.25	115.25	6.49	41	>sp|P01876|IGHA1_HUMAN Immunoglobulin heavy constant alpha 1 OS=Homo sapiens GN=IGHA1 PE=1 SV=2	11916	File384_Scan12300	controllerType=0 controllerNumber=1 scan=12300	36.6949
09421:2	3	K.TPLTATLSK.S			466.277	2	931.546	931.546	0	0.1	213	Specific	359.85	122.31	122.31	5.82	41	>sp|P01876|IGHA1_HUMAN Immunoglobulin heavy constant alpha 1 OS=Homo sapiens GN=IGHA1 PE=1 SV=2	11916	File384_Scan11760	controllerType=0 controllerNumber=1 scan=11760	35.5518
10193:2	3	K.TPLTATLSK.S			466.277	2	931.546	931.546	0	0.2	213	Specific	360.3	161.15	161.15	7.49	41	>sp|P01876|IGHA1_HUMAN Immunoglobulin heavy constant alpha 1 OS=Homo sapiens GN=IGHA1 PE=1 SV=2	11916	File384_Scan12581	controllerType=0 controllerNumber=1 scan=12581	37.287
10069:2	3	K.TPLTATLSK.S			466.277	2	931.546	931.546	0	0.2	213	Specific	368.05	148.87	148.87	6.52	41	>sp|P01876|IGHA1_HUMAN Immunoglobulin heavy constant alpha 1 OS=Homo sapiens GN=IGHA1 PE=1 SV=2	11916	File384_Scan12447	controllerType=0 controllerNumber=1 scan=12447	37.0103
06735:2	3	K.TPLTATLSK.S			466.276	2	931.546	931.546	0	-0.3	213	Specific	368.8	147.13	147.13	5.82	41	>sp|P01876|IGHA1_HUMAN Immunoglobulin heavy constant alpha 1 OS=Homo sapiens GN=IGHA1 PE=1 SV=2	11916	File384_Scan8931	controllerType=0 controllerNumber=1 scan=8931	29.7397
08440:2	3	K.TPLTATLSK.S			466.276	2	931.546	931.546	0	-0.3	213	Specific	386.39	168.54	168.54	6.19	41	>sp|P01876|IGHA1_HUMAN Immunoglobulin heavy constant alpha 1 OS=Homo sapiens GN=IGHA1 PE=1 SV=2	11916	File384_Scan10721	controllerType=0 controllerNumber=1 scan=10721	33.3977
09208:2	3	K.TPLTATLSK.S			466.277	2	931.546	931.546	0	0.3	213	Specific	388.54	167.05	167.05	6.56	41	>sp|P01876|IGHA1_HUMAN Immunoglobulin heavy constant alpha 1 OS=Homo sapiens GN=IGHA1 PE=1 SV=2	11916	File384_Scan11537	controllerType=0 controllerNumber=1 scan=11537	35.0749
06861:2	3	K.TPLTATLSK.S			466.277	2	931.546	931.546	0	0.1	213	Specific	397.21	161.76	161.76	6.56	41	>sp|P01876|IGHA1_HUMAN Immunoglobulin heavy constant alpha 1 OS=Homo sapiens GN=IGHA1 PE=1 SV=2	11916	File384_Scan9063	controllerType=0 controllerNumber=1 scan=9063	30.0042
07909:2	3	K.TPLTATLSK.S			466.277	2	931.546	931.546	0	0.3	213	Specific	406.56	159.17	159.17	7.38	41	>sp|P01876|IGHA1_HUMAN Immunoglobulin heavy constant alpha 1 OS=Homo sapiens GN=IGHA1 PE=1 SV=2	11916	File384_Scan10164	controllerType=0 controllerNumber=1 scan=10164	32.2772
03854:2	3	K.TPLTATLSK.S			466.277	2	931.546	931.546	0	0.1	213	Specific	421.83	224.04	224.04	6.92	41	>sp|P01876|IGHA1_HUMAN Immunoglobulin heavy constant alpha 1 OS=Homo sapiens GN=IGHA1 PE=1 SV=2	11916	File384_Scan5743	controllerType=0 controllerNumber=1 scan=5743	22.2146
05351:2	3	K.TPLTATLSK.S			466.276	2	931.545	931.546	0	-0.4	213	Specific	428.07	179.87	179.87	6.39	41	>sp|P01876|IGHA1_HUMAN Immunoglobulin heavy constant alpha 1 OS=Homo sapiens GN=IGHA1 PE=1 SV=2	11916	File384_Scan7469	controllerType=0 controllerNumber=1 scan=7469	26.4749
06972:2	3	K.TPLTATLSK.S			466.277	2	931.546	931.546	0	0.2	213	Specific	429.34	170.87	170.87	6.61	41	>sp|P01876|IGHA1_HUMAN Immunoglobulin heavy constant alpha 1 OS=Homo sapiens GN=IGHA1 PE=1 SV=2	11916	File384_Scan9180	controllerType=0 controllerNumber=1 scan=9180	30.2449
08026:2	3	K.TPLTATLSK.S			466.276	2	931.546	931.546	0	-0.3	213	Specific	447.99	183.19	183.19	6.44	41	>sp|P01876|IGHA1_HUMAN Immunoglobulin heavy constant alpha 1 OS=Homo sapiens GN=IGHA1 PE=1 SV=2	11916	File384_Scan10287	controllerType=0 controllerNumber=1 scan=10287	32.5277
05577:2	3	K.TPLTATLSK.S			466.277	2	931.546	931.546	0	0.2	213	Specific	452.66	185.13	185.13	7.56	41	>sp|P01876|IGHA1_HUMAN Immunoglobulin heavy constant alpha 1 OS=Homo sapiens GN=IGHA1 PE=1 SV=2	11916	File384_Scan7709	controllerType=0 controllerNumber=1 scan=7709	27.0193
05469:2	3	K.TPLTATLSK.S			466.277	2	931.546	931.546	0	0.2	213	Specific	453.32	192.48	192.48	7.56	41	>sp|P01876|IGHA1_HUMAN Immunoglobulin heavy constant alpha 1 OS=Homo sapiens GN=IGHA1 PE=1 SV=2	11916	File384_Scan7594	controllerType=0 controllerNumber=1 scan=7594	26.7661
06340:2	3	K.TPLTATLSK.S			466.277	2	931.546	931.546	0	0.1	213	Specific	457.01	202.75	202.75	7.79	41	>sp|P01876|IGHA1_HUMAN Immunoglobulin heavy constant alpha 1 OS=Homo sapiens GN=IGHA1 PE=1 SV=2	11916	File384_Scan8517	controllerType=0 controllerNumber=1 scan=8517	28.8838
06513:2	3	K.TPLTATLSK.S			466.277	2	931.546	931.546	0	0	213	Specific	468.05	219.89	219.89	7.67	41	>sp|P01876|IGHA1_HUMAN Immunoglobulin heavy constant alpha 1 OS=Homo sapiens GN=IGHA1 PE=1 SV=2	11916	File384_Scan8698	controllerType=0 controllerNumber=1 scan=8698	29.2669
05700:2	3	K.TPLTATLSK.S			466.277	2	931.546	931.546	0	0.4	213	Specific	468.4	204.29	204.29	7.21	41	>sp|P01876|IGHA1_HUMAN Immunoglobulin heavy constant alpha 1 OS=Homo sapiens GN=IGHA1 PE=1 SV=2	11916	File384_Scan7845	controllerType=0 controllerNumber=1 scan=7845	27.3548
06059:2	3	K.TPLTATLSK.S			466.276	2	931.545	931.546	0	-0.7	213	Specific	477.31	216.51	216.51	6.99	41	>sp|P01876|IGHA1_HUMAN Immunoglobulin heavy constant alpha 1 OS=Homo sapiens GN=IGHA1 PE=1 SV=2	11916	File384_Scan8223	controllerType=0 controllerNumber=1 scan=8223	28.2476
05130:2	3	K.TPLTATLSK.S			466.277	2	931.546	931.546	0	-0.1	213	Specific	489.14	235.95	235.95	7.76	41	>sp|P01876|IGHA1_HUMAN Immunoglobulin heavy constant alpha 1 OS=Homo sapiens GN=IGHA1 PE=1 SV=2	11916	File384_Scan7238	controllerType=0 controllerNumber=1 scan=7238	25.918
04789:2	3	K.TPLTATLSK.S			466.277	2	931.546	931.546	0	0.1	213	Specific	501.98	202.61	202.61	8.09	41	>sp|P01876|IGHA1_HUMAN Immunoglobulin heavy constant alpha 1 OS=Homo sapiens GN=IGHA1 PE=1 SV=2	11916	File384_Scan6884	controllerType=0 controllerNumber=1 scan=6884	25.0374
04162:2	3	K.TPLTATLSK.S			466.277	2	931.546	931.546	0	0.3	213	Specific	507	243.8	243.8	7.54	41	>sp|P01876|IGHA1_HUMAN Immunoglobulin heavy constant alpha 1 OS=Homo sapiens GN=IGHA1 PE=1 SV=2	11916	File384_Scan6135	controllerType=0 controllerNumber=1 scan=6135	23.1759
04662:2	3	K.TPLTATLSK.S			466.276	2	931.546	931.546	0	-0.3	213	Specific	511.84	249.05	249.05	8	41	>sp|P01876|IGHA1_HUMAN Immunoglobulin heavy constant alpha 1 OS=Homo sapiens GN=IGHA1 PE=1 SV=2	11916	File384_Scan6751	controllerType=0 controllerNumber=1 scan=6751	24.689
04560:2	3	K.TPLTATLSK.S			466.276	2	931.545	931.546	0	-0.4	213	Specific	515.37	253.33	253.33	7.32	41	>sp|P01876|IGHA1_HUMAN Immunoglobulin heavy constant alpha 1 OS=Homo sapiens GN=IGHA1 PE=1 SV=2	11916	File384_Scan6636	controllerType=0 controllerNumber=1 scan=6636	24.4299
05250:2	3	K.TPLTATLSK.S			466.277	2	931.546	931.546	0	0.1	213	Specific	515.52	254.08	254.08	7.54	41	>sp|P01876|IGHA1_HUMAN Immunoglobulin heavy constant alpha 1 OS=Homo sapiens GN=IGHA1 PE=1 SV=2	11916	File384_Scan7363	controllerType=0 controllerNumber=1 scan=7363	26.2285
04239:2	3	K.TPLTATLSK.S			466.277	2	931.546	931.546	0	0	213	Specific	519.74	249.52	249.52	8	41	>sp|P01876|IGHA1_HUMAN Immunoglobulin heavy constant alpha 1 OS=Homo sapiens GN=IGHA1 PE=1 SV=2	11916	File384_Scan6246	controllerType=0 controllerNumber=1 scan=6246	23.4571
04455:2	3	K.TPLTATLSK.S			466.276	2	931.545	931.546	0	-0.5	213	Specific	524.22	274.16	274.16	8.15	41	>sp|P01876|IGHA1_HUMAN Immunoglobulin heavy constant alpha 1 OS=Homo sapiens GN=IGHA1 PE=1 SV=2	11916	File384_Scan6518	controllerType=0 controllerNumber=1 scan=6518	24.1397
04340:2	3	K.TPLTATLSK.S			466.277	2	931.546	931.546	0	0.3	213	Specific	525.38	260.76	260.76	8.37	41	>sp|P01876|IGHA1_HUMAN Immunoglobulin heavy constant alpha 1 OS=Homo sapiens GN=IGHA1 PE=1 SV=2	11916	File384_Scan6384	controllerType=0 controllerNumber=1 scan=6384	23.7975
04894:2	3	K.TPLTATLSK.S			466.276	2	931.546	931.546	0	-0.3	213	Specific	528.74	259.25	259.25	8.07	41	>sp|P01876|IGHA1_HUMAN Immunoglobulin heavy constant alpha 1 OS=Homo sapiens GN=IGHA1 PE=1 SV=2	11916	File384_Scan6993	controllerType=0 controllerNumber=1 scan=6993	25.3214
05009:2	3	K.TPLTATLSK.S			466.276	2	931.546	931.546	0	-0.3	213	Specific	541.97	263.78	263.78	8.3	41	>sp|P01876|IGHA1_HUMAN Immunoglobulin heavy constant alpha 1 OS=Homo sapiens GN=IGHA1 PE=1 SV=2	11916	File384_Scan7113	controllerType=0 controllerNumber=1 scan=7113	25.6077
03906:2	3	K.TPLTATLSK.S			466.277	2	931.546	931.546	0	-0.1	213	Specific	552.53	284.68	284.68	8.28	41	>sp|P01876|IGHA1_HUMAN Immunoglobulin heavy constant alpha 1 OS=Homo sapiens GN=IGHA1 PE=1 SV=2	11916	File384_Scan5810	controllerType=0 controllerNumber=1 scan=5810	22.3833
03658:2	3	K.TPLTATLSK.S			466.276	2	931.545	931.546	0	-1.4	213	Specific	552.59	292.31	292.31	8.05	41	>sp|P01876|IGHA1_HUMAN Immunoglobulin heavy constant alpha 1 OS=Homo sapiens GN=IGHA1 PE=1 SV=2	11916	File384_Scan5491	controllerType=0 controllerNumber=1 scan=5491	21.6434
04010:2	3	K.TPLTATLSK.S			466.276	2	931.546	931.546	0	-0.1	213	Specific	553.12	287.77	287.77	7.38	41	>sp|P01876|IGHA1_HUMAN Immunoglobulin heavy constant alpha 1 OS=Homo sapiens GN=IGHA1 PE=1 SV=2	11916	File384_Scan5933	controllerType=0 controllerNumber=1 scan=5933	22.668
04085:2	3	K.TPLTATLSK.S			466.276	2	931.546	931.546	0	-0.1	213	Specific	573.66	297.1	297.1	8.45	41	>sp|P01876|IGHA1_HUMAN Immunoglobulin heavy constant alpha 1 OS=Homo sapiens GN=IGHA1 PE=1 SV=2	11916	File384_Scan6037	controllerType=0 controllerNumber=1 scan=6037	22.9376
03828:2	3	K.TPLTATLSK.S			466.276	2	931.545	931.546	0	-0.8	213	Specific	585.66	302.94	302.94	8.93	41	>sp|P01876|IGHA1_HUMAN Immunoglobulin heavy constant alpha 1 OS=Homo sapiens GN=IGHA1 PE=1 SV=2	11916	File384_Scan5708	controllerType=0 controllerNumber=1 scan=5708	22.1335
03752:2	3	K.TPLTATLSK.S			466.277	2	931.546	931.546	0	0	213	Specific	586.74	321.89	321.89	9.76	41	>sp|P01876|IGHA1_HUMAN Immunoglobulin heavy constant alpha 1 OS=Homo sapiens GN=IGHA1 PE=1 SV=2	11916	File384_Scan5612	controllerType=0 controllerNumber=1 scan=5612	21.9159
03543:2	3	K.TPLTATLSK.S			466.277	2	931.546	931.546	0	0.2	213	Specific	602.09	333.15	333.15	10.99	41	>sp|P01876|IGHA1_HUMAN Immunoglobulin heavy constant alpha 1 OS=Homo sapiens GN=IGHA1 PE=1 SV=2	11916	File384_Scan5366	controllerType=0 controllerNumber=1 scan=5366	21.3854
12220:4	3	K.SGNTFRPEVHLLPPPSEELALNELVTLTC[+57.021]LAR.G		C[+57]	894.227	4	3573.89	3573.87	0	3.5	222	Specific	46.64	46.64	46.64	0.68	41	>sp|P01876|IGHA1_HUMAN Immunoglobulin heavy constant alpha 1 OS=Homo sapiens GN=IGHA1 PE=1 SV=2	11916	File384_Scan14858	controllerType=0 controllerNumber=1 scan=14858	42.3202
12793:2	3	R.WLQGSQELPR.E			607.32	2	1213.63	1213.63	0	0.9	264	Specific	44.98	44.98	44.98	1.67	41	>sp|P01876|IGHA1_HUMAN Immunoglobulin heavy constant alpha 1 OS=Homo sapiens GN=IGHA1 PE=1 SV=2	11916	File384_Scan15784	controllerType=0 controllerNumber=1 scan=15784	45.8572
12939:2	3	R.WLQGSQELPR.E			607.322	2	1213.64	1213.63	0	3.1	264	Specific	65.97	65.97	65.97	1.29	41	>sp|P01876|IGHA1_HUMAN Immunoglobulin heavy constant alpha 1 OS=Homo sapiens GN=IGHA1 PE=1 SV=2	11916	File384_Scan16013	controllerType=0 controllerNumber=1 scan=16013	46.6646
13897:2	3	R.WLQGSQELPR.E			607.321	2	1213.64	1213.63	0	2.3	264	Specific	88.72	43.93	43.93	1.52	41	>sp|P01876|IGHA1_HUMAN Immunoglobulin heavy constant alpha 1 OS=Homo sapiens GN=IGHA1 PE=1 SV=2	11916	File384_Scan17100	controllerType=0 controllerNumber=1 scan=17100	49.1771
12856:2	3	R.WLQGSQELPR.E			607.32	2	1213.63	1213.63	0	-0.1	264	Specific	126.49	92.82	92.82	2.28	41	>sp|P01876|IGHA1_HUMAN Immunoglobulin heavy constant alpha 1 OS=Homo sapiens GN=IGHA1 PE=1 SV=2	11916	File384_Scan15888	controllerType=0 controllerNumber=1 scan=15888	46.2475
13279:2	3	R.WLQGSQELPR.E			607.32	2	1213.63	1213.63	0	1	264	Specific	133.95	119.41	119.41	2.51	41	>sp|P01876|IGHA1_HUMAN Immunoglobulin heavy constant alpha 1 OS=Homo sapiens GN=IGHA1 PE=1 SV=2	11916	File384_Scan16417	controllerType=0 controllerNumber=1 scan=16417	47.6967
13086:2	3	R.WLQGSQELPR.E			607.321	2	1213.63	1213.63	0	1.3	264	Specific	134.28	82.54	82.54	2.58	41	>sp|P01876|IGHA1_HUMAN Immunoglobulin heavy constant alpha 1 OS=Homo sapiens GN=IGHA1 PE=1 SV=2	11916	File384_Scan16185	controllerType=0 controllerNumber=1 scan=16185	47.0973
10280:2	3	R.WLQGSQELPR.E			607.321	2	1213.63	1213.63	0	1.6	264	Specific	158.22	62.39	62.39	2.21	41	>sp|P01876|IGHA1_HUMAN Immunoglobulin heavy constant alpha 1 OS=Homo sapiens GN=IGHA1 PE=1 SV=2	11916	File384_Scan12674	controllerType=0 controllerNumber=1 scan=12674	37.4759
13403:2	3	R.WLQGSQELPR.E			607.32	2	1213.63	1213.63	0	0.2	264	Specific	165.92	127.87	127.87	2.72	41	>sp|P01876|IGHA1_HUMAN Immunoglobulin heavy constant alpha 1 OS=Homo sapiens GN=IGHA1 PE=1 SV=2	11916	File384_Scan16548	controllerType=0 controllerNumber=1 scan=16548	47.9644
13835:2	3	R.WLQGSQELPR.E			607.32	2	1213.63	1213.63	0	0.4	264	Specific	166.41	55.58	55.58	1.84	41	>sp|P01876|IGHA1_HUMAN Immunoglobulin heavy constant alpha 1 OS=Homo sapiens GN=IGHA1 PE=1 SV=2	11916	File384_Scan17026	controllerType=0 controllerNumber=1 scan=17026	48.9855
13136:2	3	R.WLQGSQELPR.E			607.32	2	1213.63	1213.63	0	0.3	264	Specific	175.06	151.09	151.09	3.73	41	>sp|P01876|IGHA1_HUMAN Immunoglobulin heavy constant alpha 1 OS=Homo sapiens GN=IGHA1 PE=1 SV=2	11916	File384_Scan16249	controllerType=0 controllerNumber=1 scan=16249	47.2772
05474:2	3	R.WLQGSQELPR.E			607.32	2	1213.63	1213.63	0	0.2	264	Specific	190.9	44.27	44.27	1.46	41	>sp|P01876|IGHA1_HUMAN Immunoglobulin heavy constant alpha 1 OS=Homo sapiens GN=IGHA1 PE=1 SV=2	11916	File384_Scan7599	controllerType=0 controllerNumber=1 scan=7599	26.7764
13634:2	3	R.WLQGSQELPR.E			607.32	2	1213.63	1213.63	0	1	264	Specific	195.85	124.88	124.88	2.91	41	>sp|P01876|IGHA1_HUMAN Immunoglobulin heavy constant alpha 1 OS=Homo sapiens GN=IGHA1 PE=1 SV=2	11916	File384_Scan16798	controllerType=0 controllerNumber=1 scan=16798	48.4857
13755:2	3	R.WLQGSQELPR.E			607.321	2	1213.63	1213.63	0	1.2	264	Specific	199.64	140.53	140.53	3.42	41	>sp|P01876|IGHA1_HUMAN Immunoglobulin heavy constant alpha 1 OS=Homo sapiens GN=IGHA1 PE=1 SV=2	11916	File384_Scan16936	controllerType=0 controllerNumber=1 scan=16936	48.7803
13025:2	3	R.WLQGSQELPR.E			607.321	2	1213.63	1213.63	0	1.1	264	Specific	219.59	192.45	192.45	4.55	41	>sp|P01876|IGHA1_HUMAN Immunoglobulin heavy constant alpha 1 OS=Homo sapiens GN=IGHA1 PE=1 SV=2	11916	File384_Scan16114	controllerType=0 controllerNumber=1 scan=16114	46.9179
13193:2	3	R.WLQGSQELPR.E			607.321	2	1213.63	1213.63	0	2.1	264	Specific	251.84	181.07	181.07	5.76	41	>sp|P01876|IGHA1_HUMAN Immunoglobulin heavy constant alpha 1 OS=Homo sapiens GN=IGHA1 PE=1 SV=2	11916	File384_Scan16321	controllerType=0 controllerNumber=1 scan=16321	47.4775
13527:2	3	R.WLQGSQELPR.E			607.321	2	1213.63	1213.63	0	1.4	264	Specific	257.85	133.75	133.75	4.59	41	>sp|P01876|IGHA1_HUMAN Immunoglobulin heavy constant alpha 1 OS=Homo sapiens GN=IGHA1 PE=1 SV=2	11916	File384_Scan16681	controllerType=0 controllerNumber=1 scan=16681	48.2426
11774:2	3	R.WLQGSQELPR.E			607.321	2	1213.63	1213.63	0	1.7	264	Specific	263.19	185.09	185.09	6.11	41	>sp|P01876|IGHA1_HUMAN Immunoglobulin heavy constant alpha 1 OS=Homo sapiens GN=IGHA1 PE=1 SV=2	11916	File384_Scan14305	controllerType=0 controllerNumber=1 scan=14305	41.0603
05360:2	3	R.WLQGSQELPR.E			607.319	2	1213.63	1213.63	0	-1.3	264	Specific	421.27	198	198	5.47	41	>sp|P01876|IGHA1_HUMAN Immunoglobulin heavy constant alpha 1 OS=Homo sapiens GN=IGHA1 PE=1 SV=2	11916	File384_Scan7478	controllerType=0 controllerNumber=1 scan=7478	26.498
05649:2	3	R.WLQGSQELPR.E			607.32	2	1213.63	1213.63	0	1	264	Specific	471.04	241.22	241.22	6.85	41	>sp|P01876|IGHA1_HUMAN Immunoglobulin heavy constant alpha 1 OS=Homo sapiens GN=IGHA1 PE=1 SV=2	11916	File384_Scan7786	controllerType=0 controllerNumber=1 scan=7786	27.2095
05239:2	3	R.WLQGSQELPR.E			607.32	2	1213.63	1213.63	0	-0.4	264	Specific	474.78	261.4	261.4	6.61	41	>sp|P01876|IGHA1_HUMAN Immunoglobulin heavy constant alpha 1 OS=Homo sapiens GN=IGHA1 PE=1 SV=2	11916	File384_Scan7352	controllerType=0 controllerNumber=1 scan=7352	26.2039
05036:2	3	R.WLQGSQELPR.E			607.32	2	1213.63	1213.63	0	0.1	264	Specific	493.84	307.09	307.09	7.95	41	>sp|P01876|IGHA1_HUMAN Immunoglobulin heavy constant alpha 1 OS=Homo sapiens GN=IGHA1 PE=1 SV=2	11916	File384_Scan7141	controllerType=0 controllerNumber=1 scan=7141	25.671
05133:2	3	R.WLQGSQELPR.E			607.32	2	1213.63	1213.63	0	0.7	264	Specific	503.73	299.47	299.47	7.59	41	>sp|P01876|IGHA1_HUMAN Immunoglobulin heavy constant alpha 1 OS=Homo sapiens GN=IGHA1 PE=1 SV=2	11916	File384_Scan7242	controllerType=0 controllerNumber=1 scan=7242	25.9311
04926:2	3	R.WLQGSQELPR.E			607.32	2	1213.63	1213.63	0	0.4	264	Specific	505.56	318.68	318.68	7.52	41	>sp|P01876|IGHA1_HUMAN Immunoglobulin heavy constant alpha 1 OS=Homo sapiens GN=IGHA1 PE=1 SV=2	11916	File384_Scan7027	controllerType=0 controllerNumber=1 scan=7027	25.3998
04822:2	3	R.WLQGSQELPR.E			607.32	2	1213.63	1213.63	0	0.6	264	Specific	514.92	290.21	290.21	7.59	41	>sp|P01876|IGHA1_HUMAN Immunoglobulin heavy constant alpha 1 OS=Homo sapiens GN=IGHA1 PE=1 SV=2	11916	File384_Scan6919	controllerType=0 controllerNumber=1 scan=6919	25.1289
04599:2	3	R.WLQGSQELPR.E			607.322	2	1213.64	1213.63	0	2.7	264	Specific	544.4	324.44	324.44	8.34	41	>sp|P01876|IGHA1_HUMAN Immunoglobulin heavy constant alpha 1 OS=Homo sapiens GN=IGHA1 PE=1 SV=2	11916	File384_Scan6683	controllerType=0 controllerNumber=1 scan=6683	24.5456
04714:2	3	R.WLQGSQELPR.E			607.318	2	1213.63	1213.63	0	-2.8	264	Specific	560.61	327.76	327.76	8.05	41	>sp|P01876|IGHA1_HUMAN Immunoglobulin heavy constant alpha 1 OS=Homo sapiens GN=IGHA1 PE=1 SV=2	11916	File384_Scan6807	controllerType=0 controllerNumber=1 scan=6807	24.8331
04521:2	3	R.WLQGSQELPR.E			607.32	2	1213.63	1213.63	0	1	264	Specific	561.65	290.94	290.94	7.86	41	>sp|P01876|IGHA1_HUMAN Immunoglobulin heavy constant alpha 1 OS=Homo sapiens GN=IGHA1 PE=1 SV=2	11916	File384_Scan6591	controllerType=0 controllerNumber=1 scan=6591	24.3151
13064:2	3	K.YLTWASR.Q			448.735	2	896.462	896.462	0	0	276	Specific	46.5	44.67	44.67	0.56	41	>sp|P01876|IGHA1_HUMAN Immunoglobulin heavy constant alpha 1 OS=Homo sapiens GN=IGHA1 PE=1 SV=2	11916	File384_Scan16159	controllerType=0 controllerNumber=1 scan=16159	47.0309
13149:2	3	K.YLTWASR.Q			448.735	2	896.462	896.462	0	-0.3	276	Specific	59.75	31.81	31.81	0.59	41	>sp|P01876|IGHA1_HUMAN Immunoglobulin heavy constant alpha 1 OS=Homo sapiens GN=IGHA1 PE=1 SV=2	11916	File384_Scan16266	controllerType=0 controllerNumber=1 scan=16266	47.3277
13125:2	3	K.YLTWASR.Q			448.735	2	896.463	896.462	0	0.1	276	Specific	68.35	62.29	62.29	1.37	41	>sp|P01876|IGHA1_HUMAN Immunoglobulin heavy constant alpha 1 OS=Homo sapiens GN=IGHA1 PE=1 SV=2	11916	File384_Scan16236	controllerType=0 controllerNumber=1 scan=16236	47.2454
13153:2	3	K.YLTWASR.Q			448.735	2	896.462	896.462	0	-0.6	276	Specific	114.37	85.19	85.19	1.58	41	>sp|P01876|IGHA1_HUMAN Immunoglobulin heavy constant alpha 1 OS=Homo sapiens GN=IGHA1 PE=1 SV=2	11916	File384_Scan16273	controllerType=0 controllerNumber=1 scan=16273	47.3526
05194:2	3	K.YLTWASR.Q			448.735	2	896.462	896.462	0	-0.1	276	Specific	351.6	136.9	136.9	2.92	41	>sp|P01876|IGHA1_HUMAN Immunoglobulin heavy constant alpha 1 OS=Homo sapiens GN=IGHA1 PE=1 SV=2	11916	File384_Scan7305	controllerType=0 controllerNumber=1 scan=7305	26.0802
05331:2	3	K.YLTWASR.Q			448.735	2	896.463	896.462	0	0.2	276	Specific	382.08	138.7	138.7	4.11	41	>sp|P01876|IGHA1_HUMAN Immunoglobulin heavy constant alpha 1 OS=Homo sapiens GN=IGHA1 PE=1 SV=2	11916	File384_Scan7448	controllerType=0 controllerNumber=1 scan=7448	26.4256
05043:2	3	K.YLTWASR.Q			448.735	2	896.462	896.462	0	-0.1	276	Specific	386.58	190.47	190.47	4.62	41	>sp|P01876|IGHA1_HUMAN Immunoglobulin heavy constant alpha 1 OS=Homo sapiens GN=IGHA1 PE=1 SV=2	11916	File384_Scan7148	controllerType=0 controllerNumber=1 scan=7148	25.686
04916:2	3	K.YLTWASR.Q			448.735	2	896.463	896.462	0	0.1	276	Specific	411.76	173.43	173.43	5.19	41	>sp|P01876|IGHA1_HUMAN Immunoglobulin heavy constant alpha 1 OS=Homo sapiens GN=IGHA1 PE=1 SV=2	11916	File384_Scan7016	controllerType=0 controllerNumber=1 scan=7016	25.3756
04800:2	3	K.YLTWASR.Q			448.735	2	896.463	896.462	0	0.7	276	Specific	413.04	178.28	178.28	4.72	41	>sp|P01876|IGHA1_HUMAN Immunoglobulin heavy constant alpha 1 OS=Homo sapiens GN=IGHA1 PE=1 SV=2	11916	File384_Scan6896	controllerType=0 controllerNumber=1 scan=6896	25.0773
04684:2	3	K.YLTWASR.Q			448.735	2	896.463	896.462	0	0.7	276	Specific	421.87	152.59	152.59	4.66	41	>sp|P01876|IGHA1_HUMAN Immunoglobulin heavy constant alpha 1 OS=Homo sapiens GN=IGHA1 PE=1 SV=2	11916	File384_Scan6776	controllerType=0 controllerNumber=1 scan=6776	24.7462
04583:2	3	K.YLTWASR.Q			448.734	2	896.461	896.462	0	-1.7	276	Specific	433.51	150.2	150.2	3.53	41	>sp|P01876|IGHA1_HUMAN Immunoglobulin heavy constant alpha 1 OS=Homo sapiens GN=IGHA1 PE=1 SV=2	11916	File384_Scan6662	controllerType=0 controllerNumber=1 scan=6662	24.4937
11031:3	3	R.QEPSQGTTTFAVTSILR.V			612.654	3	1835.95	1835.95	0	-0.4	283	Specific	23.06	23.06	23.06	1.82	41	>sp|P01876|IGHA1_HUMAN Immunoglobulin heavy constant alpha 1 OS=Homo sapiens GN=IGHA1 PE=1 SV=2	11916	File384_Scan13464	controllerType=0 controllerNumber=1 scan=13464	39.0505
13460:3	3	R.QEPSQGTTTFAVTSILR.V			612.656	3	1835.95	1835.95	0	1.6	283	Specific	32.31	32.31	32.31	1.78	41	>sp|P01876|IGHA1_HUMAN Immunoglobulin heavy constant alpha 1 OS=Homo sapiens GN=IGHA1 PE=1 SV=2	11916	File384_Scan16608	controllerType=0 controllerNumber=1 scan=16608	48.0829
12554:2	3	R.QEPSQGTTTFAVTSILR.V			918.479	2	1835.95	1835.95	0	0.7	283	Specific	41.76	41.76	41.76	2.16	41	>sp|P01876|IGHA1_HUMAN Immunoglobulin heavy constant alpha 1 OS=Homo sapiens GN=IGHA1 PE=1 SV=2	11916	File384_Scan15264	controllerType=0 controllerNumber=1 scan=15264	43.3801
12268:2	3	R.QEPSQGTTTFAVTSILR.V			918.481	2	1835.96	1835.95	0	3	283	Specific	51.17	51.17	51.17	1.81	41	>sp|P01876|IGHA1_HUMAN Immunoglobulin heavy constant alpha 1 OS=Homo sapiens GN=IGHA1 PE=1 SV=2	11916	File384_Scan14909	controllerType=0 controllerNumber=1 scan=14909	42.424
11990:3	3	R.QEPSQGTTTFAVTSILR.V			612.655	3	1835.95	1835.95	0	1.1	283	Specific	64.57	64.57	64.57	2.79	41	>sp|P01876|IGHA1_HUMAN Immunoglobulin heavy constant alpha 1 OS=Homo sapiens GN=IGHA1 PE=1 SV=2	11916	File384_Scan14559	controllerType=0 controllerNumber=1 scan=14559	41.6321
13137:2	3	R.QEPSQGTTTFAVTSILR.V			918.48	2	1835.95	1835.95	0	1.1	283	Specific	64.86	64.86	64.86	2.57	41	>sp|P01876|IGHA1_HUMAN Immunoglobulin heavy constant alpha 1 OS=Homo sapiens GN=IGHA1 PE=1 SV=2	11916	File384_Scan16251	controllerType=0 controllerNumber=1 scan=16251	47.2825
13603:2	3	R.QEPSQGTTTFAVTSILR.V			918.48	2	1835.95	1835.95	0	1.7	283	Specific	67.23	67.23	67.23	2.29	41	>sp|P01876|IGHA1_HUMAN Immunoglobulin heavy constant alpha 1 OS=Homo sapiens GN=IGHA1 PE=1 SV=2	11916	File384_Scan16766	controllerType=0 controllerNumber=1 scan=16766	48.4239
09186:3	3	R.QEPSQGTTTFAVTSILR.V			612.655	3	1835.95	1835.95	0	0.7	283	Specific	108.02	43.55	43.55	1.58	41	>sp|P01876|IGHA1_HUMAN Immunoglobulin heavy constant alpha 1 OS=Homo sapiens GN=IGHA1 PE=1 SV=2	11916	File384_Scan11514	controllerType=0 controllerNumber=1 scan=11514	35.0318
12879:2	3	R.QEPSQGTTTFAVTSILR.V			918.479	2	1835.95	1835.95	0	0.3	283	Specific	109.85	109.85	109.85	3.47	41	>sp|P01876|IGHA1_HUMAN Immunoglobulin heavy constant alpha 1 OS=Homo sapiens GN=IGHA1 PE=1 SV=2	11916	File384_Scan15927	controllerType=0 controllerNumber=1 scan=15927	46.3889
12819:2	3	R.QEPSQGTTTFAVTSILR.V			918.479	2	1835.95	1835.95	0	0.7	283	Specific	122.22	122.22	122.22	3.57	41	>sp|P01876|IGHA1_HUMAN Immunoglobulin heavy constant alpha 1 OS=Homo sapiens GN=IGHA1 PE=1 SV=2	11916	File384_Scan15830	controllerType=0 controllerNumber=1 scan=15830	46.0392
13270:2	3	R.QEPSQGTTTFAVTSILR.V			918.479	2	1835.95	1835.95	0	0.3	283	Specific	123.83	123.83	123.83	3.68	41	>sp|P01876|IGHA1_HUMAN Immunoglobulin heavy constant alpha 1 OS=Homo sapiens GN=IGHA1 PE=1 SV=2	11916	File384_Scan16407	controllerType=0 controllerNumber=1 scan=16407	47.6744
13192:2	3	R.QEPSQGTTTFAVTSILR.V			918.479	2	1835.95	1835.95	0	0.9	283	Specific	124.7	124.7	124.7	3.68	41	>sp|P01876|IGHA1_HUMAN Immunoglobulin heavy constant alpha 1 OS=Homo sapiens GN=IGHA1 PE=1 SV=2	11916	File384_Scan16320	controllerType=0 controllerNumber=1 scan=16320	47.4731
09910:3	3	R.QEPSQGTTTFAVTSILR.V			612.656	3	1835.95	1835.95	0	1.3	283	Specific	142.13	142.13	142.13	3.43	41	>sp|P01876|IGHA1_HUMAN Immunoglobulin heavy constant alpha 1 OS=Homo sapiens GN=IGHA1 PE=1 SV=2	11916	File384_Scan12280	controllerType=0 controllerNumber=1 scan=12280	36.6515
10157:3	3	R.QEPSQGTTTFAVTSILR.V			612.655	3	1835.95	1835.95	0	1.2	283	Specific	151.16	151.16	151.16	3.43	41	>sp|P01876|IGHA1_HUMAN Immunoglobulin heavy constant alpha 1 OS=Homo sapiens GN=IGHA1 PE=1 SV=2	11916	File384_Scan12541	controllerType=0 controllerNumber=1 scan=12541	37.2027
13477:2	3	R.QEPSQGTTTFAVTSILR.V			918.48	2	1835.95	1835.95	0	1.4	283	Specific	163.46	163.46	163.46	4.9	41	>sp|P01876|IGHA1_HUMAN Immunoglobulin heavy constant alpha 1 OS=Homo sapiens GN=IGHA1 PE=1 SV=2	11916	File384_Scan16626	controllerType=0 controllerNumber=1 scan=16626	48.1253
11283:2	3	R.QEPSQGTTTFAVTSILR.V			918.48	2	1835.95	1835.95	0	1.3	283	Specific	165.62	165.62	165.62	4.9	41	>sp|P01876|IGHA1_HUMAN Immunoglobulin heavy constant alpha 1 OS=Homo sapiens GN=IGHA1 PE=1 SV=2	11916	File384_Scan13728	controllerType=0 controllerNumber=1 scan=13728	39.6165
12848:2	3	R.QEPSQGTTTFAVTSILR.V			918.479	2	1835.95	1835.95	0	0.7	283	Specific	167.42	167.42	167.42	4.96	41	>sp|P01876|IGHA1_HUMAN Immunoglobulin heavy constant alpha 1 OS=Homo sapiens GN=IGHA1 PE=1 SV=2	11916	File384_Scan15877	controllerType=0 controllerNumber=1 scan=15877	46.2123
10187:2	3	R.QEPSQGTTTFAVTSILR.V			918.48	2	1835.95	1835.95	0	1.5	283	Specific	194.54	115.79	115.79	2.3	41	>sp|P01876|IGHA1_HUMAN Immunoglobulin heavy constant alpha 1 OS=Homo sapiens GN=IGHA1 PE=1 SV=2	11916	File384_Scan12575	controllerType=0 controllerNumber=1 scan=12575	37.277
10035:3	3	R.QEPSQGTTTFAVTSILR.V			612.655	3	1835.95	1835.95	0	0.5	283	Specific	197.46	176.92	176.92	3.22	41	>sp|P01876|IGHA1_HUMAN Immunoglobulin heavy constant alpha 1 OS=Homo sapiens GN=IGHA1 PE=1 SV=2	11916	File384_Scan12411	controllerType=0 controllerNumber=1 scan=12411	36.9337
12378:2	3	R.QEPSQGTTTFAVTSILR.V			918.48	2	1835.95	1835.95	0	2.1	283	Specific	219.19	219.19	219.19	5.93	41	>sp|P01876|IGHA1_HUMAN Immunoglobulin heavy constant alpha 1 OS=Homo sapiens GN=IGHA1 PE=1 SV=2	11916	File384_Scan15027	controllerType=0 controllerNumber=1 scan=15027	42.654
13089:2	3	R.QEPSQGTTTFAVTSILR.V			918.48	2	1835.95	1835.95	0	1.5	283	Specific	230.08	230.08	230.08	7.04	41	>sp|P01876|IGHA1_HUMAN Immunoglobulin heavy constant alpha 1 OS=Homo sapiens GN=IGHA1 PE=1 SV=2	11916	File384_Scan16189	controllerType=0 controllerNumber=1 scan=16189	47.1058
11623:2	3	R.QEPSQGTTTFAVTSILR.V			918.479	2	1835.95	1835.95	0	0.9	283	Specific	245.31	245.31	245.31	7.06	41	>sp|P01876|IGHA1_HUMAN Immunoglobulin heavy constant alpha 1 OS=Homo sapiens GN=IGHA1 PE=1 SV=2	11916	File384_Scan14119	controllerType=0 controllerNumber=1 scan=14119	40.5898
11539:2	3	R.QEPSQGTTTFAVTSILR.V			918.479	2	1835.95	1835.95	0	0.8	283	Specific	248.19	248.19	248.19	7.06	41	>sp|P01876|IGHA1_HUMAN Immunoglobulin heavy constant alpha 1 OS=Homo sapiens GN=IGHA1 PE=1 SV=2	11916	File384_Scan14010	controllerType=0 controllerNumber=1 scan=14010	40.296
12960:2	3	R.QEPSQGTTTFAVTSILR.V			918.479	2	1835.95	1835.95	0	0.3	283	Specific	250.41	250.41	250.41	7.06	41	>sp|P01876|IGHA1_HUMAN Immunoglobulin heavy constant alpha 1 OS=Homo sapiens GN=IGHA1 PE=1 SV=2	11916	File384_Scan16040	controllerType=0 controllerNumber=1 scan=16040	46.74
12504:2	3	R.QEPSQGTTTFAVTSILR.V			918.479	2	1835.95	1835.95	0	0.6	283	Specific	262.25	262.25	262.25	7.41	41	>sp|P01876|IGHA1_HUMAN Immunoglobulin heavy constant alpha 1 OS=Homo sapiens GN=IGHA1 PE=1 SV=2	11916	File384_Scan15178	controllerType=0 controllerNumber=1 scan=15178	43.0289
10938:2	3	R.QEPSQGTTTFAVTSILR.V			918.48	2	1835.95	1835.95	0	1.9	283	Specific	266.01	266.01	266.01	7.56	41	>sp|P01876|IGHA1_HUMAN Immunoglobulin heavy constant alpha 1 OS=Homo sapiens GN=IGHA1 PE=1 SV=2	11916	File384_Scan13367	controllerType=0 controllerNumber=1 scan=13367	38.8635
11942:2	3	R.QEPSQGTTTFAVTSILR.V			918.48	2	1835.95	1835.95	0	1.2	283	Specific	283.57	283.57	283.57	7.67	41	>sp|P01876|IGHA1_HUMAN Immunoglobulin heavy constant alpha 1 OS=Homo sapiens GN=IGHA1 PE=1 SV=2	11916	File384_Scan14497	controllerType=0 controllerNumber=1 scan=14497	41.4919
11042:2	3	R.QEPSQGTTTFAVTSILR.V			918.48	2	1835.95	1835.95	0	1.2	283	Specific	284.67	284.67	284.67	7.67	41	>sp|P01876|IGHA1_HUMAN Immunoglobulin heavy constant alpha 1 OS=Homo sapiens GN=IGHA1 PE=1 SV=2	11916	File384_Scan13476	controllerType=0 controllerNumber=1 scan=13476	39.0748
09724:3	3	R.QEPSQGTTTFAVTSILR.V			612.655	3	1835.95	1835.95	0	0.9	283	Specific	288.24	288.24	288.24	7.61	41	>sp|P01876|IGHA1_HUMAN Immunoglobulin heavy constant alpha 1 OS=Homo sapiens GN=IGHA1 PE=1 SV=2	11916	File384_Scan12081	controllerType=0 controllerNumber=1 scan=12081	36.2326
13029:2	3	R.QEPSQGTTTFAVTSILR.V			918.48	2	1835.95	1835.95	0	1.3	283	Specific	288.4	288.4	288.4	7.67	41	>sp|P01876|IGHA1_HUMAN Immunoglobulin heavy constant alpha 1 OS=Homo sapiens GN=IGHA1 PE=1 SV=2	11916	File384_Scan16119	controllerType=0 controllerNumber=1 scan=16119	46.9293
11170:2	3	R.QEPSQGTTTFAVTSILR.V			918.483	2	1835.96	1835.95	0	4.4	283	Specific	325.16	325.16	325.16	6.57	41	>sp|P01876|IGHA1_HUMAN Immunoglobulin heavy constant alpha 1 OS=Homo sapiens GN=IGHA1 PE=1 SV=2	11916	File384_Scan13610	controllerType=0 controllerNumber=1 scan=13610	39.3611
11721:2	3	R.QEPSQGTTTFAVTSILR.V			918.479	2	1835.95	1835.95	0	0.8	283	Specific	335.68	335.68	335.68	7.88	41	>sp|P01876|IGHA1_HUMAN Immunoglobulin heavy constant alpha 1 OS=Homo sapiens GN=IGHA1 PE=1 SV=2	11916	File384_Scan14239	controllerType=0 controllerNumber=1 scan=14239	40.9021
13372:2	3	R.QEPSQGTTTFAVTSILR.V			918.481	2	1835.96	1835.95	0	3	283	Specific	345	343.26	343.26	7.69	41	>sp|P01876|IGHA1_HUMAN Immunoglobulin heavy constant alpha 1 OS=Homo sapiens GN=IGHA1 PE=1 SV=2	11916	File384_Scan16515	controllerType=0 controllerNumber=1 scan=16515	47.897
10407:2	3	R.QEPSQGTTTFAVTSILR.V			918.482	2	1835.96	1835.95	0	3.3	283	Specific	368	341.03	341.03	7.07	41	>sp|P01876|IGHA1_HUMAN Immunoglobulin heavy constant alpha 1 OS=Homo sapiens GN=IGHA1 PE=1 SV=2	11916	File384_Scan12808	controllerType=0 controllerNumber=1 scan=12808	37.7457
10287:2	3	R.QEPSQGTTTFAVTSILR.V			918.479	2	1835.95	1835.95	0	0.5	283	Specific	412.66	343.93	343.93	7.56	41	>sp|P01876|IGHA1_HUMAN Immunoglobulin heavy constant alpha 1 OS=Homo sapiens GN=IGHA1 PE=1 SV=2	11916	File384_Scan12682	controllerType=0 controllerNumber=1 scan=12682	37.496
10608:2	3	R.QEPSQGTTTFAVTSILR.V			918.48	2	1835.95	1835.95	0	1.7	283	Specific	418.9	377.71	377.71	8.8	41	>sp|P01876|IGHA1_HUMAN Immunoglobulin heavy constant alpha 1 OS=Homo sapiens GN=IGHA1 PE=1 SV=2	11916	File384_Scan13019	controllerType=0 controllerNumber=1 scan=13019	38.1688
10505:2	3	R.QEPSQGTTTFAVTSILR.V			918.48	2	1835.95	1835.95	0	1.3	283	Specific	437.56	435.85	435.85	9.89	41	>sp|P01876|IGHA1_HUMAN Immunoglobulin heavy constant alpha 1 OS=Homo sapiens GN=IGHA1 PE=1 SV=2	11916	File384_Scan12911	controllerType=0 controllerNumber=1 scan=12911	37.9566
10730:2	3	R.QEPSQGTTTFAVTSILR.V			918.483	2	1835.96	1835.95	0	4.5	283	Specific	438.23	431.87	431.87	8.44	41	>sp|P01876|IGHA1_HUMAN Immunoglobulin heavy constant alpha 1 OS=Homo sapiens GN=IGHA1 PE=1 SV=2	11916	File384_Scan13147	controllerType=0 controllerNumber=1 scan=13147	38.4263
07315:2	3	R.QEPSQGTTTFAVTSILR.V			918.48	2	1835.95	1835.95	0	2.1	283	Specific	466.98	466.98	466.98	10.11	41	>sp|P01876|IGHA1_HUMAN Immunoglobulin heavy constant alpha 1 OS=Homo sapiens GN=IGHA1 PE=1 SV=2	11916	File384_Scan9539	controllerType=0 controllerNumber=1 scan=9539	31.0013
09176:3	3	R.QEPSQGTTTFAVTSILR.V			612.655	3	1835.95	1835.95	0	0.7	283	Specific	468.21	468.21	468.21	10.05	41	>sp|P01876|IGHA1_HUMAN Immunoglobulin heavy constant alpha 1 OS=Homo sapiens GN=IGHA1 PE=1 SV=2	11916	File384_Scan11504	controllerType=0 controllerNumber=1 scan=11504	35.0084
10835:2	3	R.QEPSQGTTTFAVTSILR.V			918.478	2	1835.95	1835.95	0	-0.7	283	Specific	491.69	491.69	491.69	9.78	41	>sp|P01876|IGHA1_HUMAN Immunoglobulin heavy constant alpha 1 OS=Homo sapiens GN=IGHA1 PE=1 SV=2	11916	File384_Scan13259	controllerType=0 controllerNumber=1 scan=13259	38.6517
08858:3	3	R.QEPSQGTTTFAVTSILR.V			612.655	3	1835.95	1835.95	0	0.4	283	Specific	492.47	492.47	492.47	10.09	41	>sp|P01876|IGHA1_HUMAN Immunoglobulin heavy constant alpha 1 OS=Homo sapiens GN=IGHA1 PE=1 SV=2	11916	File384_Scan11170	controllerType=0 controllerNumber=1 scan=11170	34.2968
09916:2	3	R.QEPSQGTTTFAVTSILR.V			918.48	2	1835.95	1835.95	0	1.7	283	Specific	503.01	451.14	451.14	10.31	41	>sp|P01876|IGHA1_HUMAN Immunoglobulin heavy constant alpha 1 OS=Homo sapiens GN=IGHA1 PE=1 SV=2	11916	File384_Scan12287	controllerType=0 controllerNumber=1 scan=12287	36.6728
09321:3	3	R.QEPSQGTTTFAVTSILR.V			612.654	3	1835.95	1835.95	0	-1.1	283	Specific	503.93	503.93	503.93	9.8	41	>sp|P01876|IGHA1_HUMAN Immunoglobulin heavy constant alpha 1 OS=Homo sapiens GN=IGHA1 PE=1 SV=2	11916	File384_Scan11655	controllerType=0 controllerNumber=1 scan=11655	35.3327
09809:2	3	R.QEPSQGTTTFAVTSILR.V			918.48	2	1835.95	1835.95	0	1.4	283	Specific	505.25	479.91	479.91	10.31	41	>sp|P01876|IGHA1_HUMAN Immunoglobulin heavy constant alpha 1 OS=Homo sapiens GN=IGHA1 PE=1 SV=2	11916	File384_Scan12173	controllerType=0 controllerNumber=1 scan=12173	36.4262
09710:2	3	R.QEPSQGTTTFAVTSILR.V			918.481	2	1835.96	1835.95	0	3.1	283	Specific	506.74	474.69	474.69	9.8	41	>sp|P01876|IGHA1_HUMAN Immunoglobulin heavy constant alpha 1 OS=Homo sapiens GN=IGHA1 PE=1 SV=2	11916	File384_Scan12067	controllerType=0 controllerNumber=1 scan=12067	36.2082
09607:2	3	R.QEPSQGTTTFAVTSILR.V			918.481	2	1835.96	1835.95	0	3.1	283	Specific	520.92	475.51	475.51	9.02	41	>sp|P01876|IGHA1_HUMAN Immunoglobulin heavy constant alpha 1 OS=Homo sapiens GN=IGHA1 PE=1 SV=2	11916	File384_Scan11957	controllerType=0 controllerNumber=1 scan=11957	35.9776
12025:2	3	R.QEPSQGTTTFAVTSILR.V			918.48	2	1835.95	1835.95	0	1.4	283	Specific	532.08	525.65	525.65	10.38	41	>sp|P01876|IGHA1_HUMAN Immunoglobulin heavy constant alpha 1 OS=Homo sapiens GN=IGHA1 PE=1 SV=2	11916	File384_Scan14598	controllerType=0 controllerNumber=1 scan=14598	41.7099
08406:2	3	R.QEPSQGTTTFAVTSILR.V			918.479	2	1835.95	1835.95	0	0.7	283	Specific	535.19	465.03	465.03	10.23	41	>sp|P01876|IGHA1_HUMAN Immunoglobulin heavy constant alpha 1 OS=Homo sapiens GN=IGHA1 PE=1 SV=2	11916	File384_Scan10686	controllerType=0 controllerNumber=1 scan=10686	33.3325
10023:2	3	R.QEPSQGTTTFAVTSILR.V			918.48	2	1835.95	1835.95	0	2.1	283	Specific	557.32	487.47	487.47	10.54	41	>sp|P01876|IGHA1_HUMAN Immunoglobulin heavy constant alpha 1 OS=Homo sapiens GN=IGHA1 PE=1 SV=2	11916	File384_Scan12399	controllerType=0 controllerNumber=1 scan=12399	36.9118
09078:3	3	R.QEPSQGTTTFAVTSILR.V			612.655	3	1835.95	1835.95	0	1	283	Specific	563.88	512.85	512.85	10.65	41	>sp|P01876|IGHA1_HUMAN Immunoglobulin heavy constant alpha 1 OS=Homo sapiens GN=IGHA1 PE=1 SV=2	11916	File384_Scan11401	controllerType=0 controllerNumber=1 scan=11401	34.7906
09509:2	3	R.QEPSQGTTTFAVTSILR.V			918.48	2	1835.95	1835.95	0	1.7	283	Specific	585.75	531.98	531.98	11.81	41	>sp|P01876|IGHA1_HUMAN Immunoglobulin heavy constant alpha 1 OS=Homo sapiens GN=IGHA1 PE=1 SV=2	11916	File384_Scan11853	controllerType=0 controllerNumber=1 scan=11853	35.7644
08972:3	3	R.QEPSQGTTTFAVTSILR.V			612.655	3	1835.95	1835.95	0	0.6	283	Specific	627.78	627.78	627.78	12.76	41	>sp|P01876|IGHA1_HUMAN Immunoglobulin heavy constant alpha 1 OS=Homo sapiens GN=IGHA1 PE=1 SV=2	11916	File384_Scan11290	controllerType=0 controllerNumber=1 scan=11290	34.5517
09240:2	3	R.QEPSQGTTTFAVTSILR.V			918.477	2	1835.95	1835.95	0	-1.6	283	Specific	638.1	587.12	587.12	12.21	41	>sp|P01876|IGHA1_HUMAN Immunoglobulin heavy constant alpha 1 OS=Homo sapiens GN=IGHA1 PE=1 SV=2	11916	File384_Scan11571	controllerType=0 controllerNumber=1 scan=11571	35.153
09136:2	3	R.QEPSQGTTTFAVTSILR.V			918.48	2	1835.95	1835.95	0	1.4	283	Specific	652.23	634.89	634.89	13.81	41	>sp|P01876|IGHA1_HUMAN Immunoglobulin heavy constant alpha 1 OS=Homo sapiens GN=IGHA1 PE=1 SV=2	11916	File384_Scan11462	controllerType=0 controllerNumber=1 scan=11462	34.9225
09027:2	3	R.QEPSQGTTTFAVTSILR.V			918.479	2	1835.95	1835.95	0	0.7	283	Specific	668.27	626.16	626.16	13.67	41	>sp|P01876|IGHA1_HUMAN Immunoglobulin heavy constant alpha 1 OS=Homo sapiens GN=IGHA1 PE=1 SV=2	11916	File384_Scan11348	controllerType=0 controllerNumber=1 scan=11348	34.6744
08868:3	3	R.QEPSQGTTTFAVTSILR.V			612.655	3	1835.95	1835.95	0	0.1	283	Specific	684.84	684.84	684.84	13.76	41	>sp|P01876|IGHA1_HUMAN Immunoglobulin heavy constant alpha 1 OS=Homo sapiens GN=IGHA1 PE=1 SV=2	11916	File384_Scan11181	controllerType=0 controllerNumber=1 scan=11181	34.3225
08623:2	3	R.QEPSQGTTTFAVTSILR.V			918.481	2	1835.95	1835.95	0	2.2	283	Specific	691.76	662.69	662.69	13.3	41	>sp|P01876|IGHA1_HUMAN Immunoglobulin heavy constant alpha 1 OS=Homo sapiens GN=IGHA1 PE=1 SV=2	11916	File384_Scan10921	controllerType=0 controllerNumber=1 scan=10921	33.7944
08825:2	3	R.QEPSQGTTTFAVTSILR.V			918.479	2	1835.95	1835.95	0	0.4	283	Specific	693.6	651.43	651.43	13.67	41	>sp|P01876|IGHA1_HUMAN Immunoglobulin heavy constant alpha 1 OS=Homo sapiens GN=IGHA1 PE=1 SV=2	11916	File384_Scan11136	controllerType=0 controllerNumber=1 scan=11136	34.2312
08926:2	3	R.QEPSQGTTTFAVTSILR.V			918.479	2	1835.95	1835.95	0	0.8	283	Specific	694.77	608.24	608.24	13.67	41	>sp|P01876|IGHA1_HUMAN Immunoglobulin heavy constant alpha 1 OS=Homo sapiens GN=IGHA1 PE=1 SV=2	11916	File384_Scan11242	controllerType=0 controllerNumber=1 scan=11242	34.4512
08520:2	3	R.QEPSQGTTTFAVTSILR.V			918.479	2	1835.95	1835.95	0	0.5	283	Specific	695.22	643.04	643.04	13.67	41	>sp|P01876|IGHA1_HUMAN Immunoglobulin heavy constant alpha 1 OS=Homo sapiens GN=IGHA1 PE=1 SV=2	11916	File384_Scan10807	controllerType=0 controllerNumber=1 scan=10807	33.5706
08726:2	3	R.QEPSQGTTTFAVTSILR.V			918.478	2	1835.95	1835.95	0	-0.9	283	Specific	703.77	677.64	677.64	14.21	41	>sp|P01876|IGHA1_HUMAN Immunoglobulin heavy constant alpha 1 OS=Homo sapiens GN=IGHA1 PE=1 SV=2	11916	File384_Scan11029	controllerType=0 controllerNumber=1 scan=11029	34.0117
08670:3	3	R.QEPSQGTTTFAVTSILR.V			612.655	3	1835.95	1835.95	0	1	283	Specific	724.96	724.96	724.96	14.76	41	>sp|P01876|IGHA1_HUMAN Immunoglobulin heavy constant alpha 1 OS=Homo sapiens GN=IGHA1 PE=1 SV=2	11916	File384_Scan10970	controllerType=0 controllerNumber=1 scan=10970	33.8983
08471:3	3	R.QEPSQGTTTFAVTSILR.V			612.655	3	1835.95	1835.95	0	-0.1	283	Specific	754.83	754.83	754.83	15.53	41	>sp|P01876|IGHA1_HUMAN Immunoglobulin heavy constant alpha 1 OS=Homo sapiens GN=IGHA1 PE=1 SV=2	11916	File384_Scan10754	controllerType=0 controllerNumber=1 scan=10754	33.4656
08567:3	3	R.QEPSQGTTTFAVTSILR.V			612.653	3	1835.95	1835.95	0	-2.3	283	Specific	756.97	756.97	756.97	14.93	41	>sp|P01876|IGHA1_HUMAN Immunoglobulin heavy constant alpha 1 OS=Homo sapiens GN=IGHA1 PE=1 SV=2	11916	File384_Scan10858	controllerType=0 controllerNumber=1 scan=10858	33.6702
02939:2	3	R.VAAEDWK.K			409.706	2	818.404	818.404	0	-0.2	300	Specific	278.24	69.38	69.38	2.61	41	>sp|P01876|IGHA1_HUMAN Immunoglobulin heavy constant alpha 1 OS=Homo sapiens GN=IGHA1 PE=1 SV=2	11916	File384_Scan4730	controllerType=0 controllerNumber=1 scan=4730	19.9894
02619:2	3	R.VAAEDWK.K			409.706	2	818.404	818.404	0	-0.3	300	Specific	302.41	142.81	142.81	3.99	41	>sp|P01876|IGHA1_HUMAN Immunoglobulin heavy constant alpha 1 OS=Homo sapiens GN=IGHA1 PE=1 SV=2	11916	File384_Scan4396	controllerType=0 controllerNumber=1 scan=4396	19.2001
02375:2	3	R.VAAEDWK.K			409.706	2	818.404	818.404	0	-0.1	300	Specific	317.6	158.54	158.54	4.55	41	>sp|P01876|IGHA1_HUMAN Immunoglobulin heavy constant alpha 1 OS=Homo sapiens GN=IGHA1 PE=1 SV=2	11916	File384_Scan4141	controllerType=0 controllerNumber=1 scan=4141	18.656
01816:2	3	R.VAAEDWK.K			409.706	2	818.405	818.404	0	0.7	300	Specific	335.87	114.12	114.12	3.73	41	>sp|P01876|IGHA1_HUMAN Immunoglobulin heavy constant alpha 1 OS=Homo sapiens GN=IGHA1 PE=1 SV=2	11916	File384_Scan3557	controllerType=0 controllerNumber=1 scan=3557	17.3313
02245:2	3	R.VAAEDWK.K			409.706	2	818.404	818.404	0	-0.5	300	Specific	337.81	131.23	131.23	3.62	41	>sp|P01876|IGHA1_HUMAN Immunoglobulin heavy constant alpha 1 OS=Homo sapiens GN=IGHA1 PE=1 SV=2	11916	File384_Scan4006	controllerType=0 controllerNumber=1 scan=4006	18.3222
02014:2	3	R.VAAEDWK.K			409.706	2	818.404	818.404	0	0.1	300	Specific	347.62	139.77	139.77	4.63	41	>sp|P01876|IGHA1_HUMAN Immunoglobulin heavy constant alpha 1 OS=Homo sapiens GN=IGHA1 PE=1 SV=2	11916	File384_Scan3765	controllerType=0 controllerNumber=1 scan=3765	17.7686
02127:2	3	R.VAAEDWK.K			409.705	2	818.403	818.404	0	-1.1	300	Specific	350.18	141.06	141.06	4.54	41	>sp|P01876|IGHA1_HUMAN Immunoglobulin heavy constant alpha 1 OS=Homo sapiens GN=IGHA1 PE=1 SV=2	11916	File384_Scan3883	controllerType=0 controllerNumber=1 scan=3883	18.0276
01810:2	3	R.VAAEDWK.K			409.706	2	818.405	818.404	0	0.7	300	Specific	358.84	125	125	4.21	41	>sp|P01876|IGHA1_HUMAN Immunoglobulin heavy constant alpha 1 OS=Homo sapiens GN=IGHA1 PE=1 SV=2	11916	File384_Scan3551	controllerType=0 controllerNumber=1 scan=3551	17.318
01911:2	3	R.VAAEDWK.K			409.706	2	818.404	818.404	0	-0.1	300	Specific	358.9	139.76	139.76	3.67	41	>sp|P01876|IGHA1_HUMAN Immunoglobulin heavy constant alpha 1 OS=Homo sapiens GN=IGHA1 PE=1 SV=2	11916	File384_Scan3657	controllerType=0 controllerNumber=1 scan=3657	17.5395
01700:2	3	R.VAAEDWK.K			409.706	2	818.404	818.404	0	-0.2	300	Specific	361.16	142.02	142.02	4.65	41	>sp|P01876|IGHA1_HUMAN Immunoglobulin heavy constant alpha 1 OS=Homo sapiens GN=IGHA1 PE=1 SV=2	11916	File384_Scan3435	controllerType=0 controllerNumber=1 scan=3435	17.085
13950:3	3	K.KGDTFSC[+57.021]M[+15.995]VGHEALPLAFTQK.T		C[+57], M[+16]	785.049	3	2353.13	2353.13	0	1	307	Specific	33.02	33.02	33.02	1.84	41	>sp|P01876|IGHA1_HUMAN Immunoglobulin heavy constant alpha 1 OS=Homo sapiens GN=IGHA1 PE=1 SV=2	11916	File384_Scan17178	controllerType=0 controllerNumber=1 scan=17178	49.4333
11224:4	3	K.KGDTFSC[+57.021]M[+15.995]VGHEALPLAFTQK.T		C[+57], M[+16]	589.039	4	2353.13	2353.13	0	0.6	307	Specific	38.5	38.5	38.5	2.22	41	>sp|P01876|IGHA1_HUMAN Immunoglobulin heavy constant alpha 1 OS=Homo sapiens GN=IGHA1 PE=1 SV=2	11916	File384_Scan13666	controllerType=0 controllerNumber=1 scan=13666	39.4834
11319:3	3	K.KGDTFSC[+57.021]M[+15.995]VGHEALPLAFTQK.T		C[+57], M[+16]	785.049	3	2353.13	2353.13	0	0.8	307	Specific	52.9	52.9	52.9	1.84	41	>sp|P01876|IGHA1_HUMAN Immunoglobulin heavy constant alpha 1 OS=Homo sapiens GN=IGHA1 PE=1 SV=2	11916	File384_Scan13765	controllerType=0 controllerNumber=1 scan=13765	39.6896
14018:4	3	K.KGDTFSC[+57.021]M[+15.995]VGHEALPLAFTQK.T		C[+57], M[+16]	589.039	4	2353.13	2353.13	0	1.4	307	Specific	60.4	60.4	60.4	2.93	41	>sp|P01876|IGHA1_HUMAN Immunoglobulin heavy constant alpha 1 OS=Homo sapiens GN=IGHA1 PE=1 SV=2	11916	File384_Scan17306	controllerType=0 controllerNumber=1 scan=17306	49.9873
11178:3	3	K.KGDTFSC[+57.021]M[+15.995]VGHEALPLAFTQK.T		C[+57], M[+16]	785.05	3	2353.14	2353.13	0	1.7	307	Specific	62.53	62.53	62.53	2.23	41	>sp|P01876|IGHA1_HUMAN Immunoglobulin heavy constant alpha 1 OS=Homo sapiens GN=IGHA1 PE=1 SV=2	11916	File384_Scan13618	controllerType=0 controllerNumber=1 scan=13618	39.3768
10943:4	3	K.KGDTFSC[+57.021]M[+15.995]VGHEALPLAFTQK.T		C[+57], M[+16]	589.04	4	2353.14	2353.13	0	2.2	307	Specific	67.52	67.52	67.52	2.73	41	>sp|P01876|IGHA1_HUMAN Immunoglobulin heavy constant alpha 1 OS=Homo sapiens GN=IGHA1 PE=1 SV=2	11916	File384_Scan13372	controllerType=0 controllerNumber=1 scan=13372	38.8713
10722:4	3	K.KGDTFSC[+57.021]M[+15.995]VGHEALPLAFTQK.T		C[+57], M[+16]	589.039	4	2353.13	2353.13	0	1.3	307	Specific	74.96	74.96	74.96	3.47	41	>sp|P01876|IGHA1_HUMAN Immunoglobulin heavy constant alpha 1 OS=Homo sapiens GN=IGHA1 PE=1 SV=2	11916	File384_Scan13138	controllerType=0 controllerNumber=1 scan=13138	38.4062
10029:3	3	K.KGDTFSC[+57.021]M[+15.995]VGHEALPLAFTQK.T		C[+57], M[+16]	785.05	3	2353.14	2353.13	0	1.7	307	Specific	78.26	78.26	78.26	1.84	41	>sp|P01876|IGHA1_HUMAN Immunoglobulin heavy constant alpha 1 OS=Homo sapiens GN=IGHA1 PE=1 SV=2	11916	File384_Scan12405	controllerType=0 controllerNumber=1 scan=12405	36.9224
11882:4	3	K.KGDTFSC[+57.021]M[+15.995]VGHEALPLAFTQK.T		C[+57], M[+16]	589.039	4	2353.13	2353.13	0	1.4	307	Specific	86.37	86.37	86.37	3.65	41	>sp|P01876|IGHA1_HUMAN Immunoglobulin heavy constant alpha 1 OS=Homo sapiens GN=IGHA1 PE=1 SV=2	11916	File384_Scan14431	controllerType=0 controllerNumber=1 scan=14431	41.3401
13998:4	3	K.KGDTFSC[+57.021]M[+15.995]VGHEALPLAFTQK.T		C[+57], M[+16]	589.039	4	2353.13	2353.13	0	0.4	307	Specific	99.15	99.15	99.15	3.72	41	>sp|P01876|IGHA1_HUMAN Immunoglobulin heavy constant alpha 1 OS=Homo sapiens GN=IGHA1 PE=1 SV=2	11916	File384_Scan17267	controllerType=0 controllerNumber=1 scan=17267	49.816
08977:3	3	K.KGDTFSC[+57.021]M[+15.995]VGHEALPLAFTQK.T		C[+57], M[+16]	785.05	3	2353.14	2353.13	0	1.7	307	Specific	102.85	102.85	102.85	2.76	41	>sp|P01876|IGHA1_HUMAN Immunoglobulin heavy constant alpha 1 OS=Homo sapiens GN=IGHA1 PE=1 SV=2	11916	File384_Scan11295	controllerType=0 controllerNumber=1 scan=11295	34.5613
10156:3	3	K.KGDTFSC[+57.021]M[+15.995]VGHEALPLAFTQK.T		C[+57], M[+16]	785.049	3	2353.13	2353.13	0	0.8	307	Specific	106.87	106.87	106.87	1.83	41	>sp|P01876|IGHA1_HUMAN Immunoglobulin heavy constant alpha 1 OS=Homo sapiens GN=IGHA1 PE=1 SV=2	11916	File384_Scan12540	controllerType=0 controllerNumber=1 scan=12540	37.2011
13977:3	3	K.KGDTFSC[+57.021]M[+15.995]VGHEALPLAFTQK.T		C[+57], M[+16]	785.049	3	2353.13	2353.13	0	1	307	Specific	112.29	112.29	112.29	3.5	41	>sp|P01876|IGHA1_HUMAN Immunoglobulin heavy constant alpha 1 OS=Homo sapiens GN=IGHA1 PE=1 SV=2	11916	File384_Scan17222	controllerType=0 controllerNumber=1 scan=17222	49.604
09930:3	3	K.KGDTFSC[+57.021]M[+15.995]VGHEALPLAFTQK.T		C[+57], M[+16]	785.05	3	2353.13	2353.13	0	1.1	307	Specific	118.15	118.15	118.15	3.05	41	>sp|P01876|IGHA1_HUMAN Immunoglobulin heavy constant alpha 1 OS=Homo sapiens GN=IGHA1 PE=1 SV=2	11916	File384_Scan12301	controllerType=0 controllerNumber=1 scan=12301	36.6965
10438:4	3	K.KGDTFSC[+57.021]M[+15.995]VGHEALPLAFTQK.T		C[+57], M[+16]	589.038	4	2353.13	2353.13	0	0.3	307	Specific	128.01	128.01	128.01	4.6	41	>sp|P01876|IGHA1_HUMAN Immunoglobulin heavy constant alpha 1 OS=Homo sapiens GN=IGHA1 PE=1 SV=2	11916	File384_Scan12840	controllerType=0 controllerNumber=1 scan=12840	37.8081
10655:3	3	K.KGDTFSC[+57.021]M[+15.995]VGHEALPLAFTQK.T		C[+57], M[+16]	785.049	3	2353.13	2353.13	0	-0.1	307	Specific	133.7	69.41	69.41	1.45	41	>sp|P01876|IGHA1_HUMAN Immunoglobulin heavy constant alpha 1 OS=Homo sapiens GN=IGHA1 PE=1 SV=2	11916	File384_Scan13068	controllerType=0 controllerNumber=1 scan=13068	38.2639
11609:4	3	K.KGDTFSC[+57.021]M[+15.995]VGHEALPLAFTQK.T		C[+57], M[+16]	589.038	4	2353.13	2353.13	0	0.2	307	Specific	137.95	137.95	137.95	4.81	41	>sp|P01876|IGHA1_HUMAN Immunoglobulin heavy constant alpha 1 OS=Homo sapiens GN=IGHA1 PE=1 SV=2	11916	File384_Scan14097	controllerType=0 controllerNumber=1 scan=14097	40.5266
08837:3	3	K.KGDTFSC[+57.021]M[+15.995]VGHEALPLAFTQK.T		C[+57], M[+16]	785.049	3	2353.13	2353.13	0	0.1	307	Specific	139.98	139.98	139.98	2.3	41	>sp|P01876|IGHA1_HUMAN Immunoglobulin heavy constant alpha 1 OS=Homo sapiens GN=IGHA1 PE=1 SV=2	11916	File384_Scan11148	controllerType=0 controllerNumber=1 scan=11148	34.2533
13981:4	3	K.KGDTFSC[+57.021]M[+15.995]VGHEALPLAFTQK.T		C[+57], M[+16]	589.039	4	2353.13	2353.13	0	0.7	307	Specific	148.77	148.77	148.77	5.05	41	>sp|P01876|IGHA1_HUMAN Immunoglobulin heavy constant alpha 1 OS=Homo sapiens GN=IGHA1 PE=1 SV=2	11916	File384_Scan17230	controllerType=0 controllerNumber=1 scan=17230	49.6391
13537:4	3	K.KGDTFSC[+57.021]M[+15.995]VGHEALPLAFTQK.T		C[+57], M[+16]	589.039	4	2353.14	2353.13	0	1.9	307	Specific	159.8	159.8	159.8	3.7	41	>sp|P01876|IGHA1_HUMAN Immunoglobulin heavy constant alpha 1 OS=Homo sapiens GN=IGHA1 PE=1 SV=2	11916	File384_Scan16691	controllerType=0 controllerNumber=1 scan=16691	48.2594
07700:3	3	K.KGDTFSC[+57.021]M[+15.995]VGHEALPLAFTQK.T		C[+57], M[+16]	785.048	3	2353.13	2353.13	0	-0.8	307	Specific	168.25	168.25	168.25	3.16	41	>sp|P01876|IGHA1_HUMAN Immunoglobulin heavy constant alpha 1 OS=Homo sapiens GN=IGHA1 PE=1 SV=2	11916	File384_Scan9945	controllerType=0 controllerNumber=1 scan=9945	31.8273
11655:4	3	K.KGDTFSC[+57.021]M[+15.995]VGHEALPLAFTQK.T		C[+57], M[+16]	589.038	4	2353.13	2353.13	0	0	307	Specific	169.55	169.55	169.55	4.87	41	>sp|P01876|IGHA1_HUMAN Immunoglobulin heavy constant alpha 1 OS=Homo sapiens GN=IGHA1 PE=1 SV=2	11916	File384_Scan14159	controllerType=0 controllerNumber=1 scan=14159	40.6947
08152:3	3	K.KGDTFSC[+57.021]M[+15.995]VGHEALPLAFTQK.T		C[+57], M[+16]	785.049	3	2353.13	2353.13	0	0.7	307	Specific	171.59	171.59	171.59	3.43	41	>sp|P01876|IGHA1_HUMAN Immunoglobulin heavy constant alpha 1 OS=Homo sapiens GN=IGHA1 PE=1 SV=2	11916	File384_Scan10419	controllerType=0 controllerNumber=1 scan=10419	32.8
13919:3	3	K.KGDTFSC[+57.021]M[+15.995]VGHEALPLAFTQK.T		C[+57], M[+16]	785.05	3	2353.13	2353.13	0	1.1	307	Specific	177.5	177.5	177.5	4.79	41	>sp|P01876|IGHA1_HUMAN Immunoglobulin heavy constant alpha 1 OS=Homo sapiens GN=IGHA1 PE=1 SV=2	11916	File384_Scan17129	controllerType=0 controllerNumber=1 scan=17129	49.2582
13958:4	3	K.KGDTFSC[+57.021]M[+15.995]VGHEALPLAFTQK.T		C[+57], M[+16]	589.038	4	2353.13	2353.13	0	0.2	307	Specific	190.97	190.97	190.97	5.36	41	>sp|P01876|IGHA1_HUMAN Immunoglobulin heavy constant alpha 1 OS=Homo sapiens GN=IGHA1 PE=1 SV=2	11916	File384_Scan17188	controllerType=0 controllerNumber=1 scan=17188	49.4624
09164:3	3	K.KGDTFSC[+57.021]M[+15.995]VGHEALPLAFTQK.T		C[+57], M[+16]	785.05	3	2353.14	2353.13	0	2	307	Specific	191.15	191.15	191.15	3.6	41	>sp|P01876|IGHA1_HUMAN Immunoglobulin heavy constant alpha 1 OS=Homo sapiens GN=IGHA1 PE=1 SV=2	11916	File384_Scan11491	controllerType=0 controllerNumber=1 scan=11491	34.9795
10597:4	3	K.KGDTFSC[+57.021]M[+15.995]VGHEALPLAFTQK.T		C[+57], M[+16]	589.039	4	2353.13	2353.13	0	1.1	307	Specific	196.79	196.79	196.79	5.06	41	>sp|P01876|IGHA1_HUMAN Immunoglobulin heavy constant alpha 1 OS=Homo sapiens GN=IGHA1 PE=1 SV=2	11916	File384_Scan13007	controllerType=0 controllerNumber=1 scan=13007	38.1426
08856:3	3	K.KGDTFSC[+57.021]M[+15.995]VGHEALPLAFTQK.T		C[+57], M[+16]	785.05	3	2353.13	2353.13	0	1.1	307	Specific	199.28	195.21	195.21	3.6	41	>sp|P01876|IGHA1_HUMAN Immunoglobulin heavy constant alpha 1 OS=Homo sapiens GN=IGHA1 PE=1 SV=2	11916	File384_Scan11168	controllerType=0 controllerNumber=1 scan=11168	34.2924
08721:3	3	K.KGDTFSC[+57.021]M[+15.995]VGHEALPLAFTQK.T		C[+57], M[+16]	785.05	3	2353.13	2353.13	0	1.4	307	Specific	210.52	210.52	210.52	3.05	41	>sp|P01876|IGHA1_HUMAN Immunoglobulin heavy constant alpha 1 OS=Homo sapiens GN=IGHA1 PE=1 SV=2	11916	File384_Scan11023	controllerType=0 controllerNumber=1 scan=11023	33.9987
08880:4	3	K.KGDTFSC[+57.021]M[+15.995]VGHEALPLAFTQK.T		C[+57], M[+16]	589.039	4	2353.13	2353.13	0	0.9	307	Specific	211.89	211.89	211.89	4.86	41	>sp|P01876|IGHA1_HUMAN Immunoglobulin heavy constant alpha 1 OS=Homo sapiens GN=IGHA1 PE=1 SV=2	11916	File384_Scan11193	controllerType=0 controllerNumber=1 scan=11193	34.3437
13874:4	3	K.KGDTFSC[+57.021]M[+15.995]VGHEALPLAFTQK.T		C[+57], M[+16]	589.039	4	2353.13	2353.13	0	0.5	307	Specific	217.95	217.95	217.95	5.71	41	>sp|P01876|IGHA1_HUMAN Immunoglobulin heavy constant alpha 1 OS=Homo sapiens GN=IGHA1 PE=1 SV=2	11916	File384_Scan17073	controllerType=0 controllerNumber=1 scan=17073	49.1045
11368:4	3	K.KGDTFSC[+57.021]M[+15.995]VGHEALPLAFTQK.T		C[+57], M[+16]	589.038	4	2353.13	2353.13	0	-0.1	307	Specific	218.12	218.12	218.12	5.28	41	>sp|P01876|IGHA1_HUMAN Immunoglobulin heavy constant alpha 1 OS=Homo sapiens GN=IGHA1 PE=1 SV=2	11916	File384_Scan13817	controllerType=0 controllerNumber=1 scan=13817	39.8091
07284:3	3	K.KGDTFSC[+57.021]M[+15.995]VGHEALPLAFTQK.T		C[+57], M[+16]	785.049	3	2353.13	2353.13	0	0.9	307	Specific	224.96	191.31	191.31	3.86	41	>sp|P01876|IGHA1_HUMAN Immunoglobulin heavy constant alpha 1 OS=Homo sapiens GN=IGHA1 PE=1 SV=2	11916	File384_Scan9507	controllerType=0 controllerNumber=1 scan=9507	30.9369
13864:3	3	K.KGDTFSC[+57.021]M[+15.995]VGHEALPLAFTQK.T		C[+57], M[+16]	785.05	3	2353.13	2353.13	0	1.1	307	Specific	227.35	227.35	227.35	6.18	41	>sp|P01876|IGHA1_HUMAN Immunoglobulin heavy constant alpha 1 OS=Homo sapiens GN=IGHA1 PE=1 SV=2	11916	File384_Scan17060	controllerType=0 controllerNumber=1 scan=17060	49.0706
09681:4	3	K.KGDTFSC[+57.021]M[+15.995]VGHEALPLAFTQK.T		C[+57], M[+16]	589.039	4	2353.13	2353.13	0	0.4	307	Specific	232.68	232.68	232.68	7.49	41	>sp|P01876|IGHA1_HUMAN Immunoglobulin heavy constant alpha 1 OS=Homo sapiens GN=IGHA1 PE=1 SV=2	11916	File384_Scan12034	controllerType=0 controllerNumber=1 scan=12034	36.1323
09423:4	3	K.KGDTFSC[+57.021]M[+15.995]VGHEALPLAFTQK.T		C[+57], M[+16]	589.039	4	2353.14	2353.13	0	2	307	Specific	239.42	239.42	239.42	6.59	41	>sp|P01876|IGHA1_HUMAN Immunoglobulin heavy constant alpha 1 OS=Homo sapiens GN=IGHA1 PE=1 SV=2	11916	File384_Scan11762	controllerType=0 controllerNumber=1 scan=11762	35.5562
09800:4	3	K.KGDTFSC[+57.021]M[+15.995]VGHEALPLAFTQK.T		C[+57], M[+16]	589.039	4	2353.13	2353.13	0	0.9	307	Specific	248.84	248.84	248.84	6.77	41	>sp|P01876|IGHA1_HUMAN Immunoglobulin heavy constant alpha 1 OS=Homo sapiens GN=IGHA1 PE=1 SV=2	11916	File384_Scan12163	controllerType=0 controllerNumber=1 scan=12163	36.4058
09912:4	3	K.KGDTFSC[+57.021]M[+15.995]VGHEALPLAFTQK.T		C[+57], M[+16]	589.039	4	2353.14	2353.13	0	1.5	307	Specific	249.14	249.14	249.14	7.81	41	>sp|P01876|IGHA1_HUMAN Immunoglobulin heavy constant alpha 1 OS=Homo sapiens GN=IGHA1 PE=1 SV=2	11916	File384_Scan12282	controllerType=0 controllerNumber=1 scan=12282	36.658
10032:4	3	K.KGDTFSC[+57.021]M[+15.995]VGHEALPLAFTQK.T		C[+57], M[+16]	589.039	4	2353.13	2353.13	0	1.1	307	Specific	249.87	249.87	249.87	7	41	>sp|P01876|IGHA1_HUMAN Immunoglobulin heavy constant alpha 1 OS=Homo sapiens GN=IGHA1 PE=1 SV=2	11916	File384_Scan12408	controllerType=0 controllerNumber=1 scan=12408	36.9277
09019:4	3	K.KGDTFSC[+57.021]M[+15.995]VGHEALPLAFTQK.T		C[+57], M[+16]	589.039	4	2353.13	2353.13	0	0.6	307	Specific	253.18	253.18	253.18	6.5	41	>sp|P01876|IGHA1_HUMAN Immunoglobulin heavy constant alpha 1 OS=Homo sapiens GN=IGHA1 PE=1 SV=2	11916	File384_Scan11339	controllerType=0 controllerNumber=1 scan=11339	34.6526
09295:4	3	K.KGDTFSC[+57.021]M[+15.995]VGHEALPLAFTQK.T		C[+57], M[+16]	589.039	4	2353.13	2353.13	0	0.4	307	Specific	255.61	255.61	255.61	6.61	41	>sp|P01876|IGHA1_HUMAN Immunoglobulin heavy constant alpha 1 OS=Homo sapiens GN=IGHA1 PE=1 SV=2	11916	File384_Scan11628	controllerType=0 controllerNumber=1 scan=11628	35.2768
08010:3	3	K.KGDTFSC[+57.021]M[+15.995]VGHEALPLAFTQK.T		C[+57], M[+16]	785.049	3	2353.13	2353.13	0	0.7	307	Specific	260.42	256.09	256.09	6.11	41	>sp|P01876|IGHA1_HUMAN Immunoglobulin heavy constant alpha 1 OS=Homo sapiens GN=IGHA1 PE=1 SV=2	11916	File384_Scan10270	controllerType=0 controllerNumber=1 scan=10270	32.4933
08457:4	3	K.KGDTFSC[+57.021]M[+15.995]VGHEALPLAFTQK.T		C[+57], M[+16]	589.038	4	2353.13	2353.13	0	-0.5	307	Specific	264.54	260.82	260.82	6.52	41	>sp|P01876|IGHA1_HUMAN Immunoglobulin heavy constant alpha 1 OS=Homo sapiens GN=IGHA1 PE=1 SV=2	11916	File384_Scan10739	controllerType=0 controllerNumber=1 scan=10739	33.4348
09167:4	3	K.KGDTFSC[+57.021]M[+15.995]VGHEALPLAFTQK.T		C[+57], M[+16]	589.039	4	2353.13	2353.13	0	0.4	307	Specific	266.57	266.57	266.57	6.96	41	>sp|P01876|IGHA1_HUMAN Immunoglobulin heavy constant alpha 1 OS=Homo sapiens GN=IGHA1 PE=1 SV=2	11916	File384_Scan11494	controllerType=0 controllerNumber=1 scan=11494	34.9855
13924:4	3	K.KGDTFSC[+57.021]M[+15.995]VGHEALPLAFTQK.T		C[+57], M[+16]	589.039	4	2353.13	2353.13	0	0.7	307	Specific	266.6	266.6	266.6	8.01	41	>sp|P01876|IGHA1_HUMAN Immunoglobulin heavy constant alpha 1 OS=Homo sapiens GN=IGHA1 PE=1 SV=2	11916	File384_Scan17136	controllerType=0 controllerNumber=1 scan=17136	49.2772
13645:4	3	K.KGDTFSC[+57.021]M[+15.995]VGHEALPLAFTQK.T		C[+57], M[+16]	589.039	4	2353.13	2353.13	0	0.5	307	Specific	268.43	268.43	268.43	6.96	41	>sp|P01876|IGHA1_HUMAN Immunoglobulin heavy constant alpha 1 OS=Homo sapiens GN=IGHA1 PE=1 SV=2	11916	File384_Scan16810	controllerType=0 controllerNumber=1 scan=16810	48.5117
09534:4	3	K.KGDTFSC[+57.021]M[+15.995]VGHEALPLAFTQK.T		C[+57], M[+16]	589.039	4	2353.13	2353.13	0	0.6	307	Specific	289.76	247.89	247.89	7.02	41	>sp|P01876|IGHA1_HUMAN Immunoglobulin heavy constant alpha 1 OS=Homo sapiens GN=IGHA1 PE=1 SV=2	11916	File384_Scan11879	controllerType=0 controllerNumber=1 scan=11879	35.8177
13733:4	3	K.KGDTFSC[+57.021]M[+15.995]VGHEALPLAFTQK.T		C[+57], M[+16]	589.039	4	2353.13	2353.13	0	0.8	307	Specific	295.72	295.72	295.72	7.31	41	>sp|P01876|IGHA1_HUMAN Immunoglobulin heavy constant alpha 1 OS=Homo sapiens GN=IGHA1 PE=1 SV=2	11916	File384_Scan16909	controllerType=0 controllerNumber=1 scan=16909	48.7204
08436:3	3	K.KGDTFSC[+57.021]M[+15.995]VGHEALPLAFTQK.T		C[+57], M[+16]	785.05	3	2353.13	2353.13	0	1.1	307	Specific	296.35	286.59	286.59	6.54	41	>sp|P01876|IGHA1_HUMAN Immunoglobulin heavy constant alpha 1 OS=Homo sapiens GN=IGHA1 PE=1 SV=2	11916	File384_Scan10717	controllerType=0 controllerNumber=1 scan=10717	33.3902
08723:4	3	K.KGDTFSC[+57.021]M[+15.995]VGHEALPLAFTQK.T		C[+57], M[+16]	589.039	4	2353.14	2353.13	0	1.5	307	Specific	308.81	293.54	293.54	7.52	41	>sp|P01876|IGHA1_HUMAN Immunoglobulin heavy constant alpha 1 OS=Homo sapiens GN=IGHA1 PE=1 SV=2	11916	File384_Scan11025	controllerType=0 controllerNumber=1 scan=11025	34.0031
07332:4	3	K.KGDTFSC[+57.021]M[+15.995]VGHEALPLAFTQK.T		C[+57], M[+16]	589.039	4	2353.13	2353.13	0	0.7	307	Specific	313.69	313.69	313.69	6.97	41	>sp|P01876|IGHA1_HUMAN Immunoglobulin heavy constant alpha 1 OS=Homo sapiens GN=IGHA1 PE=1 SV=2	11916	File384_Scan9557	controllerType=0 controllerNumber=1 scan=9557	31.039
13625:3	3	K.KGDTFSC[+57.021]M[+15.995]VGHEALPLAFTQK.T		C[+57], M[+16]	785.049	3	2353.13	2353.13	0	0.8	307	Specific	321.89	321.89	321.89	7.92	41	>sp|P01876|IGHA1_HUMAN Immunoglobulin heavy constant alpha 1 OS=Homo sapiens GN=IGHA1 PE=1 SV=2	11916	File384_Scan16789	controllerType=0 controllerNumber=1 scan=16789	48.4698
07459:3	3	K.KGDTFSC[+57.021]M[+15.995]VGHEALPLAFTQK.T		C[+57], M[+16]	785.049	3	2353.13	2353.13	0	0.5	307	Specific	321.94	321.94	321.94	7.11	41	>sp|P01876|IGHA1_HUMAN Immunoglobulin heavy constant alpha 1 OS=Homo sapiens GN=IGHA1 PE=1 SV=2	11916	File384_Scan9692	controllerType=0 controllerNumber=1 scan=9692	31.3099
08128:4	3	K.KGDTFSC[+57.021]M[+15.995]VGHEALPLAFTQK.T		C[+57], M[+16]	589.039	4	2353.13	2353.13	0	1	307	Specific	328.94	328.94	328.94	7.94	41	>sp|P01876|IGHA1_HUMAN Immunoglobulin heavy constant alpha 1 OS=Homo sapiens GN=IGHA1 PE=1 SV=2	11916	File384_Scan10394	controllerType=0 controllerNumber=1 scan=10394	32.749
08018:4	3	K.KGDTFSC[+57.021]M[+15.995]VGHEALPLAFTQK.T		C[+57], M[+16]	589.039	4	2353.13	2353.13	0	1.3	307	Specific	333.4	333.4	333.4	7.81	41	>sp|P01876|IGHA1_HUMAN Immunoglobulin heavy constant alpha 1 OS=Homo sapiens GN=IGHA1 PE=1 SV=2	11916	File384_Scan10279	controllerType=0 controllerNumber=1 scan=10279	32.5146
13796:3	3	K.KGDTFSC[+57.021]M[+15.995]VGHEALPLAFTQK.T		C[+57], M[+16]	785.049	3	2353.13	2353.13	0	1	307	Specific	341.12	341.12	341.12	8.09	41	>sp|P01876|IGHA1_HUMAN Immunoglobulin heavy constant alpha 1 OS=Homo sapiens GN=IGHA1 PE=1 SV=2	11916	File384_Scan16983	controllerType=0 controllerNumber=1 scan=16983	48.8897
10155:4	3	K.KGDTFSC[+57.021]M[+15.995]VGHEALPLAFTQK.T		C[+57], M[+16]	589.039	4	2353.13	2353.13	0	0.5	307	Specific	345.31	345.31	345.31	8.65	41	>sp|P01876|IGHA1_HUMAN Immunoglobulin heavy constant alpha 1 OS=Homo sapiens GN=IGHA1 PE=1 SV=2	11916	File384_Scan12538	controllerType=0 controllerNumber=1 scan=12538	37.1955
13811:4	3	K.KGDTFSC[+57.021]M[+15.995]VGHEALPLAFTQK.T		C[+57], M[+16]	589.039	4	2353.13	2353.13	0	0.9	307	Specific	355.91	355.91	355.91	8.65	41	>sp|P01876|IGHA1_HUMAN Immunoglobulin heavy constant alpha 1 OS=Homo sapiens GN=IGHA1 PE=1 SV=2	11916	File384_Scan16999	controllerType=0 controllerNumber=1 scan=16999	48.9206
07697:4	3	K.KGDTFSC[+57.021]M[+15.995]VGHEALPLAFTQK.T		C[+57], M[+16]	589.039	4	2353.14	2353.13	0	1.8	307	Specific	356.31	340.47	340.47	7.9	41	>sp|P01876|IGHA1_HUMAN Immunoglobulin heavy constant alpha 1 OS=Homo sapiens GN=IGHA1 PE=1 SV=2	11916	File384_Scan9942	controllerType=0 controllerNumber=1 scan=9942	31.8226
07577:4	3	K.KGDTFSC[+57.021]M[+15.995]VGHEALPLAFTQK.T		C[+57], M[+16]	589.038	4	2353.13	2353.13	0	-0.2	307	Specific	363.11	339.64	339.64	7.81	41	>sp|P01876|IGHA1_HUMAN Immunoglobulin heavy constant alpha 1 OS=Homo sapiens GN=IGHA1 PE=1 SV=2	11916	File384_Scan9816	controllerType=0 controllerNumber=1 scan=9816	31.5724
07862:3	3	K.KGDTFSC[+57.021]M[+15.995]VGHEALPLAFTQK.T		C[+57], M[+16]	785.049	3	2353.13	2353.13	0	0.7	307	Specific	374.34	374.34	374.34	7.83	41	>sp|P01876|IGHA1_HUMAN Immunoglobulin heavy constant alpha 1 OS=Homo sapiens GN=IGHA1 PE=1 SV=2	11916	File384_Scan10115	controllerType=0 controllerNumber=1 scan=10115	32.1765
13719:3	3	K.KGDTFSC[+57.021]M[+15.995]VGHEALPLAFTQK.T		C[+57], M[+16]	785.049	3	2353.13	2353.13	0	0.7	307	Specific	378.06	369.59	369.59	8.52	41	>sp|P01876|IGHA1_HUMAN Immunoglobulin heavy constant alpha 1 OS=Homo sapiens GN=IGHA1 PE=1 SV=2	11916	File384_Scan16894	controllerType=0 controllerNumber=1 scan=16894	48.6891
07845:4	3	K.KGDTFSC[+57.021]M[+15.995]VGHEALPLAFTQK.T		C[+57], M[+16]	589.038	4	2353.13	2353.13	0	0.2	307	Specific	389.96	377.36	377.36	8.15	41	>sp|P01876|IGHA1_HUMAN Immunoglobulin heavy constant alpha 1 OS=Homo sapiens GN=IGHA1 PE=1 SV=2	11916	File384_Scan10097	controllerType=0 controllerNumber=1 scan=10097	32.1379
07461:4	3	K.KGDTFSC[+57.021]M[+15.995]VGHEALPLAFTQK.T		C[+57], M[+16]	589.039	4	2353.13	2353.13	0	0.4	307	Specific	396.65	377.23	377.23	9.04	41	>sp|P01876|IGHA1_HUMAN Immunoglobulin heavy constant alpha 1 OS=Homo sapiens GN=IGHA1 PE=1 SV=2	11916	File384_Scan9694	controllerType=0 controllerNumber=1 scan=9694	31.3137
06658:4	3	K.KGDTFSC[+57.021]M[+15.995]VGHEALPLAFTQK.T		C[+57], M[+16]	589.038	4	2353.13	2353.13	0	0.1	307	Specific	436.06	436.06	436.06	9.45	41	>sp|P01876|IGHA1_HUMAN Immunoglobulin heavy constant alpha 1 OS=Homo sapiens GN=IGHA1 PE=1 SV=2	11916	File384_Scan8851	controllerType=0 controllerNumber=1 scan=8851	29.5815
07580:3	3	K.KGDTFSC[+57.021]M[+15.995]VGHEALPLAFTQK.T		C[+57], M[+16]	785.049	3	2353.13	2353.13	0	0	307	Specific	452.55	445.85	445.85	9.68	41	>sp|P01876|IGHA1_HUMAN Immunoglobulin heavy constant alpha 1 OS=Homo sapiens GN=IGHA1 PE=1 SV=2	11916	File384_Scan9819	controllerType=0 controllerNumber=1 scan=9819	31.577
07212:4	3	K.KGDTFSC[+57.021]M[+15.995]VGHEALPLAFTQK.T		C[+57], M[+16]	589.039	4	2353.13	2353.13	0	0.5	307	Specific	465.06	445.54	445.54	10.56	41	>sp|P01876|IGHA1_HUMAN Immunoglobulin heavy constant alpha 1 OS=Homo sapiens GN=IGHA1 PE=1 SV=2	11916	File384_Scan9431	controllerType=0 controllerNumber=1 scan=9431	30.7837
07101:4	3	K.KGDTFSC[+57.021]M[+15.995]VGHEALPLAFTQK.T		C[+57], M[+16]	589.039	4	2353.13	2353.13	0	0.7	307	Specific	476.89	453.42	453.42	10.56	41	>sp|P01876|IGHA1_HUMAN Immunoglobulin heavy constant alpha 1 OS=Homo sapiens GN=IGHA1 PE=1 SV=2	11916	File384_Scan9315	controllerType=0 controllerNumber=1 scan=9315	30.5387
07033:3	3	K.KGDTFSC[+57.021]M[+15.995]VGHEALPLAFTQK.T		C[+57], M[+16]	785.049	3	2353.13	2353.13	0	0.4	307	Specific	498.27	431.16	431.16	10.04	41	>sp|P01876|IGHA1_HUMAN Immunoglobulin heavy constant alpha 1 OS=Homo sapiens GN=IGHA1 PE=1 SV=2	11916	File384_Scan9244	controllerType=0 controllerNumber=1 scan=9244	30.3862
06765:4	3	K.KGDTFSC[+57.021]M[+15.995]VGHEALPLAFTQK.T		C[+57], M[+16]	589.039	4	2353.13	2353.13	0	1	307	Specific	501.68	468.33	468.33	10.91	41	>sp|P01876|IGHA1_HUMAN Immunoglobulin heavy constant alpha 1 OS=Homo sapiens GN=IGHA1 PE=1 SV=2	11916	File384_Scan8963	controllerType=0 controllerNumber=1 scan=8963	29.8087
06906:3	3	K.KGDTFSC[+57.021]M[+15.995]VGHEALPLAFTQK.T		C[+57], M[+16]	785.049	3	2353.13	2353.13	0	0.7	307	Specific	530.16	451.03	451.03	10.27	41	>sp|P01876|IGHA1_HUMAN Immunoglobulin heavy constant alpha 1 OS=Homo sapiens GN=IGHA1 PE=1 SV=2	11916	File384_Scan9111	controllerType=0 controllerNumber=1 scan=9111	30.107
06557:4	3	K.KGDTFSC[+57.021]M[+15.995]VGHEALPLAFTQK.T		C[+57], M[+16]	589.039	4	2353.13	2353.13	0	1	307	Specific	536.5	536.5	536.5	10.98	41	>sp|P01876|IGHA1_HUMAN Immunoglobulin heavy constant alpha 1 OS=Homo sapiens GN=IGHA1 PE=1 SV=2	11916	File384_Scan8745	controllerType=0 controllerNumber=1 scan=8745	29.3713
06886:4	3	K.KGDTFSC[+57.021]M[+15.995]VGHEALPLAFTQK.T		C[+57], M[+16]	589.039	4	2353.13	2353.13	0	0.7	307	Specific	545.04	506.28	506.28	10.99	41	>sp|P01876|IGHA1_HUMAN Immunoglobulin heavy constant alpha 1 OS=Homo sapiens GN=IGHA1 PE=1 SV=2	11916	File384_Scan9090	controllerType=0 controllerNumber=1 scan=9090	30.0644
06988:4	3	K.KGDTFSC[+57.021]M[+15.995]VGHEALPLAFTQK.T		C[+57], M[+16]	589.038	4	2353.13	2353.13	0	0.3	307	Specific	556.81	526.08	526.08	10.99	41	>sp|P01876|IGHA1_HUMAN Immunoglobulin heavy constant alpha 1 OS=Homo sapiens GN=IGHA1 PE=1 SV=2	11916	File384_Scan9197	controllerType=0 controllerNumber=1 scan=9197	30.2822
06453:4	3	K.KGDTFSC[+57.021]M[+15.995]VGHEALPLAFTQK.T		C[+57], M[+16]	589.039	4	2353.13	2353.13	0	1.1	307	Specific	611.97	579.96	579.96	13.41	41	>sp|P01876|IGHA1_HUMAN Immunoglobulin heavy constant alpha 1 OS=Homo sapiens GN=IGHA1 PE=1 SV=2	11916	File384_Scan8636	controllerType=0 controllerNumber=1 scan=8636	29.1375
06032:4	3	K.KGDTFSC[+57.021]M[+15.995]VGHEALPLAFTQK.T		C[+57], M[+16]	589.038	4	2353.13	2353.13	0	-1.3	307	Specific	621.23	576.96	576.96	12.81	41	>sp|P01876|IGHA1_HUMAN Immunoglobulin heavy constant alpha 1 OS=Homo sapiens GN=IGHA1 PE=1 SV=2	11916	File384_Scan8195	controllerType=0 controllerNumber=1 scan=8195	28.1862
06128:4	3	K.KGDTFSC[+57.021]M[+15.995]VGHEALPLAFTQK.T		C[+57], M[+16]	589.04	4	2353.14	2353.13	0	2.5	307	Specific	621.57	621.57	621.57	12.9	41	>sp|P01876|IGHA1_HUMAN Immunoglobulin heavy constant alpha 1 OS=Homo sapiens GN=IGHA1 PE=1 SV=2	11916	File384_Scan8296	controllerType=0 controllerNumber=1 scan=8296	28.4083
06079:2	3	K.KGDTFSC[+57.021]M[+15.995]VGHEALPLAFTQK.T		C[+57], M[+16]	1177.07	2	2353.13	2353.13	0	0.5	307	Specific	633.06	555.13	555.13	11.41	41	>sp|P01876|IGHA1_HUMAN Immunoglobulin heavy constant alpha 1 OS=Homo sapiens GN=IGHA1 PE=1 SV=2	11916	File384_Scan8244	controllerType=0 controllerNumber=1 scan=8244	28.2965
06235:4	3	K.KGDTFSC[+57.021]M[+15.995]VGHEALPLAFTQK.T		C[+57], M[+16]	589.04	4	2353.14	2353.13	0	2.1	307	Specific	636.82	596.89	596.89	12.9	41	>sp|P01876|IGHA1_HUMAN Immunoglobulin heavy constant alpha 1 OS=Homo sapiens GN=IGHA1 PE=1 SV=2	11916	File384_Scan8408	controllerType=0 controllerNumber=1 scan=8408	28.6465
06345:4	3	K.KGDTFSC[+57.021]M[+15.995]VGHEALPLAFTQK.T		C[+57], M[+16]	589.039	4	2353.13	2353.13	0	1.3	307	Specific	652.51	625.7	625.7	14.41	41	>sp|P01876|IGHA1_HUMAN Immunoglobulin heavy constant alpha 1 OS=Homo sapiens GN=IGHA1 PE=1 SV=2	11916	File384_Scan8523	controllerType=0 controllerNumber=1 scan=8523	28.8993
06769:3	3	K.KGDTFSC[+57.021]M[+15.995]VGHEALPLAFTQK.T		C[+57], M[+16]	785.05	3	2353.14	2353.13	0	1.6	307	Specific	685.57	602.14	602.14	13.85	41	>sp|P01876|IGHA1_HUMAN Immunoglobulin heavy constant alpha 1 OS=Homo sapiens GN=IGHA1 PE=1 SV=2	11916	File384_Scan8967	controllerType=0 controllerNumber=1 scan=8967	29.8149
06659:3	3	K.KGDTFSC[+57.021]M[+15.995]VGHEALPLAFTQK.T		C[+57], M[+16]	785.048	3	2353.13	2353.13	0	-1.1	307	Specific	695.66	629.64	629.64	13.25	41	>sp|P01876|IGHA1_HUMAN Immunoglobulin heavy constant alpha 1 OS=Homo sapiens GN=IGHA1 PE=1 SV=2	11916	File384_Scan8852	controllerType=0 controllerNumber=1 scan=8852	29.5833
06035:3	3	K.KGDTFSC[+57.021]M[+15.995]VGHEALPLAFTQK.T		C[+57], M[+16]	785.048	3	2353.13	2353.13	0	-1.5	307	Specific	728.6	679.97	679.97	14.25	41	>sp|P01876|IGHA1_HUMAN Immunoglobulin heavy constant alpha 1 OS=Homo sapiens GN=IGHA1 PE=1 SV=2	11916	File384_Scan8198	controllerType=0 controllerNumber=1 scan=8198	28.1916
06081:2	3	K.KGDTFSC[+57.021]M[+15.995]VGHEALPLAFTQK.T		C[+57], M[+16]	1177.07	2	2353.13	2353.13	0	0.5	307	Specific	764.51	560.32	560.32	13.25	41	>sp|P01876|IGHA1_HUMAN Immunoglobulin heavy constant alpha 1 OS=Homo sapiens GN=IGHA1 PE=1 SV=2	11916	File384_Scan8246	controllerType=0 controllerNumber=1 scan=8246	28.3011
06558:3	3	K.KGDTFSC[+57.021]M[+15.995]VGHEALPLAFTQK.T		C[+57], M[+16]	785.05	3	2353.13	2353.13	0	1.2	307	Specific	776.62	653.93	653.93	15.85	41	>sp|P01876|IGHA1_HUMAN Immunoglobulin heavy constant alpha 1 OS=Homo sapiens GN=IGHA1 PE=1 SV=2	11916	File384_Scan8746	controllerType=0 controllerNumber=1 scan=8746	29.3737
06454:3	3	K.KGDTFSC[+57.021]M[+15.995]VGHEALPLAFTQK.T		C[+57], M[+16]	785.049	3	2353.13	2353.13	0	1	307	Specific	834.69	722.55	722.55	16.71	41	>sp|P01876|IGHA1_HUMAN Immunoglobulin heavy constant alpha 1 OS=Homo sapiens GN=IGHA1 PE=1 SV=2	11916	File384_Scan8637	controllerType=0 controllerNumber=1 scan=8637	29.139
06346:3	3	K.KGDTFSC[+57.021]M[+15.995]VGHEALPLAFTQK.T		C[+57], M[+16]	785.049	3	2353.13	2353.13	0	0.3	307	Specific	887.91	779.74	779.74	17.71	41	>sp|P01876|IGHA1_HUMAN Immunoglobulin heavy constant alpha 1 OS=Homo sapiens GN=IGHA1 PE=1 SV=2	11916	File384_Scan8524	controllerType=0 controllerNumber=1 scan=8524	28.9009
06236:3	3	K.KGDTFSC[+57.021]M[+15.995]VGHEALPLAFTQK.T		C[+57], M[+16]	785.05	3	2353.13	2353.13	0	1.3	307	Specific	947.35	810.14	810.14	18.85	41	>sp|P01876|IGHA1_HUMAN Immunoglobulin heavy constant alpha 1 OS=Homo sapiens GN=IGHA1 PE=1 SV=2	11916	File384_Scan8409	controllerType=0 controllerNumber=1 scan=8409	28.6509
06129:3	3	K.KGDTFSC[+57.021]M[+15.995]VGHEALPLAFTQK.T		C[+57], M[+16]	785.051	3	2353.14	2353.13	0	2.4	307	Specific	962.45	854.7	854.7	19.34	41	>sp|P01876|IGHA1_HUMAN Immunoglobulin heavy constant alpha 1 OS=Homo sapiens GN=IGHA1 PE=1 SV=2	11916	File384_Scan8297	controllerType=0 controllerNumber=1 scan=8297	28.4127
07663:3	3	K.GDTFSC[+57.021]M[+15.995]VGHEALPLAFTQK.T		C[+57], M[+16]	742.352	3	2225.04	2225.04	0	2.4	308	Specific	200.36	196.95	196.95	3.65	41	>sp|P01876|IGHA1_HUMAN Immunoglobulin heavy constant alpha 1 OS=Homo sapiens GN=IGHA1 PE=1 SV=2	11916	File384_Scan9906	controllerType=0 controllerNumber=1 scan=9906	31.7489
07494:3	3	K.GDTFSC[+57.021]M[+15.995]VGHEALPLAFTQK.T		C[+57], M[+16]	742.351	3	2225.04	2225.04	0	0.8	308	Specific	360.53	304.35	304.35	8.69	41	>sp|P01876|IGHA1_HUMAN Immunoglobulin heavy constant alpha 1 OS=Homo sapiens GN=IGHA1 PE=1 SV=2	11916	File384_Scan9729	controllerType=0 controllerNumber=1 scan=9729	31.3934
07243:2	3	K.GDTFSC[+57.021]M[+15.995]VGHEALPLAFTQK.T		C[+57], M[+16]	1113.02	2	2225.04	2225.04	0	2	308	Specific	518.7	457.93	457.93	10.35	41	>sp|P01876|IGHA1_HUMAN Immunoglobulin heavy constant alpha 1 OS=Homo sapiens GN=IGHA1 PE=1 SV=2	11916	File384_Scan9464	controllerType=0 controllerNumber=1 scan=9464	30.8492
07321:3	3	K.GDTFSC[+57.021]M[+15.995]VGHEALPLAFTQK.T		C[+57], M[+16]	742.351	3	2225.04	2225.04	0	1.1	308	Specific	739.02	660.86	660.86	15.41	41	>sp|P01876|IGHA1_HUMAN Immunoglobulin heavy constant alpha 1 OS=Homo sapiens GN=IGHA1 PE=1 SV=2	11916	File384_Scan9546	controllerType=0 controllerNumber=1 scan=9546	31.0166
07217:3	3	K.GDTFSC[+57.021]M[+15.995]VGHEALPLAFTQK.T		C[+57], M[+16]	742.351	3	2225.04	2225.04	0	1.4	308	Specific	816.22	809.71	809.71	17.41	41	>sp|P01876|IGHA1_HUMAN Immunoglobulin heavy constant alpha 1 OS=Homo sapiens GN=IGHA1 PE=1 SV=2	11916	File384_Scan9436	controllerType=0 controllerNumber=1 scan=9436	30.7921
04443:4	3	R.LAGKPTHVN[+2278.809]VSVVM[+15.995]AEVDGTC[+57.021].Y	HexNAc(5)Hex(6)NeuAc(1)	C[+57], M[+16], N[+2279]	1120.48	4	4478.89	4478.88	0	0.7	332	CRagged	23.34	23.34	23.34	4.1	41	>sp|P01876|IGHA1_HUMAN Immunoglobulin heavy constant alpha 1 OS=Homo sapiens GN=IGHA1 PE=1 SV=2	11916	File384_Scan6506	controllerType=0 controllerNumber=1 scan=6506	24.1057
04325:4	3	R.LAGKPTHVN[+2278.809]VSVVM[+15.995]AEVDGTC[+57.021].Y	HexNAc(5)Hex(6)NeuAc(1)	C[+57], M[+16], N[+2279]	1120.48	4	4478.89	4478.88	0	1.8	332	CRagged	28.92	1.16	1.16	3.28	41	>sp|P01876|IGHA1_HUMAN Immunoglobulin heavy constant alpha 1 OS=Homo sapiens GN=IGHA1 PE=1 SV=2	11916	File384_Scan6369	controllerType=0 controllerNumber=1 scan=6369	23.7564
05205:4	3	R.LAGKPTHVN[+2580.957]VSVVM[+15.995]AEVDGTC[+57.021].Y	HexNAc(8)Hex(5)Fuc(1)	C[+57], M[+16], N[+2581]	1196.25	4	4781.99	4781.03	1	-9.7	332	CRagged	46.97	39.37	39.37	3.52	41	>sp|P01876|IGHA1_HUMAN Immunoglobulin heavy constant alpha 1 OS=Homo sapiens GN=IGHA1 PE=1 SV=2	11916	File384_Scan7317	controllerType=0 controllerNumber=1 scan=7317	26.1064
04905:4	3	R.LAGKPTHVN[+2596.952]VSVVM[+15.995]AEVDGTC[+57.021].Y	HexNAc(8)Hex(6)	C[+57], M[+16], N[+2597]	1200.25	4	4797.98	4797.03	1	-10.1	332	CRagged	69.72	4.17	4.17	1.71	41	>sp|P01876|IGHA1_HUMAN Immunoglobulin heavy constant alpha 1 OS=Homo sapiens GN=IGHA1 PE=1 SV=2	11916	File384_Scan7005	controllerType=0 controllerNumber=1 scan=7005	25.3527
05086:4	3	R.LAGKPTHVN[+2407.852]VSVVM[+15.995]AEVDGTC[+57.021].Y	HexNAc(5)Hex(5)NeuAc(2)	C[+57], M[+16], N[+2408]	1152.48	4	4606.89	4607.93	-1	-6.4	332	CRagged	105.36	45.28	45.28	2.25	41	>sp|P01876|IGHA1_HUMAN Immunoglobulin heavy constant alpha 1 OS=Homo sapiens GN=IGHA1 PE=1 SV=2	11916	File384_Scan7193	controllerType=0 controllerNumber=1 scan=7193	25.801
05124:3	3	R.LAGKPTHVN[+2553.910]VSVVM[+15.995]AEVDGTC[+57.021].Y	HexNAc(5)Hex(5)Fuc(1)NeuAc(2)	C[+57], M[+16], N[+2554]	1585.34	3	4754	4753.98	0	4.3	332	CRagged	143.53	80.54	80.54	3.9	41	>sp|P01876|IGHA1_HUMAN Immunoglobulin heavy constant alpha 1 OS=Homo sapiens GN=IGHA1 PE=1 SV=2	11916	File384_Scan7232	controllerType=0 controllerNumber=1 scan=7232	25.9017
05207:4	3	R.LAGKPTHVN[+2580.957]VSVVM[+15.995]AEVDGTC[+57.021].Y	HexNAc(8)Hex(5)Fuc(1)	C[+57], M[+16], N[+2581]	1196.25	4	4781.99	4781.03	1	-9.7	332	CRagged	191.88	158.66	158.66	4.54	41	>sp|P01876|IGHA1_HUMAN Immunoglobulin heavy constant alpha 1 OS=Homo sapiens GN=IGHA1 PE=1 SV=2	11916	File384_Scan7319	controllerType=0 controllerNumber=1 scan=7319	26.116
05004:3	3	R.LAGKPTHVN[+2553.910]VSVVM[+15.995]AEVDGTC[+57.021].Y	HexNAc(5)Hex(5)Fuc(1)NeuAc(2)	C[+57], M[+16], N[+2554]	1585.33	3	4753.99	4753.98	0	1.2	332	CRagged	206.32	94.64	94.64	5.74	41	>sp|P01876|IGHA1_HUMAN Immunoglobulin heavy constant alpha 1 OS=Homo sapiens GN=IGHA1 PE=1 SV=2	11916	File384_Scan7108	controllerType=0 controllerNumber=1 scan=7108	25.5975
05109:3	3	R.LAGKPTHVN[+2351.851]VSVVM[+15.995]AEVDGTC[+57.021].Y	HexNAc(4)Hex(5)Fuc(3)NeuAc(1)	C[+57], M[+16], N[+2352]	1517.64	3	4550.92	4551.92	-1	-0.8	332	CRagged	256.99	218.8	4.36	7.96	41	>sp|P01876|IGHA1_HUMAN Immunoglobulin heavy constant alpha 1 OS=Homo sapiens GN=IGHA1 PE=1 SV=2	11916	File384_Scan7217	controllerType=0 controllerNumber=1 scan=7217	25.8635
05055:4	3	R.LAGKPTHVN[+2580.957]VSVVM[+15.995]AEVDGTC[+57.021].Y	HexNAc(8)Hex(5)Fuc(1)	C[+57], M[+16], N[+2581]	1196.25	4	4781.99	4781.03	1	-9.2	332	CRagged	273.42	255.91	100.55	7.35	41	>sp|P01876|IGHA1_HUMAN Immunoglobulin heavy constant alpha 1 OS=Homo sapiens GN=IGHA1 PE=1 SV=2	11916	File384_Scan7161	controllerType=0 controllerNumber=1 scan=7161	25.7216
04983:3	3	R.LAGKPTHVN[+2553.910]VSVVM[+15.995]AEVDGTC[+57.021].Y	HexNAc(5)Hex(5)Fuc(1)NeuAc(2)	C[+57], M[+16], N[+2554]	1585.33	3	4753.97	4753.98	0	-2.4	332	CRagged	283.03	177.09	138.92	7.52	41	>sp|P01876|IGHA1_HUMAN Immunoglobulin heavy constant alpha 1 OS=Homo sapiens GN=IGHA1 PE=1 SV=2	11916	File384_Scan7086	controllerType=0 controllerNumber=1 scan=7086	25.5357
05111:3	3	R.LAGKPTHVN[+2351.851]VSVVM[+15.995]AEVDGTC[+57.021].Y	HexNAc(4)Hex(5)Fuc(3)NeuAc(1)	C[+57], M[+16], N[+2352]	1517.64	3	4550.92	4551.92	-1	-0.8	332	CRagged	331.18	233.12	4.36	8.57	41	>sp|P01876|IGHA1_HUMAN Immunoglobulin heavy constant alpha 1 OS=Homo sapiens GN=IGHA1 PE=1 SV=2	11916	File384_Scan7219	controllerType=0 controllerNumber=1 scan=7219	25.871
04985:3	3	R.LAGKPTHVN[+2553.910]VSVVM[+15.995]AEVDGTC[+57.021].Y	HexNAc(5)Hex(5)Fuc(1)NeuAc(2)	C[+57], M[+16], N[+2554]	1585.33	3	4753.97	4753.98	0	-2.4	332	CRagged	367.19	157.94	157.94	7.75	41	>sp|P01876|IGHA1_HUMAN Immunoglobulin heavy constant alpha 1 OS=Homo sapiens GN=IGHA1 PE=1 SV=2	11916	File384_Scan7088	controllerType=0 controllerNumber=1 scan=7088	25.5396
05057:4	3	R.LAGKPTHVN[+2580.957]VSVVM[+15.995]AEVDGTC[+57.021].Y	HexNAc(8)Hex(5)Fuc(1)	C[+57], M[+16], N[+2581]	1196.25	4	4781.99	4781.03	1	-9.2	332	CRagged	401.37	331.65	213.87	8.44	41	>sp|P01876|IGHA1_HUMAN Immunoglobulin heavy constant alpha 1 OS=Homo sapiens GN=IGHA1 PE=1 SV=2	11916	File384_Scan7163	controllerType=0 controllerNumber=1 scan=7163	25.7258
04974:3	3	R.LAGKPTHVN[+2350.830]VSVVM[+15.995]AEVDGTC[+57.021].Y	HexNAc(4)Hex(5)Fuc(1)NeuAc(2)	C[+57], M[+16], N[+2351]	1517.64	3	4550.91	4550.9	0	1.1	332	CRagged	404.73	279.02	4.06	9.56	41	>sp|P01876|IGHA1_HUMAN Immunoglobulin heavy constant alpha 1 OS=Homo sapiens GN=IGHA1 PE=1 SV=2	11916	File384_Scan7077	controllerType=0 controllerNumber=1 scan=7077	25.5109
05106:4	3	R.LAGKPTHVN[+2351.851]VSVVM[+15.995]AEVDGTC[+57.021].Y	HexNAc(4)Hex(5)Fuc(3)NeuAc(1)	C[+57], M[+16], N[+2352]	1138.49	4	4550.92	4551.92	-1	-0.4	332	CRagged	460.61	248.73	5.87	9.33	41	>sp|P01876|IGHA1_HUMAN Immunoglobulin heavy constant alpha 1 OS=Homo sapiens GN=IGHA1 PE=1 SV=2	11916	File384_Scan7214	controllerType=0 controllerNumber=1 scan=7214	25.8564
05104:4	3	R.LAGKPTHVN[+2351.851]VSVVM[+15.995]AEVDGTC[+57.021].Y	HexNAc(4)Hex(5)Fuc(3)NeuAc(1)	C[+57], M[+16], N[+2352]	1138.49	4	4550.92	4551.92	-1	-0.4	332	CRagged	466.8	390.4	5.87	11.08	41	>sp|P01876|IGHA1_HUMAN Immunoglobulin heavy constant alpha 1 OS=Homo sapiens GN=IGHA1 PE=1 SV=2	11916	File384_Scan7212	controllerType=0 controllerNumber=1 scan=7212	25.8475
05110:4	3	R.LAGKPTHVN[+2553.910]VSVVM[+15.995]AEVDGTC[+57.021].Y	HexNAc(5)Hex(5)Fuc(1)NeuAc(2)	C[+57], M[+16], N[+2554]	1189.25	4	4754	4753.98	0	2.9	332	CRagged	490.36	292.07	231.82	9.21	41	>sp|P01876|IGHA1_HUMAN Immunoglobulin heavy constant alpha 1 OS=Homo sapiens GN=IGHA1 PE=1 SV=2	11916	File384_Scan7218	controllerType=0 controllerNumber=1 scan=7218	25.8671
04976:3	3	R.LAGKPTHVN[+2350.830]VSVVM[+15.995]AEVDGTC[+57.021].Y	HexNAc(4)Hex(5)Fuc(1)NeuAc(2)	C[+57], M[+16], N[+2351]	1517.64	3	4550.91	4550.9	0	1.1	332	CRagged	493.29	371.77	4.06	10.07	41	>sp|P01876|IGHA1_HUMAN Immunoglobulin heavy constant alpha 1 OS=Homo sapiens GN=IGHA1 PE=1 SV=2	11916	File384_Scan7079	controllerType=0 controllerNumber=1 scan=7079	25.5177
04975:4	3	R.LAGKPTHVN[+2350.830]VSVVM[+15.995]AEVDGTC[+57.021].Y	HexNAc(4)Hex(5)Fuc(1)NeuAc(2)	C[+57], M[+16], N[+2351]	1138.48	4	4550.91	4550.9	0	0.3	332	CRagged	516.55	420.86	7.8	11.43	41	>sp|P01876|IGHA1_HUMAN Immunoglobulin heavy constant alpha 1 OS=Homo sapiens GN=IGHA1 PE=1 SV=2	11916	File384_Scan7078	controllerType=0 controllerNumber=1 scan=7078	25.5138
04973:4	3	R.LAGKPTHVN[+2350.830]VSVVM[+15.995]AEVDGTC[+57.021].Y	HexNAc(4)Hex(5)Fuc(1)NeuAc(2)	C[+57], M[+16], N[+2351]	1138.48	4	4550.91	4550.9	0	0.3	332	CRagged	517.1	451.63	7.8	11.43	41	>sp|P01876|IGHA1_HUMAN Immunoglobulin heavy constant alpha 1 OS=Homo sapiens GN=IGHA1 PE=1 SV=2	11916	File384_Scan7076	controllerType=0 controllerNumber=1 scan=7076	25.5083
05001:4	3	R.LAGKPTHVN[+2553.910]VSVVM[+15.995]AEVDGTC[+57.021].Y	HexNAc(5)Hex(5)Fuc(1)NeuAc(2)	C[+57], M[+16], N[+2554]	1189.25	4	4753.99	4753.98	0	0.9	332	CRagged	525.11	343.58	149.5	10.05	41	>sp|P01876|IGHA1_HUMAN Immunoglobulin heavy constant alpha 1 OS=Homo sapiens GN=IGHA1 PE=1 SV=2	11916	File384_Scan7105	controllerType=0 controllerNumber=1 scan=7105	25.5846
05003:4	3	R.LAGKPTHVN[+2553.910]VSVVM[+15.995]AEVDGTC[+57.021].Y	HexNAc(5)Hex(5)Fuc(1)NeuAc(2)	C[+57], M[+16], N[+2554]	1189.25	4	4753.99	4753.98	0	0.9	332	CRagged	527.92	294.65	223.38	9.81	41	>sp|P01876|IGHA1_HUMAN Immunoglobulin heavy constant alpha 1 OS=Homo sapiens GN=IGHA1 PE=1 SV=2	11916	File384_Scan7107	controllerType=0 controllerNumber=1 scan=7107	25.5936
05108:4	3	R.LAGKPTHVN[+2553.910]VSVVM[+15.995]AEVDGTC[+57.021].Y	HexNAc(5)Hex(5)Fuc(1)NeuAc(2)	C[+57], M[+16], N[+2554]	1189.25	4	4754	4753.98	0	2.9	332	CRagged	648.61	410.04	297.9	13.57	41	>sp|P01876|IGHA1_HUMAN Immunoglobulin heavy constant alpha 1 OS=Homo sapiens GN=IGHA1 PE=1 SV=2	11916	File384_Scan7216	controllerType=0 controllerNumber=1 scan=7216	25.8619
05347:3	3	R.LAGKPTHVN[+2075.730]VSVVMAEVDGTC[+57.021]Y.-	HexNAc(4)Hex(6)NeuAc(1)	C[+57], N[+2076]	1474.96	3	4422.88	4422.87	0	1.4	332	CRagged	33.17	0.57	0.57	2.9	41	>sp|P01876|IGHA1_HUMAN Immunoglobulin heavy constant alpha 1 OS=Homo sapiens GN=IGHA1 PE=1 SV=2	11916	File384_Scan7465	controllerType=0 controllerNumber=1 scan=7465	26.4653
05416:3	3	R.LAGKPTHVNVSVVM[+15.995]AEVDGTC[+57.021]Y.-		C[+57], M[+16]	788.385	3	2363.14	2363.14	0	1.6	332	CRagged	75.9	75.9	75.9	2.2	41	>sp|P01876|IGHA1_HUMAN Immunoglobulin heavy constant alpha 1 OS=Homo sapiens GN=IGHA1 PE=1 SV=2	11916	File384_Scan7537	controllerType=0 controllerNumber=1 scan=7537	26.6304
05309:3	3	R.LAGKPTHVNVSVVM[+15.995]AEVDGTC[+57.021]Y.-		C[+57], M[+16]	788.385	3	2363.14	2363.14	0	1.1	332	CRagged	317.18	317.18	317.18	7.76	41	>sp|P01876|IGHA1_HUMAN Immunoglobulin heavy constant alpha 1 OS=Homo sapiens GN=IGHA1 PE=1 SV=2	11916	File384_Scan7425	controllerType=0 controllerNumber=1 scan=7425	26.3689
05779:4	3	R.LAGKPTHVN[+2596.952]VSVVM[+15.995]AEVDGTC[+57.021]Y.-	HexNAc(8)Hex(6)	C[+57], M[+16], N[+2597]	1241.02	4	4961.04	4960.09	1	-10.1	332	CRagged	4.76	4.76	4.76	2.01	41	>sp|P01876|IGHA1_HUMAN Immunoglobulin heavy constant alpha 1 OS=Homo sapiens GN=IGHA1 PE=1 SV=2	11916	File384_Scan7932	controllerType=0 controllerNumber=1 scan=7932	27.5729
05781:4	3	R.LAGKPTHVN[+2596.952]VSVVM[+15.995]AEVDGTC[+57.021]Y.-	HexNAc(8)Hex(6)	C[+57], M[+16], N[+2597]	1241.02	4	4961.04	4960.09	1	-10.1	332	CRagged	25.07	9.05	9.05	1.47	41	>sp|P01876|IGHA1_HUMAN Immunoglobulin heavy constant alpha 1 OS=Homo sapiens GN=IGHA1 PE=1 SV=2	11916	File384_Scan7934	controllerType=0 controllerNumber=1 scan=7934	27.578
05682:4	3	R.LAGKPTHVN[+2596.952]VSVVM[+15.995]AEVDGTC[+57.021]Y.-	HexNAc(8)Hex(6)	C[+57], M[+16], N[+2597]	1241.02	4	4961.04	4960.09	1	-9.7	332	CRagged	82.52	59.54	59.54	2.95	41	>sp|P01876|IGHA1_HUMAN Immunoglobulin heavy constant alpha 1 OS=Homo sapiens GN=IGHA1 PE=1 SV=2	11916	File384_Scan7825	controllerType=0 controllerNumber=1 scan=7825	27.3057
05354:4	3	R.LAGKPTHVN[+2059.735]VSVVM[+15.995]AEVDGTC[+57.021]Y.-	HexNAc(4)Hex(5)Fuc(1)NeuAc(1)	C[+57], M[+16], N[+2060]	1106.48	4	4422.88	4422.87	0	1.6	332	CRagged	91.89	10.81	10.81	2.33	41	>sp|P01876|IGHA1_HUMAN Immunoglobulin heavy constant alpha 1 OS=Homo sapiens GN=IGHA1 PE=1 SV=2	11916	File384_Scan7472	controllerType=0 controllerNumber=1 scan=7472	26.4798
04292:4	3	R.LAGKPTHVN[+2204.772]VSVVM[+15.995]AEVDGTC[+57.021]Y.-	HexNAc(4)Hex(5)NeuAc(2)	C[+57], M[+16], N[+2205]	1142.48	4	4566.9	4567.91	-1	-0.8	332	CRagged	131.75	40.81	40.81	4.44	41	>sp|P01876|IGHA1_HUMAN Immunoglobulin heavy constant alpha 1 OS=Homo sapiens GN=IGHA1 PE=1 SV=2	11916	File384_Scan6314	controllerType=0 controllerNumber=1 scan=6314	23.6134
05956:4	3	R.LAGKPTHVN[+2580.957]VSVVM[+15.995]AEVDGTC[+57.021]Y.-	HexNAc(8)Hex(5)Fuc(1)	C[+57], M[+16], N[+2581]	1237.02	4	4945.05	4944.09	1	-9.8	332	CRagged	151.23	151.23	25.54	4.86	41	>sp|P01876|IGHA1_HUMAN Immunoglobulin heavy constant alpha 1 OS=Homo sapiens GN=IGHA1 PE=1 SV=2	11916	File384_Scan8116	controllerType=0 controllerNumber=1 scan=8116	28.006
05932:4	3	R.LAGKPTHVN[+2350.830]VSVVM[+15.995]AEVDGTC[+57.021]Y.-	HexNAc(4)Hex(5)Fuc(1)NeuAc(2)	C[+57], M[+16], N[+2351]	1179.25	4	4713.97	4713.97	0	1.1	332	CRagged	153.3	98.86	4.23	3.99	41	>sp|P01876|IGHA1_HUMAN Immunoglobulin heavy constant alpha 1 OS=Homo sapiens GN=IGHA1 PE=1 SV=2	11916	File384_Scan8091	controllerType=0 controllerNumber=1 scan=8091	27.9539
04927:3	3	R.LAGKPTHVN[+1216.423]VSVVM[+15.995]AEVDGTC[+57.021]Y.-	HexNAc(2)Hex(5)	C[+57], M[+16], N[+1216]	1193.86	3	3579.56	3579.56	0	1.2	332	CRagged	159.88	117.76	117.76	4.56	41	>sp|P01876|IGHA1_HUMAN Immunoglobulin heavy constant alpha 1 OS=Homo sapiens GN=IGHA1 PE=1 SV=2	11916	File384_Scan7028	controllerType=0 controllerNumber=1 scan=7028	25.4024
05415:4	3	R.LAGKPTHVN[+2262.814]VSVVM[+15.995]AEVDGTC[+57.021]Y.-	HexNAc(5)Hex(5)Fuc(1)NeuAc(1)	C[+57], M[+16], N[+2263]	1157.25	4	4625.96	4625.95	0	2.1	332	CRagged	192.36	158.33	41.74	5.71	41	>sp|P01876|IGHA1_HUMAN Immunoglobulin heavy constant alpha 1 OS=Homo sapiens GN=IGHA1 PE=1 SV=2	11916	File384_Scan7536	controllerType=0 controllerNumber=1 scan=7536	26.6289
04295:3	3	R.LAGKPTHVN[+2204.772]VSVVM[+15.995]AEVDGTC[+57.021]Y.-	HexNAc(4)Hex(5)NeuAc(2)	C[+57], M[+16], N[+2205]	1522.97	3	4566.91	4567.91	-1	-0.1	332	CRagged	195.21	87.99	76.26	4.95	41	>sp|P01876|IGHA1_HUMAN Immunoglobulin heavy constant alpha 1 OS=Homo sapiens GN=IGHA1 PE=1 SV=2	11916	File384_Scan6317	controllerType=0 controllerNumber=1 scan=6317	23.6221
05850:4	3	R.LAGKPTHVN[+2580.957]VSVVM[+15.995]AEVDGTC[+57.021]Y.-	HexNAc(8)Hex(5)Fuc(1)	C[+57], M[+16], N[+2581]	1237.02	4	4945.05	4944.09	1	-9.5	332	CRagged	196.36	196.36	86.71	5.08	41	>sp|P01876|IGHA1_HUMAN Immunoglobulin heavy constant alpha 1 OS=Homo sapiens GN=IGHA1 PE=1 SV=2	11916	File384_Scan8006	controllerType=0 controllerNumber=1 scan=8006	27.7451
04796:4	3	R.LAGKPTHVN[+2204.772]VSVVM[+15.995]AEVDGTC[+57.021]Y.-	HexNAc(4)Hex(5)NeuAc(2)	C[+57], M[+16], N[+2205]	1142.48	4	4566.91	4567.91	-1	-0.1	332	CRagged	207.47	93.78	93.78	5.03	41	>sp|P01876|IGHA1_HUMAN Immunoglobulin heavy constant alpha 1 OS=Homo sapiens GN=IGHA1 PE=1 SV=2	11916	File384_Scan6892	controllerType=0 controllerNumber=1 scan=6892	25.0604
04297:3	3	R.LAGKPTHVN[+2204.772]VSVVM[+15.995]AEVDGTC[+57.021]Y.-	HexNAc(4)Hex(5)NeuAc(2)	C[+57], M[+16], N[+2205]	1522.97	3	4566.91	4567.91	-1	-0.1	332	CRagged	208.92	104.54	104.54	3.91	41	>sp|P01876|IGHA1_HUMAN Immunoglobulin heavy constant alpha 1 OS=Homo sapiens GN=IGHA1 PE=1 SV=2	11916	File384_Scan6319	controllerType=0 controllerNumber=1 scan=6319	23.6261
04694:4	3	R.LAGKPTHVN[+2204.772]VSVVM[+15.995]AEVDGTC[+57.021]Y.-	HexNAc(4)Hex(5)NeuAc(2)	C[+57], M[+16], N[+2205]	1142.48	4	4566.91	4567.91	-1	1.6	332	CRagged	219.5	104.5	104.5	5.81	41	>sp|P01876|IGHA1_HUMAN Immunoglobulin heavy constant alpha 1 OS=Homo sapiens GN=IGHA1 PE=1 SV=2	11916	File384_Scan6786	controllerType=0 controllerNumber=1 scan=6786	24.7716
05911:3	3	R.LAGKPTHVN[+2350.830]VSVVM[+15.995]AEVDGTC[+57.021]Y.-	HexNAc(4)Hex(5)Fuc(1)NeuAc(2)	C[+57], M[+16], N[+2351]	1571.99	3	4713.96	4713.97	0	-1.6	332	CRagged	219.91	34.41	9.2	2.72	41	>sp|P01876|IGHA1_HUMAN Immunoglobulin heavy constant alpha 1 OS=Homo sapiens GN=IGHA1 PE=1 SV=2	11916	File384_Scan8069	controllerType=0 controllerNumber=1 scan=8069	27.8999
05889:3	3	R.LAGKPTHVN[+2350.830]VSVVM[+15.995]AEVDGTC[+57.021]Y.-	HexNAc(4)Hex(5)Fuc(1)NeuAc(2)	C[+57], M[+16], N[+2351]	1572.33	3	4714.97	4713.97	1	0.4	332	CRagged	226.63	174.21	6.16	7.33	41	>sp|P01876|IGHA1_HUMAN Immunoglobulin heavy constant alpha 1 OS=Homo sapiens GN=IGHA1 PE=1 SV=2	11916	File384_Scan8046	controllerType=0 controllerNumber=1 scan=8046	27.8447
04327:4	3	R.LAGKPTHVN[+2116.756]VSVVM[+15.995]AEVDGTC[+57.021]Y.-	HexNAc(5)Hex(5)NeuAc(1)	C[+57], M[+16], N[+2117]	1120.48	4	4478.89	4479.89	-1	0.2	332	CRagged	239.93	74.98	74.98	4.95	41	>sp|P01876|IGHA1_HUMAN Immunoglobulin heavy constant alpha 1 OS=Homo sapiens GN=IGHA1 PE=1 SV=2	11916	File384_Scan6371	controllerType=0 controllerNumber=1 scan=6371	23.7619
05590:4	3	R.LAGKPTHVN[+2569.905]VSVVM[+15.995]AEVDGTC[+57.021]Y.-	HexNAc(5)Hex(6)NeuAc(2)	C[+57], M[+16], N[+2570]	1234.02	4	4933.05	4933.04	0	1.1	332	CRagged	244.65	143.8	11.81	7.36	41	>sp|P01876|IGHA1_HUMAN Immunoglobulin heavy constant alpha 1 OS=Homo sapiens GN=IGHA1 PE=1 SV=2	11916	File384_Scan7723	controllerType=0 controllerNumber=1 scan=7723	27.0528
04799:3	3	R.LAGKPTHVN[+2204.772]VSVVM[+15.995]AEVDGTC[+57.021]Y.-	HexNAc(4)Hex(5)NeuAc(2)	C[+57], M[+16], N[+2205]	1522.97	3	4566.91	4567.91	-1	0.5	332	CRagged	252.15	127.36	127.36	6.05	41	>sp|P01876|IGHA1_HUMAN Immunoglobulin heavy constant alpha 1 OS=Homo sapiens GN=IGHA1 PE=1 SV=2	11916	File384_Scan6895	controllerType=0 controllerNumber=1 scan=6895	25.0734
04702:3	3	R.LAGKPTHVN[+2204.772]VSVVM[+15.995]AEVDGTC[+57.021]Y.-	HexNAc(4)Hex(5)NeuAc(2)	C[+57], M[+16], N[+2205]	1522.97	3	4566.91	4567.91	-1	0.7	332	CRagged	255.15	113.7	113.7	5.92	41	>sp|P01876|IGHA1_HUMAN Immunoglobulin heavy constant alpha 1 OS=Homo sapiens GN=IGHA1 PE=1 SV=2	11916	File384_Scan6794	controllerType=0 controllerNumber=1 scan=6794	24.7948
05852:4	3	R.LAGKPTHVN[+2580.957]VSVVM[+15.995]AEVDGTC[+57.021]Y.-	HexNAc(8)Hex(5)Fuc(1)	C[+57], M[+16], N[+2581]	1237.02	4	4945.05	4944.09	1	-9.5	332	CRagged	282.66	167.4	167.4	5.87	41	>sp|P01876|IGHA1_HUMAN Immunoglobulin heavy constant alpha 1 OS=Homo sapiens GN=IGHA1 PE=1 SV=2	11916	File384_Scan8008	controllerType=0 controllerNumber=1 scan=8008	27.7496
05349:3	3	R.LAGKPTHVN[+2059.735]VSVVM[+15.995]AEVDGTC[+57.021]Y.-	HexNAc(4)Hex(5)Fuc(1)NeuAc(1)	C[+57], M[+16], N[+2060]	1474.96	3	4422.88	4422.87	0	1.4	332	CRagged	305.41	131.7	71.02	6.59	41	>sp|P01876|IGHA1_HUMAN Immunoglobulin heavy constant alpha 1 OS=Homo sapiens GN=IGHA1 PE=1 SV=2	11916	File384_Scan7467	controllerType=0 controllerNumber=1 scan=7467	26.4694
05417:4	3	R.LAGKPTHVN[+2262.814]VSVVM[+15.995]AEVDGTC[+57.021]Y.-	HexNAc(5)Hex(5)Fuc(1)NeuAc(1)	C[+57], M[+16], N[+2263]	1157.25	4	4625.96	4625.95	0	2.1	332	CRagged	340.87	197.05	41.98	7.09	41	>sp|P01876|IGHA1_HUMAN Immunoglobulin heavy constant alpha 1 OS=Homo sapiens GN=IGHA1 PE=1 SV=2	11916	File384_Scan7538	controllerType=0 controllerNumber=1 scan=7538	26.6326
05931:4	3	R.LAGKPTHVN[+2553.910]VSVVM[+15.995]AEVDGTC[+57.021]Y.-	HexNAc(5)Hex(5)Fuc(1)NeuAc(2)	C[+57], M[+16], N[+2554]	1230.02	4	4917.05	4917.05	0	0.9	332	CRagged	359.96	209.88	174.58	8.37	41	>sp|P01876|IGHA1_HUMAN Immunoglobulin heavy constant alpha 1 OS=Homo sapiens GN=IGHA1 PE=1 SV=2	11916	File384_Scan8090	controllerType=0 controllerNumber=1 scan=8090	27.9498
05878:4	3	R.LAGKPTHVN[+2350.830]VSVVM[+15.995]AEVDGTC[+57.021]Y.-	HexNAc(4)Hex(5)Fuc(1)NeuAc(2)	C[+57], M[+16], N[+2351]	1179.24	4	4713.94	4713.97	0	-6.6	332	CRagged	361.86	291.66	32.57	7.45	41	>sp|P01876|IGHA1_HUMAN Immunoglobulin heavy constant alpha 1 OS=Homo sapiens GN=IGHA1 PE=1 SV=2	11916	File384_Scan8035	controllerType=0 controllerNumber=1 scan=8035	27.8171
05929:4	3	R.LAGKPTHVN[+2553.910]VSVVM[+15.995]AEVDGTC[+57.021]Y.-	HexNAc(5)Hex(5)Fuc(1)NeuAc(2)	C[+57], M[+16], N[+2554]	1230.02	4	4917.05	4917.05	0	0.9	332	CRagged	363.46	247.99	154.4	8.73	41	>sp|P01876|IGHA1_HUMAN Immunoglobulin heavy constant alpha 1 OS=Homo sapiens GN=IGHA1 PE=1 SV=2	11916	File384_Scan8088	controllerType=0 controllerNumber=1 scan=8088	27.946
05958:4	3	R.LAGKPTHVN[+2580.957]VSVVM[+15.995]AEVDGTC[+57.021]Y.-	HexNAc(8)Hex(5)Fuc(1)	C[+57], M[+16], N[+2581]	1237.02	4	4945.05	4944.09	1	-9.8	332	CRagged	385.96	243.08	203.67	7.45	41	>sp|P01876|IGHA1_HUMAN Immunoglobulin heavy constant alpha 1 OS=Homo sapiens GN=IGHA1 PE=1 SV=2	11916	File384_Scan8118	controllerType=0 controllerNumber=1 scan=8118	28.0096
05816:4	3	R.LAGKPTHVN[+2350.830]VSVVM[+15.995]AEVDGTC[+57.021]Y.-	HexNAc(4)Hex(5)Fuc(1)NeuAc(2)	C[+57], M[+16], N[+2351]	1179.25	4	4713.97	4713.97	0	-0.2	332	CRagged	410.95	294.64	9.2	8.74	41	>sp|P01876|IGHA1_HUMAN Immunoglobulin heavy constant alpha 1 OS=Homo sapiens GN=IGHA1 PE=1 SV=2	11916	File384_Scan7970	controllerType=0 controllerNumber=1 scan=7970	27.6547
05891:3	3	R.LAGKPTHVN[+2350.830]VSVVM[+15.995]AEVDGTC[+57.021]Y.-	HexNAc(4)Hex(5)Fuc(1)NeuAc(2)	C[+57], M[+16], N[+2351]	1572.33	3	4714.97	4713.97	1	0.4	332	CRagged	411.1	243.17	6.16	8.82	41	>sp|P01876|IGHA1_HUMAN Immunoglobulin heavy constant alpha 1 OS=Homo sapiens GN=IGHA1 PE=1 SV=2	11916	File384_Scan8048	controllerType=0 controllerNumber=1 scan=8048	27.849
05814:4	3	R.LAGKPTHVN[+2350.830]VSVVM[+15.995]AEVDGTC[+57.021]Y.-	HexNAc(4)Hex(5)Fuc(1)NeuAc(2)	C[+57], M[+16], N[+2351]	1179.25	4	4713.97	4713.97	0	-0.2	332	CRagged	419.85	331.95	9.2	8.94	41	>sp|P01876|IGHA1_HUMAN Immunoglobulin heavy constant alpha 1 OS=Homo sapiens GN=IGHA1 PE=1 SV=2	11916	File384_Scan7968	controllerType=0 controllerNumber=1 scan=7968	27.6502
04929:3	3	R.LAGKPTHVN[+1216.423]VSVVM[+15.995]AEVDGTC[+57.021]Y.-	HexNAc(2)Hex(5)	C[+57], M[+16], N[+1216]	1193.86	3	3579.56	3579.56	0	1.2	332	CRagged	456.08	297.1	297.1	8.97	41	>sp|P01876|IGHA1_HUMAN Immunoglobulin heavy constant alpha 1 OS=Homo sapiens GN=IGHA1 PE=1 SV=2	11916	File384_Scan7030	controllerType=0 controllerNumber=1 scan=7030	25.4063
05880:4	3	R.LAGKPTHVN[+2350.830]VSVVM[+15.995]AEVDGTC[+57.021]Y.-	HexNAc(4)Hex(5)Fuc(1)NeuAc(2)	C[+57], M[+16], N[+2351]	1179.24	4	4713.94	4713.97	0	-6.6	332	CRagged	479.26	345.41	59.01	7.92	41	>sp|P01876|IGHA1_HUMAN Immunoglobulin heavy constant alpha 1 OS=Homo sapiens GN=IGHA1 PE=1 SV=2	11916	File384_Scan8037	controllerType=0 controllerNumber=1 scan=8037	27.8251
00222:2	4	K.EAVEHLQK.S			477.256	2	953.506	953.505	0	0.6	44	Specific	573.6	309.29	309.29	7.75	33	>sp|P06727|APOA4_HUMAN Apolipoprotein A-IV OS=Homo sapiens GN=APOA4 PE=1 SV=3	790	File384_Scan1888	controllerType=0 controllerNumber=1 scan=1888	13.7218
00334:2	4	K.EAVEHLQK.S			477.256	2	953.505	953.505	0	0.3	44	Specific	656.65	309.25	309.25	10.86	33	>sp|P06727|APOA4_HUMAN Apolipoprotein A-IV OS=Homo sapiens GN=APOA4 PE=1 SV=3	790	File384_Scan2005	controllerType=0 controllerNumber=1 scan=2005	14.0003
10233:2	4	K.SELTQQLNALFQDK.L			817.924	2	1634.84	1634.84	0	1.2	52	Specific	427.58	346.81	346.81	7.3	33	>sp|P06727|APOA4_HUMAN Apolipoprotein A-IV OS=Homo sapiens GN=APOA4 PE=1 SV=3	790	File384_Scan12623	controllerType=0 controllerNumber=1 scan=12623	37.3735
10100:2	4	K.SELTQQLNALFQDK.L			817.923	2	1634.84	1634.84	0	0.7	52	Specific	688.83	500.05	500.05	13.42	33	>sp|P06727|APOA4_HUMAN Apolipoprotein A-IV OS=Homo sapiens GN=APOA4 PE=1 SV=3	790	File384_Scan12480	controllerType=0 controllerNumber=1 scan=12480	37.0719
09999:2	4	K.SELTQQLNALFQDK.L			817.924	2	1634.84	1634.84	0	1.1	52	Specific	807.78	651.66	651.66	16.56	33	>sp|P06727|APOA4_HUMAN Apolipoprotein A-IV OS=Homo sapiens GN=APOA4 PE=1 SV=3	790	File384_Scan12374	controllerType=0 controllerNumber=1 scan=12374	36.8596
04083:2	4	K.LGEVNTYAGDLQK.K			704.36	2	1407.71	1407.71	0	0.7	66	Specific	767.95	506.2	506.2	15.42	33	>sp|P06727|APOA4_HUMAN Apolipoprotein A-IV OS=Homo sapiens GN=APOA4 PE=1 SV=3	790	File384_Scan6034	controllerType=0 controllerNumber=1 scan=6034	22.9311
04680:3	4	K.KLVPFATELHER.L			480.605	3	1439.8	1439.8	0	0.6	79	Specific	450.76	405.19	405.19	9.24	33	>sp|P06727|APOA4_HUMAN Apolipoprotein A-IV OS=Homo sapiens GN=APOA4 PE=1 SV=3	790	File384_Scan6771	controllerType=0 controllerNumber=1 scan=6771	24.7354
05497:3	4	K.LVPFATELHER.L			437.907	3	1311.71	1311.71	0	-0.3	80	Specific	378.79	340.81	340.81	7.13	33	>sp|P06727|APOA4_HUMAN Apolipoprotein A-IV OS=Homo sapiens GN=APOA4 PE=1 SV=3	790	File384_Scan7623	controllerType=0 controllerNumber=1 scan=7623	26.8258
05398:2	4	K.LVPFATELHER.L			656.357	2	1311.71	1311.71	0	0.7	80	Specific	524.41	339.82	339.82	7.94	33	>sp|P06727|APOA4_HUMAN Apolipoprotein A-IV OS=Homo sapiens GN=APOA4 PE=1 SV=3	790	File384_Scan7518	controllerType=0 controllerNumber=1 scan=7518	26.5888
05382:3	4	K.LVPFATELHER.L			437.907	3	1311.71	1311.71	0	0	80	Specific	646.02	562.73	562.73	12.2	33	>sp|P06727|APOA4_HUMAN Apolipoprotein A-IV OS=Homo sapiens GN=APOA4 PE=1 SV=3	790	File384_Scan7501	controllerType=0 controllerNumber=1 scan=7501	26.5418
04999:3	4	K.LKEEIGKELEELR.A			529.298	3	1585.88	1585.88	0	0.5	98	Specific	588.68	408.74	408.74	9.57	33	>sp|P06727|APOA4_HUMAN Apolipoprotein A-IV OS=Homo sapiens GN=APOA4 PE=1 SV=3	790	File384_Scan7102	controllerType=0 controllerNumber=1 scan=7102	25.5775
04784:3	4	K.LKEEIGKELEELR.A			529.298	3	1585.88	1585.88	0	0.5	98	Specific	616.46	443.49	443.49	10.57	33	>sp|P06727|APOA4_HUMAN Apolipoprotein A-IV OS=Homo sapiens GN=APOA4 PE=1 SV=3	790	File384_Scan6879	controllerType=0 controllerNumber=1 scan=6879	25.0271
04663:3	4	K.LKEEIGKELEELR.A			529.298	3	1585.88	1585.88	0	0.3	98	Specific	928.77	704.24	704.24	16.57	33	>sp|P06727|APOA4_HUMAN Apolipoprotein A-IV OS=Homo sapiens GN=APOA4 PE=1 SV=3	790	File384_Scan6752	controllerType=0 controllerNumber=1 scan=6752	24.6924
01090:3	4	R.LLPHANEVSQK.I			412.563	3	1235.68	1235.67	0	0.9	113	Specific	482.87	379.64	379.64	8.5	33	>sp|P06727|APOA4_HUMAN Apolipoprotein A-IV OS=Homo sapiens GN=APOA4 PE=1 SV=3	790	File384_Scan2794	controllerType=0 controllerNumber=1 scan=2794	15.7734
01092:2	4	R.LLPHANEVSQK.I			618.341	2	1235.68	1235.67	0	0.7	113	Specific	577.79	386.22	386.22	9.75	33	>sp|P06727|APOA4_HUMAN Apolipoprotein A-IV OS=Homo sapiens GN=APOA4 PE=1 SV=3	790	File384_Scan2796	controllerType=0 controllerNumber=1 scan=2796	15.7807
04004:2	4	R.LEPYADQLR.T			552.788	2	1104.57	1104.57	0	0	135	Specific	358.87	137.9	137.9	5.36	33	>sp|P06727|APOA4_HUMAN Apolipoprotein A-IV OS=Homo sapiens GN=APOA4 PE=1 SV=3	790	File384_Scan5924	controllerType=0 controllerNumber=1 scan=5924	22.6427
03892:2	4	R.LEPYADQLR.T			552.788	2	1104.57	1104.57	0	0	135	Specific	493.39	149.2	149.2	6.57	33	>sp|P06727|APOA4_HUMAN Apolipoprotein A-IV OS=Homo sapiens GN=APOA4 PE=1 SV=3	790	File384_Scan5793	controllerType=0 controllerNumber=1 scan=5793	22.3463
01437:2	4	R.TQVNTQAEQLR.R			644.337	2	1287.67	1287.67	0	0.6	144	Specific	448.75	269.36	269.36	7.05	33	>sp|P06727|APOA4_HUMAN Apolipoprotein A-IV OS=Homo sapiens GN=APOA4 PE=1 SV=3	790	File384_Scan3157	controllerType=0 controllerNumber=1 scan=3157	16.5244
01307:2	4	R.TQVNTQAEQLR.R			644.337	2	1287.67	1287.67	0	0.5	144	Specific	687.77	436.78	436.78	13.42	33	>sp|P06727|APOA4_HUMAN Apolipoprotein A-IV OS=Homo sapiens GN=APOA4 PE=1 SV=3	790	File384_Scan3021	controllerType=0 controllerNumber=1 scan=3021	16.2486
00786:3	4	R.TQVNTQAEQLRR.Q			481.927	3	1443.77	1443.77	0	0.2	144	Specific	695.23	478.37	478.37	12.94	33	>sp|P06727|APOA4_HUMAN Apolipoprotein A-IV OS=Homo sapiens GN=APOA4 PE=1 SV=3	790	File384_Scan2476	controllerType=0 controllerNumber=1 scan=2476	15.0912
01762:2	4	R.QLTPYAQR.M			488.764	2	976.521	976.521	0	0.4	156	Specific	590.48	209.08	209.08	9.18	33	>sp|P06727|APOA4_HUMAN Apolipoprotein A-IV OS=Homo sapiens GN=APOA4 PE=1 SV=3	790	File384_Scan3500	controllerType=0 controllerNumber=1 scan=3500	17.2171
03437:2	4	R.ENADSLQASLR.P			602.303	2	1203.6	1203.6	0	1.1	170	Specific	300.31	215.21	215.21	5.9	33	>sp|P06727|APOA4_HUMAN Apolipoprotein A-IV OS=Homo sapiens GN=APOA4 PE=1 SV=3	790	File384_Scan5251	controllerType=0 controllerNumber=1 scan=5251	21.1317
03881:4	4	R.ENADSLQASLRPHADELK.A			499.254	4	1993.99	1993.99	0	0.2	170	Specific	393.49	368.74	368.74	9	33	>sp|P06727|APOA4_HUMAN Apolipoprotein A-IV OS=Homo sapiens GN=APOA4 PE=1 SV=3	790	File384_Scan5781	controllerType=0 controllerNumber=1 scan=5781	22.3079
03776:3	4	R.ENADSLQASLRPHADELK.A			665.337	3	1994	1993.99	0	1.5	170	Specific	544.53	505.7	505.7	10.53	33	>sp|P06727|APOA4_HUMAN Apolipoprotein A-IV OS=Homo sapiens GN=APOA4 PE=1 SV=3	790	File384_Scan5643	controllerType=0 controllerNumber=1 scan=5643	21.9942
03775:4	4	R.ENADSLQASLRPHADELK.A			499.254	4	1994	1993.99	0	0.8	170	Specific	627.07	622.39	622.39	13.22	33	>sp|P06727|APOA4_HUMAN Apolipoprotein A-IV OS=Homo sapiens GN=APOA4 PE=1 SV=3	790	File384_Scan5642	controllerType=0 controllerNumber=1 scan=5642	21.9926
03699:4	4	R.ENADSLQASLRPHADELK.A			499.253	4	1993.99	1993.99	0	-0.7	170	Specific	718.17	668.34	668.34	15	33	>sp|P06727|APOA4_HUMAN Apolipoprotein A-IV OS=Homo sapiens GN=APOA4 PE=1 SV=3	790	File384_Scan5540	controllerType=0 controllerNumber=1 scan=5540	21.7519
03698:3	4	R.ENADSLQASLRPHADELK.A			665.336	3	1993.99	1993.99	0	-0.4	170	Specific	791.23	727.27	727.27	15.44	33	>sp|P06727|APOA4_HUMAN Apolipoprotein A-IV OS=Homo sapiens GN=APOA4 PE=1 SV=3	790	File384_Scan5539	controllerType=0 controllerNumber=1 scan=5539	21.7504
01788:3	4	K.AKIDQNVEELK.G			429.57	3	1286.7	1286.7	0	0.1	188	Specific	249.01	153.91	153.91	3.78	33	>sp|P06727|APOA4_HUMAN Apolipoprotein A-IV OS=Homo sapiens GN=APOA4 PE=1 SV=3	790	File384_Scan3527	controllerType=0 controllerNumber=1 scan=3527	17.2683
01777:2	4	K.AKIDQNVEELK.G			643.851	2	1286.7	1286.7	0	0.5	188	Specific	592.45	387.07	387.07	10.2	33	>sp|P06727|APOA4_HUMAN Apolipoprotein A-IV OS=Homo sapiens GN=APOA4 PE=1 SV=3	790	File384_Scan3516	controllerType=0 controllerNumber=1 scan=3516	17.248
02490:2	4	K.IDQNVEELK.G			544.285	2	1087.56	1087.56	0	0.2	190	Specific	439.34	214.44	214.44	6.87	33	>sp|P06727|APOA4_HUMAN Apolipoprotein A-IV OS=Homo sapiens GN=APOA4 PE=1 SV=3	790	File384_Scan4261	controllerType=0 controllerNumber=1 scan=4261	18.9237
02364:2	4	K.IDQNVEELK.G			544.285	2	1087.56	1087.56	0	0.6	190	Specific	631.09	265.6	265.6	10.8	33	>sp|P06727|APOA4_HUMAN Apolipoprotein A-IV OS=Homo sapiens GN=APOA4 PE=1 SV=3	790	File384_Scan4130	controllerType=0 controllerNumber=1 scan=4130	18.6329
01390:2	4	K.IDQNVEELKGR.L			650.847	2	1300.69	1300.69	0	1	190	Specific	451.01	186.04	186.04	6.28	33	>sp|P06727|APOA4_HUMAN Apolipoprotein A-IV OS=Homo sapiens GN=APOA4 PE=1 SV=3	790	File384_Scan3108	controllerType=0 controllerNumber=1 scan=3108	16.4188
01374:3	4	K.IDQNVEELKGR.L			434.234	3	1300.69	1300.69	0	0.5	190	Specific	647.89	251.9	251.9	10.01	33	>sp|P06727|APOA4_HUMAN Apolipoprotein A-IV OS=Homo sapiens GN=APOA4 PE=1 SV=3	790	File384_Scan3091	controllerType=0 controllerNumber=1 scan=3091	16.3852
04513:2	4	R.LTPYADEFK.V			542.272	2	1083.54	1083.54	0	1.2	201	Specific	446.62	193.09	193.09	6.65	33	>sp|P06727|APOA4_HUMAN Apolipoprotein A-IV OS=Homo sapiens GN=APOA4 PE=1 SV=3	790	File384_Scan6583	controllerType=0 controllerNumber=1 scan=6583	24.2981
03331:3	4	K.VKIDQTVEELRR.S			495.951	3	1485.84	1485.84	0	0.7	210	Specific	256.23	170.37	170.37	2.92	33	>sp|P06727|APOA4_HUMAN Apolipoprotein A-IV OS=Homo sapiens GN=APOA4 PE=1 SV=3	790	File384_Scan5140	controllerType=0 controllerNumber=1 scan=5140	20.8817
03217:3	4	K.VKIDQTVEELRR.S			495.951	3	1485.84	1485.84	0	-0.2	210	Specific	517.96	446.88	446.88	8.03	33	>sp|P06727|APOA4_HUMAN Apolipoprotein A-IV OS=Homo sapiens GN=APOA4 PE=1 SV=3	790	File384_Scan5021	controllerType=0 controllerNumber=1 scan=5021	20.6349
03100:2	4	K.IDQTVEELR.R			551.791	2	1102.57	1102.57	0	0.8	212	Specific	572.35	169.93	169.93	8.32	33	>sp|P06727|APOA4_HUMAN Apolipoprotein A-IV OS=Homo sapiens GN=APOA4 PE=1 SV=3	790	File384_Scan4899	controllerType=0 controllerNumber=1 scan=4899	20.3732
02183:3	4	K.IDQTVEELRR.S			420.229	3	1258.67	1258.67	0	-1.2	212	Specific	194.5	88.22	88.22	1.57	33	>sp|P06727|APOA4_HUMAN Apolipoprotein A-IV OS=Homo sapiens GN=APOA4 PE=1 SV=3	790	File384_Scan3941	controllerType=0 controllerNumber=1 scan=3941	18.1567
02053:3	4	K.IDQTVEELRR.S			420.23	3	1258.67	1258.67	0	0	212	Specific	268.8	121.44	121.44	2.92	33	>sp|P06727|APOA4_HUMAN Apolipoprotein A-IV OS=Homo sapiens GN=APOA4 PE=1 SV=3	790	File384_Scan3805	controllerType=0 controllerNumber=1 scan=3805	17.853
01872:3	4	K.IDQTVEELRR.S			420.23	3	1258.67	1258.67	0	0	212	Specific	432.69	247.66	247.66	6.02	33	>sp|P06727|APOA4_HUMAN Apolipoprotein A-IV OS=Homo sapiens GN=APOA4 PE=1 SV=3	790	File384_Scan3616	controllerType=0 controllerNumber=1 scan=3616	17.4553
01755:3	4	K.IDQTVEELRR.S			420.229	3	1258.67	1258.67	0	-1.1	212	Specific	543.15	312.26	312.26	7.44	33	>sp|P06727|APOA4_HUMAN Apolipoprotein A-IV OS=Homo sapiens GN=APOA4 PE=1 SV=3	790	File384_Scan3493	controllerType=0 controllerNumber=1 scan=3493	17.2056
01761:2	4	K.IDQTVEELRR.S			629.841	2	1258.68	1258.67	0	0.1	212	Specific	734.01	355.43	355.43	10.68	33	>sp|P06727|APOA4_HUMAN Apolipoprotein A-IV OS=Homo sapiens GN=APOA4 PE=1 SV=3	790	File384_Scan3499	controllerType=0 controllerNumber=1 scan=3499	17.2156
02340:2	4	R.SLAPYAQDTQEK.L			675.831	2	1350.65	1350.65	0	0.5	222	Specific	408.23	243.02	243.02	8.1	33	>sp|P06727|APOA4_HUMAN Apolipoprotein A-IV OS=Homo sapiens GN=APOA4 PE=1 SV=3	790	File384_Scan4105	controllerType=0 controllerNumber=1 scan=4105	18.5737
02235:2	4	R.SLAPYAQDTQEK.L			675.831	2	1350.65	1350.65	0	0.1	222	Specific	612.17	349.6	349.6	11.15	33	>sp|P06727|APOA4_HUMAN Apolipoprotein A-IV OS=Homo sapiens GN=APOA4 PE=1 SV=3	790	File384_Scan3996	controllerType=0 controllerNumber=1 scan=3996	18.2929
04459:3	4	K.LNHQLEGLTFQM[+15.995]K.K		M[+16]	525.605	3	1574.8	1574.8	0	0.2	234	Specific	342.87	306.53	306.53	6.72	33	>sp|P06727|APOA4_HUMAN Apolipoprotein A-IV OS=Homo sapiens GN=APOA4 PE=1 SV=3	790	File384_Scan6522	controllerType=0 controllerNumber=1 scan=6522	24.1493
04382:2	4	K.LNHQLEGLTFQM[+15.995]K.K		M[+16]	787.904	2	1574.8	1574.8	0	0.4	234	Specific	394.82	318.91	318.91	6.36	33	>sp|P06727|APOA4_HUMAN Apolipoprotein A-IV OS=Homo sapiens GN=APOA4 PE=1 SV=3	790	File384_Scan6432	controllerType=0 controllerNumber=1 scan=6432	23.9172
04364:3	4	K.LNHQLEGLTFQM[+15.995]K.K		M[+16]	525.605	3	1574.8	1574.8	0	0.5	234	Specific	636.49	559.16	559.16	12.42	33	>sp|P06727|APOA4_HUMAN Apolipoprotein A-IV OS=Homo sapiens GN=APOA4 PE=1 SV=3	790	File384_Scan6411	controllerType=0 controllerNumber=1 scan=6411	23.8675
02013:2	4	R.ISASAEELR.Q			488.259	2	975.511	975.511	0	0.7	256	Specific	488.41	165.28	165.28	7.08	33	>sp|P06727|APOA4_HUMAN Apolipoprotein A-IV OS=Homo sapiens GN=APOA4 PE=1 SV=3	790	File384_Scan3764	controllerType=0 controllerNumber=1 scan=3764	17.7671
01912:2	4	R.ISASAEELR.Q			488.259	2	975.511	975.511	0	0.2	256	Specific	557.87	218.02	218.02	8.32	33	>sp|P06727|APOA4_HUMAN Apolipoprotein A-IV OS=Homo sapiens GN=APOA4 PE=1 SV=3	790	File384_Scan3658	controllerType=0 controllerNumber=1 scan=3658	17.5422
04305:2	4	R.LAPLAEDVR.G			492.28	2	983.552	983.552	0	0.3	267	Specific	264.03	107.82	107.82	3.21	33	>sp|P06727|APOA4_HUMAN Apolipoprotein A-IV OS=Homo sapiens GN=APOA4 PE=1 SV=3	790	File384_Scan6339	controllerType=0 controllerNumber=1 scan=6339	23.6783
04214:2	4	R.LAPLAEDVR.G			492.28	2	983.553	983.552	0	0.6	267	Specific	522.27	201.82	201.82	8.16	33	>sp|P06727|APOA4_HUMAN Apolipoprotein A-IV OS=Homo sapiens GN=APOA4 PE=1 SV=3	790	File384_Scan6216	controllerType=0 controllerNumber=1 scan=6216	23.3815
06756:3	4	K.SLAELGGHLDQQVEEFR.R			643.321	3	1927.95	1927.95	0	-1.1	288	Specific	613.27	510.17	510.17	12.21	33	>sp|P06727|APOA4_HUMAN Apolipoprotein A-IV OS=Homo sapiens GN=APOA4 PE=1 SV=3	790	File384_Scan8953	controllerType=0 controllerNumber=1 scan=8953	29.7855
06691:2	4	K.SLAELGGHLDQQVEEFR.R			964.476	2	1927.95	1927.95	0	-2.9	288	Specific	677.21	587.74	587.74	12.28	33	>sp|P06727|APOA4_HUMAN Apolipoprotein A-IV OS=Homo sapiens GN=APOA4 PE=1 SV=3	790	File384_Scan8885	controllerType=0 controllerNumber=1 scan=8885	29.6463
06654:2	4	K.SLAELGGHLDQQVEEFR.R			964.479	2	1927.95	1927.95	0	0.3	288	Specific	892.26	716.91	716.91	17.11	33	>sp|P06727|APOA4_HUMAN Apolipoprotein A-IV OS=Homo sapiens GN=APOA4 PE=1 SV=3	790	File384_Scan8846	controllerType=0 controllerNumber=1 scan=8846	29.5678
06641:3	4	K.SLAELGGHLDQQVEEFR.R			643.322	3	1927.95	1927.95	0	1.1	288	Specific	944.51	812.75	812.75	18.81	33	>sp|P06727|APOA4_HUMAN Apolipoprotein A-IV OS=Homo sapiens GN=APOA4 PE=1 SV=3	790	File384_Scan8833	controllerType=0 controllerNumber=1 scan=8833	29.545
06185:3	4	K.SLAELGGHLDQQVEEFRR.R			695.356	3	2084.05	2084.05	0	0.7	288	Specific	573.1	509.29	509.29	9.89	33	>sp|P06727|APOA4_HUMAN Apolipoprotein A-IV OS=Homo sapiens GN=APOA4 PE=1 SV=3	790	File384_Scan8355	controllerType=0 controllerNumber=1 scan=8355	28.5312
06049:3	4	K.SLAELGGHLDQQVEEFRR.R			695.356	3	2084.05	2084.05	0	1.3	288	Specific	699.73	555.82	555.82	13.14	33	>sp|P06727|APOA4_HUMAN Apolipoprotein A-IV OS=Homo sapiens GN=APOA4 PE=1 SV=3	790	File384_Scan8213	controllerType=0 controllerNumber=1 scan=8213	28.2274
05834:3	4	K.SLAELGGHLDQQVEEFRR.R			695.356	3	2084.05	2084.05	0	0.1	288	Specific	811.36	661.12	661.12	16	33	>sp|P06727|APOA4_HUMAN Apolipoprotein A-IV OS=Homo sapiens GN=APOA4 PE=1 SV=3	790	File384_Scan7989	controllerType=0 controllerNumber=1 scan=7989	27.7042
05938:3	4	K.SLAELGGHLDQQVEEFRR.R			695.356	3	2084.05	2084.05	0	0.6	288	Specific	844.48	650.87	650.87	16	33	>sp|P06727|APOA4_HUMAN Apolipoprotein A-IV OS=Homo sapiens GN=APOA4 PE=1 SV=3	790	File384_Scan8097	controllerType=0 controllerNumber=1 scan=8097	27.9663
01688:2	4	R.RVEPYGENFNK.A			676.833	2	1352.66	1352.66	0	0.3	306	Specific	412.72	231.72	231.72	5.39	33	>sp|P06727|APOA4_HUMAN Apolipoprotein A-IV OS=Homo sapiens GN=APOA4 PE=1 SV=3	790	File384_Scan3422	controllerType=0 controllerNumber=1 scan=3422	17.0562
01656:3	4	R.RVEPYGENFNK.A			451.558	3	1352.66	1352.66	0	0	306	Specific	548.2	406.3	406.3	10.15	33	>sp|P06727|APOA4_HUMAN Apolipoprotein A-IV OS=Homo sapiens GN=APOA4 PE=1 SV=3	790	File384_Scan3389	controllerType=0 controllerNumber=1 scan=3389	16.9928
01545:3	4	R.RVEPYGENFNK.A			451.558	3	1352.66	1352.66	0	0.3	306	Specific	572.89	420.96	420.96	10.31	33	>sp|P06727|APOA4_HUMAN Apolipoprotein A-IV OS=Homo sapiens GN=APOA4 PE=1 SV=3	790	File384_Scan3272	controllerType=0 controllerNumber=1 scan=3272	16.748
01554:2	4	R.RVEPYGENFNK.A			676.834	2	1352.66	1352.66	0	0.4	306	Specific	574.48	349.15	349.15	7.14	33	>sp|P06727|APOA4_HUMAN Apolipoprotein A-IV OS=Homo sapiens GN=APOA4 PE=1 SV=3	790	File384_Scan3282	controllerType=0 controllerNumber=1 scan=3282	16.7703
02589:2	4	R.VEPYGENFNK.A			598.782	2	1196.56	1196.56	0	-0.6	307	Specific	486.66	273.36	273.36	6.86	33	>sp|P06727|APOA4_HUMAN Apolipoprotein A-IV OS=Homo sapiens GN=APOA4 PE=1 SV=3	790	File384_Scan4365	controllerType=0 controllerNumber=1 scan=4365	19.145
02578:2	4	K.ALVQQM[+15.995]EQLR.Q		M[+16]	616.326	2	1231.64	1231.65	0	-2	317	Specific	296.52	181.63	181.63	4.86	33	>sp|P06727|APOA4_HUMAN Apolipoprotein A-IV OS=Homo sapiens GN=APOA4 PE=1 SV=3	790	File384_Scan4353	controllerType=0 controllerNumber=1 scan=4353	19.1143
02381:2	4	K.ALVQQM[+15.995]EQLR.Q		M[+16]	616.327	2	1231.65	1231.65	0	1.2	317	Specific	499.23	269.49	269.49	8.28	33	>sp|P06727|APOA4_HUMAN Apolipoprotein A-IV OS=Homo sapiens GN=APOA4 PE=1 SV=3	790	File384_Scan4148	controllerType=0 controllerNumber=1 scan=4148	18.6713
02285:2	4	K.ALVQQM[+15.995]EQLR.Q		M[+16]	616.326	2	1231.64	1231.65	0	-1.3	317	Specific	526.63	274.95	274.95	7.92	33	>sp|P06727|APOA4_HUMAN Apolipoprotein A-IV OS=Homo sapiens GN=APOA4 PE=1 SV=3	790	File384_Scan4048	controllerType=0 controllerNumber=1 scan=4048	18.4312
05521:4	4	K.LGPHAGDVEGHLSFLEK.D			452.235	4	1805.92	1805.92	0	-1.1	329	Specific	536.57	481.35	481.35	9.78	33	>sp|P06727|APOA4_HUMAN Apolipoprotein A-IV OS=Homo sapiens GN=APOA4 PE=1 SV=3	790	File384_Scan7648	controllerType=0 controllerNumber=1 scan=7648	26.8798
05401:4	4	K.LGPHAGDVEGHLSFLEK.D			452.235	4	1805.92	1805.92	0	0.2	329	Specific	575.15	460.35	460.35	9.66	33	>sp|P06727|APOA4_HUMAN Apolipoprotein A-IV OS=Homo sapiens GN=APOA4 PE=1 SV=3	790	File384_Scan7521	controllerType=0 controllerNumber=1 scan=7521	26.5934
05536:3	4	K.LGPHAGDVEGHLSFLEK.D			602.645	3	1805.92	1805.92	0	1.4	329	Specific	610.74	516.6	516.6	12.25	33	>sp|P06727|APOA4_HUMAN Apolipoprotein A-IV OS=Homo sapiens GN=APOA4 PE=1 SV=3	790	File384_Scan7665	controllerType=0 controllerNumber=1 scan=7665	26.9168
05400:3	4	K.LGPHAGDVEGHLSFLEK.D			602.645	3	1805.92	1805.92	0	0.6	329	Specific	736.82	628.97	628.97	14.11	33	>sp|P06727|APOA4_HUMAN Apolipoprotein A-IV OS=Homo sapiens GN=APOA4 PE=1 SV=3	790	File384_Scan7520	controllerType=0 controllerNumber=1 scan=7520	26.5919
05295:4	4	K.LGPHAGDVEGHLSFLEK.D			452.235	4	1805.92	1805.92	0	0.4	329	Specific	739.21	602.49	602.49	14.67	33	>sp|P06727|APOA4_HUMAN Apolipoprotein A-IV OS=Homo sapiens GN=APOA4 PE=1 SV=3	790	File384_Scan7410	controllerType=0 controllerNumber=1 scan=7410	26.3384
05294:3	4	K.LGPHAGDVEGHLSFLEK.D			602.644	3	1805.92	1805.92	0	0.5	329	Specific	952.76	806.33	806.33	19.11	33	>sp|P06727|APOA4_HUMAN Apolipoprotein A-IV OS=Homo sapiens GN=APOA4 PE=1 SV=3	790	File384_Scan7409	controllerType=0 controllerNumber=1 scan=7409	26.3369
06830:3	4	R.DKVNSFFSTFK.E			440.559	3	1319.66	1319.66	0	-0.3	349	Specific	391.32	340.91	340.91	6.06	33	>sp|P06727|APOA4_HUMAN Apolipoprotein A-IV OS=Homo sapiens GN=APOA4 PE=1 SV=3	790	File384_Scan9031	controllerType=0 controllerNumber=1 scan=9031	29.9389
06995:2	4	R.DKVNSFFSTFK.E			660.336	2	1319.66	1319.66	0	0.7	349	Specific	430.45	283.98	283.98	5.78	33	>sp|P06727|APOA4_HUMAN Apolipoprotein A-IV OS=Homo sapiens GN=APOA4 PE=1 SV=3	790	File384_Scan9204	controllerType=0 controllerNumber=1 scan=9204	30.2943
06885:2	4	R.DKVNSFFSTFK.E			660.335	2	1319.66	1319.66	0	0.4	349	Specific	520.55	392.74	392.74	8.08	33	>sp|P06727|APOA4_HUMAN Apolipoprotein A-IV OS=Homo sapiens GN=APOA4 PE=1 SV=3	790	File384_Scan9089	controllerType=0 controllerNumber=1 scan=9089	30.0628
06786:2	4	R.DKVNSFFSTFK.E			660.336	2	1319.66	1319.66	0	0.7	349	Specific	640.11	417.16	417.16	10.51	33	>sp|P06727|APOA4_HUMAN Apolipoprotein A-IV OS=Homo sapiens GN=APOA4 PE=1 SV=3	790	File384_Scan8985	controllerType=0 controllerNumber=1 scan=8985	29.8498
07452:2	4	K.VNSFFSTFK.E			538.774	2	1076.54	1076.54	0	0.4	351	Specific	438.69	172.92	172.92	6.34	33	>sp|P06727|APOA4_HUMAN Apolipoprotein A-IV OS=Homo sapiens GN=APOA4 PE=1 SV=3	790	File384_Scan9685	controllerType=0 controllerNumber=1 scan=9685	31.2984
09548:3	4	K.TLSLPELEQQQEQQQEQQQEQVQM[+15.995]LAPLES.-		M[+16]	1185.24	3	3553.7	3553.7	0	1.1	367	CRagged	233.13	233.13	233.13	6.19	33	>sp|P06727|APOA4_HUMAN Apolipoprotein A-IV OS=Homo sapiens GN=APOA4 PE=1 SV=3	790	File384_Scan11894	controllerType=0 controllerNumber=1 scan=11894	35.8489
06945:2	5	K.GLIDEVNQDFTNR.I			760.871	2	1520.73	1520.73	0	0.7	72	Specific	629.39	489.96	489.96	12.42	23	>sp|P02671|FIBA_HUMAN Fibrinogen alpha chain OS=Homo sapiens GN=FGA PE=1 SV=2	6049	File384_Scan9152	controllerType=0 controllerNumber=1 scan=9152	30.1888
06847:2	5	K.GLIDEVNQDFTNR.I			760.871	2	1520.73	1520.73	0	0.5	72	Specific	673.55	504.19	504.19	13.42	23	>sp|P02671|FIBA_HUMAN Fibrinogen alpha chain OS=Homo sapiens GN=FGA PE=1 SV=2	6049	File384_Scan9049	controllerType=0 controllerNumber=1 scan=9049	29.9779
04298:2	5	K.NSLFEYQK.N			514.756	2	1028.51	1028.5	0	0.5	90	Specific	571.48	294.51	294.51	7.57	23	>sp|P02671|FIBA_HUMAN Fibrinogen alpha chain OS=Homo sapiens GN=FGA PE=1 SV=2	6049	File384_Scan6320	controllerType=0 controllerNumber=1 scan=6320	23.63
08215:3	5	K.DSHSLTTNIM[+15.995]EILR.G		M[+16]	549.279	3	1645.82	1645.82	0	0	101	Specific	451.01	332.08	332.08	7.9	23	>sp|P02671|FIBA_HUMAN Fibrinogen alpha chain OS=Homo sapiens GN=FGA PE=1 SV=2	6049	File384_Scan10485	controllerType=0 controllerNumber=1 scan=10485	32.9354
08038:3	5	K.DSHSLTTNIM[+15.995]EILR.G		M[+16]	549.279	3	1645.82	1645.82	0	0.6	101	Specific	601.03	460.87	460.87	12.42	23	>sp|P02671|FIBA_HUMAN Fibrinogen alpha chain OS=Homo sapiens GN=FGA PE=1 SV=2	6049	File384_Scan10300	controllerType=0 controllerNumber=1 scan=10300	32.5572
07936:2	5	K.DSHSLTTNIM[+15.995]EILR.G		M[+16]	823.415	2	1645.82	1645.82	0	1.1	101	Specific	642.67	480.25	480.25	12	23	>sp|P02671|FIBA_HUMAN Fibrinogen alpha chain OS=Homo sapiens GN=FGA PE=1 SV=2	6049	File384_Scan10193	controllerType=0 controllerNumber=1 scan=10193	32.3401
07933:3	5	K.DSHSLTTNIM[+15.995]EILR.G		M[+16]	549.279	3	1645.82	1645.82	0	0.3	101	Specific	716.98	561.68	561.68	14.42	23	>sp|P02671|FIBA_HUMAN Fibrinogen alpha chain OS=Homo sapiens GN=FGA PE=1 SV=2	6049	File384_Scan10190	controllerType=0 controllerNumber=1 scan=10190	32.3355
01560:2	5	R.SRIEVLK.R			422.766	2	844.525	844.525	0	-0.2	136	Specific	515.22	107.56	107.56	4.04	23	>sp|P02671|FIBA_HUMAN Fibrinogen alpha chain OS=Homo sapiens GN=FGA PE=1 SV=2	6049	File384_Scan3288	controllerType=0 controllerNumber=1 scan=3288	16.7809
03032:2	5	K.VQHIQLLQK.N			553.838	2	1106.67	1106.67	0	0.5	149	Specific	752.24	484.23	484.23	14.91	23	>sp|P02671|FIBA_HUMAN Fibrinogen alpha chain OS=Homo sapiens GN=FGA PE=1 SV=2	6049	File384_Scan4828	controllerType=0 controllerNumber=1 scan=4828	20.2164
02627:3	5	R.EVDLKDYEDQQK.Q			503.907	3	1509.71	1509.71	0	0	191	Specific	596.9	457.84	457.84	10.72	23	>sp|P02671|FIBA_HUMAN Fibrinogen alpha chain OS=Homo sapiens GN=FGA PE=1 SV=2	6049	File384_Scan4405	controllerType=0 controllerNumber=1 scan=4405	19.2195
02517:3	5	R.EVDLKDYEDQQK.Q			503.906	3	1509.7	1509.71	0	-2	191	Specific	653.73	502.42	502.42	12.11	23	>sp|P02671|FIBA_HUMAN Fibrinogen alpha chain OS=Homo sapiens GN=FGA PE=1 SV=2	6049	File384_Scan4290	controllerType=0 controllerNumber=1 scan=4290	18.9831
02524:2	5	R.EVDLKDYEDQQK.Q			755.356	2	1509.7	1509.71	0	-2	191	Specific	863.88	634.35	634.35	15.55	23	>sp|P02671|FIBA_HUMAN Fibrinogen alpha chain OS=Homo sapiens GN=FGA PE=1 SV=2	6049	File384_Scan4297	controllerType=0 controllerNumber=1 scan=4297	18.9972
02783:2	5	K.QLEQVIAK.D			464.777	2	928.546	928.546	0	-0.2	203	Specific	319.84	58.52	58.52	2.98	23	>sp|P02671|FIBA_HUMAN Fibrinogen alpha chain OS=Homo sapiens GN=FGA PE=1 SV=2	6049	File384_Scan4568	controllerType=0 controllerNumber=1 scan=4568	19.615
02659:2	5	K.QLEQVIAK.D			464.776	2	928.545	928.546	0	-1.7	203	Specific	597.83	119.48	119.48	7.79	23	>sp|P02671|FIBA_HUMAN Fibrinogen alpha chain OS=Homo sapiens GN=FGA PE=1 SV=2	6049	File384_Scan4439	controllerType=0 controllerNumber=1 scan=4439	19.2969
03295:2	5	R.QHLPLIK.M			424.772	2	848.536	848.535	0	0.5	219	Specific	341.29	194.71	194.71	5.01	23	>sp|P02671|FIBA_HUMAN Fibrinogen alpha chain OS=Homo sapiens GN=FGA PE=1 SV=2	6049	File384_Scan5103	controllerType=0 controllerNumber=1 scan=5103	20.8121
03191:2	5	R.QHLPLIK.M			424.771	2	848.534	848.535	0	-1.7	219	Specific	452.04	189.58	189.58	6.05	23	>sp|P02671|FIBA_HUMAN Fibrinogen alpha chain OS=Homo sapiens GN=FGA PE=1 SV=2	6049	File384_Scan4994	controllerType=0 controllerNumber=1 scan=4994	20.5846
05308:3	5	K.M[+15.995]KPVPDLVPGNFK.S		M[+16]	486.599	3	1457.78	1457.78	0	0.4	226	Specific	339.58	287.18	287.18	6.53	23	>sp|P02671|FIBA_HUMAN Fibrinogen alpha chain OS=Homo sapiens GN=FGA PE=1 SV=2	6049	File384_Scan7424	controllerType=0 controllerNumber=1 scan=7424	26.3667
05204:3	5	K.M[+15.995]KPVPDLVPGNFK.S		M[+16]	486.599	3	1457.78	1457.78	0	0.2	226	Specific	463.64	398.11	398.11	9.71	23	>sp|P02671|FIBA_HUMAN Fibrinogen alpha chain OS=Homo sapiens GN=FGA PE=1 SV=2	6049	File384_Scan7316	controllerType=0 controllerNumber=1 scan=7316	26.1048
05213:2	5	K.M[+15.995]KPVPDLVPGNFK.S		M[+16]	729.395	2	1457.78	1457.78	0	1	226	Specific	640.91	487.66	487.66	11.86	23	>sp|P02671|FIBA_HUMAN Fibrinogen alpha chain OS=Homo sapiens GN=FGA PE=1 SV=2	6049	File384_Scan7325	controllerType=0 controllerNumber=1 scan=7325	26.1315
00887:2	5	K.ALTDM[+15.995]PQM[+15.995]R.M		M[+16]*2	547.753	2	1094.5	1094.5	0	0.8	250	Specific	195.25	27.6	27.6	1.79	23	>sp|P02671|FIBA_HUMAN Fibrinogen alpha chain OS=Homo sapiens GN=FGA PE=1 SV=2	6049	File384_Scan2581	controllerType=0 controllerNumber=1 scan=2581	15.312
00772:2	5	K.ALTDM[+15.995]PQM[+15.995]R.M		M[+16]*2	547.752	2	1094.5	1094.5	0	-0.4	250	Specific	432.07	247.14	247.14	7.58	23	>sp|P02671|FIBA_HUMAN Fibrinogen alpha chain OS=Homo sapiens GN=FGA PE=1 SV=2	6049	File384_Scan2461	controllerType=0 controllerNumber=1 scan=2461	15.056
01622:3	5	R.M[+15.995]ELERPGGNEITR.G		M[+16]	506.584	3	1517.74	1517.74	0	-0.2	259	Specific	342.38	278.64	278.64	6.2	23	>sp|P02671|FIBA_HUMAN Fibrinogen alpha chain OS=Homo sapiens GN=FGA PE=1 SV=2	6049	File384_Scan3353	controllerType=0 controllerNumber=1 scan=3353	16.9142
01345:3	5	R.M[+15.995]ELERPGGNEITR.G		M[+16]	506.584	3	1517.74	1517.74	0	-0.2	259	Specific	524.81	451.26	451.26	9.76	23	>sp|P02671|FIBA_HUMAN Fibrinogen alpha chain OS=Homo sapiens GN=FGA PE=1 SV=2	6049	File384_Scan3061	controllerType=0 controllerNumber=1 scan=3061	16.3277
01245:3	5	R.M[+15.995]ELERPGGNEITR.G		M[+16]	506.584	3	1517.74	1517.74	0	0.3	259	Specific	552.51	499.09	499.09	10.14	23	>sp|P02671|FIBA_HUMAN Fibrinogen alpha chain OS=Homo sapiens GN=FGA PE=1 SV=2	6049	File384_Scan2956	controllerType=0 controllerNumber=1 scan=2956	16.1187
01262:2	5	R.M[+15.995]ELERPGGNEITR.G		M[+16]	759.373	2	1517.74	1517.74	0	0.4	259	Specific	586.17	385.12	385.12	9.81	23	>sp|P02671|FIBA_HUMAN Fibrinogen alpha chain OS=Homo sapiens GN=FGA PE=1 SV=2	6049	File384_Scan2974	controllerType=0 controllerNumber=1 scan=2974	16.1501
00683:2	5	R.GGSTSYGTGSETESPR.N			786.843	2	1572.68	1572.68	0	0.5	272	Specific	642.97	520.41	520.41	12.67	23	>sp|P02671|FIBA_HUMAN Fibrinogen alpha chain OS=Homo sapiens GN=FGA PE=1 SV=2	6049	File384_Scan2368	controllerType=0 controllerNumber=1 scan=2368	14.8414
01300:2	5	R.NPSSAGSWNSGSSGPGSTGNR.N			982.429	2	1963.85	1963.85	0	0.8	288	Specific	712.55	712.55	712.55	15.27	23	>sp|P02671|FIBA_HUMAN Fibrinogen alpha chain OS=Homo sapiens GN=FGA PE=1 SV=2	6049	File384_Scan3013	controllerType=0 controllerNumber=1 scan=3013	16.2296
01877:2	5	R.PGSTGTWNPGSSER.G			716.827	2	1432.65	1432.65	0	0.9	354	Specific	830.23	768.12	768.12	16.42	23	>sp|P02671|FIBA_HUMAN Fibrinogen alpha chain OS=Homo sapiens GN=FGA PE=1 SV=2	6049	File384_Scan3621	controllerType=0 controllerNumber=1 scan=3621	17.4637
06876:3	5	R.PNNPDWGTFEEVSGNVSPGTR.R			754.014	3	2260.03	2260.03	0	0.4	405	Specific	324.39	324.39	324.39	7.4	23	>sp|P02671|FIBA_HUMAN Fibrinogen alpha chain OS=Homo sapiens GN=FGA PE=1 SV=2	6049	File384_Scan9079	controllerType=0 controllerNumber=1 scan=9079	30.0387
06854:2	5	R.PNNPDWGTFEEVSGNVSPGTR.R			1130.52	2	2260.03	2260.03	0	1.4	405	Specific	619.99	619.99	619.99	13.41	23	>sp|P02671|FIBA_HUMAN Fibrinogen alpha chain OS=Homo sapiens GN=FGA PE=1 SV=2	6049	File384_Scan9056	controllerType=0 controllerNumber=1 scan=9056	29.9914
00672:2	5	K.TVIGPDGHK.E			462.251	2	923.494	923.495	0	-0.6	468	Specific	308.63	156.85	156.85	4.53	23	>sp|P02671|FIBA_HUMAN Fibrinogen alpha chain OS=Homo sapiens GN=FGA PE=1 SV=2	6049	File384_Scan2356	controllerType=0 controllerNumber=1 scan=2356	14.8138
00552:2	5	K.TVIGPDGHK.E			462.251	2	923.495	923.495	0	0	468	Specific	503.91	225.15	225.15	6.47	23	>sp|P02671|FIBA_HUMAN Fibrinogen alpha chain OS=Homo sapiens GN=FGA PE=1 SV=2	6049	File384_Scan2232	controllerType=0 controllerNumber=1 scan=2232	14.5224
10121:3	5	K.EVVTSEDGSDC[+57.021]PEAM[+15.995]DLGTLSGIGTLDGFR.H		C[+57], M[+16]	1048.81	3	3144.4	3144.4	0	1.4	481	Specific	179.25	179.25	179.25	6.59	23	>sp|P02671|FIBA_HUMAN Fibrinogen alpha chain OS=Homo sapiens GN=FGA PE=1 SV=2	6049	File384_Scan12502	controllerType=0 controllerNumber=1 scan=12502	37.1207
10049:2	5	K.EVVTSEDGSDC[+57.021]PEAM[+15.995]DLGTLSGIGTLDGFR.H		C[+57], M[+16]	1572.7	2	3144.4	3144.4	0	1.3	481	Specific	267.61	267.61	267.61	8.3	23	>sp|P02671|FIBA_HUMAN Fibrinogen alpha chain OS=Homo sapiens GN=FGA PE=1 SV=2	6049	File384_Scan12426	controllerType=0 controllerNumber=1 scan=12426	36.966
10007:3	5	K.EVVTSEDGSDC[+57.021]PEAM[+15.995]DLGTLSGIGTLDGFR.H		C[+57], M[+16]	1048.81	3	3144.41	3144.4	0	2.8	481	Specific	628.92	628.92	628.92	13.14	23	>sp|P02671|FIBA_HUMAN Fibrinogen alpha chain OS=Homo sapiens GN=FGA PE=1 SV=2	6049	File384_Scan12382	controllerType=0 controllerNumber=1 scan=12382	36.8767
04301:3	5	R.HPDEAAFFDTASTGK.T			531.911	3	1593.72	1593.72	0	0.3	513	Specific	637.81	573.76	573.76	12.4	23	>sp|P02671|FIBA_HUMAN Fibrinogen alpha chain OS=Homo sapiens GN=FGA PE=1 SV=2	6049	File384_Scan6328	controllerType=0 controllerNumber=1 scan=6328	23.6491
04300:2	5	R.HPDEAAFFDTASTGK.T			797.363	2	1593.72	1593.72	0	0.6	513	Specific	798.02	668.88	668.88	14.84	23	>sp|P02671|FIBA_HUMAN Fibrinogen alpha chain OS=Homo sapiens GN=FGA PE=1 SV=2	6049	File384_Scan6326	controllerType=0 controllerNumber=1 scan=6326	23.646
12170:3	5	K.TFPGFFSPM[+15.995]LGEFVSETESR.G		M[+16]	761.021	3	2281.05	2281.05	0	0.6	528	Specific	134.94	134.94	134.94	4.67	23	>sp|P02671|FIBA_HUMAN Fibrinogen alpha chain OS=Homo sapiens GN=FGA PE=1 SV=2	6049	File384_Scan14784	controllerType=0 controllerNumber=1 scan=14784	42.1196
12131:2	5	K.TFPGFFSPM[+15.995]LGEFVSETESR.G		M[+16]	1141.03	2	2281.05	2281.05	0	0.4	528	Specific	218.49	218.49	218.49	5.5	23	>sp|P02671|FIBA_HUMAN Fibrinogen alpha chain OS=Homo sapiens GN=FGA PE=1 SV=2	6049	File384_Scan14734	controllerType=0 controllerNumber=1 scan=14734	42.0077
12077:3	5	K.TFPGFFSPM[+15.995]LGEFVSETESR.G		M[+16]	761.022	3	2281.05	2281.05	0	1.7	528	Specific	294.11	294.11	294.11	7.67	23	>sp|P02671|FIBA_HUMAN Fibrinogen alpha chain OS=Homo sapiens GN=FGA PE=1 SV=2	6049	File384_Scan14661	controllerType=0 controllerNumber=1 scan=14661	41.852
03007:2	5	R.GSESGIFTNTK.E			570.78	2	1140.55	1140.55	0	0.5	548	Specific	496.74	357.18	357.18	7.62	23	>sp|P02671|FIBA_HUMAN Fibrinogen alpha chain OS=Homo sapiens GN=FGA PE=1 SV=2	6049	File384_Scan4802	controllerType=0 controllerNumber=1 scan=4802	20.1543
02903:2	5	R.GSESGIFTNTK.E			570.78	2	1140.55	1140.55	0	0.3	548	Specific	669.73	460.78	460.78	13.42	23	>sp|P02671|FIBA_HUMAN Fibrinogen alpha chain OS=Homo sapiens GN=FGA PE=1 SV=2	6049	File384_Scan4693	controllerType=0 controllerNumber=1 scan=4693	19.9026
02445:4	5	K.ESSSHHPGIAEFPSR.G			410.198	4	1637.77	1637.77	0	1.8	559	Specific	303.76	201.8	201.8	5.17	23	>sp|P02671|FIBA_HUMAN Fibrinogen alpha chain OS=Homo sapiens GN=FGA PE=1 SV=2	6049	File384_Scan4214	controllerType=0 controllerNumber=1 scan=4214	18.827
02698:3	5	K.ESSSHHPGIAEFPSR.G			546.593	3	1637.76	1637.77	0	-1.9	559	Specific	495.93	495.93	495.93	8.72	23	>sp|P02671|FIBA_HUMAN Fibrinogen alpha chain OS=Homo sapiens GN=FGA PE=1 SV=2	6049	File384_Scan4479	controllerType=0 controllerNumber=1 scan=4479	19.3955
02160:3	5	K.ESSSHHPGIAEFPSR.G			546.594	3	1637.77	1637.77	0	1	559	Specific	544.64	544.64	544.64	9.71	23	>sp|P02671|FIBA_HUMAN Fibrinogen alpha chain OS=Homo sapiens GN=FGA PE=1 SV=2	6049	File384_Scan3917	controllerType=0 controllerNumber=1 scan=3917	18.0984
02558:3	5	K.ESSSHHPGIAEFPSR.G			546.592	3	1637.76	1637.77	0	-2.8	559	Specific	553.42	464.5	464.5	8.73	23	>sp|P02671|FIBA_HUMAN Fibrinogen alpha chain OS=Homo sapiens GN=FGA PE=1 SV=2	6049	File384_Scan4332	controllerType=0 controllerNumber=1 scan=4332	19.0708
02291:3	5	K.ESSSHHPGIAEFPSR.G			546.593	3	1637.76	1637.77	0	-1.8	559	Specific	554.82	481.49	481.49	9.11	23	>sp|P02671|FIBA_HUMAN Fibrinogen alpha chain OS=Homo sapiens GN=FGA PE=1 SV=2	6049	File384_Scan4054	controllerType=0 controllerNumber=1 scan=4054	18.4409
03002:3	5	K.ESSSHHPGIAEFPSR.G			546.594	3	1637.77	1637.77	0	0.4	559	Specific	580.36	580.36	580.36	10.84	23	>sp|P02671|FIBA_HUMAN Fibrinogen alpha chain OS=Homo sapiens GN=FGA PE=1 SV=2	6049	File384_Scan4796	controllerType=0 controllerNumber=1 scan=4796	20.1399
02887:3	5	K.ESSSHHPGIAEFPSR.G			546.594	3	1637.77	1637.77	0	0.9	559	Specific	631.86	623.99	623.99	11.84	23	>sp|P02671|FIBA_HUMAN Fibrinogen alpha chain OS=Homo sapiens GN=FGA PE=1 SV=2	6049	File384_Scan4676	controllerType=0 controllerNumber=1 scan=4676	19.8617
02397:3	5	K.ESSSHHPGIAEFPSR.G			546.594	3	1637.77	1637.77	0	0.4	559	Specific	721.87	721.87	721.87	13.84	23	>sp|P02671|FIBA_HUMAN Fibrinogen alpha chain OS=Homo sapiens GN=FGA PE=1 SV=2	6049	File384_Scan4164	controllerType=0 controllerNumber=1 scan=4164	18.7078
01091:2	5	K.QFTSSTSYNR.G			595.776	2	1190.54	1190.54	0	0.8	582	Specific	661.61	453.82	453.82	13.47	23	>sp|P02671|FIBA_HUMAN Fibrinogen alpha chain OS=Homo sapiens GN=FGA PE=1 SV=2	6049	File384_Scan2795	controllerType=0 controllerNumber=1 scan=2795	15.7778
00248:3	5	K.M[+15.995]ADEAGSEADHEGTHSTK.R		M[+16]	630.259	3	1888.76	1888.76	0	0.5	603	Specific	25.65	25.65	25.65	1.8	23	>sp|P02671|FIBA_HUMAN Fibrinogen alpha chain OS=Homo sapiens GN=FGA PE=1 SV=2	6049	File384_Scan1915	controllerType=0 controllerNumber=1 scan=1915	13.7882
00125:3	5	K.M[+15.995]ADEAGSEADHEGTHSTK.R		M[+16]	630.259	3	1888.76	1888.76	0	1	603	Specific	101.45	101.45	101.45	3.58	23	>sp|P02671|FIBA_HUMAN Fibrinogen alpha chain OS=Homo sapiens GN=FGA PE=1 SV=2	6049	File384_Scan1786	controllerType=0 controllerNumber=1 scan=1786	13.4914
00030:4	5	K.M[+15.995]ADEAGSEADHEGTHSTK.R		M[+16]	472.945	4	1888.76	1888.76	0	-2.6	603	Specific	118.64	118.64	118.64	2.98	23	>sp|P02671|FIBA_HUMAN Fibrinogen alpha chain OS=Homo sapiens GN=FGA PE=1 SV=2	6049	File384_Scan1686	controllerType=0 controllerNumber=1 scan=1686	13.2637
00020:3	5	K.M[+15.995]ADEAGSEADHEGTHSTK.R		M[+16]	630.257	3	1888.76	1888.76	0	-1.9	603	Specific	338.94	338.94	338.94	7.42	23	>sp|P02671|FIBA_HUMAN Fibrinogen alpha chain OS=Homo sapiens GN=FGA PE=1 SV=2	6049	File384_Scan1676	controllerType=0 controllerNumber=1 scan=1676	13.2458
03494:2	6	R.DNC[+57.021]C[+57.021]ILDER.F		C[+57]*2	597.748	2	1194.49	1194.49	0	0.9	32	Specific	483.58	332.04	332.04	8.32	23	>sp|P02679|FIBG_HUMAN Fibrinogen gamma chain OS=Homo sapiens GN=FGG PE=1 SV=3	6388	File384_Scan5311	controllerType=0 controllerNumber=1 scan=5311	21.2655
10629:2	6	R.FGSYC[+57.021]PTTC[+57.021]GIADFLSTYQTK.V		C[+57]*2	1209.05	2	2417.09	2417.08	0	3.3	41	Specific	210.47	210.47	210.47	4.47	23	>sp|P02679|FIBG_HUMAN Fibrinogen gamma chain OS=Homo sapiens GN=FGG PE=1 SV=3	6388	File384_Scan13041	controllerType=0 controllerNumber=1 scan=13041	38.211
10632:3	6	R.FGSYC[+57.021]PTTC[+57.021]GIADFLSTYQTK.V		C[+57]*2	806.364	3	2417.08	2417.08	0	-1	41	Specific	371.51	371.51	371.51	8.71	23	>sp|P02679|FIBG_HUMAN Fibrinogen gamma chain OS=Homo sapiens GN=FGG PE=1 SV=3	6388	File384_Scan13044	controllerType=0 controllerNumber=1 scan=13044	38.2163
09131:4	6	K.VDKDLQSLEDILHQVEN[+1913.677]K.T	HexNAc(4)Hex(5)NeuAc(1)	N[+1914]	1009.95	4	4036.78	4036.77	0	1.1	62	Specific	143.07	38.47	38.47	2.23	23	>sp|P02679|FIBG_HUMAN Fibrinogen gamma chain OS=Homo sapiens GN=FGG PE=1 SV=3	6388	File384_Scan11456	controllerType=0 controllerNumber=1 scan=11456	34.9066
09790:4	6	K.VDKDLQSLEDILHQVEN[+2204.772]K.T	HexNAc(4)Hex(5)NeuAc(2)	N[+2205]	1082.72	4	4327.88	4327.87	0	1.1	62	Specific	189.08	189.08	12.39	5.59	23	>sp|P02679|FIBG_HUMAN Fibrinogen gamma chain OS=Homo sapiens GN=FGG PE=1 SV=3	6388	File384_Scan12151	controllerType=0 controllerNumber=1 scan=12151	36.378
09792:4	6	K.VDKDLQSLEDILHQVEN[+2204.772]K.T	HexNAc(4)Hex(5)NeuAc(2)	N[+2205]	1082.72	4	4327.88	4327.87	0	1.1	62	Specific	387.8	260.5	24.06	8.06	23	>sp|P02679|FIBG_HUMAN Fibrinogen gamma chain OS=Homo sapiens GN=FGG PE=1 SV=3	6388	File384_Scan12153	controllerType=0 controllerNumber=1 scan=12153	36.3823
09177:3	6	K.VDKDLQSLEDILHQVEN[+1913.677]K.T	HexNAc(4)Hex(5)NeuAc(1)	N[+1914]	1346.26	3	4036.77	4036.77	0	-0.3	62	Specific	438.31	330.54	51.09	7.37	23	>sp|P02679|FIBG_HUMAN Fibrinogen gamma chain OS=Homo sapiens GN=FGG PE=1 SV=3	6388	File384_Scan11505	controllerType=0 controllerNumber=1 scan=11505	35.0105
09238:4	6	K.VDKDLQSLEDILHQVEN[+1913.677]K.T	HexNAc(4)Hex(5)NeuAc(1)	N[+1914]	1009.95	4	4036.77	4036.77	0	-0.1	62	Specific	505.02	280.26	65.54	8.17	23	>sp|P02679|FIBG_HUMAN Fibrinogen gamma chain OS=Homo sapiens GN=FGG PE=1 SV=3	6388	File384_Scan11569	controllerType=0 controllerNumber=1 scan=11569	35.1475
09179:3	6	K.VDKDLQSLEDILHQVEN[+1913.677]K.T	HexNAc(4)Hex(5)NeuAc(1)	N[+1914]	1346.26	3	4036.77	4036.77	0	-0.3	62	Specific	551.22	314.76	115.05	7.86	23	>sp|P02679|FIBG_HUMAN Fibrinogen gamma chain OS=Homo sapiens GN=FGG PE=1 SV=3	6388	File384_Scan11507	controllerType=0 controllerNumber=1 scan=11507	35.0143
09236:4	6	K.VDKDLQSLEDILHQVEN[+1913.677]K.T	HexNAc(4)Hex(5)NeuAc(1)	N[+1914]	1009.95	4	4036.77	4036.77	0	-0.1	62	Specific	561.67	372.83	53.77	8.97	23	>sp|P02679|FIBG_HUMAN Fibrinogen gamma chain OS=Homo sapiens GN=FGG PE=1 SV=3	6388	File384_Scan11567	controllerType=0 controllerNumber=1 scan=11567	35.1427
05370:3	6	K.AIQLTYNPDESSKPNM[+15.995]IDAATLK.S		M[+16]	846.093	3	2536.26	2536.26	0	1.4	89	Specific	796.08	751.95	751.95	16.12	23	>sp|P02679|FIBG_HUMAN Fibrinogen gamma chain OS=Homo sapiens GN=FGG PE=1 SV=3	6388	File384_Scan7489	controllerType=0 controllerNumber=1 scan=7489	26.5219
00643:2	6	R.KM[+15.995]LEEIM[+15.995]K.Y		M[+16]*2	527.271	2	1053.53	1053.53	0	2.6	114	Specific	522.46	253.83	253.83	5.79	23	>sp|P02679|FIBG_HUMAN Fibrinogen gamma chain OS=Homo sapiens GN=FGG PE=1 SV=3	6388	File384_Scan2326	controllerType=0 controllerNumber=1 scan=2326	14.7515
04015:3	6	K.YEASILTHDSSIR.Y			497.92	3	1491.74	1491.74	0	0.1	122	Specific	705.4	539.7	539.7	14.42	23	>sp|P02679|FIBG_HUMAN Fibrinogen gamma chain OS=Homo sapiens GN=FGG PE=1 SV=3	6388	File384_Scan5938	controllerType=0 controllerNumber=1 scan=5938	22.6758
03929:3	6	K.YEASILTHDSSIR.Y			497.92	3	1491.74	1491.74	0	0.3	122	Specific	807.61	620.18	620.18	16.42	23	>sp|P02679|FIBG_HUMAN Fibrinogen gamma chain OS=Homo sapiens GN=FGG PE=1 SV=3	6388	File384_Scan5836	controllerType=0 controllerNumber=1 scan=5836	22.4422
03935:2	6	K.YEASILTHDSSIR.Y			746.376	2	1491.74	1491.74	0	0.8	122	Specific	880.16	599.75	599.75	16.86	23	>sp|P02679|FIBG_HUMAN Fibrinogen gamma chain OS=Homo sapiens GN=FGG PE=1 SV=3	6388	File384_Scan5842	controllerType=0 controllerNumber=1 scan=5842	22.4549
03425:2	6	R.YLQEIYNSNNQK.I			757.368	2	1513.73	1513.73	0	0.5	135	Specific	535.42	473.11	473.11	10.17	23	>sp|P02679|FIBG_HUMAN Fibrinogen gamma chain OS=Homo sapiens GN=FGG PE=1 SV=3	6388	File384_Scan5239	controllerType=0 controllerNumber=1 scan=5239	21.1022
03319:2	6	R.YLQEIYNSNNQK.I			757.369	2	1513.73	1513.73	0	1.3	135	Specific	657.02	519.32	519.32	13.75	23	>sp|P02679|FIBG_HUMAN Fibrinogen gamma chain OS=Homo sapiens GN=FGG PE=1 SV=3	6388	File384_Scan5128	controllerType=0 controllerNumber=1 scan=5128	20.8606
03943:3	6	K.VAQLEAQC[+57.021]QEPC[+57.021]KDTVQIHDITGK.D		C[+57]*2	923.45	3	2768.33	2768.33	0	0.3	154	Specific	70.94	70.94	70.94	2.21	23	>sp|P02679|FIBG_HUMAN Fibrinogen gamma chain OS=Homo sapiens GN=FGG PE=1 SV=3	6388	File384_Scan5852	controllerType=0 controllerNumber=1 scan=5852	22.4758
03945:3	6	K.VAQLEAQC[+57.021]QEPC[+57.021]KDTVQIHDITGK.D		C[+57]*2	923.45	3	2768.33	2768.33	0	0.3	154	Specific	535.75	436.7	436.7	7.41	23	>sp|P02679|FIBG_HUMAN Fibrinogen gamma chain OS=Homo sapiens GN=FGG PE=1 SV=3	6388	File384_Scan5854	controllerType=0 controllerNumber=1 scan=5854	22.4792
03931:4	6	K.VAQLEAQC[+57.021]QEPC[+57.021]KDTVQIHDITGK.D		C[+57]*2	692.839	4	2768.34	2768.33	0	0.4	154	Specific	956.45	924.61	924.61	19.31	23	>sp|P02679|FIBG_HUMAN Fibrinogen gamma chain OS=Homo sapiens GN=FGG PE=1 SV=3	6388	File384_Scan5838	controllerType=0 controllerNumber=1 scan=5838	22.4453
03011:2	6	K.DTVQIHDITGK.D			613.823	2	1226.64	1226.64	0	0.8	167	Specific	710.23	440.53	440.53	13.86	23	>sp|P02679|FIBG_HUMAN Fibrinogen gamma chain OS=Homo sapiens GN=FGG PE=1 SV=3	6388	File384_Scan4806	controllerType=0 controllerNumber=1 scan=4806	20.1679
06153:2	6	K.QSGLYFIK.P			478.266	2	955.524	955.525	0	-0.2	189	Specific	518.46	280.46	280.46	6.83	23	>sp|P02679|FIBG_HUMAN Fibrinogen gamma chain OS=Homo sapiens GN=FGG PE=1 SV=3	6388	File384_Scan8322	controllerType=0 controllerNumber=1 scan=8322	28.4681
06194:3	6	K.QSGLYFIKPLK.A			431.924	3	1293.76	1293.76	0	0	189	Specific	710.98	438.64	438.64	14.2	23	>sp|P02679|FIBG_HUMAN Fibrinogen gamma chain OS=Homo sapiens GN=FGG PE=1 SV=3	6388	File384_Scan8365	controllerType=0 controllerNumber=1 scan=8365	28.554
06192:2	6	K.QSGLYFIKPLK.A			647.382	2	1293.76	1293.76	0	0.8	189	Specific	763.22	547.87	547.87	14.86	23	>sp|P02679|FIBG_HUMAN Fibrinogen gamma chain OS=Homo sapiens GN=FGG PE=1 SV=3	6388	File384_Scan8363	controllerType=0 controllerNumber=1 scan=8363	28.551
02488:2	6	K.RLDGSVDFK.K			518.775	2	1036.54	1036.54	0	0.3	223	Specific	537.6	264.1	264.1	6.28	23	>sp|P02679|FIBG_HUMAN Fibrinogen gamma chain OS=Homo sapiens GN=FGG PE=1 SV=3	6388	File384_Scan4259	controllerType=0 controllerNumber=1 scan=4259	18.92
02387:2	6	K.RLDGSVDFK.K			518.775	2	1036.54	1036.54	0	0.9	223	Specific	639.47	356.44	356.44	9.57	23	>sp|P02679|FIBG_HUMAN Fibrinogen gamma chain OS=Homo sapiens GN=FGG PE=1 SV=3	6388	File384_Scan4154	controllerType=0 controllerNumber=1 scan=4154	18.6852
03270:2	6	R.LDGSVDFK.K			440.725	2	880.443	880.441	0	2.4	224	Specific	379.39	120.19	120.19	4.51	23	>sp|P02679|FIBG_HUMAN Fibrinogen gamma chain OS=Homo sapiens GN=FGG PE=1 SV=3	6388	File384_Scan5077	controllerType=0 controllerNumber=1 scan=5077	20.7536
01527:2	6	R.LDGSVDFKK.N			504.772	2	1008.54	1008.54	0	0.1	224	Specific	587.48	175.37	175.37	6.94	23	>sp|P02679|FIBG_HUMAN Fibrinogen gamma chain OS=Homo sapiens GN=FGG PE=1 SV=3	6388	File384_Scan3254	controllerType=0 controllerNumber=1 scan=3254	16.7169
04194:2	6	K.NWIQYK.E			426.225	2	851.443	851.441	0	1.8	233	Specific	245.25	113.78	113.78	2.67	23	>sp|P02679|FIBG_HUMAN Fibrinogen gamma chain OS=Homo sapiens GN=FGG PE=1 SV=3	6388	File384_Scan6178	controllerType=0 controllerNumber=1 scan=6178	23.2817
08252:3	6	K.EGFGHLSPTGTTEFWLGNEK.I			736.351	3	2207.04	2207.04	0	-0.9	239	Specific	406.23	406.23	406.23	9.23	23	>sp|P02679|FIBG_HUMAN Fibrinogen gamma chain OS=Homo sapiens GN=FGG PE=1 SV=3	6388	File384_Scan10524	controllerType=0 controllerNumber=1 scan=10524	33.0136
08119:3	6	K.EGFGHLSPTGTTEFWLGNEK.I			736.352	3	2207.04	2207.04	0	0.8	239	Specific	599.41	573.18	573.18	12.27	23	>sp|P02679|FIBG_HUMAN Fibrinogen gamma chain OS=Homo sapiens GN=FGG PE=1 SV=3	6388	File384_Scan10385	controllerType=0 controllerNumber=1 scan=10385	32.7343
08015:3	6	K.EGFGHLSPTGTTEFWLGNEK.I			736.353	3	2207.04	2207.04	0	1.4	239	Specific	881.77	814.21	814.21	18.41	23	>sp|P02679|FIBG_HUMAN Fibrinogen gamma chain OS=Homo sapiens GN=FGG PE=1 SV=3	6388	File384_Scan10276	controllerType=0 controllerNumber=1 scan=10276	32.5093
07062:3	6	K.IHLISTQSAIPYALR.V			561.658	3	1682.96	1682.96	0	0.5	259	Specific	692.41	617.94	617.94	13.4	23	>sp|P02679|FIBG_HUMAN Fibrinogen gamma chain OS=Homo sapiens GN=FGG PE=1 SV=3	6388	File384_Scan9274	controllerType=0 controllerNumber=1 scan=9274	30.452
04474:2	6	R.VELEDWNGR.T			559.268	2	1117.53	1117.53	0	0.9	274	Specific	504.45	288.03	288.03	7.11	23	>sp|P02679|FIBG_HUMAN Fibrinogen gamma chain OS=Homo sapiens GN=FGG PE=1 SV=3	6388	File384_Scan6538	controllerType=0 controllerNumber=1 scan=6538	24.1892
03075:2	6	R.TSTADYAM[+15.995]FK.V		M[+16]	575.759	2	1150.51	1150.51	0	1.1	283	Specific	434.66	339.09	339.09	7.4	23	>sp|P02679|FIBG_HUMAN Fibrinogen gamma chain OS=Homo sapiens GN=FGG PE=1 SV=3	6388	File384_Scan4873	controllerType=0 controllerNumber=1 scan=4873	20.3145
00585:2	6	K.VGPEADKYR.L			517.767	2	1034.53	1034.53	0	0.4	293	Specific	478.99	323.39	323.39	6.37	23	>sp|P02679|FIBG_HUMAN Fibrinogen gamma chain OS=Homo sapiens GN=FGG PE=1 SV=3	6388	File384_Scan2266	controllerType=0 controllerNumber=1 scan=2266	14.6071
11121:2	6	R.LTYAYFAGGDAGDAFDGFDFGDDPSDK.F			1417.59	2	2834.18	2834.17	0	1.9	302	Specific	308.28	308.28	308.28	8.1	23	>sp|P02679|FIBG_HUMAN Fibrinogen gamma chain OS=Homo sapiens GN=FGG PE=1 SV=3	6388	File384_Scan13559	controllerType=0 controllerNumber=1 scan=13559	39.2366
01963:3	6	R.LTIGEGQQHHLGGAK.Q			515.943	3	1545.81	1545.81	0	0.7	418	Specific	301.33	160.46	160.46	5.32	23	>sp|P02679|FIBG_HUMAN Fibrinogen gamma chain OS=Homo sapiens GN=FGG PE=1 SV=3	6388	File384_Scan3711	controllerType=0 controllerNumber=1 scan=3711	17.6518
01422:3	6	R.LTIGEGQQHHLGGAK.Q			515.943	3	1545.81	1545.81	0	0.3	418	Specific	513.13	235.8	235.8	7.51	23	>sp|P02679|FIBG_HUMAN Fibrinogen gamma chain OS=Homo sapiens GN=FGG PE=1 SV=3	6388	File384_Scan3141	controllerType=0 controllerNumber=1 scan=3141	16.4879
01166:3	6	R.LTIGEGQQHHLGGAK.Q			515.943	3	1545.81	1545.81	0	0.2	418	Specific	520.7	301.37	301.37	7.77	23	>sp|P02679|FIBG_HUMAN Fibrinogen gamma chain OS=Homo sapiens GN=FGG PE=1 SV=3	6388	File384_Scan2873	controllerType=0 controllerNumber=1 scan=2873	15.9483
01286:3	6	R.LTIGEGQQHHLGGAK.Q			515.943	3	1545.81	1545.81	0	0	418	Specific	586.59	219.72	219.72	8.74	23	>sp|P02679|FIBG_HUMAN Fibrinogen gamma chain OS=Homo sapiens GN=FGG PE=1 SV=3	6388	File384_Scan2999	controllerType=0 controllerNumber=1 scan=2999	16.2033
01179:3	6	R.LTIGEGQQHHLGGAK.Q			515.943	3	1545.81	1545.81	0	0.3	418	Specific	752.23	484.33	484.33	14.84	23	>sp|P02679|FIBG_HUMAN Fibrinogen gamma chain OS=Homo sapiens GN=FGG PE=1 SV=3	6388	File384_Scan2887	controllerType=0 controllerNumber=1 scan=2887	15.9774
01077:3	6	R.LTIGEGQQHHLGGAK.Q			515.943	3	1545.81	1545.81	0	0.2	418	Specific	775.01	496.75	496.75	14.84	23	>sp|P02679|FIBG_HUMAN Fibrinogen gamma chain OS=Homo sapiens GN=FGG PE=1 SV=3	6388	File384_Scan2780	controllerType=0 controllerNumber=1 scan=2780	15.7425
07428:3	7	R.VKDLATVYVDVLK.D			488.289	3	1462.85	1462.85	0	0	35	Specific	447.11	358.68	358.68	6.59	25	>sp|P02647|APOA1_HUMAN Apolipoprotein A-I OS=Homo sapiens GN=APOA1 PE=1 SV=1	789	File384_Scan9658	controllerType=0 controllerNumber=1 scan=9658	31.2423
07323:3	7	R.VKDLATVYVDVLK.D			488.289	3	1462.85	1462.85	0	0.4	35	Specific	601.57	479.55	479.55	11.75	25	>sp|P02647|APOA1_HUMAN Apolipoprotein A-I OS=Homo sapiens GN=APOA1 PE=1 SV=1	789	File384_Scan9548	controllerType=0 controllerNumber=1 scan=9548	31.0244
07329:2	7	R.VKDLATVYVDVLK.D			731.93	2	1462.85	1462.85	0	0.9	35	Specific	695.59	623.36	623.36	12.19	25	>sp|P02647|APOA1_HUMAN Apolipoprotein A-I OS=Homo sapiens GN=APOA1 PE=1 SV=1	789	File384_Scan9554	controllerType=0 controllerNumber=1 scan=9554	31.0337
10271:2	7	K.DLATVYVDVLK.D			618.348	2	1235.69	1235.69	0	0.5	37	Specific	489.92	274.27	274.27	8.09	25	>sp|P02647|APOA1_HUMAN Apolipoprotein A-I OS=Homo sapiens GN=APOA1 PE=1 SV=1	789	File384_Scan12665	controllerType=0 controllerNumber=1 scan=12665	37.4606
10146:2	7	K.DLATVYVDVLK.D			618.348	2	1235.69	1235.69	0	0.6	37	Specific	498.8	325.98	325.98	8.27	25	>sp|P02647|APOA1_HUMAN Apolipoprotein A-I OS=Homo sapiens GN=APOA1 PE=1 SV=1	789	File384_Scan12528	controllerType=0 controllerNumber=1 scan=12528	37.1753
10039:2	7	K.DLATVYVDVLK.D			618.348	2	1235.69	1235.69	0	0.6	37	Specific	566.71	324.4	324.4	8.83	25	>sp|P02647|APOA1_HUMAN Apolipoprotein A-I OS=Homo sapiens GN=APOA1 PE=1 SV=1	789	File384_Scan12416	controllerType=0 controllerNumber=1 scan=12416	36.9433
09934:2	7	K.DLATVYVDVLK.D			618.348	2	1235.69	1235.69	0	0.6	37	Specific	590.32	330.44	330.44	9.25	25	>sp|P02647|APOA1_HUMAN Apolipoprotein A-I OS=Homo sapiens GN=APOA1 PE=1 SV=1	789	File384_Scan12306	controllerType=0 controllerNumber=1 scan=12306	36.7075
09830:2	7	K.DLATVYVDVLK.D			618.348	2	1235.69	1235.69	0	0.8	37	Specific	620.51	335.36	335.36	10.04	25	>sp|P02647|APOA1_HUMAN Apolipoprotein A-I OS=Homo sapiens GN=APOA1 PE=1 SV=1	789	File384_Scan12197	controllerType=0 controllerNumber=1 scan=12197	36.4779
05651:3	7	K.DSGRDYVSQFEGSALGK.Q			605.956	3	1815.85	1815.85	0	1.7	48	Specific	360.41	275.01	275.01	6.65	25	>sp|P02647|APOA1_HUMAN Apolipoprotein A-I OS=Homo sapiens GN=APOA1 PE=1 SV=1	789	File384_Scan7788	controllerType=0 controllerNumber=1 scan=7788	27.2133
05527:3	7	K.DSGRDYVSQFEGSALGK.Q			605.956	3	1815.85	1815.85	0	1.8	48	Specific	711	538.26	538.26	14.15	25	>sp|P02647|APOA1_HUMAN Apolipoprotein A-I OS=Homo sapiens GN=APOA1 PE=1 SV=1	789	File384_Scan7655	controllerType=0 controllerNumber=1 scan=7655	26.9
06657:2	7	R.DYVSQFEGSALGK.Q			700.837	2	1400.67	1400.67	0	-1.2	52	Specific	645.81	591.76	591.76	11.97	25	>sp|P02647|APOA1_HUMAN Apolipoprotein A-I OS=Homo sapiens GN=APOA1 PE=1 SV=1	789	File384_Scan8850	controllerType=0 controllerNumber=1 scan=8850	29.5771
06543:2	7	R.DYVSQFEGSALGK.Q			700.839	2	1400.67	1400.67	0	0.6	52	Specific	700.39	615.78	615.78	14.42	25	>sp|P02647|APOA1_HUMAN Apolipoprotein A-I OS=Homo sapiens GN=APOA1 PE=1 SV=1	789	File384_Scan8730	controllerType=0 controllerNumber=1 scan=8730	29.3372
08687:2	7	K.LLDNWDSVTSTFSK.L			806.897	2	1612.79	1612.79	0	0.6	70	Specific	248.06	182.9	182.9	3.62	25	>sp|P02647|APOA1_HUMAN Apolipoprotein A-I OS=Homo sapiens GN=APOA1 PE=1 SV=1	789	File384_Scan10988	controllerType=0 controllerNumber=1 scan=10988	33.9338
08585:2	7	K.LLDNWDSVTSTFSK.L			806.895	2	1612.78	1612.79	0	-1.8	70	Specific	608.46	427.06	427.06	11.97	25	>sp|P02647|APOA1_HUMAN Apolipoprotein A-I OS=Homo sapiens GN=APOA1 PE=1 SV=1	789	File384_Scan10879	controllerType=0 controllerNumber=1 scan=10879	33.7104
09273:3	7	K.LREQLGPVTQEFWDNLEK.E			734.71	3	2202.12	2202.12	0	-1.2	84	Specific	106.33	106.33	106.33	2.24	25	>sp|P02647|APOA1_HUMAN Apolipoprotein A-I OS=Homo sapiens GN=APOA1 PE=1 SV=1	789	File384_Scan11605	controllerType=0 controllerNumber=1 scan=11605	35.2258
09142:3	7	K.LREQLGPVTQEFWDNLEK.E			734.712	3	2202.12	2202.12	0	0.9	84	Specific	344.67	344.67	344.67	7.13	25	>sp|P02647|APOA1_HUMAN Apolipoprotein A-I OS=Homo sapiens GN=APOA1 PE=1 SV=1	789	File384_Scan11468	controllerType=0 controllerNumber=1 scan=11468	34.9324
09115:3	7	K.LREQLGPVTQEFWDNLEK.E			734.712	3	2202.12	2202.12	0	0.7	84	Specific	521.94	521.75	521.75	10.12	25	>sp|P02647|APOA1_HUMAN Apolipoprotein A-I OS=Homo sapiens GN=APOA1 PE=1 SV=1	789	File384_Scan11440	controllerType=0 controllerNumber=1 scan=11440	34.8755
09008:3	7	K.LREQLGPVTQEFWDNLEK.E			734.712	3	2202.12	2202.12	0	0.7	84	Specific	747.66	678.67	678.67	14.56	25	>sp|P02647|APOA1_HUMAN Apolipoprotein A-I OS=Homo sapiens GN=APOA1 PE=1 SV=1	789	File384_Scan11328	controllerType=0 controllerNumber=1 scan=11328	34.6322
10206:2	7	R.EQLGPVTQEFWDNLEK.E			966.974	2	1932.94	1932.93	0	4	86	Specific	476.42	428.88	428.88	8.75	25	>sp|P02647|APOA1_HUMAN Apolipoprotein A-I OS=Homo sapiens GN=APOA1 PE=1 SV=1	789	File384_Scan12595	controllerType=0 controllerNumber=1 scan=12595	37.319
10105:2	7	R.EQLGPVTQEFWDNLEK.E			966.97	2	1932.93	1932.93	0	-0.3	86	Specific	610.51	554.65	554.65	12.45	25	>sp|P02647|APOA1_HUMAN Apolipoprotein A-I OS=Homo sapiens GN=APOA1 PE=1 SV=1	789	File384_Scan12485	controllerType=0 controllerNumber=1 scan=12485	37.0843
01581:3	7	K.ETEGLRQEM[+15.995]SKDLEEVK.A		M[+16]	679.665	3	2036.98	2036.98	0	0.5	102	Specific	62.23	50.1	50.1	0.48	25	>sp|P02647|APOA1_HUMAN Apolipoprotein A-I OS=Homo sapiens GN=APOA1 PE=1 SV=1	789	File384_Scan3310	controllerType=0 controllerNumber=1 scan=3310	16.8238
00742:2	7	R.QEM[+15.995]SKDLEEVK.A		M[+16]	676.325	2	1351.64	1351.64	0	1.1	108	Specific	66.3	66.3	66.3	0.7	25	>sp|P02647|APOA1_HUMAN Apolipoprotein A-I OS=Homo sapiens GN=APOA1 PE=1 SV=1	789	File384_Scan2429	controllerType=0 controllerNumber=1 scan=2429	14.9709
00731:3	7	R.QEM[+15.995]SKDLEEVK.A		M[+16]	451.219	3	1351.64	1351.64	0	1.1	108	Specific	239.95	207.18	207.18	3.9	25	>sp|P02647|APOA1_HUMAN Apolipoprotein A-I OS=Homo sapiens GN=APOA1 PE=1 SV=1	789	File384_Scan2418	controllerType=0 controllerNumber=1 scan=2418	14.9456
05231:2	7	K.VQPYLDDFQK.K			626.814	2	1252.62	1252.62	0	0.1	121	Specific	336.86	156.29	156.29	5.07	25	>sp|P02647|APOA1_HUMAN Apolipoprotein A-I OS=Homo sapiens GN=APOA1 PE=1 SV=1	789	File384_Scan7344	controllerType=0 controllerNumber=1 scan=7344	26.1853
05132:2	7	K.VQPYLDDFQK.K			626.816	2	1252.62	1252.62	0	2.6	121	Specific	469.7	224.95	224.95	6.68	25	>sp|P02647|APOA1_HUMAN Apolipoprotein A-I OS=Homo sapiens GN=APOA1 PE=1 SV=1	789	File384_Scan7241	controllerType=0 controllerNumber=1 scan=7241	25.928
04001:2	7	K.VQPYLDDFQKK.W			690.862	2	1380.72	1380.72	0	1.1	121	Specific	470.85	297.52	297.52	6.05	25	>sp|P02647|APOA1_HUMAN Apolipoprotein A-I OS=Homo sapiens GN=APOA1 PE=1 SV=1	789	File384_Scan5921	controllerType=0 controllerNumber=1 scan=5921	22.6374
03976:3	7	K.VQPYLDDFQKK.W			460.91	3	1380.72	1380.72	0	-0.2	121	Specific	568.44	407.85	407.85	9.42	25	>sp|P02647|APOA1_HUMAN Apolipoprotein A-I OS=Homo sapiens GN=APOA1 PE=1 SV=1	789	File384_Scan5895	controllerType=0 controllerNumber=1 scan=5895	22.5773
04186:2	7	K.WQEEM[+15.995]ELYR.Q		M[+16]	650.288	2	1299.57	1299.57	0	1.1	132	Specific	233.23	233.23	233.23	4.76	25	>sp|P02647|APOA1_HUMAN Apolipoprotein A-I OS=Homo sapiens GN=APOA1 PE=1 SV=1	789	File384_Scan6169	controllerType=0 controllerNumber=1 scan=6169	23.263
04107:2	7	K.WQEEM[+15.995]ELYR.Q		M[+16]	650.288	2	1299.57	1299.57	0	0.6	132	Specific	357.17	342.02	342.02	6.33	25	>sp|P02647|APOA1_HUMAN Apolipoprotein A-I OS=Homo sapiens GN=APOA1 PE=1 SV=1	789	File384_Scan6061	controllerType=0 controllerNumber=1 scan=6061	22.9936
04033:2	7	K.WQEEM[+15.995]ELYR.Q		M[+16]	650.288	2	1299.57	1299.57	0	0.4	132	Specific	409.71	409.71	409.71	8.44	25	>sp|P02647|APOA1_HUMAN Apolipoprotein A-I OS=Homo sapiens GN=APOA1 PE=1 SV=1	789	File384_Scan5963	controllerType=0 controllerNumber=1 scan=5963	22.7442
00590:2	7	R.QKVEPLR.A			435.264	2	869.52	869.52	0	0	141	Specific	310.41	163.16	163.16	3.69	25	>sp|P02647|APOA1_HUMAN Apolipoprotein A-I OS=Homo sapiens GN=APOA1 PE=1 SV=1	789	File384_Scan2271	controllerType=0 controllerNumber=1 scan=2271	14.6162
03310:2	7	K.VEPLRAELQEGAR.Q			734.4	2	1467.79	1467.79	0	0.8	143	Specific	207.92	114.02	114.02	1.51	25	>sp|P02647|APOA1_HUMAN Apolipoprotein A-I OS=Homo sapiens GN=APOA1 PE=1 SV=1	789	File384_Scan5118	controllerType=0 controllerNumber=1 scan=5118	20.838
03288:3	7	K.VEPLRAELQEGAR.Q			489.936	3	1467.79	1467.79	0	2	143	Specific	594.18	447.62	447.62	10.9	25	>sp|P02647|APOA1_HUMAN Apolipoprotein A-I OS=Homo sapiens GN=APOA1 PE=1 SV=1	789	File384_Scan5095	controllerType=0 controllerNumber=1 scan=5095	20.7931
00497:2	7	R.AELQEGAR.Q			437.225	2	873.443	873.442	0	0.1	148	Specific	424.52	81.18	81.18	4.87	25	>sp|P02647|APOA1_HUMAN Apolipoprotein A-I OS=Homo sapiens GN=APOA1 PE=1 SV=1	789	File384_Scan2175	controllerType=0 controllerNumber=1 scan=2175	14.3834
02977:2	7	K.LSPLGEEM[+15.995]R.D		M[+16]	524.26	2	1047.51	1047.51	0	-0.2	165	Specific	266	116.2	116.2	4.43	25	>sp|P02647|APOA1_HUMAN Apolipoprotein A-I OS=Homo sapiens GN=APOA1 PE=1 SV=1	789	File384_Scan4770	controllerType=0 controllerNumber=1 scan=4770	20.0793
02852:2	7	K.LSPLGEEM[+15.995]R.D		M[+16]	524.261	2	1047.51	1047.51	0	0.4	165	Specific	328.38	171.93	171.93	6.07	25	>sp|P02647|APOA1_HUMAN Apolipoprotein A-I OS=Homo sapiens GN=APOA1 PE=1 SV=1	789	File384_Scan4640	controllerType=0 controllerNumber=1 scan=4640	19.774
02751:2	7	K.LSPLGEEM[+15.995]R.D		M[+16]	524.26	2	1047.51	1047.51	0	-0.7	165	Specific	363.26	160.85	160.85	5.75	25	>sp|P02647|APOA1_HUMAN Apolipoprotein A-I OS=Homo sapiens GN=APOA1 PE=1 SV=1	789	File384_Scan4535	controllerType=0 controllerNumber=1 scan=4535	19.5332
02652:2	7	K.LSPLGEEM[+15.995]R.D		M[+16]	524.26	2	1047.51	1047.51	0	-1.5	165	Specific	407.74	183.91	183.91	5.99	25	>sp|P02647|APOA1_HUMAN Apolipoprotein A-I OS=Homo sapiens GN=APOA1 PE=1 SV=1	789	File384_Scan4432	controllerType=0 controllerNumber=1 scan=4432	19.279
01629:3	7	K.LSPLGEEM[+15.995]RDR.A		M[+16]	440.219	3	1318.64	1318.64	0	0.3	165	Specific	309.98	212.77	212.77	4.58	25	>sp|P02647|APOA1_HUMAN Apolipoprotein A-I OS=Homo sapiens GN=APOA1 PE=1 SV=1	789	File384_Scan3361	controllerType=0 controllerNumber=1 scan=3361	16.9339
03305:2	7	R.THLAPYSDELR.Q			651.328	2	1301.65	1301.65	0	0.9	185	Specific	460.98	318.99	318.99	6.71	25	>sp|P02647|APOA1_HUMAN Apolipoprotein A-I OS=Homo sapiens GN=APOA1 PE=1 SV=1	789	File384_Scan5113	controllerType=0 controllerNumber=1 scan=5113	20.8289
03511:3	7	R.THLAPYSDELR.Q			434.554	3	1301.65	1301.65	0	0.3	185	Specific	502.71	437.98	437.98	9.92	25	>sp|P02647|APOA1_HUMAN Apolipoprotein A-I OS=Homo sapiens GN=APOA1 PE=1 SV=1	789	File384_Scan5328	controllerType=0 controllerNumber=1 scan=5328	21.2974
03389:3	7	R.THLAPYSDELR.Q			434.554	3	1301.65	1301.65	0	-0.1	185	Specific	509.74	430.37	430.37	9.01	25	>sp|P02647|APOA1_HUMAN Apolipoprotein A-I OS=Homo sapiens GN=APOA1 PE=1 SV=1	789	File384_Scan5201	controllerType=0 controllerNumber=1 scan=5201	21.0131
03271:3	7	R.THLAPYSDELR.Q			434.555	3	1301.65	1301.65	0	1.6	185	Specific	592.56	544.21	544.21	11.57	25	>sp|P02647|APOA1_HUMAN Apolipoprotein A-I OS=Homo sapiens GN=APOA1 PE=1 SV=1	789	File384_Scan5078	controllerType=0 controllerNumber=1 scan=5078	20.7549
03190:2	7	R.THLAPYSDELR.Q			651.327	2	1301.65	1301.65	0	-1.6	185	Specific	622.17	474.43	474.43	11.41	25	>sp|P02647|APOA1_HUMAN Apolipoprotein A-I OS=Homo sapiens GN=APOA1 PE=1 SV=1	789	File384_Scan4993	controllerType=0 controllerNumber=1 scan=4993	20.583
03167:3	7	R.THLAPYSDELR.Q			434.554	3	1301.65	1301.65	0	-1.2	185	Specific	652.19	595.97	595.97	12.97	25	>sp|P02647|APOA1_HUMAN Apolipoprotein A-I OS=Homo sapiens GN=APOA1 PE=1 SV=1	789	File384_Scan4969	controllerType=0 controllerNumber=1 scan=4969	20.5353
03088:2	7	R.THLAPYSDELR.Q			651.328	2	1301.65	1301.65	0	0.9	185	Specific	654.18	521.02	521.02	12.86	25	>sp|P02647|APOA1_HUMAN Apolipoprotein A-I OS=Homo sapiens GN=APOA1 PE=1 SV=1	789	File384_Scan4886	controllerType=0 controllerNumber=1 scan=4886	20.3403
03064:3	7	R.THLAPYSDELR.Q			434.554	3	1301.65	1301.65	0	0.1	185	Specific	678.65	624.81	624.81	13.42	25	>sp|P02647|APOA1_HUMAN Apolipoprotein A-I OS=Homo sapiens GN=APOA1 PE=1 SV=1	789	File384_Scan4861	controllerType=0 controllerNumber=1 scan=4861	20.2887
03078:2	7	R.THLAPYSDELR.Q			651.328	2	1301.65	1301.65	0	0.9	185	Specific	699.09	543.61	543.61	12.86	25	>sp|P02647|APOA1_HUMAN Apolipoprotein A-I OS=Homo sapiens GN=APOA1 PE=1 SV=1	789	File384_Scan4876	controllerType=0 controllerNumber=1 scan=4876	20.3235
00781:2	7	R.LEALKENGGAR.L			579.317	2	1157.63	1157.63	0	-0.4	202	Specific	312.36	200.28	200.28	4.52	25	>sp|P02647|APOA1_HUMAN Apolipoprotein A-I OS=Homo sapiens GN=APOA1 PE=1 SV=1	789	File384_Scan2470	controllerType=0 controllerNumber=1 scan=2470	15.0734
01107:3	7	K.ATEHLSTLSEK.A			405.879	3	1215.62	1215.62	0	0.3	220	Specific	404.72	301.2	301.2	6.97	25	>sp|P02647|APOA1_HUMAN Apolipoprotein A-I OS=Homo sapiens GN=APOA1 PE=1 SV=1	789	File384_Scan2811	controllerType=0 controllerNumber=1 scan=2811	15.8092
00980:3	7	K.ATEHLSTLSEK.A			405.879	3	1215.62	1215.62	0	-0.3	220	Specific	666.85	430.57	430.57	13.2	25	>sp|P02647|APOA1_HUMAN Apolipoprotein A-I OS=Homo sapiens GN=APOA1 PE=1 SV=1	789	File384_Scan2679	controllerType=0 controllerNumber=1 scan=2679	15.5181
00986:2	7	K.ATEHLSTLSEK.A			608.314	2	1215.62	1215.62	0	0.2	220	Specific	988.47	613.39	613.39	18.86	25	>sp|P02647|APOA1_HUMAN Apolipoprotein A-I OS=Homo sapiens GN=APOA1 PE=1 SV=1	789	File384_Scan2685	controllerType=0 controllerNumber=1 scan=2685	15.5316
02549:2	7	K.AKPALEDLR.Q			506.792	2	1012.58	1012.58	0	-1.8	231	Specific	253	131.07	131.07	2.88	25	>sp|P02647|APOA1_HUMAN Apolipoprotein A-I OS=Homo sapiens GN=APOA1 PE=1 SV=1	789	File384_Scan4323	controllerType=0 controllerNumber=1 scan=4323	19.0523
02412:2	7	K.AKPALEDLR.Q			506.793	2	1012.58	1012.58	0	0.8	231	Specific	273.24	131.43	131.43	3.95	25	>sp|P02647|APOA1_HUMAN Apolipoprotein A-I OS=Homo sapiens GN=APOA1 PE=1 SV=1	789	File384_Scan4180	controllerType=0 controllerNumber=1 scan=4180	18.7457
02307:2	7	K.AKPALEDLR.Q			506.793	2	1012.58	1012.58	0	-0.4	231	Specific	351.66	146.23	146.23	5.31	25	>sp|P02647|APOA1_HUMAN Apolipoprotein A-I OS=Homo sapiens GN=APOA1 PE=1 SV=1	789	File384_Scan4071	controllerType=0 controllerNumber=1 scan=4071	18.4841
02208:2	7	K.AKPALEDLR.Q			506.793	2	1012.58	1012.58	0	0.5	231	Specific	444.98	235.86	235.86	7.28	25	>sp|P02647|APOA1_HUMAN Apolipoprotein A-I OS=Homo sapiens GN=APOA1 PE=1 SV=1	789	File384_Scan3968	controllerType=0 controllerNumber=1 scan=3968	18.2242
02247:2	7	K.PALEDLR.Q			407.227	2	813.446	813.447	0	-0.4	233	Specific	339.13	129.11	129.11	4.66	25	>sp|P02647|APOA1_HUMAN Apolipoprotein A-I OS=Homo sapiens GN=APOA1 PE=1 SV=1	789	File384_Scan4008	controllerType=0 controllerNumber=1 scan=4008	18.3253
11788:2	7	R.QGLLPVLESFK.V			615.858	2	1230.71	1230.71	0	-0.3	240	Specific	62.62	62.62	62.62	1.69	25	>sp|P02647|APOA1_HUMAN Apolipoprotein A-I OS=Homo sapiens GN=APOA1 PE=1 SV=1	789	File384_Scan14322	controllerType=0 controllerNumber=1 scan=14322	41.0923
12200:2	7	R.QGLLPVLESFK.V			615.859	2	1230.71	1230.71	0	0.4	240	Specific	163.52	163.52	163.52	4.15	25	>sp|P02647|APOA1_HUMAN Apolipoprotein A-I OS=Homo sapiens GN=APOA1 PE=1 SV=1	789	File384_Scan14829	controllerType=0 controllerNumber=1 scan=14829	42.2376
11199:2	7	R.QGLLPVLESFK.V			615.859	2	1230.71	1230.71	0	0.7	240	Specific	215.13	215.13	215.13	4.89	25	>sp|P02647|APOA1_HUMAN Apolipoprotein A-I OS=Homo sapiens GN=APOA1 PE=1 SV=1	789	File384_Scan13640	controllerType=0 controllerNumber=1 scan=13640	39.4235
11415:2	7	R.QGLLPVLESFK.V			615.859	2	1230.71	1230.71	0	0.4	240	Specific	266.44	234.55	234.55	5.96	25	>sp|P02647|APOA1_HUMAN Apolipoprotein A-I OS=Homo sapiens GN=APOA1 PE=1 SV=1	789	File384_Scan13869	controllerType=0 controllerNumber=1 scan=13869	39.9348
10758:2	7	R.QGLLPVLESFK.V			615.858	2	1230.71	1230.71	0	0	240	Specific	310.05	295.79	295.79	7.12	25	>sp|P02647|APOA1_HUMAN Apolipoprotein A-I OS=Homo sapiens GN=APOA1 PE=1 SV=1	789	File384_Scan13176	controllerType=0 controllerNumber=1 scan=13176	38.4815
11308:2	7	R.QGLLPVLESFK.V			615.859	2	1230.71	1230.71	0	0.6	240	Specific	365.86	304.17	304.17	7.85	25	>sp|P02647|APOA1_HUMAN Apolipoprotein A-I OS=Homo sapiens GN=APOA1 PE=1 SV=1	789	File384_Scan13754	controllerType=0 controllerNumber=1 scan=13754	39.6712
11061:2	7	R.QGLLPVLESFK.V			615.859	2	1230.71	1230.71	0	0.6	240	Specific	410.63	345.34	345.34	8.21	25	>sp|P02647|APOA1_HUMAN Apolipoprotein A-I OS=Homo sapiens GN=APOA1 PE=1 SV=1	789	File384_Scan13496	controllerType=0 controllerNumber=1 scan=13496	39.1128
10958:2	7	R.QGLLPVLESFK.V			615.859	2	1230.71	1230.71	0	0.8	240	Specific	620.57	493.66	493.66	12.42	25	>sp|P02647|APOA1_HUMAN Apolipoprotein A-I OS=Homo sapiens GN=APOA1 PE=1 SV=1	789	File384_Scan13388	controllerType=0 controllerNumber=1 scan=13388	38.9027
10856:2	7	R.QGLLPVLESFK.V			615.858	2	1230.71	1230.71	0	0.2	240	Specific	671.63	493.73	493.73	13.42	25	>sp|P02647|APOA1_HUMAN Apolipoprotein A-I OS=Homo sapiens GN=APOA1 PE=1 SV=1	789	File384_Scan13281	controllerType=0 controllerNumber=1 scan=13281	38.6933
11698:2	7	K.VSFLSALEEYTK.K			693.862	2	1386.72	1386.72	0	0.6	251	Specific	127.55	127.55	127.55	2.88	25	>sp|P02647|APOA1_HUMAN Apolipoprotein A-I OS=Homo sapiens GN=APOA1 PE=1 SV=1	789	File384_Scan14215	controllerType=0 controllerNumber=1 scan=14215	40.8438
11805:2	7	K.VSFLSALEEYTK.K			693.861	2	1386.72	1386.72	0	0.1	251	Specific	139.38	139.38	139.38	2.95	25	>sp|P02647|APOA1_HUMAN Apolipoprotein A-I OS=Homo sapiens GN=APOA1 PE=1 SV=1	789	File384_Scan14340	controllerType=0 controllerNumber=1 scan=14340	41.131
11493:2	7	K.VSFLSALEEYTK.K			693.861	2	1386.72	1386.72	0	0.1	251	Specific	440.34	436.01	436.01	9.8	25	>sp|P02647|APOA1_HUMAN Apolipoprotein A-I OS=Homo sapiens GN=APOA1 PE=1 SV=1	789	File384_Scan13961	controllerType=0 controllerNumber=1 scan=13961	40.1675
11600:2	7	K.VSFLSALEEYTK.K			693.862	2	1386.72	1386.72	0	0.5	251	Specific	486.81	486.81	486.81	9.94	25	>sp|P02647|APOA1_HUMAN Apolipoprotein A-I OS=Homo sapiens GN=APOA1 PE=1 SV=1	789	File384_Scan14085	controllerType=0 controllerNumber=1 scan=14085	40.5002
11380:2	7	K.VSFLSALEEYTK.K			693.862	2	1386.72	1386.72	0	1.8	251	Specific	599.47	519.36	519.36	11.75	25	>sp|P02647|APOA1_HUMAN Apolipoprotein A-I OS=Homo sapiens GN=APOA1 PE=1 SV=1	789	File384_Scan13833	controllerType=0 controllerNumber=1 scan=13833	39.853
11299:2	7	K.VSFLSALEEYTK.K			693.861	2	1386.72	1386.72	0	0.4	251	Specific	699.29	439.54	439.54	13.61	25	>sp|P02647|APOA1_HUMAN Apolipoprotein A-I OS=Homo sapiens GN=APOA1 PE=1 SV=1	789	File384_Scan13744	controllerType=0 controllerNumber=1 scan=13744	39.6496
09514:2	7	K.VSFLSALEEYTKK.L			757.909	2	1514.81	1514.81	0	1.1	251	Specific	522.09	464.28	464.28	8.9	25	>sp|P02647|APOA1_HUMAN Apolipoprotein A-I OS=Homo sapiens GN=APOA1 PE=1 SV=1	789	File384_Scan11858	controllerType=0 controllerNumber=1 scan=11858	35.7748
09502:3	7	K.VSFLSALEEYTKK.L			505.608	3	1514.81	1514.81	0	0.3	251	Specific	735.88	735.88	735.88	13.75	25	>sp|P02647|APOA1_HUMAN Apolipoprotein A-I OS=Homo sapiens GN=APOA1 PE=1 SV=1	789	File384_Scan11845	controllerType=0 controllerNumber=1 scan=11845	35.7437
10086:3	8	R.TLNQPDSQLQLTTGNGLFLSEGLK.L			858.788	3	2574.35	2574.34	0	3	126	Specific	170.7	170.7	170.7	3.52	22	>sp|P01009|A1AT_HUMAN Alpha-1-antitrypsin OS=Homo sapiens GN=SERPINA1 PE=1 SV=3	47	File384_Scan12465	controllerType=0 controllerNumber=1 scan=12465	37.0458
09886:2	8	R.TLNQPDSQLQLTTGNGLFLSEGLK.L			1287.68	2	2574.35	2574.34	0	5	126	Specific	495.06	495.06	495.06	9	22	>sp|P01009|A1AT_HUMAN Alpha-1-antitrypsin OS=Homo sapiens GN=SERPINA1 PE=1 SV=3	47	File384_Scan12255	controllerType=0 controllerNumber=1 scan=12255	36.6007
09983:3	8	R.TLNQPDSQLQLTTGNGLFLSEGLK.L			858.787	3	2574.35	2574.34	0	1.8	126	Specific	532.43	532.43	532.43	10.77	22	>sp|P01009|A1AT_HUMAN Alpha-1-antitrypsin OS=Homo sapiens GN=SERPINA1 PE=1 SV=3	47	File384_Scan12357	controllerType=0 controllerNumber=1 scan=12357	36.8254
09876:3	8	R.TLNQPDSQLQLTTGNGLFLSEGLK.L			858.787	3	2574.35	2574.34	0	2.2	126	Specific	736.74	736.74	736.74	14.7	22	>sp|P01009|A1AT_HUMAN Alpha-1-antitrypsin OS=Homo sapiens GN=SERPINA1 PE=1 SV=3	47	File384_Scan12245	controllerType=0 controllerNumber=1 scan=12245	36.5832
04150:3	8	K.LVDKFLEDVKK.L			445.262	3	1333.77	1333.77	0	0.1	150	Specific	439.82	240.72	240.72	5.91	22	>sp|P01009|A1AT_HUMAN Alpha-1-antitrypsin OS=Homo sapiens GN=SERPINA1 PE=1 SV=3	47	File384_Scan6122	controllerType=0 controllerNumber=1 scan=6122	23.1526
01702:2	8	K.FLEDVKK.L			439.753	2	878.498	878.498	0	-0.3	154	Specific	253.73	67.48	67.48	1.62	22	>sp|P01009|A1AT_HUMAN Alpha-1-antitrypsin OS=Homo sapiens GN=SERPINA1 PE=1 SV=3	47	File384_Scan3437	controllerType=0 controllerNumber=1 scan=3437	17.0881
01592:2	8	K.FLEDVKK.L			439.753	2	878.498	878.498	0	0.2	154	Specific	310.97	73.81	73.81	1.95	22	>sp|P01009|A1AT_HUMAN Alpha-1-antitrypsin OS=Homo sapiens GN=SERPINA1 PE=1 SV=3	47	File384_Scan3322	controllerType=0 controllerNumber=1 scan=3322	16.8497
01473:2	8	K.FLEDVKK.L			439.752	2	878.497	878.498	0	-1.6	154	Specific	488.18	147.51	147.51	3.82	22	>sp|P01009|A1AT_HUMAN Alpha-1-antitrypsin OS=Homo sapiens GN=SERPINA1 PE=1 SV=3	47	File384_Scan3195	controllerType=0 controllerNumber=1 scan=3195	16.6008
05786:3	8	K.LYHSEAFTVNFGDTEEAK.K			686.654	3	2057.95	2057.95	0	0.8	161	Specific	749.34	653.25	653.25	15.22	22	>sp|P01009|A1AT_HUMAN Alpha-1-antitrypsin OS=Homo sapiens GN=SERPINA1 PE=1 SV=3	47	File384_Scan7939	controllerType=0 controllerNumber=1 scan=7939	27.5882
05021:3	8	K.LYHSEAFTVNFGDTEEAKK.Q			729.353	3	2186.04	2186.04	0	1.6	161	Specific	468.41	468.41	468.41	9.62	22	>sp|P01009|A1AT_HUMAN Alpha-1-antitrypsin OS=Homo sapiens GN=SERPINA1 PE=1 SV=3	47	File384_Scan7125	controllerType=0 controllerNumber=1 scan=7125	25.6315
05341:4	8	K.LYHSEAFTVNFGDTEEAKK.Q			547.265	4	2186.04	2186.04	0	-0.3	161	Specific	669.87	653.34	653.34	13.52	22	>sp|P01009|A1AT_HUMAN Alpha-1-antitrypsin OS=Homo sapiens GN=SERPINA1 PE=1 SV=3	47	File384_Scan7458	controllerType=0 controllerNumber=1 scan=7458	26.4471
04901:3	8	K.LYHSEAFTVNFGDTEEAKK.Q			729.351	3	2186.04	2186.04	0	-0.1	161	Specific	676.87	610.59	610.59	12.96	22	>sp|P01009|A1AT_HUMAN Alpha-1-antitrypsin OS=Homo sapiens GN=SERPINA1 PE=1 SV=3	47	File384_Scan7000	controllerType=0 controllerNumber=1 scan=7000	25.3363
04886:4	8	K.LYHSEAFTVNFGDTEEAKK.Q			547.267	4	2186.04	2186.04	0	2.2	161	Specific	726.11	667.23	667.23	14.37	22	>sp|P01009|A1AT_HUMAN Alpha-1-antitrypsin OS=Homo sapiens GN=SERPINA1 PE=1 SV=3	47	File384_Scan6985	controllerType=0 controllerNumber=1 scan=6985	25.305
05121:4	8	K.LYHSEAFTVNFGDTEEAKK.Q			547.266	4	2186.04	2186.04	0	0.5	161	Specific	783.34	747.05	747.05	15.74	22	>sp|P01009|A1AT_HUMAN Alpha-1-antitrypsin OS=Homo sapiens GN=SERPINA1 PE=1 SV=3	47	File384_Scan7229	controllerType=0 controllerNumber=1 scan=7229	25.8934
05010:4	8	K.LYHSEAFTVNFGDTEEAKK.Q			547.266	4	2186.04	2186.04	0	0.4	161	Specific	851.54	786.18	786.18	17.74	22	>sp|P01009|A1AT_HUMAN Alpha-1-antitrypsin OS=Homo sapiens GN=SERPINA1 PE=1 SV=3	47	File384_Scan7114	controllerType=0 controllerNumber=1 scan=7114	25.6092
00961:2	8	K.KQINDYVEK.G			568.801	2	1136.6	1136.59	0	0.5	179	Specific	614.62	309.87	309.87	9.38	22	>sp|P01009|A1AT_HUMAN Alpha-1-antitrypsin OS=Homo sapiens GN=SERPINA1 PE=1 SV=3	47	File384_Scan2659	controllerType=0 controllerNumber=1 scan=2659	15.4796
01824:2	8	K.QINDYVEK.G			504.754	2	1008.5	1008.5	0	0.7	180	Specific	347.89	117.94	117.94	4.85	22	>sp|P01009|A1AT_HUMAN Alpha-1-antitrypsin OS=Homo sapiens GN=SERPINA1 PE=1 SV=3	47	File384_Scan3565	controllerType=0 controllerNumber=1 scan=3565	17.3444
01707:2	8	K.QINDYVEK.G			504.754	2	1008.5	1008.5	0	0.5	180	Specific	565.4	219.44	219.44	8.07	22	>sp|P01009|A1AT_HUMAN Alpha-1-antitrypsin OS=Homo sapiens GN=SERPINA1 PE=1 SV=3	47	File384_Scan3442	controllerType=0 controllerNumber=1 scan=3442	17.0965
04377:3	8	K.DTEEEDFHVDQVTTVK.V			631.291	3	1891.86	1891.86	0	1.3	226	Specific	549.97	508.78	508.78	10.54	22	>sp|P01009|A1AT_HUMAN Alpha-1-antitrypsin OS=Homo sapiens GN=SERPINA1 PE=1 SV=3	47	File384_Scan6425	controllerType=0 controllerNumber=1 scan=6425	23.9001
04299:3	8	K.DTEEEDFHVDQVTTVK.V			631.291	3	1891.86	1891.86	0	1	226	Specific	740.76	577.91	577.91	14.81	22	>sp|P01009|A1AT_HUMAN Alpha-1-antitrypsin OS=Homo sapiens GN=SERPINA1 PE=1 SV=3	47	File384_Scan6321	controllerType=0 controllerNumber=1 scan=6321	23.6316
04312:2	8	K.DTEEEDFHVDQVTTVK.V			946.432	2	1891.86	1891.86	0	0.9	226	Specific	784.32	726.59	726.59	15.11	22	>sp|P01009|A1AT_HUMAN Alpha-1-antitrypsin OS=Homo sapiens GN=SERPINA1 PE=1 SV=3	47	File384_Scan6347	controllerType=0 controllerNumber=1 scan=6347	23.7011
02611:3	8	R.LGM[+15.995]FNIQHC[+57.021]K.K		C[+57], M[+16]	421.871	3	1263.6	1263.6	0	0.1	248	Specific	476.57	430.21	430.21	9.08	22	>sp|P01009|A1AT_HUMAN Alpha-1-antitrypsin OS=Homo sapiens GN=SERPINA1 PE=1 SV=3	47	File384_Scan4388	controllerType=0 controllerNumber=1 scan=4388	19.1877
07761:2	8	K.LSSWVLLM[+15.995]K.Y		M[+16]	546.809	2	1092.61	1092.61	0	-0.5	259	Specific	533.73	303.97	303.97	8.18	22	>sp|P01009|A1AT_HUMAN Alpha-1-antitrypsin OS=Homo sapiens GN=SERPINA1 PE=1 SV=3	47	File384_Scan10009	controllerType=0 controllerNumber=1 scan=10009	31.9537
11394:3	8	K.YLGN[+2261.794]ATAIFFLPDEGK.L	HexNAc(5)Hex(4)NeuAc(1)NeuGc(1)	N[+2262]	1339.56	3	4016.67	4017.69	-1	-4.7	268	Specific	162.88	117.56	117.56	3	22	>sp|P01009|A1AT_HUMAN Alpha-1-antitrypsin OS=Homo sapiens GN=SERPINA1 PE=1 SV=3	47	File384_Scan13847	controllerType=0 controllerNumber=1 scan=13847	39.8853
11342:3	8	K.YLGN[+2204.772]ATAIFFLPDEGK.L	HexNAc(4)Hex(5)NeuAc(2)	N[+2205]	1320.89	3	3960.66	3960.67	0	-3.2	268	Specific	170.57	112.12	112.12	3.07	22	>sp|P01009|A1AT_HUMAN Alpha-1-antitrypsin OS=Homo sapiens GN=SERPINA1 PE=1 SV=3	47	File384_Scan13790	controllerType=0 controllerNumber=1 scan=13790	39.7399
11396:3	8	K.YLGN[+2261.794]ATAIFFLPDEGK.L	HexNAc(5)Hex(4)NeuAc(1)NeuGc(1)	N[+2262]	1339.56	3	4016.67	4017.69	-1	-4.7	268	Specific	325.6	242.53	242.53	6.2	22	>sp|P01009|A1AT_HUMAN Alpha-1-antitrypsin OS=Homo sapiens GN=SERPINA1 PE=1 SV=3	47	File384_Scan13849	controllerType=0 controllerNumber=1 scan=13849	39.8901
11344:3	8	K.YLGN[+2204.772]ATAIFFLPDEGK.L	HexNAc(4)Hex(5)NeuAc(2)	N[+2205]	1320.89	3	3960.66	3960.67	0	-3.2	268	Specific	355.46	240.54	240.54	6.39	22	>sp|P01009|A1AT_HUMAN Alpha-1-antitrypsin OS=Homo sapiens GN=SERPINA1 PE=1 SV=3	47	File384_Scan13792	controllerType=0 controllerNumber=1 scan=13792	39.7466
05047:3	8	K.LQHLENELTHDIITK.F			601.992	3	1803.96	1803.96	0	0.7	284	Specific	422.72	267.38	267.38	6.2	22	>sp|P01009|A1AT_HUMAN Alpha-1-antitrypsin OS=Homo sapiens GN=SERPINA1 PE=1 SV=3	47	File384_Scan7152	controllerType=0 controllerNumber=1 scan=7152	25.6963
04919:3	8	K.LQHLENELTHDIITK.F			601.992	3	1803.96	1803.96	0	1.4	284	Specific	559.73	399.68	399.68	9.71	22	>sp|P01009|A1AT_HUMAN Alpha-1-antitrypsin OS=Homo sapiens GN=SERPINA1 PE=1 SV=3	47	File384_Scan7019	controllerType=0 controllerNumber=1 scan=7019	25.3815
04807:3	8	K.LQHLENELTHDIITK.F			601.992	3	1803.96	1803.96	0	0.8	284	Specific	817.42	576.58	576.58	15.84	22	>sp|P01009|A1AT_HUMAN Alpha-1-antitrypsin OS=Homo sapiens GN=SERPINA1 PE=1 SV=3	47	File384_Scan6903	controllerType=0 controllerNumber=1 scan=6903	25.0882
04691:3	8	K.LQHLENELTHDIITK.F			601.992	3	1803.96	1803.96	0	1.4	284	Specific	851.53	637.05	637.05	16.98	22	>sp|P01009|A1AT_HUMAN Alpha-1-antitrypsin OS=Homo sapiens GN=SERPINA1 PE=1 SV=3	47	File384_Scan6783	controllerType=0 controllerNumber=1 scan=6783	24.7636
01529:2	8	K.FLENEDR.R			461.717	2	922.426	922.427	0	-0.3	299	Specific	385.55	114.06	114.06	4.5	22	>sp|P01009|A1AT_HUMAN Alpha-1-antitrypsin OS=Homo sapiens GN=SERPINA1 PE=1 SV=3	47	File384_Scan3256	controllerType=0 controllerNumber=1 scan=3256	16.7213
00963:2	8	K.FLENEDRR.S			539.768	2	1078.53	1078.53	0	0.4	299	Specific	535.73	274.45	274.45	4.78	22	>sp|P01009|A1AT_HUMAN Alpha-1-antitrypsin OS=Homo sapiens GN=SERPINA1 PE=1 SV=3	47	File384_Scan2661	controllerType=0 controllerNumber=1 scan=2661	15.4827
00857:2	8	K.FLENEDRR.S			539.768	2	1078.53	1078.53	0	0.5	299	Specific	682.58	392.59	392.59	10.27	22	>sp|P01009|A1AT_HUMAN Alpha-1-antitrypsin OS=Homo sapiens GN=SERPINA1 PE=1 SV=3	47	File384_Scan2550	controllerType=0 controllerNumber=1 scan=2550	15.2484
02240:2	8	R.SASLHLPK.L			426.75	2	852.494	852.494	0	-0.2	307	Specific	380.14	178.13	178.13	4.75	22	>sp|P01009|A1AT_HUMAN Alpha-1-antitrypsin OS=Homo sapiens GN=SERPINA1 PE=1 SV=3	47	File384_Scan4001	controllerType=0 controllerNumber=1 scan=4001	18.3138
02140:2	8	R.SASLHLPK.L			426.751	2	852.494	852.494	0	0.6	307	Specific	687.19	306.18	306.18	10.86	22	>sp|P01009|A1AT_HUMAN Alpha-1-antitrypsin OS=Homo sapiens GN=SERPINA1 PE=1 SV=3	47	File384_Scan3897	controllerType=0 controllerNumber=1 scan=3897	18.0576
05640:2	8	K.LSITGTYDLK.S			555.806	2	1110.61	1110.6	0	0.9	315	Specific	522.09	262.73	262.73	8.37	22	>sp|P01009|A1AT_HUMAN Alpha-1-antitrypsin OS=Homo sapiens GN=SERPINA1 PE=1 SV=3	47	File384_Scan7777	controllerType=0 controllerNumber=1 scan=7777	27.1869
05529:2	8	K.LSITGTYDLK.S			555.806	2	1110.61	1110.6	0	1	315	Specific	602.04	236.65	236.65	10.65	22	>sp|P01009|A1AT_HUMAN Alpha-1-antitrypsin OS=Homo sapiens GN=SERPINA1 PE=1 SV=3	47	File384_Scan7657	controllerType=0 controllerNumber=1 scan=7657	26.9031
06496:2	8	K.SVLGQLGITK.V			508.311	2	1015.62	1015.61	0	0.6	325	Specific	446.9	215.82	215.82	7.79	22	>sp|P01009|A1AT_HUMAN Alpha-1-antitrypsin OS=Homo sapiens GN=SERPINA1 PE=1 SV=3	47	File384_Scan8681	controllerType=0 controllerNumber=1 scan=8681	29.2353
06387:2	8	K.SVLGQLGITK.V			508.311	2	1015.61	1015.61	0	-0.7	325	Specific	511.68	173.58	173.58	7.7	22	>sp|P01009|A1AT_HUMAN Alpha-1-antitrypsin OS=Homo sapiens GN=SERPINA1 PE=1 SV=3	47	File384_Scan8567	controllerType=0 controllerNumber=1 scan=8567	28.9917
06217:2	8	K.VFSNGADLSGVTEEAPLK.L			917.466	2	1833.92	1833.92	0	0.8	335	Specific	684.6	526.67	526.67	14.22	22	>sp|P01009|A1AT_HUMAN Alpha-1-antitrypsin OS=Homo sapiens GN=SERPINA1 PE=1 SV=3	47	File384_Scan8389	controllerType=0 controllerNumber=1 scan=8389	28.6093
03685:2	8	K.AVLTIDEK.G			444.756	2	888.504	888.504	0	0.5	360	Specific	382.6	118.06	118.06	5.48	22	>sp|P01009|A1AT_HUMAN Alpha-1-antitrypsin OS=Homo sapiens GN=SERPINA1 PE=1 SV=3	47	File384_Scan5522	controllerType=0 controllerNumber=1 scan=5522	21.7099
03576:2	8	K.AVLTIDEK.G			444.755	2	888.503	888.504	0	-0.5	360	Specific	444.86	105.31	105.31	4.98	22	>sp|P01009|A1AT_HUMAN Alpha-1-antitrypsin OS=Homo sapiens GN=SERPINA1 PE=1 SV=3	47	File384_Scan5403	controllerType=0 controllerNumber=1 scan=5403	21.4647
10454:3	8	K.GTEAAGAM[+15.995]FLEAIPM[+15.995]SIPPEVK.F		M[+16]*2	764.382	3	2291.13	2291.13	0	0.8	368	Specific	80.72	80.72	80.72	2.88	22	>sp|P01009|A1AT_HUMAN Alpha-1-antitrypsin OS=Homo sapiens GN=SERPINA1 PE=1 SV=3	47	File384_Scan12857	controllerType=0 controllerNumber=1 scan=12857	37.8463
10344:2	8	K.GTEAAGAM[+15.995]FLEAIPM[+15.995]SIPPEVK.F		M[+16]*2	1146.07	2	2291.13	2291.13	0	0.6	368	Specific	282.67	282.67	282.67	8.18	22	>sp|P01009|A1AT_HUMAN Alpha-1-antitrypsin OS=Homo sapiens GN=SERPINA1 PE=1 SV=3	47	File384_Scan12742	controllerType=0 controllerNumber=1 scan=12742	37.6153
10030:2	8	K.GTEAAGAM[+15.995]FLEAIPM[+15.995]SIPPEVK.F		M[+16]*2	1146.07	2	2291.13	2291.13	0	1	368	Specific	306.65	270.14	270.14	8.27	22	>sp|P01009|A1AT_HUMAN Alpha-1-antitrypsin OS=Homo sapiens GN=SERPINA1 PE=1 SV=3	47	File384_Scan12406	controllerType=0 controllerNumber=1 scan=12406	36.924
10242:2	8	K.GTEAAGAM[+15.995]FLEAIPM[+15.995]SIPPEVK.F		M[+16]*2	1146.07	2	2291.13	2291.13	0	0.9	368	Specific	497.17	439.77	439.77	10.66	22	>sp|P01009|A1AT_HUMAN Alpha-1-antitrypsin OS=Homo sapiens GN=SERPINA1 PE=1 SV=3	47	File384_Scan12633	controllerType=0 controllerNumber=1 scan=12633	37.3941
10342:3	8	K.GTEAAGAM[+15.995]FLEAIPM[+15.995]SIPPEVK.F		M[+16]*2	764.382	3	2291.13	2291.13	0	0.4	368	Specific	513.85	513.85	513.85	10.91	22	>sp|P01009|A1AT_HUMAN Alpha-1-antitrypsin OS=Homo sapiens GN=SERPINA1 PE=1 SV=3	47	File384_Scan12740	controllerType=0 controllerNumber=1 scan=12740	37.6118
10026:3	8	K.GTEAAGAM[+15.995]FLEAIPM[+15.995]SIPPEVK.F		M[+16]*2	764.381	3	2291.13	2291.13	0	0	368	Specific	519.09	519.09	519.09	10.69	22	>sp|P01009|A1AT_HUMAN Alpha-1-antitrypsin OS=Homo sapiens GN=SERPINA1 PE=1 SV=3	47	File384_Scan12402	controllerType=0 controllerNumber=1 scan=12402	36.9171
10142:2	8	K.GTEAAGAM[+15.995]FLEAIPM[+15.995]SIPPEVK.F		M[+16]*2	1146.07	2	2291.13	2291.13	0	1.1	368	Specific	585.93	510.86	510.86	12.47	22	>sp|P01009|A1AT_HUMAN Alpha-1-antitrypsin OS=Homo sapiens GN=SERPINA1 PE=1 SV=3	47	File384_Scan12524	controllerType=0 controllerNumber=1 scan=12524	37.1667
10141:3	8	K.GTEAAGAM[+15.995]FLEAIPM[+15.995]SIPPEVK.F		M[+16]*2	764.382	3	2291.13	2291.13	0	1.3	368	Specific	717.28	663.09	663.09	15.56	22	>sp|P01009|A1AT_HUMAN Alpha-1-antitrypsin OS=Homo sapiens GN=SERPINA1 PE=1 SV=3	47	File384_Scan12523	controllerType=0 controllerNumber=1 scan=12523	37.1623
10243:3	8	K.GTEAAGAM[+15.995]FLEAIPM[+15.995]SIPPEVK.F		M[+16]*2	764.382	3	2291.13	2291.13	0	0.8	368	Specific	720.54	681.31	681.31	15.41	22	>sp|P01009|A1AT_HUMAN Alpha-1-antitrypsin OS=Homo sapiens GN=SERPINA1 PE=1 SV=3	47	File384_Scan12634	controllerType=0 controllerNumber=1 scan=12634	37.3985
08306:2	8	K.FNKPFVFLM[+15.995]IEQNTK.S		M[+16]	936.484	2	1871.96	1871.97	0	-6.6	390	Specific	151.14	47.67	47.67	0.05	22	>sp|P01009|A1AT_HUMAN Alpha-1-antitrypsin OS=Homo sapiens GN=SERPINA1 PE=1 SV=3	47	File384_Scan10581	controllerType=0 controllerNumber=1 scan=10581	33.1261
08394:3	8	K.FNKPFVFLM[+15.995]IEQNTK.S		M[+16]	624.663	3	1871.97	1871.97	0	1	390	Specific	293.76	263.22	263.22	5.9	22	>sp|P01009|A1AT_HUMAN Alpha-1-antitrypsin OS=Homo sapiens GN=SERPINA1 PE=1 SV=3	47	File384_Scan10673	controllerType=0 controllerNumber=1 scan=10673	33.3056
08263:3	8	K.FNKPFVFLM[+15.995]IEQNTK.S		M[+16]	624.661	3	1871.97	1871.97	0	-1.9	390	Specific	427.65	390.48	390.48	8.13	22	>sp|P01009|A1AT_HUMAN Alpha-1-antitrypsin OS=Homo sapiens GN=SERPINA1 PE=1 SV=3	47	File384_Scan10536	controllerType=0 controllerNumber=1 scan=10536	33.0401
01476:2	9	K.EIQNAVNGVK.Q			536.292	2	1071.58	1071.58	0	-1.8	45	Specific	585.83	255.58	255.58	9.27	20	>sp|P10909|CLUS_HUMAN Clusterin OS=Homo sapiens GN=CLU PE=1 SV=1	3506	File384_Scan3198	controllerType=0 controllerNumber=1 scan=3198	16.6051
04293:3	9	R.KTLLSNLEEAK.K			415.907	3	1245.71	1245.7	0	0.2	68	Specific	615.18	402.33	402.33	12.42	20	>sp|P10909|CLUS_HUMAN Clusterin OS=Homo sapiens GN=CLU PE=1 SV=1	3506	File384_Scan6315	controllerType=0 controllerNumber=1 scan=6315	23.6166
04296:2	9	R.KTLLSNLEEAK.K			623.356	2	1245.71	1245.7	0	0.5	68	Specific	853.93	505.27	505.27	16.86	20	>sp|P10909|CLUS_HUMAN Clusterin OS=Homo sapiens GN=CLU PE=1 SV=1	3506	File384_Scan6318	controllerType=0 controllerNumber=1 scan=6318	23.6236
03391:3	9	R.KTLLSNLEEAKK.K			458.605	3	1373.8	1373.8	0	0.1	68	Specific	520.41	474.21	474.21	8.94	20	>sp|P10909|CLUS_HUMAN Clusterin OS=Homo sapiens GN=CLU PE=1 SV=1	3506	File384_Scan5203	controllerType=0 controllerNumber=1 scan=5203	21.0162
03273:3	9	R.KTLLSNLEEAKK.K			458.606	3	1373.8	1373.8	0	1.5	68	Specific	653.86	504.88	504.88	12.52	20	>sp|P10909|CLUS_HUMAN Clusterin OS=Homo sapiens GN=CLU PE=1 SV=1	3506	File384_Scan5080	controllerType=0 controllerNumber=1 scan=5080	20.7593
03165:3	9	R.KTLLSNLEEAKK.K			458.604	3	1373.8	1373.8	0	-1.3	68	Specific	761.57	595.33	595.33	13.92	20	>sp|P10909|CLUS_HUMAN Clusterin OS=Homo sapiens GN=CLU PE=1 SV=1	3506	File384_Scan4967	controllerType=0 controllerNumber=1 scan=4967	20.5312
03058:3	9	R.KTLLSNLEEAKK.K			458.605	3	1373.8	1373.8	0	0.5	68	Specific	821.01	622.92	622.92	15.38	20	>sp|P10909|CLUS_HUMAN Clusterin OS=Homo sapiens GN=CLU PE=1 SV=1	3506	File384_Scan4855	controllerType=0 controllerNumber=1 scan=4855	20.2757
06103:2	9	K.TLLSNLEEAK.K			559.309	2	1117.61	1117.61	0	1	69	Specific	180.91	31.78	31.78	1.39	20	>sp|P10909|CLUS_HUMAN Clusterin OS=Homo sapiens GN=CLU PE=1 SV=1	3506	File384_Scan8269	controllerType=0 controllerNumber=1 scan=8269	28.3467
05973:2	9	K.TLLSNLEEAK.K			559.309	2	1117.61	1117.61	0	0.7	69	Specific	638.6	375.6	375.6	11.22	20	>sp|P10909|CLUS_HUMAN Clusterin OS=Homo sapiens GN=CLU PE=1 SV=1	3506	File384_Scan8134	controllerType=0 controllerNumber=1 scan=8134	28.0481
04548:3	9	K.TLLSNLEEAKK.K			415.906	3	1245.7	1245.7	0	-0.3	69	Specific	345.98	229.2	229.2	5.65	20	>sp|P10909|CLUS_HUMAN Clusterin OS=Homo sapiens GN=CLU PE=1 SV=1	3506	File384_Scan6623	controllerType=0 controllerNumber=1 scan=6623	24.3912
04461:2	9	K.TLLSNLEEAKK.K			623.357	2	1245.71	1245.7	0	1.5	69	Specific	451.39	217.49	217.49	6.66	20	>sp|P10909|CLUS_HUMAN Clusterin OS=Homo sapiens GN=CLU PE=1 SV=1	3506	File384_Scan6524	controllerType=0 controllerNumber=1 scan=6524	24.1524
04441:3	9	K.TLLSNLEEAKK.K			415.906	3	1245.7	1245.7	0	-0.4	69	Specific	733.59	430.59	430.59	13.53	20	>sp|P10909|CLUS_HUMAN Clusterin OS=Homo sapiens GN=CLU PE=1 SV=1	3506	File384_Scan6504	controllerType=0 controllerNumber=1 scan=6504	24.1007
00441:3	9	K.KKEDALN[+2861.000]ETR.E	HexNAc(5)Hex(6)NeuAc(3)	N[+2861]	1355.55	3	4064.64	4064.63	0	0.9	80	Specific	287.44	94.49	94.49	4.62	20	>sp|P10909|CLUS_HUMAN Clusterin OS=Homo sapiens GN=CLU PE=1 SV=1	3506	File384_Scan2116	controllerType=0 controllerNumber=1 scan=2116	14.2445
00807:2	9	K.EDALNETR.E			474.225	2	947.443	947.443	0	0.2	82	Specific	88.27	1.2	1.2	0.51	20	>sp|P10909|CLUS_HUMAN Clusterin OS=Homo sapiens GN=CLU PE=1 SV=1	3506	File384_Scan2497	controllerType=0 controllerNumber=1 scan=2497	15.1379
01293:3	9	K.EDALN[+2861.000]ETR.E	HexNAc(5)Hex(6)NeuAc(3)	N[+2861]	1270.15	3	3808.45	3808.44	0	2	82	Specific	179.7	6.59	6.59	2.69	20	>sp|P10909|CLUS_HUMAN Clusterin OS=Homo sapiens GN=CLU PE=1 SV=1	3506	File384_Scan3006	controllerType=0 controllerNumber=1 scan=3006	16.215
04069:2	9	R.IDSLLENDR.Q			537.775	2	1074.54	1074.54	0	0.7	159	Specific	544.25	286.23	286.23	8.5	20	>sp|P10909|CLUS_HUMAN Clusterin OS=Homo sapiens GN=CLU PE=1 SV=1	3506	File384_Scan6013	controllerType=0 controllerNumber=1 scan=6013	22.8821
03990:2	9	R.IDSLLENDR.Q			537.775	2	1074.54	1074.54	0	0.6	159	Specific	612.6	260.65	260.65	10.8	20	>sp|P10909|CLUS_HUMAN Clusterin OS=Homo sapiens GN=CLU PE=1 SV=1	3506	File384_Scan5910	controllerType=0 controllerNumber=1 scan=5910	22.6177
02205:3	9	R.QQTHM[+15.995]LDVM[+15.995]QDHFSR.A		M[+16]*2	635.618	3	1904.84	1904.84	0	1.1	168	Specific	6.48	6.48	6.48	0.54	20	>sp|P10909|CLUS_HUMAN Clusterin OS=Homo sapiens GN=CLU PE=1 SV=1	3506	File384_Scan3964	controllerType=0 controllerNumber=1 scan=3964	18.2148
02066:3	9	R.QQTHM[+15.995]LDVM[+15.995]QDHFSR.A		M[+16]*2	635.618	3	1904.84	1904.84	0	1.2	168	Specific	198.42	198.42	198.42	2.92	20	>sp|P10909|CLUS_HUMAN Clusterin OS=Homo sapiens GN=CLU PE=1 SV=1	3506	File384_Scan3819	controllerType=0 controllerNumber=1 scan=3819	17.8889
02270:4	9	R.QQTHM[+15.995]LDVM[+15.995]QDHFSR.A		M[+16]*2	476.965	4	1904.84	1904.84	0	-0.4	168	Specific	291.18	291.18	291.18	5.06	20	>sp|P10909|CLUS_HUMAN Clusterin OS=Homo sapiens GN=CLU PE=1 SV=1	3506	File384_Scan4032	controllerType=0 controllerNumber=1 scan=4032	18.382
02795:4	9	R.QQTHM[+15.995]LDVM[+15.995]QDHFSR.A		M[+16]*2	476.965	4	1904.84	1904.84	0	-0.3	168	Specific	311.06	238.39	238.39	4.99	20	>sp|P10909|CLUS_HUMAN Clusterin OS=Homo sapiens GN=CLU PE=1 SV=1	3506	File384_Scan4580	controllerType=0 controllerNumber=1 scan=4580	19.6375
02493:4	9	R.QQTHM[+15.995]LDVM[+15.995]QDHFSR.A		M[+16]*2	476.965	4	1904.84	1904.84	0	-0.1	168	Specific	320.83	320.83	320.83	5.86	20	>sp|P10909|CLUS_HUMAN Clusterin OS=Homo sapiens GN=CLU PE=1 SV=1	3506	File384_Scan4264	controllerType=0 controllerNumber=1 scan=4264	18.9284
01954:3	9	R.QQTHM[+15.995]LDVM[+15.995]QDHFSR.A		M[+16]*2	635.617	3	1904.84	1904.84	0	0	168	Specific	325.09	325.09	325.09	6.14	20	>sp|P10909|CLUS_HUMAN Clusterin OS=Homo sapiens GN=CLU PE=1 SV=1	3506	File384_Scan3702	controllerType=0 controllerNumber=1 scan=3702	17.6327
01840:3	9	R.QQTHM[+15.995]LDVM[+15.995]QDHFSR.A		M[+16]*2	635.618	3	1904.84	1904.84	0	1.3	168	Specific	355.59	355.59	355.59	7.37	20	>sp|P10909|CLUS_HUMAN Clusterin OS=Homo sapiens GN=CLU PE=1 SV=1	3506	File384_Scan3582	controllerType=0 controllerNumber=1 scan=3582	17.381
01642:3	9	R.QQTHM[+15.995]LDVM[+15.995]QDHFSR.A		M[+16]*2	635.618	3	1904.84	1904.84	0	0.6	168	Specific	409.67	409.67	409.67	9.08	20	>sp|P10909|CLUS_HUMAN Clusterin OS=Homo sapiens GN=CLU PE=1 SV=1	3506	File384_Scan3374	controllerType=0 controllerNumber=1 scan=3374	16.9595
01445:4	9	R.QQTHM[+15.995]LDVM[+15.995]QDHFSR.A		M[+16]*2	476.965	4	1904.84	1904.84	0	0.1	168	Specific	431.18	356.6	356.6	6.86	20	>sp|P10909|CLUS_HUMAN Clusterin OS=Homo sapiens GN=CLU PE=1 SV=1	3506	File384_Scan3165	controllerType=0 controllerNumber=1 scan=3165	16.5367
02617:4	9	R.QQTHM[+15.995]LDVM[+15.995]QDHFSR.A		M[+16]*2	476.965	4	1904.84	1904.84	0	-0.4	168	Specific	441.76	398.75	398.75	8.56	20	>sp|P10909|CLUS_HUMAN Clusterin OS=Homo sapiens GN=CLU PE=1 SV=1	3506	File384_Scan4394	controllerType=0 controllerNumber=1 scan=4394	19.197
02380:4	9	R.QQTHM[+15.995]LDVM[+15.995]QDHFSR.A		M[+16]*2	476.965	4	1904.84	1904.84	0	0.1	168	Specific	464.35	408.01	408.01	9.01	20	>sp|P10909|CLUS_HUMAN Clusterin OS=Homo sapiens GN=CLU PE=1 SV=1	3506	File384_Scan4146	controllerType=0 controllerNumber=1 scan=4146	18.6664
02151:4	9	R.QQTHM[+15.995]LDVM[+15.995]QDHFSR.A		M[+16]*2	476.965	4	1904.84	1904.84	0	0.5	168	Specific	509.09	439.54	439.54	9.9	20	>sp|P10909|CLUS_HUMAN Clusterin OS=Homo sapiens GN=CLU PE=1 SV=1	3506	File384_Scan3908	controllerType=0 controllerNumber=1 scan=3908	18.0797
01993:4	9	R.QQTHM[+15.995]LDVM[+15.995]QDHFSR.A		M[+16]*2	476.965	4	1904.84	1904.84	0	0.5	168	Specific	537.63	457.04	457.04	9.07	20	>sp|P10909|CLUS_HUMAN Clusterin OS=Homo sapiens GN=CLU PE=1 SV=1	3506	File384_Scan3743	controllerType=0 controllerNumber=1 scan=3743	17.7233
01781:4	9	R.QQTHM[+15.995]LDVM[+15.995]QDHFSR.A		M[+16]*2	476.965	4	1904.84	1904.84	0	0.1	168	Specific	540.31	503.69	503.69	10.12	20	>sp|P10909|CLUS_HUMAN Clusterin OS=Homo sapiens GN=CLU PE=1 SV=1	3506	File384_Scan3520	controllerType=0 controllerNumber=1 scan=3520	17.2548
01660:4	9	R.QQTHM[+15.995]LDVM[+15.995]QDHFSR.A		M[+16]*2	476.965	4	1904.84	1904.84	0	-0.1	168	Specific	575.03	493.12	493.12	10.07	20	>sp|P10909|CLUS_HUMAN Clusterin OS=Homo sapiens GN=CLU PE=1 SV=1	3506	File384_Scan3393	controllerType=0 controllerNumber=1 scan=3393	16.9995
01893:4	9	R.QQTHM[+15.995]LDVM[+15.995]QDHFSR.A		M[+16]*2	476.965	4	1904.84	1904.84	0	0.3	168	Specific	604.72	547.2	547.2	12.4	20	>sp|P10909|CLUS_HUMAN Clusterin OS=Homo sapiens GN=CLU PE=1 SV=1	3506	File384_Scan3638	controllerType=0 controllerNumber=1 scan=3638	17.5
01548:4	9	R.QQTHM[+15.995]LDVM[+15.995]QDHFSR.A		M[+16]*2	476.965	4	1904.84	1904.84	0	0.3	168	Specific	672.08	613.27	613.27	13.4	20	>sp|P10909|CLUS_HUMAN Clusterin OS=Homo sapiens GN=CLU PE=1 SV=1	3506	File384_Scan3276	controllerType=0 controllerNumber=1 scan=3276	16.7603
01512:3	9	R.QQTHM[+15.995]LDVM[+15.995]QDHFSR.A		M[+16]*2	635.618	3	1904.84	1904.84	0	0.8	168	Specific	725.21	670.29	670.29	13.84	20	>sp|P10909|CLUS_HUMAN Clusterin OS=Homo sapiens GN=CLU PE=1 SV=1	3506	File384_Scan3238	controllerType=0 controllerNumber=1 scan=3238	16.6847
11976:2	9	R.ASSIIDELFQDR.F			697.353	2	1393.7	1393.7	0	2.2	183	Specific	102.67	65.1	65.1	1.84	20	>sp|P10909|CLUS_HUMAN Clusterin OS=Homo sapiens GN=CLU PE=1 SV=1	3506	File384_Scan14540	controllerType=0 controllerNumber=1 scan=14540	41.5921
11660:2	9	R.ASSIIDELFQDR.F			697.352	2	1393.7	1393.7	0	0.7	183	Specific	160.68	128.74	128.74	3.39	20	>sp|P10909|CLUS_HUMAN Clusterin OS=Homo sapiens GN=CLU PE=1 SV=1	3506	File384_Scan14164	controllerType=0 controllerNumber=1 scan=14164	40.7084
11545:2	9	R.ASSIIDELFQDR.F			697.352	2	1393.7	1393.7	0	1.1	183	Specific	369.92	164.24	164.24	6.5	20	>sp|P10909|CLUS_HUMAN Clusterin OS=Homo sapiens GN=CLU PE=1 SV=1	3506	File384_Scan14017	controllerType=0 controllerNumber=1 scan=14017	40.3125
11209:2	9	R.ASSIIDELFQDR.F			697.352	2	1393.7	1393.7	0	0.2	183	Specific	415.31	234.12	234.12	8.02	20	>sp|P10909|CLUS_HUMAN Clusterin OS=Homo sapiens GN=CLU PE=1 SV=1	3506	File384_Scan13651	controllerType=0 controllerNumber=1 scan=13651	39.4494
10167:2	9	R.ASSIIDELFQDR.F			697.355	2	1393.7	1393.7	0	4.3	183	Specific	454.36	191.77	191.77	6.39	20	>sp|P10909|CLUS_HUMAN Clusterin OS=Homo sapiens GN=CLU PE=1 SV=1	3506	File384_Scan12552	controllerType=0 controllerNumber=1 scan=12552	37.2269
11095:2	9	R.ASSIIDELFQDR.F			697.352	2	1393.7	1393.7	0	0.8	183	Specific	471.01	255.64	255.64	8.15	20	>sp|P10909|CLUS_HUMAN Clusterin OS=Homo sapiens GN=CLU PE=1 SV=1	3506	File384_Scan13532	controllerType=0 controllerNumber=1 scan=13532	39.1839
11325:2	9	R.ASSIIDELFQDR.F			697.351	2	1393.69	1393.7	0	-0.7	183	Specific	471.61	235.04	235.04	7.85	20	>sp|P10909|CLUS_HUMAN Clusterin OS=Homo sapiens GN=CLU PE=1 SV=1	3506	File384_Scan13772	controllerType=0 controllerNumber=1 scan=13772	39.706
10999:2	9	R.ASSIIDELFQDR.F			697.352	2	1393.7	1393.7	0	1.2	183	Specific	522.45	301.1	301.1	8.68	20	>sp|P10909|CLUS_HUMAN Clusterin OS=Homo sapiens GN=CLU PE=1 SV=1	3506	File384_Scan13431	controllerType=0 controllerNumber=1 scan=13431	38.9853
10529:2	9	R.ASSIIDELFQDR.F			697.352	2	1393.7	1393.7	0	0.9	183	Specific	599.04	305.39	305.39	9.97	20	>sp|P10909|CLUS_HUMAN Clusterin OS=Homo sapiens GN=CLU PE=1 SV=1	3506	File384_Scan12936	controllerType=0 controllerNumber=1 scan=12936	38.0068
10878:2	9	R.ASSIIDELFQDR.F			697.352	2	1393.7	1393.7	0	0.7	183	Specific	626.36	335.31	335.31	11.12	20	>sp|P10909|CLUS_HUMAN Clusterin OS=Homo sapiens GN=CLU PE=1 SV=1	3506	File384_Scan13304	controllerType=0 controllerNumber=1 scan=13304	38.7409
12171:2	9	R.ASSIIDELFQDR.F			697.352	2	1393.7	1393.7	0	0.9	183	Specific	674.15	334.85	334.85	12.12	20	>sp|P10909|CLUS_HUMAN Clusterin OS=Homo sapiens GN=CLU PE=1 SV=1	3506	File384_Scan14785	controllerType=0 controllerNumber=1 scan=14785	42.1212
10657:2	9	R.ASSIIDELFQDR.F			697.352	2	1393.7	1393.7	0	0.4	183	Specific	694.94	345.74	345.74	12.15	20	>sp|P10909|CLUS_HUMAN Clusterin OS=Homo sapiens GN=CLU PE=1 SV=1	3506	File384_Scan13070	controllerType=0 controllerNumber=1 scan=13070	38.2694
10769:2	9	R.ASSIIDELFQDR.F			697.352	2	1393.7	1393.7	0	1.4	183	Specific	724.79	368.13	368.13	13.5	20	>sp|P10909|CLUS_HUMAN Clusterin OS=Homo sapiens GN=CLU PE=1 SV=1	3506	File384_Scan13188	controllerType=0 controllerNumber=1 scan=13188	38.5066
03641:2	9	R.EILSVDC[+57.021]STNNPSQAK.L		C[+57]	881.917	2	1762.83	1762.83	0	-0.9	307	Specific	545.02	488.04	488.04	9.94	20	>sp|P10909|CLUS_HUMAN Clusterin OS=Homo sapiens GN=CLU PE=1 SV=1	3506	File384_Scan5471	controllerType=0 controllerNumber=1 scan=5471	21.6008
03531:2	9	R.EILSVDC[+57.021]STNNPSQAK.L		C[+57]	881.918	2	1762.83	1762.83	0	1	307	Specific	619.12	504.44	504.44	12.67	20	>sp|P10909|CLUS_HUMAN Clusterin OS=Homo sapiens GN=CLU PE=1 SV=1	3506	File384_Scan5354	controllerType=0 controllerNumber=1 scan=5354	21.3556
03514:2	9	R.EILSVDC[+57.021]STNNPSQAK.L		C[+57]	881.918	2	1762.83	1762.83	0	0.5	307	Specific	639.22	505.59	505.59	12.67	20	>sp|P10909|CLUS_HUMAN Clusterin OS=Homo sapiens GN=CLU PE=1 SV=1	3506	File384_Scan5332	controllerType=0 controllerNumber=1 scan=5332	21.3083
03233:3	9	R.RELDESLQVAER.L			482.25	3	1444.73	1444.74	0	-3.6	325	Specific	370.54	237.25	237.25	5.24	20	>sp|P10909|CLUS_HUMAN Clusterin OS=Homo sapiens GN=CLU PE=1 SV=1	3506	File384_Scan5038	controllerType=0 controllerNumber=1 scan=5038	20.6698
03128:3	9	R.RELDESLQVAER.L			482.251	3	1444.74	1444.74	0	0.3	325	Specific	386.46	307.6	307.6	6.83	20	>sp|P10909|CLUS_HUMAN Clusterin OS=Homo sapiens GN=CLU PE=1 SV=1	3506	File384_Scan4928	controllerType=0 controllerNumber=1 scan=4928	20.4463
03013:3	9	R.RELDESLQVAER.L			482.251	3	1444.74	1444.74	0	0	325	Specific	574.46	389.37	389.37	10.27	20	>sp|P10909|CLUS_HUMAN Clusterin OS=Homo sapiens GN=CLU PE=1 SV=1	3506	File384_Scan4808	controllerType=0 controllerNumber=1 scan=4808	20.171
04223:2	9	R.ELDESLQVAER.L			644.824	2	1288.64	1288.64	0	1.7	326	Specific	169.92	29.49	29.49	1.64	20	>sp|P10909|CLUS_HUMAN Clusterin OS=Homo sapiens GN=CLU PE=1 SV=1	3506	File384_Scan6227	controllerType=0 controllerNumber=1 scan=6227	23.4097
04143:2	9	R.ELDESLQVAER.L			644.823	2	1288.64	1288.64	0	0.6	326	Specific	575.23	339.16	339.16	8.83	20	>sp|P10909|CLUS_HUMAN Clusterin OS=Homo sapiens GN=CLU PE=1 SV=1	3506	File384_Scan6115	controllerType=0 controllerNumber=1 scan=6115	23.1399
04065:2	9	R.ELDESLQVAER.L			644.823	2	1288.64	1288.64	0	1.3	326	Specific	680.21	375.6	375.6	12.31	20	>sp|P10909|CLUS_HUMAN Clusterin OS=Homo sapiens GN=CLU PE=1 SV=1	3506	File384_Scan6009	controllerType=0 controllerNumber=1 scan=6009	22.8712
02045:2	9	R.KYNELLK.S			454.266	2	907.525	907.525	0	0.2	340	Specific	315.36	1.2	1.2	1.82	20	>sp|P10909|CLUS_HUMAN Clusterin OS=Homo sapiens GN=CLU PE=1 SV=1	3506	File384_Scan3797	controllerType=0 controllerNumber=1 scan=3797	17.8342
02157:2	9	R.KYNELLK.S			454.267	2	907.526	907.525	0	1.4	340	Specific	327.35	19.68	19.68	2.25	20	>sp|P10909|CLUS_HUMAN Clusterin OS=Homo sapiens GN=CLU PE=1 SV=1	3506	File384_Scan3914	controllerType=0 controllerNumber=1 scan=3914	18.0903
01896:2	9	R.KYNELLK.S			454.266	2	907.525	907.525	0	0.2	340	Specific	395.45	43.23	43.23	2.89	20	>sp|P10909|CLUS_HUMAN Clusterin OS=Homo sapiens GN=CLU PE=1 SV=1	3506	File384_Scan3641	controllerType=0 controllerNumber=1 scan=3641	17.506
01776:2	9	R.KYNELLK.S			454.266	2	907.525	907.525	0	0	340	Specific	483.18	35.2	35.2	2.92	20	>sp|P10909|CLUS_HUMAN Clusterin OS=Homo sapiens GN=CLU PE=1 SV=1	3506	File384_Scan3515	controllerType=0 controllerNumber=1 scan=3515	17.2464
01669:2	9	R.KYNELLK.S			454.266	2	907.525	907.525	0	0	340	Specific	540.41	50.78	50.78	3.75	20	>sp|P10909|CLUS_HUMAN Clusterin OS=Homo sapiens GN=CLU PE=1 SV=1	3506	File384_Scan3403	controllerType=0 controllerNumber=1 scan=3403	17.0195
01570:2	9	R.KYNELLK.S			454.266	2	907.525	907.525	0	0.3	340	Specific	550.09	62.22	62.22	4.7	20	>sp|P10909|CLUS_HUMAN Clusterin OS=Homo sapiens GN=CLU PE=1 SV=1	3506	File384_Scan3299	controllerType=0 controllerNumber=1 scan=3299	16.8061
06266:3	9	R.LAN[+2861.000]LTQGEDQYYLR.V	HexNAc(5)Hex(6)NeuAc(3)	N[+2861]	1515.62	3	4544.84	4544.83	0	0.6	372	Specific	259.07	205.21	205.21	6.77	20	>sp|P10909|CLUS_HUMAN Clusterin OS=Homo sapiens GN=CLU PE=1 SV=1	3506	File384_Scan8440	controllerType=0 controllerNumber=1 scan=8440	28.7216
06268:3	9	R.LAN[+2861.000]LTQGEDQYYLR.V	HexNAc(5)Hex(6)NeuAc(3)	N[+2861]	1515.62	3	4544.84	4544.83	0	0.6	372	Specific	527.24	364.1	364.1	8.82	20	>sp|P10909|CLUS_HUMAN Clusterin OS=Homo sapiens GN=CLU PE=1 SV=1	3506	File384_Scan8442	controllerType=0 controllerNumber=1 scan=8442	28.7277
05863:3	9	R.LAN[+2204.772]LTQGEDQYYLR.V	HexNAc(4)Hex(5)NeuAc(2)	N[+2205]	1296.87	3	3888.61	3888.61	0	0.8	372	Specific	714.67	515.21	515.21	14.51	20	>sp|P10909|CLUS_HUMAN Clusterin OS=Homo sapiens GN=CLU PE=1 SV=1	3506	File384_Scan8019	controllerType=0 controllerNumber=1 scan=8019	27.7767
05865:3	9	R.LAN[+2204.772]LTQGEDQYYLR.V	HexNAc(4)Hex(5)NeuAc(2)	N[+2205]	1296.87	3	3888.61	3888.61	0	0.8	372	Specific	758.36	486.71	486.71	15.51	20	>sp|P10909|CLUS_HUMAN Clusterin OS=Homo sapiens GN=CLU PE=1 SV=1	3506	File384_Scan8021	controllerType=0 controllerNumber=1 scan=8021	27.7834
04622:3	9	R.VTTVASHTSDSDVPSGVTEVVVK.L			772.065	3	2314.18	2314.18	0	1	386	Specific	698.11	698.11	698.11	13.97	20	>sp|P10909|CLUS_HUMAN Clusterin OS=Homo sapiens GN=CLU PE=1 SV=1	3506	File384_Scan6707	controllerType=0 controllerNumber=1 scan=6707	24.5942
04532:3	9	R.VTTVASHTSDSDVPSGVTEVVVK.L			772.066	3	2314.18	2314.18	0	2.1	386	Specific	803.41	738.7	738.7	16.61	20	>sp|P10909|CLUS_HUMAN Clusterin OS=Homo sapiens GN=CLU PE=1 SV=1	3506	File384_Scan6605	controllerType=0 controllerNumber=1 scan=6605	24.3428
04549:2	9	R.VTTVASHTSDSDVPSGVTEVVVK.L			1157.59	2	2314.18	2314.18	0	0.6	386	Specific	856.15	821.06	821.06	17.41	20	>sp|P10909|CLUS_HUMAN Clusterin OS=Homo sapiens GN=CLU PE=1 SV=1	3506	File384_Scan6624	controllerType=0 controllerNumber=1 scan=6624	24.3927
04551:2	9	R.VTTVASHTSDSDVPSGVTEVVVK.L			1157.59	2	2314.18	2314.18	0	0.6	386	Specific	901.72	685.17	685.17	18.41	20	>sp|P10909|CLUS_HUMAN Clusterin OS=Homo sapiens GN=CLU PE=1 SV=1	3506	File384_Scan6626	controllerType=0 controllerNumber=1 scan=6626	24.3989
10741:2	9	K.LFDSDPITVTVPVEVSR.K			937.5	2	1873.99	1873.99	0	0.8	409	Specific	122.72	122.72	122.72	2.88	20	>sp|P10909|CLUS_HUMAN Clusterin OS=Homo sapiens GN=CLU PE=1 SV=1	3506	File384_Scan13158	controllerType=0 controllerNumber=1 scan=13158	38.4467
10540:2	9	K.LFDSDPITVTVPVEVSR.K			937.501	2	1873.99	1873.99	0	2.3	409	Specific	206.83	167.09	167.09	3.5	20	>sp|P10909|CLUS_HUMAN Clusterin OS=Homo sapiens GN=CLU PE=1 SV=1	3506	File384_Scan12947	controllerType=0 controllerNumber=1 scan=12947	38.0258
09897:2	9	K.LFDSDPITVTVPVEVSR.K			937.499	2	1873.99	1873.99	0	-0.5	409	Specific	217.32	113.96	113.96	2.36	20	>sp|P10909|CLUS_HUMAN Clusterin OS=Homo sapiens GN=CLU PE=1 SV=1	3506	File384_Scan12267	controllerType=0 controllerNumber=1 scan=12267	36.6266
12069:2	9	K.LFDSDPITVTVPVEVSR.K			937.5	2	1873.99	1873.99	0	0.6	409	Specific	219.64	181.03	181.03	4.49	20	>sp|P10909|CLUS_HUMAN Clusterin OS=Homo sapiens GN=CLU PE=1 SV=1	3506	File384_Scan14651	controllerType=0 controllerNumber=1 scan=14651	41.825
09814:2	9	K.LFDSDPITVTVPVEVSR.K			937.498	2	1873.99	1873.99	0	-0.7	409	Specific	253.4	187.08	187.08	4.95	20	>sp|P10909|CLUS_HUMAN Clusterin OS=Homo sapiens GN=CLU PE=1 SV=1	3506	File384_Scan12178	controllerType=0 controllerNumber=1 scan=12178	36.4403
09795:2	9	K.LFDSDPITVTVPVEVSR.K			937.498	2	1873.99	1873.99	0	-0.7	409	Specific	291.11	184.09	184.09	5.37	20	>sp|P10909|CLUS_HUMAN Clusterin OS=Homo sapiens GN=CLU PE=1 SV=1	3506	File384_Scan12158	controllerType=0 controllerNumber=1 scan=12158	36.3961
10002:2	9	K.LFDSDPITVTVPVEVSR.K			937.5	2	1873.99	1873.99	0	0.7	409	Specific	308.47	248.14	248.14	6.01	20	>sp|P10909|CLUS_HUMAN Clusterin OS=Homo sapiens GN=CLU PE=1 SV=1	3506	File384_Scan12377	controllerType=0 controllerNumber=1 scan=12377	36.8683
09687:2	9	K.LFDSDPITVTVPVEVSR.K			937.498	2	1873.99	1873.99	0	-1.3	409	Specific	318.33	220	220	5.43	20	>sp|P10909|CLUS_HUMAN Clusterin OS=Homo sapiens GN=CLU PE=1 SV=1	3506	File384_Scan12041	controllerType=0 controllerNumber=1 scan=12041	36.1471
10104:2	9	K.LFDSDPITVTVPVEVSR.K			937.5	2	1873.99	1873.99	0	0.8	409	Specific	356.08	299.36	299.36	6.76	20	>sp|P10909|CLUS_HUMAN Clusterin OS=Homo sapiens GN=CLU PE=1 SV=1	3506	File384_Scan12484	controllerType=0 controllerNumber=1 scan=12484	37.0821
10234:2	9	K.LFDSDPITVTVPVEVSR.K			937.499	2	1873.99	1873.99	0	-0.1	409	Specific	367.35	288.05	288.05	6.92	20	>sp|P10909|CLUS_HUMAN Clusterin OS=Homo sapiens GN=CLU PE=1 SV=1	3506	File384_Scan12624	controllerType=0 controllerNumber=1 scan=12624	37.3757
01357:2	9	K.FM[+15.995]ETVAEK.A		M[+16]	485.732	2	970.457	970.455	0	1.6	430	Specific	288.63	243.83	243.83	5.04	20	>sp|P10909|CLUS_HUMAN Clusterin OS=Homo sapiens GN=CLU PE=1 SV=1	3506	File384_Scan3073	controllerType=0 controllerNumber=1 scan=3073	16.3489
01226:2	9	K.FM[+15.995]ETVAEK.A		M[+16]	485.731	2	970.455	970.455	0	0.2	430	Specific	405.56	194.06	194.06	5.93	20	>sp|P10909|CLUS_HUMAN Clusterin OS=Homo sapiens GN=CLU PE=1 SV=1	3506	File384_Scan2936	controllerType=0 controllerNumber=1 scan=2936	16.0799
01111:2	9	K.FM[+15.995]ETVAEK.A		M[+16]	485.731	2	970.456	970.455	0	0.6	430	Specific	541.79	206.72	206.72	6.38	20	>sp|P10909|CLUS_HUMAN Clusterin OS=Homo sapiens GN=CLU PE=1 SV=1	3506	File384_Scan2816	controllerType=0 controllerNumber=1 scan=2816	15.8195
12524:2	10	K.GPSVFPLAPSSK.S			593.827	2	1186.65	1186.65	0	0.3	5	Specific	29.74	29.74	29.74	1.61	19	>sp|P01857|IGHG1_HUMAN Immunoglobulin heavy constant gamma 1 OS=Homo sapiens GN=IGHG1 PE=1 SV=1	11942	File384_Scan15210	controllerType=0 controllerNumber=1 scan=15210	43.1522
12343:2	10	K.GPSVFPLAPSSK.S			593.827	2	1186.65	1186.65	0	-0.2	5	Specific	51.94	51.94	51.94	1.79	19	>sp|P01857|IGHG1_HUMAN Immunoglobulin heavy constant gamma 1 OS=Homo sapiens GN=IGHG1 PE=1 SV=1	11942	File384_Scan14989	controllerType=0 controllerNumber=1 scan=14989	42.5776
12494:2	10	K.GPSVFPLAPSSK.S			593.827	2	1186.65	1186.65	0	0.5	5	Specific	57.5	57.5	57.5	1.82	19	>sp|P01857|IGHG1_HUMAN Immunoglobulin heavy constant gamma 1 OS=Homo sapiens GN=IGHG1 PE=1 SV=1	11942	File384_Scan15161	controllerType=0 controllerNumber=1 scan=15161	42.9625
12811:2	10	K.GPSVFPLAPSSK.S			593.827	2	1186.65	1186.65	0	0.1	5	Specific	60.31	60.31	60.31	1.74	19	>sp|P01857|IGHG1_HUMAN Immunoglobulin heavy constant gamma 1 OS=Homo sapiens GN=IGHG1 PE=1 SV=1	11942	File384_Scan15816	controllerType=0 controllerNumber=1 scan=15816	45.9853
12569:2	10	K.GPSVFPLAPSSK.S			593.827	2	1186.65	1186.65	0	0.6	5	Specific	63.73	63.73	63.73	2.19	19	>sp|P01857|IGHG1_HUMAN Immunoglobulin heavy constant gamma 1 OS=Homo sapiens GN=IGHG1 PE=1 SV=1	11942	File384_Scan15305	controllerType=0 controllerNumber=1 scan=15305	43.6056
11090:2	10	K.GPSVFPLAPSSK.S			593.827	2	1186.65	1186.65	0	-0.2	5	Specific	64.38	20.86	20.86	1.36	19	>sp|P01857|IGHG1_HUMAN Immunoglobulin heavy constant gamma 1 OS=Homo sapiens GN=IGHG1 PE=1 SV=1	11942	File384_Scan13526	controllerType=0 controllerNumber=1 scan=13526	39.1688
12760:2	10	K.GPSVFPLAPSSK.S			593.827	2	1186.65	1186.65	0	0.1	5	Specific	77.19	77.19	77.19	2.21	19	>sp|P01857|IGHG1_HUMAN Immunoglobulin heavy constant gamma 1 OS=Homo sapiens GN=IGHG1 PE=1 SV=1	11942	File384_Scan15727	controllerType=0 controllerNumber=1 scan=15727	45.629
13194:2	10	K.GPSVFPLAPSSK.S			593.827	2	1186.65	1186.65	0	0.3	5	Specific	82.75	82.75	82.75	2.26	19	>sp|P01857|IGHG1_HUMAN Immunoglobulin heavy constant gamma 1 OS=Homo sapiens GN=IGHG1 PE=1 SV=1	11942	File384_Scan16323	controllerType=0 controllerNumber=1 scan=16323	47.4832
12907:2	10	K.GPSVFPLAPSSK.S			593.827	2	1186.65	1186.65	0	0.4	5	Specific	92.18	92.18	92.18	2.28	19	>sp|P01857|IGHG1_HUMAN Immunoglobulin heavy constant gamma 1 OS=Homo sapiens GN=IGHG1 PE=1 SV=1	11942	File384_Scan15968	controllerType=0 controllerNumber=1 scan=15968	46.521
12840:2	10	K.GPSVFPLAPSSK.S			593.827	2	1186.65	1186.65	0	0.8	5	Specific	119.1	119.1	119.1	2.9	19	>sp|P01857|IGHG1_HUMAN Immunoglobulin heavy constant gamma 1 OS=Homo sapiens GN=IGHG1 PE=1 SV=1	11942	File384_Scan15865	controllerType=0 controllerNumber=1 scan=15865	46.1755
12949:2	10	K.GPSVFPLAPSSK.S			593.827	2	1186.65	1186.65	0	-0.1	5	Specific	133.75	133.75	133.75	2.9	19	>sp|P01857|IGHG1_HUMAN Immunoglobulin heavy constant gamma 1 OS=Homo sapiens GN=IGHG1 PE=1 SV=1	11942	File384_Scan16027	controllerType=0 controllerNumber=1 scan=16027	46.7107
13745:2	10	K.GPSVFPLAPSSK.S			593.827	2	1186.65	1186.65	0	-0.5	5	Specific	149	100.81	100.81	2.18	19	>sp|P01857|IGHG1_HUMAN Immunoglobulin heavy constant gamma 1 OS=Homo sapiens GN=IGHG1 PE=1 SV=1	11942	File384_Scan16921	controllerType=0 controllerNumber=1 scan=16921	48.7432
12434:2	10	K.GPSVFPLAPSSK.S			593.827	2	1186.65	1186.65	0	0.2	5	Specific	154.4	154.4	154.4	3.92	19	>sp|P01857|IGHG1_HUMAN Immunoglobulin heavy constant gamma 1 OS=Homo sapiens GN=IGHG1 PE=1 SV=1	11942	File384_Scan15088	controllerType=0 controllerNumber=1 scan=15088	42.7795
13140:2	10	K.GPSVFPLAPSSK.S			593.827	2	1186.65	1186.65	0	0.5	5	Specific	159.8	159.8	159.8	3.77	19	>sp|P01857|IGHG1_HUMAN Immunoglobulin heavy constant gamma 1 OS=Homo sapiens GN=IGHG1 PE=1 SV=1	11942	File384_Scan16255	controllerType=0 controllerNumber=1 scan=16255	47.2972
12159:2	10	K.GPSVFPLAPSSK.S			593.827	2	1186.65	1186.65	0	0.7	5	Specific	162.84	162.84	162.84	4.49	19	>sp|P01857|IGHG1_HUMAN Immunoglobulin heavy constant gamma 1 OS=Homo sapiens GN=IGHG1 PE=1 SV=1	11942	File384_Scan14771	controllerType=0 controllerNumber=1 scan=14771	42.0914
12875:2	10	K.GPSVFPLAPSSK.S			593.828	2	1186.65	1186.65	0	1.2	5	Specific	183.71	183.71	183.71	4.65	19	>sp|P01857|IGHG1_HUMAN Immunoglobulin heavy constant gamma 1 OS=Homo sapiens GN=IGHG1 PE=1 SV=1	11942	File384_Scan15918	controllerType=0 controllerNumber=1 scan=15918	46.3472
13090:2	10	K.GPSVFPLAPSSK.S			593.827	2	1186.65	1186.65	0	0.9	5	Specific	190.43	190.43	190.43	4.73	19	>sp|P01857|IGHG1_HUMAN Immunoglobulin heavy constant gamma 1 OS=Homo sapiens GN=IGHG1 PE=1 SV=1	11942	File384_Scan16190	controllerType=0 controllerNumber=1 scan=16190	47.1102
13640:2	10	K.GPSVFPLAPSSK.S			593.827	2	1186.65	1186.65	0	0.1	5	Specific	190.62	151.96	151.96	2.91	19	>sp|P01857|IGHG1_HUMAN Immunoglobulin heavy constant gamma 1 OS=Homo sapiens GN=IGHG1 PE=1 SV=1	11942	File384_Scan16804	controllerType=0 controllerNumber=1 scan=16804	48.4964
12067:2	10	K.GPSVFPLAPSSK.S			593.827	2	1186.65	1186.65	0	0.7	5	Specific	213.82	213.82	213.82	4.86	19	>sp|P01857|IGHG1_HUMAN Immunoglobulin heavy constant gamma 1 OS=Homo sapiens GN=IGHG1 PE=1 SV=1	11942	File384_Scan14649	controllerType=0 controllerNumber=1 scan=14649	41.8219
13421:2	10	K.GPSVFPLAPSSK.S			593.827	2	1186.65	1186.65	0	0.3	5	Specific	220.99	220.99	220.99	5.94	19	>sp|P01857|IGHG1_HUMAN Immunoglobulin heavy constant gamma 1 OS=Homo sapiens GN=IGHG1 PE=1 SV=1	11942	File384_Scan16567	controllerType=0 controllerNumber=1 scan=16567	48.0023
11775:2	10	K.GPSVFPLAPSSK.S			593.827	2	1186.65	1186.65	0	0.8	5	Specific	257.77	257.77	257.77	6.32	19	>sp|P01857|IGHG1_HUMAN Immunoglobulin heavy constant gamma 1 OS=Homo sapiens GN=IGHG1 PE=1 SV=1	11942	File384_Scan14306	controllerType=0 controllerNumber=1 scan=14306	41.0618
13016:2	10	K.GPSVFPLAPSSK.S			593.827	2	1186.65	1186.65	0	0.6	5	Specific	259.07	259.07	259.07	7	19	>sp|P01857|IGHG1_HUMAN Immunoglobulin heavy constant gamma 1 OS=Homo sapiens GN=IGHG1 PE=1 SV=1	11942	File384_Scan16103	controllerType=0 controllerNumber=1 scan=16103	46.8878
13536:2	10	K.GPSVFPLAPSSK.S			593.827	2	1186.65	1186.65	0	0.1	5	Specific	259.14	259.14	259.14	6.32	19	>sp|P01857|IGHG1_HUMAN Immunoglobulin heavy constant gamma 1 OS=Homo sapiens GN=IGHG1 PE=1 SV=1	11942	File384_Scan16690	controllerType=0 controllerNumber=1 scan=16690	48.2579
10642:2	10	K.GPSVFPLAPSSK.S			593.827	2	1186.65	1186.65	0	0.9	5	Specific	270.43	223.67	223.67	6.14	19	>sp|P01857|IGHG1_HUMAN Immunoglobulin heavy constant gamma 1 OS=Homo sapiens GN=IGHG1 PE=1 SV=1	11942	File384_Scan13054	controllerType=0 controllerNumber=1 scan=13054	38.2332
09541:2	10	K.GPSVFPLAPSSK.S			593.827	2	1186.65	1186.65	0	0	5	Specific	276.45	206.92	206.92	5.76	19	>sp|P01857|IGHG1_HUMAN Immunoglobulin heavy constant gamma 1 OS=Homo sapiens GN=IGHG1 PE=1 SV=1	11942	File384_Scan11886	controllerType=0 controllerNumber=1 scan=11886	35.8299
11877:2	10	K.GPSVFPLAPSSK.S			593.827	2	1186.65	1186.65	0	0.9	5	Specific	289.9	289.9	289.9	7.46	19	>sp|P01857|IGHG1_HUMAN Immunoglobulin heavy constant gamma 1 OS=Homo sapiens GN=IGHG1 PE=1 SV=1	11942	File384_Scan14426	controllerType=0 controllerNumber=1 scan=14426	41.3298
09803:2	10	K.GPSVFPLAPSSK.S			593.828	2	1186.65	1186.65	0	1	5	Specific	303.39	250.01	250.01	6.45	19	>sp|P01857|IGHG1_HUMAN Immunoglobulin heavy constant gamma 1 OS=Homo sapiens GN=IGHG1 PE=1 SV=1	11942	File384_Scan12166	controllerType=0 controllerNumber=1 scan=12166	36.4111
11965:2	10	K.GPSVFPLAPSSK.S			593.827	2	1186.65	1186.65	0	0.5	5	Specific	303.98	303.98	303.98	7.58	19	>sp|P01857|IGHG1_HUMAN Immunoglobulin heavy constant gamma 1 OS=Homo sapiens GN=IGHG1 PE=1 SV=1	11942	File384_Scan14523	controllerType=0 controllerNumber=1 scan=14523	41.5536
10056:2	10	K.GPSVFPLAPSSK.S			593.827	2	1186.65	1186.65	0	0.2	5	Specific	349.2	277.59	277.59	6.96	19	>sp|P01857|IGHG1_HUMAN Immunoglobulin heavy constant gamma 1 OS=Homo sapiens GN=IGHG1 PE=1 SV=1	11942	File384_Scan12433	controllerType=0 controllerNumber=1 scan=12433	36.9789
09945:2	10	K.GPSVFPLAPSSK.S			593.827	2	1186.65	1186.65	0	0.4	5	Specific	358.22	286.55	286.55	7.75	19	>sp|P01857|IGHG1_HUMAN Immunoglobulin heavy constant gamma 1 OS=Homo sapiens GN=IGHG1 PE=1 SV=1	11942	File384_Scan12317	controllerType=0 controllerNumber=1 scan=12317	36.7364
07702:2	10	K.GPSVFPLAPSSK.S			593.827	2	1186.65	1186.65	0	0.3	5	Specific	403.93	280.19	280.19	7.37	19	>sp|P01857|IGHG1_HUMAN Immunoglobulin heavy constant gamma 1 OS=Homo sapiens GN=IGHG1 PE=1 SV=1	11942	File384_Scan9947	controllerType=0 controllerNumber=1 scan=9947	31.831
08131:2	10	K.GPSVFPLAPSSK.S			593.827	2	1186.65	1186.65	0	0.7	5	Specific	456.04	357.22	357.22	8.34	19	>sp|P01857|IGHG1_HUMAN Immunoglobulin heavy constant gamma 1 OS=Homo sapiens GN=IGHG1 PE=1 SV=1	11942	File384_Scan10397	controllerType=0 controllerNumber=1 scan=10397	32.7542
08479:2	10	K.GPSVFPLAPSSK.S			593.827	2	1186.65	1186.65	0	0.1	5	Specific	475.81	403.28	403.28	9.9	19	>sp|P01857|IGHG1_HUMAN Immunoglobulin heavy constant gamma 1 OS=Homo sapiens GN=IGHG1 PE=1 SV=1	11942	File384_Scan10763	controllerType=0 controllerNumber=1 scan=10763	33.4799
07435:2	10	K.GPSVFPLAPSSK.S			593.827	2	1186.65	1186.65	0	0.7	5	Specific	476.76	341.86	341.86	8.45	19	>sp|P01857|IGHG1_HUMAN Immunoglobulin heavy constant gamma 1 OS=Homo sapiens GN=IGHG1 PE=1 SV=1	11942	File384_Scan9665	controllerType=0 controllerNumber=1 scan=9665	31.2551
07309:2	10	K.GPSVFPLAPSSK.S			593.827	2	1186.65	1186.65	0	0.6	5	Specific	500.05	440.17	440.17	10.1	19	>sp|P01857|IGHG1_HUMAN Immunoglobulin heavy constant gamma 1 OS=Homo sapiens GN=IGHG1 PE=1 SV=1	11942	File384_Scan9533	controllerType=0 controllerNumber=1 scan=9533	30.99
08023:2	10	K.GPSVFPLAPSSK.S			593.827	2	1186.65	1186.65	0	0.8	5	Specific	505.02	359.11	359.11	8.65	19	>sp|P01857|IGHG1_HUMAN Immunoglobulin heavy constant gamma 1 OS=Homo sapiens GN=IGHG1 PE=1 SV=1	11942	File384_Scan10284	controllerType=0 controllerNumber=1 scan=10284	32.5224
07556:2	10	K.GPSVFPLAPSSK.S			593.827	2	1186.65	1186.65	0	0.5	5	Specific	507.17	387.68	387.68	10.1	19	>sp|P01857|IGHG1_HUMAN Immunoglobulin heavy constant gamma 1 OS=Homo sapiens GN=IGHG1 PE=1 SV=1	11942	File384_Scan9794	controllerType=0 controllerNumber=1 scan=9794	31.5258
07059:2	10	K.GPSVFPLAPSSK.S			593.827	2	1186.65	1186.65	0	0.4	5	Specific	532.61	385.67	385.67	10.17	19	>sp|P01857|IGHG1_HUMAN Immunoglobulin heavy constant gamma 1 OS=Homo sapiens GN=IGHG1 PE=1 SV=1	11942	File384_Scan9271	controllerType=0 controllerNumber=1 scan=9271	30.4467
07884:2	10	K.GPSVFPLAPSSK.S			593.827	2	1186.65	1186.65	0	0.9	5	Specific	541.86	422.86	422.86	10.33	19	>sp|P01857|IGHG1_HUMAN Immunoglobulin heavy constant gamma 1 OS=Homo sapiens GN=IGHG1 PE=1 SV=1	11942	File384_Scan10138	controllerType=0 controllerNumber=1 scan=10138	32.2245
06929:2	10	K.GPSVFPLAPSSK.S			593.827	2	1186.65	1186.65	0	0.6	5	Specific	561.05	430.77	430.77	10.5	19	>sp|P01857|IGHG1_HUMAN Immunoglobulin heavy constant gamma 1 OS=Homo sapiens GN=IGHG1 PE=1 SV=1	11942	File384_Scan9135	controllerType=0 controllerNumber=1 scan=9135	30.1546
07189:2	10	K.GPSVFPLAPSSK.S			593.827	2	1186.65	1186.65	0	-0.8	5	Specific	561.95	410.14	410.14	10.27	19	>sp|P01857|IGHG1_HUMAN Immunoglobulin heavy constant gamma 1 OS=Homo sapiens GN=IGHG1 PE=1 SV=1	11942	File384_Scan9407	controllerType=0 controllerNumber=1 scan=9407	30.7323
06829:2	10	K.GPSVFPLAPSSK.S			593.827	2	1186.65	1186.65	0	0.3	5	Specific	593.97	442.65	442.65	11.61	19	>sp|P01857|IGHG1_HUMAN Immunoglobulin heavy constant gamma 1 OS=Homo sapiens GN=IGHG1 PE=1 SV=1	11942	File384_Scan9030	controllerType=0 controllerNumber=1 scan=9030	29.9374
06619:2	10	K.GPSVFPLAPSSK.S			593.827	2	1186.65	1186.65	0	0.6	5	Specific	607.16	471.41	471.41	12.61	19	>sp|P01857|IGHG1_HUMAN Immunoglobulin heavy constant gamma 1 OS=Homo sapiens GN=IGHG1 PE=1 SV=1	11942	File384_Scan8810	controllerType=0 controllerNumber=1 scan=8810	29.5002
06304:2	10	K.GPSVFPLAPSSK.S			593.827	2	1186.65	1186.65	0	-0.2	5	Specific	613.79	475.79	475.79	12.38	19	>sp|P01857|IGHG1_HUMAN Immunoglobulin heavy constant gamma 1 OS=Homo sapiens GN=IGHG1 PE=1 SV=1	11942	File384_Scan8480	controllerType=0 controllerNumber=1 scan=8480	28.808
06722:2	10	K.GPSVFPLAPSSK.S			593.827	2	1186.65	1186.65	0	0.2	5	Specific	618.41	482.46	482.46	12.61	19	>sp|P01857|IGHG1_HUMAN Immunoglobulin heavy constant gamma 1 OS=Homo sapiens GN=IGHG1 PE=1 SV=1	11942	File384_Scan8918	controllerType=0 controllerNumber=1 scan=8918	29.7177
06515:2	10	K.GPSVFPLAPSSK.S			593.827	2	1186.65	1186.65	0	0.5	5	Specific	634.86	496.61	496.61	12.61	19	>sp|P01857|IGHG1_HUMAN Immunoglobulin heavy constant gamma 1 OS=Homo sapiens GN=IGHG1 PE=1 SV=1	11942	File384_Scan8701	controllerType=0 controllerNumber=1 scan=8701	29.2768
06408:2	10	K.GPSVFPLAPSSK.S			593.828	2	1186.65	1186.65	0	1.2	5	Specific	715.72	602.03	602.03	14.75	19	>sp|P01857|IGHG1_HUMAN Immunoglobulin heavy constant gamma 1 OS=Homo sapiens GN=IGHG1 PE=1 SV=1	11942	File384_Scan8589	controllerType=0 controllerNumber=1 scan=8589	29.0356
07963:3	10	K.GPSVFPLAPSSKSTSGGTAALGC[+57.021]LVK.D		C[+57]	830.441	3	2489.31	2489.31	0	0.9	5	Specific	351.58	306.93	306.93	6.06	19	>sp|P01857|IGHG1_HUMAN Immunoglobulin heavy constant gamma 1 OS=Homo sapiens GN=IGHG1 PE=1 SV=1	11942	File384_Scan10221	controllerType=0 controllerNumber=1 scan=10221	32.3939
05386:2	10	K.STSGGTAALGC[+57.021]LVK.D		C[+57]	661.343	2	1321.68	1321.68	0	1	17	Specific	435.3	249.95	249.95	6.59	19	>sp|P01857|IGHG1_HUMAN Immunoglobulin heavy constant gamma 1 OS=Homo sapiens GN=IGHG1 PE=1 SV=1	11942	File384_Scan7505	controllerType=0 controllerNumber=1 scan=7505	26.548
05137:2	10	K.STSGGTAALGC[+57.021]LVK.D		C[+57]	661.344	2	1321.68	1321.68	0	1.4	17	Specific	537.28	401.93	401.93	10.13	19	>sp|P01857|IGHG1_HUMAN Immunoglobulin heavy constant gamma 1 OS=Homo sapiens GN=IGHG1 PE=1 SV=1	11942	File384_Scan7246	controllerType=0 controllerNumber=1 scan=7246	25.941
05026:2	10	K.STSGGTAALGC[+57.021]LVK.D		C[+57]	661.343	2	1321.68	1321.68	0	1.3	17	Specific	639.68	397.12	397.12	12.56	19	>sp|P01857|IGHG1_HUMAN Immunoglobulin heavy constant gamma 1 OS=Homo sapiens GN=IGHG1 PE=1 SV=1	11942	File384_Scan7131	controllerType=0 controllerNumber=1 scan=7131	25.6445
04921:2	10	K.STSGGTAALGC[+57.021]LVK.D		C[+57]	661.343	2	1321.68	1321.68	0	0.8	17	Specific	649.99	419.35	419.35	12.42	19	>sp|P01857|IGHG1_HUMAN Immunoglobulin heavy constant gamma 1 OS=Homo sapiens GN=IGHG1 PE=1 SV=1	11942	File384_Scan7021	controllerType=0 controllerNumber=1 scan=7021	25.3846
10867:3	10	K.THTC[+57.021]PPC[+57.021]PAPELLGGPSVFLFPPK.P		C[+57]*2	873.775	3	2619.31	2619.31	0	0.7	106	Specific	2.21	2.21	2.21	1.81	19	>sp|P01857|IGHG1_HUMAN Immunoglobulin heavy constant gamma 1 OS=Homo sapiens GN=IGHG1 PE=1 SV=1	11942	File384_Scan13292	controllerType=0 controllerNumber=1 scan=13292	38.7143
09675:3	10	K.THTC[+57.021]PPC[+57.021]PAPELLGGPSVFLFPPKPK.D		C[+57]*2	948.824	3	2844.46	2844.46	0	-0.4	106	Specific	198.09	198.09	198.09	3.36	19	>sp|P01857|IGHG1_HUMAN Immunoglobulin heavy constant gamma 1 OS=Homo sapiens GN=IGHG1 PE=1 SV=1	11942	File384_Scan12028	controllerType=0 controllerNumber=1 scan=12028	36.1196
09997:4	10	K.THTC[+57.021]PPC[+57.021]PAPELLGGPSVFLFPPKPK.D		C[+57]*2	711.87	4	2844.46	2844.46	0	0.9	106	Specific	266.66	266.66	266.66	6.64	19	>sp|P01857|IGHG1_HUMAN Immunoglobulin heavy constant gamma 1 OS=Homo sapiens GN=IGHG1 PE=1 SV=1	11942	File384_Scan12371	controllerType=0 controllerNumber=1 scan=12371	36.8517
09475:3	10	K.THTC[+57.021]PPC[+57.021]PAPELLGGPSVFLFPPKPK.D		C[+57]*2	948.825	3	2844.46	2844.46	0	0.6	106	Specific	273.39	273.39	273.39	6.77	19	>sp|P01857|IGHG1_HUMAN Immunoglobulin heavy constant gamma 1 OS=Homo sapiens GN=IGHG1 PE=1 SV=1	11942	File384_Scan11817	controllerType=0 controllerNumber=1 scan=11817	35.6767
10108:4	10	K.THTC[+57.021]PPC[+57.021]PAPELLGGPSVFLFPPKPK.D		C[+57]*2	711.87	4	2844.46	2844.46	0	0.2	106	Specific	355.34	355.34	355.34	7.97	19	>sp|P01857|IGHG1_HUMAN Immunoglobulin heavy constant gamma 1 OS=Homo sapiens GN=IGHG1 PE=1 SV=1	11942	File384_Scan12488	controllerType=0 controllerNumber=1 scan=12488	37.0896
09882:4	10	K.THTC[+57.021]PPC[+57.021]PAPELLGGPSVFLFPPKPK.D		C[+57]*2	711.871	4	2844.46	2844.46	0	1.2	106	Specific	374.39	374.39	374.39	8.54	19	>sp|P01857|IGHG1_HUMAN Immunoglobulin heavy constant gamma 1 OS=Homo sapiens GN=IGHG1 PE=1 SV=1	11942	File384_Scan12251	controllerType=0 controllerNumber=1 scan=12251	36.5932
09572:3	10	K.THTC[+57.021]PPC[+57.021]PAPELLGGPSVFLFPPKPK.D		C[+57]*2	948.822	3	2844.45	2844.46	0	-1.7	106	Specific	491.97	461.33	461.33	8.9	19	>sp|P01857|IGHG1_HUMAN Immunoglobulin heavy constant gamma 1 OS=Homo sapiens GN=IGHG1 PE=1 SV=1	11942	File384_Scan11919	controllerType=0 controllerNumber=1 scan=11919	35.8969
09773:4	10	K.THTC[+57.021]PPC[+57.021]PAPELLGGPSVFLFPPKPK.D		C[+57]*2	711.87	4	2844.46	2844.46	0	0.4	106	Specific	606.17	606.17	606.17	12.58	19	>sp|P01857|IGHG1_HUMAN Immunoglobulin heavy constant gamma 1 OS=Homo sapiens GN=IGHG1 PE=1 SV=1	11942	File384_Scan12133	controllerType=0 controllerNumber=1 scan=12133	36.3394
09667:4	10	K.THTC[+57.021]PPC[+57.021]PAPELLGGPSVFLFPPKPK.D		C[+57]*2	711.871	4	2844.46	2844.46	0	1.9	106	Specific	954.93	954.93	954.93	19.73	19	>sp|P01857|IGHG1_HUMAN Immunoglobulin heavy constant gamma 1 OS=Homo sapiens GN=IGHG1 PE=1 SV=1	11942	File384_Scan12020	controllerType=0 controllerNumber=1 scan=12020	36.1056
09470:4	10	K.THTC[+57.021]PPC[+57.021]PAPELLGGPSVFLFPPKPK.D		C[+57]*2	711.871	4	2844.46	2844.46	0	2.1	106	Specific	1032.17	1032.17	1032.17	20.22	19	>sp|P01857|IGHG1_HUMAN Immunoglobulin heavy constant gamma 1 OS=Homo sapiens GN=IGHG1 PE=1 SV=1	11942	File384_Scan11812	controllerType=0 controllerNumber=1 scan=11812	35.6676
09569:4	10	K.THTC[+57.021]PPC[+57.021]PAPELLGGPSVFLFPPKPK.D		C[+57]*2	711.87	4	2844.46	2844.46	0	0.2	106	Specific	1044.43	1044.43	1044.43	20.58	19	>sp|P01857|IGHG1_HUMAN Immunoglobulin heavy constant gamma 1 OS=Homo sapiens GN=IGHG1 PE=1 SV=1	11942	File384_Scan11916	controllerType=0 controllerNumber=1 scan=11916	35.8923
02402:2	10	K.DTLM[+15.995]ISR.T		M[+16]	426.218	2	851.429	851.429	0	-0.1	132	Specific	195.69	48.95	48.95	1.38	19	>sp|P01857|IGHG1_HUMAN Immunoglobulin heavy constant gamma 1 OS=Homo sapiens GN=IGHG1 PE=1 SV=1	11942	File384_Scan4169	controllerType=0 controllerNumber=1 scan=4169	18.7188
03821:2	10	K.DTLM[+15.995]ISR.T		M[+16]	426.217	2	851.428	851.429	0	-1.9	132	Specific	238.7	92.84	92.84	2.25	19	>sp|P01857|IGHG1_HUMAN Immunoglobulin heavy constant gamma 1 OS=Homo sapiens GN=IGHG1 PE=1 SV=1	11942	File384_Scan5696	controllerType=0 controllerNumber=1 scan=5696	22.1051
03960:2	10	K.DTLM[+15.995]ISR.T		M[+16]	426.218	2	851.429	851.429	0	-0.2	132	Specific	241.58	83.64	83.64	2.31	19	>sp|P01857|IGHG1_HUMAN Immunoglobulin heavy constant gamma 1 OS=Homo sapiens GN=IGHG1 PE=1 SV=1	11942	File384_Scan5873	controllerType=0 controllerNumber=1 scan=5873	22.5212
03588:2	10	K.DTLM[+15.995]ISR.T		M[+16]	426.218	2	851.429	851.429	0	-0.3	132	Specific	258.9	91.78	91.78	2.51	19	>sp|P01857|IGHG1_HUMAN Immunoglobulin heavy constant gamma 1 OS=Homo sapiens GN=IGHG1 PE=1 SV=1	11942	File384_Scan5415	controllerType=0 controllerNumber=1 scan=5415	21.4839
03480:2	10	K.DTLM[+15.995]ISR.T		M[+16]	426.218	2	851.429	851.429	0	-0.3	132	Specific	265.46	70.13	70.13	2.47	19	>sp|P01857|IGHG1_HUMAN Immunoglobulin heavy constant gamma 1 OS=Homo sapiens GN=IGHG1 PE=1 SV=1	11942	File384_Scan5296	controllerType=0 controllerNumber=1 scan=5296	21.2348
02495:2	10	K.DTLM[+15.995]ISR.T		M[+16]	426.218	2	851.428	851.429	0	-1.1	132	Specific	279.43	123.59	123.59	3.9	19	>sp|P01857|IGHG1_HUMAN Immunoglobulin heavy constant gamma 1 OS=Homo sapiens GN=IGHG1 PE=1 SV=1	11942	File384_Scan4267	controllerType=0 controllerNumber=1 scan=4267	18.9348
03728:2	10	K.DTLM[+15.995]ISR.T		M[+16]	426.219	2	851.431	851.429	0	2.2	132	Specific	287.72	91.07	91.07	2.92	19	>sp|P01857|IGHG1_HUMAN Immunoglobulin heavy constant gamma 1 OS=Homo sapiens GN=IGHG1 PE=1 SV=1	11942	File384_Scan5574	controllerType=0 controllerNumber=1 scan=5574	21.8277
03146:2	10	K.DTLM[+15.995]ISR.T		M[+16]	426.218	2	851.429	851.429	0	0.1	132	Specific	308.87	84.66	84.66	2.92	19	>sp|P01857|IGHG1_HUMAN Immunoglobulin heavy constant gamma 1 OS=Homo sapiens GN=IGHG1 PE=1 SV=1	11942	File384_Scan4947	controllerType=0 controllerNumber=1 scan=4947	20.4851
03358:2	10	K.DTLM[+15.995]ISR.T		M[+16]	426.218	2	851.429	851.429	0	0	132	Specific	309.93	90.13	90.13	2.89	19	>sp|P01857|IGHG1_HUMAN Immunoglobulin heavy constant gamma 1 OS=Homo sapiens GN=IGHG1 PE=1 SV=1	11942	File384_Scan5169	controllerType=0 controllerNumber=1 scan=5169	20.9433
03248:2	10	K.DTLM[+15.995]ISR.T		M[+16]	426.219	2	851.43	851.429	0	0.8	132	Specific	313.45	106.4	106.4	4.16	19	>sp|P01857|IGHG1_HUMAN Immunoglobulin heavy constant gamma 1 OS=Homo sapiens GN=IGHG1 PE=1 SV=1	11942	File384_Scan5054	controllerType=0 controllerNumber=1 scan=5054	20.7028
02799:2	10	K.DTLM[+15.995]ISR.T		M[+16]	426.218	2	851.429	851.429	0	0.2	132	Specific	342.19	114.78	114.78	4.78	19	>sp|P01857|IGHG1_HUMAN Immunoglobulin heavy constant gamma 1 OS=Homo sapiens GN=IGHG1 PE=1 SV=1	11942	File384_Scan4585	controllerType=0 controllerNumber=1 scan=4585	19.6499
02919:2	10	K.DTLM[+15.995]ISR.T		M[+16]	426.218	2	851.429	851.429	0	0.1	132	Specific	342.62	130.56	130.56	4.89	19	>sp|P01857|IGHG1_HUMAN Immunoglobulin heavy constant gamma 1 OS=Homo sapiens GN=IGHG1 PE=1 SV=1	11942	File384_Scan4710	controllerType=0 controllerNumber=1 scan=4710	19.9482
02703:2	10	K.DTLM[+15.995]ISR.T		M[+16]	426.217	2	851.428	851.429	0	-1.6	132	Specific	346.61	113.96	113.96	4.37	19	>sp|P01857|IGHG1_HUMAN Immunoglobulin heavy constant gamma 1 OS=Homo sapiens GN=IGHG1 PE=1 SV=1	11942	File384_Scan4485	controllerType=0 controllerNumber=1 scan=4485	19.4115
02602:2	10	K.DTLM[+15.995]ISR.T		M[+16]	426.218	2	851.429	851.429	0	0.1	132	Specific	370.22	127.96	127.96	6.36	19	>sp|P01857|IGHG1_HUMAN Immunoglobulin heavy constant gamma 1 OS=Homo sapiens GN=IGHG1 PE=1 SV=1	11942	File384_Scan4379	controllerType=0 controllerNumber=1 scan=4379	19.1701
03031:2	10	K.DTLM[+15.995]ISR.T		M[+16]	426.218	2	851.429	851.429	0	0.1	132	Specific	378.82	125.24	125.24	4.83	19	>sp|P01857|IGHG1_HUMAN Immunoglobulin heavy constant gamma 1 OS=Homo sapiens GN=IGHG1 PE=1 SV=1	11942	File384_Scan4827	controllerType=0 controllerNumber=1 scan=4827	20.212
06398:3	10	R.TPEVTC[+57.021]VVVDVSHEDPEVK.F		C[+57]	713.68	3	2139.03	2139.03	0	-0.9	139	Specific	339.69	333.74	333.74	7.71	19	>sp|P01857|IGHG1_HUMAN Immunoglobulin heavy constant gamma 1 OS=Homo sapiens GN=IGHG1 PE=1 SV=1	11942	File384_Scan8578	controllerType=0 controllerNumber=1 scan=8578	29.0109
06634:3	10	R.TPEVTC[+57.021]VVVDVSHEDPEVK.F		C[+57]	713.682	3	2139.03	2139.03	0	1.2	139	Specific	350.22	310.34	310.34	7.94	19	>sp|P01857|IGHG1_HUMAN Immunoglobulin heavy constant gamma 1 OS=Homo sapiens GN=IGHG1 PE=1 SV=1	11942	File384_Scan8825	controllerType=0 controllerNumber=1 scan=8825	29.5255
06507:3	10	R.TPEVTC[+57.021]VVVDVSHEDPEVK.F		C[+57]	713.681	3	2139.03	2139.03	0	0.6	139	Specific	574.72	520.96	520.96	11.29	19	>sp|P01857|IGHG1_HUMAN Immunoglobulin heavy constant gamma 1 OS=Homo sapiens GN=IGHG1 PE=1 SV=1	11942	File384_Scan8692	controllerType=0 controllerNumber=1 scan=8692	29.253
06283:3	10	R.TPEVTC[+57.021]VVVDVSHEDPEVK.F		C[+57]	713.681	3	2139.03	2139.03	0	0.6	139	Specific	715.19	698.18	698.18	15.4	19	>sp|P01857|IGHG1_HUMAN Immunoglobulin heavy constant gamma 1 OS=Homo sapiens GN=IGHG1 PE=1 SV=1	11942	File384_Scan8458	controllerType=0 controllerNumber=1 scan=8458	28.7657
05953:2	10	R.TPEVTC[+57.021]VVVDVSHEDPEVK.F		C[+57]	1070.02	2	2139.03	2139.03	0	1.2	139	Specific	812.55	730.38	730.38	16.99	19	>sp|P01857|IGHG1_HUMAN Immunoglobulin heavy constant gamma 1 OS=Homo sapiens GN=IGHG1 PE=1 SV=1	11942	File384_Scan8113	controllerType=0 controllerNumber=1 scan=8113	28.0013
06175:3	10	R.TPEVTC[+57.021]VVVDVSHEDPEVK.F		C[+57]	713.681	3	2139.03	2139.03	0	0.8	139	Specific	889.73	836.36	836.36	18.4	19	>sp|P01857|IGHG1_HUMAN Immunoglobulin heavy constant gamma 1 OS=Homo sapiens GN=IGHG1 PE=1 SV=1	11942	File384_Scan8345	controllerType=0 controllerNumber=1 scan=8345	28.515
05949:3	10	R.TPEVTC[+57.021]VVVDVSHEDPEVK.F		C[+57]	713.682	3	2139.03	2139.03	0	1.5	139	Specific	919.08	858.79	858.79	19.55	19	>sp|P01857|IGHG1_HUMAN Immunoglobulin heavy constant gamma 1 OS=Homo sapiens GN=IGHG1 PE=1 SV=1	11942	File384_Scan8109	controllerType=0 controllerNumber=1 scan=8109	27.9911
06064:3	10	R.TPEVTC[+57.021]VVVDVSHEDPEVK.F		C[+57]	713.681	3	2139.03	2139.03	0	0.9	139	Specific	981.41	899.17	899.17	20.4	19	>sp|P01857|IGHG1_HUMAN Immunoglobulin heavy constant gamma 1 OS=Homo sapiens GN=IGHG1 PE=1 SV=1	11942	File384_Scan8229	controllerType=0 controllerNumber=1 scan=8229	28.2653
13584:2	10	K.FNWYVDGVEVHNAK.T			839.406	2	1677.8	1677.8	0	1.7	158	Specific	26.2	26.2	26.2	0.7	19	>sp|P01857|IGHG1_HUMAN Immunoglobulin heavy constant gamma 1 OS=Homo sapiens GN=IGHG1 PE=1 SV=1	11942	File384_Scan16743	controllerType=0 controllerNumber=1 scan=16743	48.3751
10991:3	10	K.FNWYVDGVEVHNAK.T			559.94	3	1677.8	1677.8	0	1.4	158	Specific	28.21	28.21	28.21	1.63	19	>sp|P01857|IGHG1_HUMAN Immunoglobulin heavy constant gamma 1 OS=Homo sapiens GN=IGHG1 PE=1 SV=1	11942	File384_Scan13422	controllerType=0 controllerNumber=1 scan=13422	38.9658
13364:2	10	K.FNWYVDGVEVHNAK.T			839.407	2	1677.81	1677.8	0	2.7	158	Specific	35.58	35.58	35.58	0.49	19	>sp|P01857|IGHG1_HUMAN Immunoglobulin heavy constant gamma 1 OS=Homo sapiens GN=IGHG1 PE=1 SV=1	11942	File384_Scan16506	controllerType=0 controllerNumber=1 scan=16506	47.8772
13989:3	10	K.FNWYVDGVEVHNAK.T			559.939	3	1677.8	1677.8	0	0.4	158	Specific	52.11	52.11	52.11	1.45	19	>sp|P01857|IGHG1_HUMAN Immunoglobulin heavy constant gamma 1 OS=Homo sapiens GN=IGHG1 PE=1 SV=1	11942	File384_Scan17249	controllerType=0 controllerNumber=1 scan=17249	49.7351
13942:3	10	K.FNWYVDGVEVHNAK.T			559.939	3	1677.8	1677.8	0	0.5	158	Specific	53.7	53.7	53.7	0.93	19	>sp|P01857|IGHG1_HUMAN Immunoglobulin heavy constant gamma 1 OS=Homo sapiens GN=IGHG1 PE=1 SV=1	11942	File384_Scan17163	controllerType=0 controllerNumber=1 scan=17163	49.3742
13968:3	10	K.FNWYVDGVEVHNAK.T			559.939	3	1677.8	1677.8	0	0.3	158	Specific	66.06	66.06	66.06	1.58	19	>sp|P01857|IGHG1_HUMAN Immunoglobulin heavy constant gamma 1 OS=Homo sapiens GN=IGHG1 PE=1 SV=1	11942	File384_Scan17209	controllerType=0 controllerNumber=1 scan=17209	49.5608
13690:2	10	K.FNWYVDGVEVHNAK.T			839.406	2	1677.8	1677.8	0	1.6	158	Specific	79.51	79.51	79.51	1.78	19	>sp|P01857|IGHG1_HUMAN Immunoglobulin heavy constant gamma 1 OS=Homo sapiens GN=IGHG1 PE=1 SV=1	11942	File384_Scan16859	controllerType=0 controllerNumber=1 scan=16859	48.6137
13482:2	10	K.FNWYVDGVEVHNAK.T			839.406	2	1677.8	1677.8	0	1.4	158	Specific	107.06	107.06	107.06	1.61	19	>sp|P01857|IGHG1_HUMAN Immunoglobulin heavy constant gamma 1 OS=Homo sapiens GN=IGHG1 PE=1 SV=1	11942	File384_Scan16631	controllerType=0 controllerNumber=1 scan=16631	48.1369
13901:3	10	K.FNWYVDGVEVHNAK.T			559.939	3	1677.8	1677.8	0	-0.1	158	Specific	144.71	144.71	144.71	1.87	19	>sp|P01857|IGHG1_HUMAN Immunoglobulin heavy constant gamma 1 OS=Homo sapiens GN=IGHG1 PE=1 SV=1	11942	File384_Scan17106	controllerType=0 controllerNumber=1 scan=17106	49.197
10139:3	10	K.FNWYVDGVEVHNAK.T			559.939	3	1677.8	1677.8	0	0.5	158	Specific	221.13	221.13	221.13	4.79	19	>sp|P01857|IGHG1_HUMAN Immunoglobulin heavy constant gamma 1 OS=Homo sapiens GN=IGHG1 PE=1 SV=1	11942	File384_Scan12520	controllerType=0 controllerNumber=1 scan=12520	37.1558
09957:3	10	K.FNWYVDGVEVHNAK.T			559.939	3	1677.8	1677.8	0	-0.3	158	Specific	221.42	168.79	168.79	3.89	19	>sp|P01857|IGHG1_HUMAN Immunoglobulin heavy constant gamma 1 OS=Homo sapiens GN=IGHG1 PE=1 SV=1	11942	File384_Scan12329	controllerType=0 controllerNumber=1 scan=12329	36.7616
13775:3	10	K.FNWYVDGVEVHNAK.T			559.939	3	1677.8	1677.8	0	0.1	158	Specific	265.89	265.89	265.89	5.9	19	>sp|P01857|IGHG1_HUMAN Immunoglobulin heavy constant gamma 1 OS=Homo sapiens GN=IGHG1 PE=1 SV=1	11942	File384_Scan16960	controllerType=0 controllerNumber=1 scan=16960	48.8373
13349:3	10	K.FNWYVDGVEVHNAK.T			559.939	3	1677.8	1677.8	0	1.2	158	Specific	273.33	273.33	273.33	6.04	19	>sp|P01857|IGHG1_HUMAN Immunoglobulin heavy constant gamma 1 OS=Homo sapiens GN=IGHG1 PE=1 SV=1	11942	File384_Scan16490	controllerType=0 controllerNumber=1 scan=16490	47.8419
13664:3	10	K.FNWYVDGVEVHNAK.T			559.939	3	1677.8	1677.8	0	0.1	158	Specific	275.11	275.11	275.11	5.61	19	>sp|P01857|IGHG1_HUMAN Immunoglobulin heavy constant gamma 1 OS=Homo sapiens GN=IGHG1 PE=1 SV=1	11942	File384_Scan16832	controllerType=0 controllerNumber=1 scan=16832	48.5568
13843:3	10	K.FNWYVDGVEVHNAK.T			559.939	3	1677.8	1677.8	0	0.2	158	Specific	295.36	295.36	295.36	6.01	19	>sp|P01857|IGHG1_HUMAN Immunoglobulin heavy constant gamma 1 OS=Homo sapiens GN=IGHG1 PE=1 SV=1	11942	File384_Scan17036	controllerType=0 controllerNumber=1 scan=17036	49.0084
08196:3	10	K.FNWYVDGVEVHNAK.T			559.94	3	1677.8	1677.8	0	1.4	158	Specific	314.29	314.29	314.29	5.98	19	>sp|P01857|IGHG1_HUMAN Immunoglobulin heavy constant gamma 1 OS=Homo sapiens GN=IGHG1 PE=1 SV=1	11942	File384_Scan10465	controllerType=0 controllerNumber=1 scan=10465	32.8967
13561:3	10	K.FNWYVDGVEVHNAK.T			559.939	3	1677.8	1677.8	0	0.2	158	Specific	359.37	359.37	359.37	6.99	19	>sp|P01857|IGHG1_HUMAN Immunoglobulin heavy constant gamma 1 OS=Homo sapiens GN=IGHG1 PE=1 SV=1	11942	File384_Scan16717	controllerType=0 controllerNumber=1 scan=16717	48.3177
13454:3	10	K.FNWYVDGVEVHNAK.T			559.939	3	1677.8	1677.8	0	0	158	Specific	387.69	387.69	387.69	8.33	19	>sp|P01857|IGHG1_HUMAN Immunoglobulin heavy constant gamma 1 OS=Homo sapiens GN=IGHG1 PE=1 SV=1	11942	File384_Scan16602	controllerType=0 controllerNumber=1 scan=16602	48.0697
06503:2	10	K.FNWYVDGVEVHNAK.T			839.406	2	1677.8	1677.8	0	1.3	158	Specific	397.73	338.65	338.65	6.5	19	>sp|P01857|IGHG1_HUMAN Immunoglobulin heavy constant gamma 1 OS=Homo sapiens GN=IGHG1 PE=1 SV=1	11942	File384_Scan8688	controllerType=0 controllerNumber=1 scan=8688	29.2469
06612:2	10	K.FNWYVDGVEVHNAK.T			839.405	2	1677.8	1677.8	0	0.3	158	Specific	425.58	374.55	374.55	6.42	19	>sp|P01857|IGHG1_HUMAN Immunoglobulin heavy constant gamma 1 OS=Homo sapiens GN=IGHG1 PE=1 SV=1	11942	File384_Scan8802	controllerType=0 controllerNumber=1 scan=8802	29.4804
06392:2	10	K.FNWYVDGVEVHNAK.T			839.405	2	1677.8	1677.8	0	0.3	158	Specific	480.94	428.63	428.63	8.3	19	>sp|P01857|IGHG1_HUMAN Immunoglobulin heavy constant gamma 1 OS=Homo sapiens GN=IGHG1 PE=1 SV=1	11942	File384_Scan8572	controllerType=0 controllerNumber=1 scan=8572	29.0002
07257:3	10	K.FNWYVDGVEVHNAK.T			559.939	3	1677.8	1677.8	0	1.2	158	Specific	497.23	497.23	497.23	8.73	19	>sp|P01857|IGHG1_HUMAN Immunoglobulin heavy constant gamma 1 OS=Homo sapiens GN=IGHG1 PE=1 SV=1	11942	File384_Scan9478	controllerType=0 controllerNumber=1 scan=9478	30.8756
06002:3	10	K.FNWYVDGVEVHNAK.T			559.939	3	1677.8	1677.8	0	0.2	158	Specific	510.44	421.04	421.04	9.02	19	>sp|P01857|IGHG1_HUMAN Immunoglobulin heavy constant gamma 1 OS=Homo sapiens GN=IGHG1 PE=1 SV=1	11942	File384_Scan8164	controllerType=0 controllerNumber=1 scan=8164	28.1124
07065:3	10	K.FNWYVDGVEVHNAK.T			559.939	3	1677.8	1677.8	0	0.8	158	Specific	518.67	397.47	397.47	9.11	19	>sp|P01857|IGHG1_HUMAN Immunoglobulin heavy constant gamma 1 OS=Homo sapiens GN=IGHG1 PE=1 SV=1	11942	File384_Scan9277	controllerType=0 controllerNumber=1 scan=9277	30.4566
06805:3	10	K.FNWYVDGVEVHNAK.T			559.939	3	1677.8	1677.8	0	0.2	158	Specific	519.92	378.15	378.15	7.85	19	>sp|P01857|IGHG1_HUMAN Immunoglobulin heavy constant gamma 1 OS=Homo sapiens GN=IGHG1 PE=1 SV=1	11942	File384_Scan9005	controllerType=0 controllerNumber=1 scan=9005	29.8894
07398:3	10	K.FNWYVDGVEVHNAK.T			559.939	3	1677.8	1677.8	0	0.8	158	Specific	533.9	514.22	514.22	9.3	19	>sp|P01857|IGHG1_HUMAN Immunoglobulin heavy constant gamma 1 OS=Homo sapiens GN=IGHG1 PE=1 SV=1	11942	File384_Scan9626	controllerType=0 controllerNumber=1 scan=9626	31.1743
06284:2	10	K.FNWYVDGVEVHNAK.T			839.406	2	1677.8	1677.8	0	1.2	158	Specific	536.46	402.18	402.18	9.57	19	>sp|P01857|IGHG1_HUMAN Immunoglobulin heavy constant gamma 1 OS=Homo sapiens GN=IGHG1 PE=1 SV=1	11942	File384_Scan8459	controllerType=0 controllerNumber=1 scan=8459	28.7673
06953:3	10	K.FNWYVDGVEVHNAK.T			559.939	3	1677.8	1677.8	0	0.4	158	Specific	548.21	422.5	422.5	9.46	19	>sp|P01857|IGHG1_HUMAN Immunoglobulin heavy constant gamma 1 OS=Homo sapiens GN=IGHG1 PE=1 SV=1	11942	File384_Scan9160	controllerType=0 controllerNumber=1 scan=9160	30.2032
06773:3	10	K.FNWYVDGVEVHNAK.T			559.939	3	1677.8	1677.8	0	0.7	158	Specific	577.63	401.25	401.25	9.41	19	>sp|P01857|IGHG1_HUMAN Immunoglobulin heavy constant gamma 1 OS=Homo sapiens GN=IGHG1 PE=1 SV=1	11942	File384_Scan8971	controllerType=0 controllerNumber=1 scan=8971	29.8218
06171:2	10	K.FNWYVDGVEVHNAK.T			839.405	2	1677.8	1677.8	0	0.9	158	Specific	591.15	373.87	373.87	9.61	19	>sp|P01857|IGHG1_HUMAN Immunoglobulin heavy constant gamma 1 OS=Homo sapiens GN=IGHG1 PE=1 SV=1	11942	File384_Scan8341	controllerType=0 controllerNumber=1 scan=8341	28.5075
06073:2	10	K.FNWYVDGVEVHNAK.T			839.405	2	1677.8	1677.8	0	0.5	158	Specific	593.28	330.24	330.24	8.48	19	>sp|P01857|IGHG1_HUMAN Immunoglobulin heavy constant gamma 1 OS=Homo sapiens GN=IGHG1 PE=1 SV=1	11942	File384_Scan8238	controllerType=0 controllerNumber=1 scan=8238	28.2852
06540:3	10	K.FNWYVDGVEVHNAK.T			559.939	3	1677.8	1677.8	0	0.7	158	Specific	694.76	497.69	497.69	13.42	19	>sp|P01857|IGHG1_HUMAN Immunoglobulin heavy constant gamma 1 OS=Homo sapiens GN=IGHG1 PE=1 SV=1	11942	File384_Scan8727	controllerType=0 controllerNumber=1 scan=8727	29.3325
06431:3	10	K.FNWYVDGVEVHNAK.T			559.939	3	1677.8	1677.8	0	0.1	158	Specific	705	505.64	505.64	14.42	19	>sp|P01857|IGHG1_HUMAN Immunoglobulin heavy constant gamma 1 OS=Homo sapiens GN=IGHG1 PE=1 SV=1	11942	File384_Scan8613	controllerType=0 controllerNumber=1 scan=8613	29.0842
06326:3	10	K.FNWYVDGVEVHNAK.T			559.939	3	1677.8	1677.8	0	0.5	158	Specific	713.6	524.46	524.46	14.42	19	>sp|P01857|IGHG1_HUMAN Immunoglobulin heavy constant gamma 1 OS=Homo sapiens GN=IGHG1 PE=1 SV=1	11942	File384_Scan8503	controllerType=0 controllerNumber=1 scan=8503	28.8594
06215:3	10	K.FNWYVDGVEVHNAK.T			559.939	3	1677.8	1677.8	0	1.1	158	Specific	732.27	510.12	510.12	14.56	19	>sp|P01857|IGHG1_HUMAN Immunoglobulin heavy constant gamma 1 OS=Homo sapiens GN=IGHG1 PE=1 SV=1	11942	File384_Scan8387	controllerType=0 controllerNumber=1 scan=8387	28.6049
06660:3	10	K.FNWYVDGVEVHNAK.T			559.938	3	1677.8	1677.8	0	-1.5	158	Specific	732.82	556.01	556.01	13.97	19	>sp|P01857|IGHG1_HUMAN Immunoglobulin heavy constant gamma 1 OS=Homo sapiens GN=IGHG1 PE=1 SV=1	11942	File384_Scan8853	controllerType=0 controllerNumber=1 scan=8853	29.5849
06106:3	10	K.FNWYVDGVEVHNAK.T			559.939	3	1677.8	1677.8	0	0.8	158	Specific	735.64	515.32	515.32	14.42	19	>sp|P01857|IGHG1_HUMAN Immunoglobulin heavy constant gamma 1 OS=Homo sapiens GN=IGHG1 PE=1 SV=1	11942	File384_Scan8273	controllerType=0 controllerNumber=1 scan=8273	28.3573
00546:3	10	R.EEQYN[+1768.640]STYR.V	HexNAc(4)Hex(5)Fuc(1)	N[+1769]	986.725	3	2958.16	2958.15	0	2.9	176	Specific	163.63	25.65	25.65	1.83	19	>sp|P01857|IGHG1_HUMAN Immunoglobulin heavy constant gamma 1 OS=Homo sapiens GN=IGHG1 PE=1 SV=1	11942	File384_Scan2226	controllerType=0 controllerNumber=1 scan=2226	14.503
00549:3	10	R.EEQYN[+1606.587]STYR.V	HexNAc(4)Hex(4)Fuc(1)	N[+1607]	932.706	3	2796.1	2796.1	0	1.2	176	Specific	207.65	142.89	142.89	5.37	19	>sp|P01857|IGHG1_HUMAN Immunoglobulin heavy constant gamma 1 OS=Homo sapiens GN=IGHG1 PE=1 SV=1	11942	File384_Scan2229	controllerType=0 controllerNumber=1 scan=2229	14.5124
00723:3	10	R.EEQYN[+2059.735]STYR.V	HexNAc(4)Hex(5)Fuc(1)NeuAc(1)	N[+2060]	1083.76	3	3249.25	3249.25	0	1.3	176	Specific	208.18	119.54	119.54	4.91	19	>sp|P01857|IGHG1_HUMAN Immunoglobulin heavy constant gamma 1 OS=Homo sapiens GN=IGHG1 PE=1 SV=1	11942	File384_Scan2410	controllerType=0 controllerNumber=1 scan=2410	14.93
00574:2	10	R.EEQYN[+1444.534]STYR.V	HexNAc(4)Hex(3)Fuc(1)	N[+1445]	1317.53	2	2634.05	2634.05	0	0.8	176	Specific	272.79	151.51	151.51	6.55	19	>sp|P01857|IGHG1_HUMAN Immunoglobulin heavy constant gamma 1 OS=Homo sapiens GN=IGHG1 PE=1 SV=1	11942	File384_Scan2255	controllerType=0 controllerNumber=1 scan=2255	14.5727
00555:2	10	R.EEQYN[+1606.587]STYR.V	HexNAc(4)Hex(4)Fuc(1)	N[+1607]	1398.55	2	2796.1	2796.1	0	1.2	176	Specific	328.19	132.89	132.89	6.63	19	>sp|P01857|IGHG1_HUMAN Immunoglobulin heavy constant gamma 1 OS=Homo sapiens GN=IGHG1 PE=1 SV=1	11942	File384_Scan2235	controllerType=0 controllerNumber=1 scan=2235	14.5282
00553:2	10	R.EEQYN[+1606.587]STYR.V	HexNAc(4)Hex(4)Fuc(1)	N[+1607]	1398.55	2	2796.1	2796.1	0	1.2	176	Specific	330.37	192.23	192.23	7.21	19	>sp|P01857|IGHG1_HUMAN Immunoglobulin heavy constant gamma 1 OS=Homo sapiens GN=IGHG1 PE=1 SV=1	11942	File384_Scan2233	controllerType=0 controllerNumber=1 scan=2233	14.5239
00579:3	10	R.EEQYN[+1444.534]STYR.V	HexNAc(4)Hex(3)Fuc(1)	N[+1445]	878.687	3	2634.05	2634.05	0	0.6	176	Specific	337.54	164.15	164.15	6.53	19	>sp|P01857|IGHG1_HUMAN Immunoglobulin heavy constant gamma 1 OS=Homo sapiens GN=IGHG1 PE=1 SV=1	11942	File384_Scan2260	controllerType=0 controllerNumber=1 scan=2260	14.5878
00551:3	10	R.EEQYN[+1606.587]STYR.V	HexNAc(4)Hex(4)Fuc(1)	N[+1607]	932.706	3	2796.1	2796.1	0	1.2	176	Specific	373.21	227.51	227.51	7.94	19	>sp|P01857|IGHG1_HUMAN Immunoglobulin heavy constant gamma 1 OS=Homo sapiens GN=IGHG1 PE=1 SV=1	11942	File384_Scan2231	controllerType=0 controllerNumber=1 scan=2231	14.5184
00725:3	10	R.EEQYN[+2059.735]STYR.V	HexNAc(4)Hex(5)Fuc(1)NeuAc(1)	N[+2060]	1083.76	3	3249.25	3249.25	0	1.3	176	Specific	398.29	219.06	219.06	7.86	19	>sp|P01857|IGHG1_HUMAN Immunoglobulin heavy constant gamma 1 OS=Homo sapiens GN=IGHG1 PE=1 SV=1	11942	File384_Scan2412	controllerType=0 controllerNumber=1 scan=2412	14.9342
00576:2	10	R.EEQYN[+1444.534]STYR.V	HexNAc(4)Hex(3)Fuc(1)	N[+1445]	1317.53	2	2634.05	2634.05	0	0.8	176	Specific	412.69	182.86	182.86	7.6	19	>sp|P01857|IGHG1_HUMAN Immunoglobulin heavy constant gamma 1 OS=Homo sapiens GN=IGHG1 PE=1 SV=1	11942	File384_Scan2257	controllerType=0 controllerNumber=1 scan=2257	14.5806
10676:2	10	R.VVSVLTVLHQDWLNGK.E			904.509	2	1808.01	1808.01	0	2.2	185	Specific	319.99	265.33	265.33	6.69	19	>sp|P01857|IGHG1_HUMAN Immunoglobulin heavy constant gamma 1 OS=Homo sapiens GN=IGHG1 PE=1 SV=1	11942	File384_Scan13090	controllerType=0 controllerNumber=1 scan=13090	38.3105
10547:2	10	R.VVSVLTVLHQDWLNGK.E			904.508	2	1808.01	1808.01	0	1.4	185	Specific	663.49	521.17	521.17	13.25	19	>sp|P01857|IGHG1_HUMAN Immunoglobulin heavy constant gamma 1 OS=Homo sapiens GN=IGHG1 PE=1 SV=1	11942	File384_Scan12955	controllerType=0 controllerNumber=1 scan=12955	38.0449
10624:3	10	R.VVSVLTVLHQDWLNGK.E			603.342	3	1808.01	1808.01	0	2.4	185	Specific	741.87	633.33	633.33	14.3	19	>sp|P01857|IGHG1_HUMAN Immunoglobulin heavy constant gamma 1 OS=Homo sapiens GN=IGHG1 PE=1 SV=1	11942	File384_Scan13036	controllerType=0 controllerNumber=1 scan=13036	38.1992
10524:3	10	R.VVSVLTVLHQDWLNGK.E			603.341	3	1808.01	1808.01	0	1.1	185	Specific	781.42	686.1	686.1	15.81	19	>sp|P01857|IGHG1_HUMAN Immunoglobulin heavy constant gamma 1 OS=Homo sapiens GN=IGHG1 PE=1 SV=1	11942	File384_Scan12931	controllerType=0 controllerNumber=1 scan=12931	37.9947
03984:2	10	K.ALPAPIEK.T			419.755	2	838.503	838.503	0	-0.7	210	Specific	363.22	256.13	256.13	6.1	19	>sp|P01857|IGHG1_HUMAN Immunoglobulin heavy constant gamma 1 OS=Homo sapiens GN=IGHG1 PE=1 SV=1	11942	File384_Scan5903	controllerType=0 controllerNumber=1 scan=5903	22.5971
03773:2	10	K.ALPAPIEK.T			419.755	2	838.503	838.503	0	0.1	210	Specific	374.9	237.17	237.17	6.13	19	>sp|P01857|IGHG1_HUMAN Immunoglobulin heavy constant gamma 1 OS=Homo sapiens GN=IGHG1 PE=1 SV=1	11942	File384_Scan5640	controllerType=0 controllerNumber=1 scan=5640	21.9895
03875:2	10	K.ALPAPIEK.T			419.755	2	838.504	838.503	0	0.2	210	Specific	376.69	228.51	228.51	6.4	19	>sp|P01857|IGHG1_HUMAN Immunoglobulin heavy constant gamma 1 OS=Homo sapiens GN=IGHG1 PE=1 SV=1	11942	File384_Scan5767	controllerType=0 controllerNumber=1 scan=5767	22.2727
03378:2	10	K.ALPAPIEK.T			419.755	2	838.503	838.503	0	0	210	Specific	388.2	127.54	127.54	6.18	19	>sp|P01857|IGHG1_HUMAN Immunoglobulin heavy constant gamma 1 OS=Homo sapiens GN=IGHG1 PE=1 SV=1	11942	File384_Scan5190	controllerType=0 controllerNumber=1 scan=5190	20.991
03472:2	10	K.ALPAPIEK.T			419.755	2	838.504	838.503	0	0.5	210	Specific	409.04	141.43	141.43	6.96	19	>sp|P01857|IGHG1_HUMAN Immunoglobulin heavy constant gamma 1 OS=Homo sapiens GN=IGHG1 PE=1 SV=1	11942	File384_Scan5288	controllerType=0 controllerNumber=1 scan=5288	21.2184
03681:2	10	K.ALPAPIEK.T			419.756	2	838.504	838.503	0	0.9	210	Specific	421.92	255.28	255.28	7.39	19	>sp|P01857|IGHG1_HUMAN Immunoglobulin heavy constant gamma 1 OS=Homo sapiens GN=IGHG1 PE=1 SV=1	11942	File384_Scan5517	controllerType=0 controllerNumber=1 scan=5517	21.7015
03574:2	10	K.ALPAPIEK.T			419.755	2	838.503	838.503	0	-0.7	210	Specific	432.66	227.13	227.13	7.09	19	>sp|P01857|IGHG1_HUMAN Immunoglobulin heavy constant gamma 1 OS=Homo sapiens GN=IGHG1 PE=1 SV=1	11942	File384_Scan5401	controllerType=0 controllerNumber=1 scan=5401	21.4609
04686:2	10	R.EPQVYTLPPSR.D			643.841	2	1286.67	1286.67	0	0.8	228	Specific	569.12	383	383	10.31	19	>sp|P01857|IGHG1_HUMAN Immunoglobulin heavy constant gamma 1 OS=Homo sapiens GN=IGHG1 PE=1 SV=1	11942	File384_Scan6778	controllerType=0 controllerNumber=1 scan=6778	24.7532
04166:2	10	R.EPQVYTLPPSR.D			643.841	2	1286.67	1286.67	0	0.5	228	Specific	613.78	504.72	504.72	12.42	19	>sp|P01857|IGHG1_HUMAN Immunoglobulin heavy constant gamma 1 OS=Homo sapiens GN=IGHG1 PE=1 SV=1	11942	File384_Scan6139	controllerType=0 controllerNumber=1 scan=6139	23.187
04578:2	10	R.EPQVYTLPPSR.D			643.84	2	1286.67	1286.67	0	-1.3	228	Specific	635.72	468.96	468.96	11.97	19	>sp|P01857|IGHG1_HUMAN Immunoglobulin heavy constant gamma 1 OS=Homo sapiens GN=IGHG1 PE=1 SV=1	11942	File384_Scan6657	controllerType=0 controllerNumber=1 scan=6657	24.4807
04234:2	10	R.EPQVYTLPPSR.D			643.841	2	1286.68	1286.67	0	1.4	228	Specific	696.01	473.83	473.83	13.57	19	>sp|P01857|IGHG1_HUMAN Immunoglobulin heavy constant gamma 1 OS=Homo sapiens GN=IGHG1 PE=1 SV=1	11942	File384_Scan6241	controllerType=0 controllerNumber=1 scan=6241	23.4406
04307:2	10	R.EPQVYTLPPSR.D			643.842	2	1286.68	1286.67	0	1.6	228	Specific	696.81	473.24	473.24	13.57	19	>sp|P01857|IGHG1_HUMAN Immunoglobulin heavy constant gamma 1 OS=Homo sapiens GN=IGHG1 PE=1 SV=1	11942	File384_Scan6342	controllerType=0 controllerNumber=1 scan=6342	23.6848
04395:2	10	R.EPQVYTLPPSR.D			643.842	2	1286.68	1286.67	0	1.7	228	Specific	701.93	475.31	475.31	14.57	19	>sp|P01857|IGHG1_HUMAN Immunoglobulin heavy constant gamma 1 OS=Homo sapiens GN=IGHG1 PE=1 SV=1	11942	File384_Scan6448	controllerType=0 controllerNumber=1 scan=6448	23.9568
04489:2	10	R.EPQVYTLPPSR.D			643.841	2	1286.68	1286.67	0	1.4	228	Specific	717.26	484.13	484.13	14.57	19	>sp|P01857|IGHG1_HUMAN Immunoglobulin heavy constant gamma 1 OS=Homo sapiens GN=IGHG1 PE=1 SV=1	11942	File384_Scan6558	controllerType=0 controllerNumber=1 scan=6558	24.2391
04845:2	10	R.EPQVYTLPPSRDELTK.N			936.99	2	1872.97	1872.97	0	1.5	228	Specific	206.43	103.8	103.8	1.86	19	>sp|P01857|IGHG1_HUMAN Immunoglobulin heavy constant gamma 1 OS=Homo sapiens GN=IGHG1 PE=1 SV=1	11942	File384_Scan6942	controllerType=0 controllerNumber=1 scan=6942	25.1872
04847:2	10	R.EPQVYTLPPSRDELTK.N			936.99	2	1872.97	1872.97	0	1.5	228	Specific	278.28	112.23	112.23	2.22	19	>sp|P01857|IGHG1_HUMAN Immunoglobulin heavy constant gamma 1 OS=Homo sapiens GN=IGHG1 PE=1 SV=1	11942	File384_Scan6944	controllerType=0 controllerNumber=1 scan=6944	25.1922
05040:3	10	R.EPQVYTLPPSRDELTK.N			624.996	3	1872.97	1872.97	0	1.2	228	Specific	462.87	462.87	462.87	8.76	19	>sp|P01857|IGHG1_HUMAN Immunoglobulin heavy constant gamma 1 OS=Homo sapiens GN=IGHG1 PE=1 SV=1	11942	File384_Scan7145	controllerType=0 controllerNumber=1 scan=7145	25.6807
04728:2	10	R.EPQVYTLPPSRDELTK.N			936.986	2	1872.97	1872.97	0	-2.6	228	Specific	581.85	547.56	547.56	9.61	19	>sp|P01857|IGHG1_HUMAN Immunoglobulin heavy constant gamma 1 OS=Homo sapiens GN=IGHG1 PE=1 SV=1	11942	File384_Scan6821	controllerType=0 controllerNumber=1 scan=6821	24.8678
04881:3	10	R.EPQVYTLPPSRDELTK.N			624.995	3	1872.97	1872.97	0	-0.2	228	Specific	618.39	593.46	593.46	11.78	19	>sp|P01857|IGHG1_HUMAN Immunoglobulin heavy constant gamma 1 OS=Homo sapiens GN=IGHG1 PE=1 SV=1	11942	File384_Scan6980	controllerType=0 controllerNumber=1 scan=6980	25.2925
04411:2	10	R.EPQVYTLPPSRDELTK.N			936.99	2	1872.97	1872.97	0	1.2	228	Specific	655.09	550.33	550.33	12.59	19	>sp|P01857|IGHG1_HUMAN Immunoglobulin heavy constant gamma 1 OS=Homo sapiens GN=IGHG1 PE=1 SV=1	11942	File384_Scan6468	controllerType=0 controllerNumber=1 scan=6468	24.0084
04440:3	10	R.EPQVYTLPPSRDELTK.N			624.996	3	1872.97	1872.97	0	1.2	228	Specific	684.19	647.91	647.91	13.15	19	>sp|P01857|IGHG1_HUMAN Immunoglobulin heavy constant gamma 1 OS=Homo sapiens GN=IGHG1 PE=1 SV=1	11942	File384_Scan6503	controllerType=0 controllerNumber=1 scan=6503	24.0963
04713:3	10	R.EPQVYTLPPSRDELTK.N			624.993	3	1872.96	1872.97	0	-2.9	228	Specific	684.8	652.47	652.47	12.17	19	>sp|P01857|IGHG1_HUMAN Immunoglobulin heavy constant gamma 1 OS=Homo sapiens GN=IGHG1 PE=1 SV=1	11942	File384_Scan6806	controllerType=0 controllerNumber=1 scan=6806	24.8287
04619:3	10	R.EPQVYTLPPSRDELTK.N			624.995	3	1872.97	1872.97	0	1	228	Specific	696.72	670.65	670.65	13	19	>sp|P01857|IGHG1_HUMAN Immunoglobulin heavy constant gamma 1 OS=Homo sapiens GN=IGHG1 PE=1 SV=1	11942	File384_Scan6704	controllerType=0 controllerNumber=1 scan=6704	24.5855
04533:3	10	R.EPQVYTLPPSRDELTK.N			624.996	3	1872.97	1872.97	0	1.5	228	Specific	720.24	681.74	681.74	14.15	19	>sp|P01857|IGHG1_HUMAN Immunoglobulin heavy constant gamma 1 OS=Homo sapiens GN=IGHG1 PE=1 SV=1	11942	File384_Scan6606	controllerType=0 controllerNumber=1 scan=6606	24.3473
04607:2	10	R.EPQVYTLPPSRDELTK.N			936.99	2	1872.97	1872.97	0	1	228	Specific	727.87	628	628	13.44	19	>sp|P01857|IGHG1_HUMAN Immunoglobulin heavy constant gamma 1 OS=Homo sapiens GN=IGHG1 PE=1 SV=1	11942	File384_Scan6691	controllerType=0 controllerNumber=1 scan=6691	24.5623
04519:2	10	R.EPQVYTLPPSRDELTK.N			936.99	2	1872.97	1872.97	0	1.1	228	Specific	729.07	627.09	627.09	13.59	19	>sp|P01857|IGHG1_HUMAN Immunoglobulin heavy constant gamma 1 OS=Homo sapiens GN=IGHG1 PE=1 SV=1	11942	File384_Scan6589	controllerType=0 controllerNumber=1 scan=6589	24.312
04350:3	10	R.EPQVYTLPPSRDELTK.N			624.995	3	1872.97	1872.97	0	0.5	228	Specific	731.49	690.25	690.25	14	19	>sp|P01857|IGHG1_HUMAN Immunoglobulin heavy constant gamma 1 OS=Homo sapiens GN=IGHG1 PE=1 SV=1	11942	File384_Scan6396	controllerType=0 controllerNumber=1 scan=6396	23.8303
04730:2	10	R.EPQVYTLPPSRDELTK.N			936.986	2	1872.97	1872.97	0	-2.6	228	Specific	763.26	590.24	590.24	12.81	19	>sp|P01857|IGHG1_HUMAN Immunoglobulin heavy constant gamma 1 OS=Homo sapiens GN=IGHG1 PE=1 SV=1	11942	File384_Scan6823	controllerType=0 controllerNumber=1 scan=6823	24.872
05979:2	10	K.NQVSLTC[+57.021]LVK.G		C[+57]	581.319	2	1161.63	1161.63	0	0.9	244	Specific	428.55	115.49	115.49	5.93	19	>sp|P01857|IGHG1_HUMAN Immunoglobulin heavy constant gamma 1 OS=Homo sapiens GN=IGHG1 PE=1 SV=1	11942	File384_Scan8140	controllerType=0 controllerNumber=1 scan=8140	28.0589
05770:2	10	K.NQVSLTC[+57.021]LVK.G		C[+57]	581.319	2	1161.63	1161.63	0	1	244	Specific	496.66	195.21	195.21	7.7	19	>sp|P01857|IGHG1_HUMAN Immunoglobulin heavy constant gamma 1 OS=Homo sapiens GN=IGHG1 PE=1 SV=1	11942	File384_Scan7922	controllerType=0 controllerNumber=1 scan=7922	27.5478
05875:2	10	K.NQVSLTC[+57.021]LVK.G		C[+57]	581.317	2	1161.63	1161.63	0	-1.8	244	Specific	530.88	207.21	207.21	7.71	19	>sp|P01857|IGHG1_HUMAN Immunoglobulin heavy constant gamma 1 OS=Homo sapiens GN=IGHG1 PE=1 SV=1	11942	File384_Scan8032	controllerType=0 controllerNumber=1 scan=8032	27.8087
08637:2	10	K.GFYPSDIAVEWESNGQPENNYK.T			1272.57	2	2544.13	2544.13	0	1.4	254	Specific	183.72	183.72	183.72	4.86	19	>sp|P01857|IGHG1_HUMAN Immunoglobulin heavy constant gamma 1 OS=Homo sapiens GN=IGHG1 PE=1 SV=1	11942	File384_Scan10935	controllerType=0 controllerNumber=1 scan=10935	33.8192
09004:3	10	K.GFYPSDIAVEWESNGQPENNYK.T			848.717	3	2544.14	2544.13	0	1.6	254	Specific	233.55	233.55	233.55	5.79	19	>sp|P01857|IGHG1_HUMAN Immunoglobulin heavy constant gamma 1 OS=Homo sapiens GN=IGHG1 PE=1 SV=1	11942	File384_Scan11323	controllerType=0 controllerNumber=1 scan=11323	34.6186
08745:2	10	K.GFYPSDIAVEWESNGQPENNYK.T			1272.57	2	2544.13	2544.13	0	1.2	254	Specific	557.54	557.54	557.54	11.19	19	>sp|P01857|IGHG1_HUMAN Immunoglobulin heavy constant gamma 1 OS=Homo sapiens GN=IGHG1 PE=1 SV=1	11942	File384_Scan11050	controllerType=0 controllerNumber=1 scan=11050	34.0544
08693:3	10	K.GFYPSDIAVEWESNGQPENNYK.T			848.716	3	2544.13	2544.13	0	0.2	254	Specific	600.55	503.75	503.75	13.41	19	>sp|P01857|IGHG1_HUMAN Immunoglobulin heavy constant gamma 1 OS=Homo sapiens GN=IGHG1 PE=1 SV=1	11942	File384_Scan10994	controllerType=0 controllerNumber=1 scan=10994	33.944
11410:2	10	K.TTPPVLDSDGSFFLYSK.L			937.466	2	1873.92	1873.92	0	1.4	276	Specific	30.91	30.91	30.91	1.54	19	>sp|P01857|IGHG1_HUMAN Immunoglobulin heavy constant gamma 1 OS=Homo sapiens GN=IGHG1 PE=1 SV=1	11942	File384_Scan13864	controllerType=0 controllerNumber=1 scan=13864	39.9238
10693:2	10	K.TTPPVLDSDGSFFLYSK.L			937.466	2	1873.92	1873.92	0	1.1	276	Specific	114.21	113.1	113.1	2.68	19	>sp|P01857|IGHG1_HUMAN Immunoglobulin heavy constant gamma 1 OS=Homo sapiens GN=IGHG1 PE=1 SV=1	11942	File384_Scan13108	controllerType=0 controllerNumber=1 scan=13108	38.3485
09972:3	10	K.TTPPVLDSDGSFFLYSK.L			625.315	3	1873.93	1873.92	0	4.3	276	Specific	136.27	136.27	136.27	1.65	19	>sp|P01857|IGHG1_HUMAN Immunoglobulin heavy constant gamma 1 OS=Homo sapiens GN=IGHG1 PE=1 SV=1	11942	File384_Scan12345	controllerType=0 controllerNumber=1 scan=12345	36.798
10586:2	10	K.TTPPVLDSDGSFFLYSK.L			937.465	2	1873.92	1873.92	0	0.8	276	Specific	169.05	166.92	166.92	3.33	19	>sp|P01857|IGHG1_HUMAN Immunoglobulin heavy constant gamma 1 OS=Homo sapiens GN=IGHG1 PE=1 SV=1	11942	File384_Scan12996	controllerType=0 controllerNumber=1 scan=12996	38.1242
11179:2	10	K.TTPPVLDSDGSFFLYSK.L			937.465	2	1873.92	1873.92	0	0.9	276	Specific	170.15	170.15	170.15	3.85	19	>sp|P01857|IGHG1_HUMAN Immunoglobulin heavy constant gamma 1 OS=Homo sapiens GN=IGHG1 PE=1 SV=1	11942	File384_Scan13619	controllerType=0 controllerNumber=1 scan=13619	39.3783
10095:3	10	K.TTPPVLDSDGSFFLYSK.L			625.313	3	1873.93	1873.92	0	2.1	276	Specific	177.7	177.7	177.7	3.01	19	>sp|P01857|IGHG1_HUMAN Immunoglobulin heavy constant gamma 1 OS=Homo sapiens GN=IGHG1 PE=1 SV=1	11942	File384_Scan12474	controllerType=0 controllerNumber=1 scan=12474	37.0594
10921:2	10	K.TTPPVLDSDGSFFLYSK.L			937.466	2	1873.92	1873.92	0	1.3	276	Specific	193.35	193.35	193.35	4.06	19	>sp|P01857|IGHG1_HUMAN Immunoglobulin heavy constant gamma 1 OS=Homo sapiens GN=IGHG1 PE=1 SV=1	11942	File384_Scan13349	controllerType=0 controllerNumber=1 scan=13349	38.8288
09849:3	10	K.TTPPVLDSDGSFFLYSK.L			625.313	3	1873.92	1873.92	0	1.3	276	Specific	219.65	219.65	219.65	4.54	19	>sp|P01857|IGHG1_HUMAN Immunoglobulin heavy constant gamma 1 OS=Homo sapiens GN=IGHG1 PE=1 SV=1	11942	File384_Scan12216	controllerType=0 controllerNumber=1 scan=12216	36.5179
10282:2	10	K.TTPPVLDSDGSFFLYSK.L			937.466	2	1873.92	1873.92	0	1.7	276	Specific	228.11	223.11	223.11	5.78	19	>sp|P01857|IGHG1_HUMAN Immunoglobulin heavy constant gamma 1 OS=Homo sapiens GN=IGHG1 PE=1 SV=1	11942	File384_Scan12677	controllerType=0 controllerNumber=1 scan=12677	37.4858
10383:2	10	K.TTPPVLDSDGSFFLYSK.L			937.465	2	1873.92	1873.92	0	0.6	276	Specific	250.1	250.1	250.1	6.26	19	>sp|P01857|IGHG1_HUMAN Immunoglobulin heavy constant gamma 1 OS=Homo sapiens GN=IGHG1 PE=1 SV=1	11942	File384_Scan12783	controllerType=0 controllerNumber=1 scan=12783	37.6984
10485:2	10	K.TTPPVLDSDGSFFLYSK.L			937.466	2	1873.92	1873.92	0	1.4	276	Specific	277.17	275.16	275.16	6.39	19	>sp|P01857|IGHG1_HUMAN Immunoglobulin heavy constant gamma 1 OS=Homo sapiens GN=IGHG1 PE=1 SV=1	11942	File384_Scan12890	controllerType=0 controllerNumber=1 scan=12890	37.9137
09736:3	10	K.TTPPVLDSDGSFFLYSK.L			625.313	3	1873.92	1873.92	0	1.1	276	Specific	287.86	287.86	287.86	6.7	19	>sp|P01857|IGHG1_HUMAN Immunoglobulin heavy constant gamma 1 OS=Homo sapiens GN=IGHG1 PE=1 SV=1	11942	File384_Scan12094	controllerType=0 controllerNumber=1 scan=12094	36.2616
09566:2	10	K.TTPPVLDSDGSFFLYSK.L			937.467	2	1873.93	1873.92	0	2.9	276	Specific	427.78	335.33	335.33	7.09	19	>sp|P01857|IGHG1_HUMAN Immunoglobulin heavy constant gamma 1 OS=Homo sapiens GN=IGHG1 PE=1 SV=1	11942	File384_Scan11913	controllerType=0 controllerNumber=1 scan=11913	35.8829
10080:2	10	K.TTPPVLDSDGSFFLYSK.L			937.466	2	1873.93	1873.92	0	1.9	276	Specific	433.57	433.57	433.57	9.89	19	>sp|P01857|IGHG1_HUMAN Immunoglobulin heavy constant gamma 1 OS=Homo sapiens GN=IGHG1 PE=1 SV=1	11942	File384_Scan12459	controllerType=0 controllerNumber=1 scan=12459	37.0327
10181:2	10	K.TTPPVLDSDGSFFLYSK.L			937.466	2	1873.92	1873.92	0	1.4	276	Specific	462.42	456.73	456.73	10.11	19	>sp|P01857|IGHG1_HUMAN Immunoglobulin heavy constant gamma 1 OS=Homo sapiens GN=IGHG1 PE=1 SV=1	11942	File384_Scan12569	controllerType=0 controllerNumber=1 scan=12569	37.2658
09471:2	10	K.TTPPVLDSDGSFFLYSK.L			937.467	2	1873.93	1873.92	0	3.1	276	Specific	472.99	442.66	442.66	9.6	19	>sp|P01857|IGHG1_HUMAN Immunoglobulin heavy constant gamma 1 OS=Homo sapiens GN=IGHG1 PE=1 SV=1	11942	File384_Scan11813	controllerType=0 controllerNumber=1 scan=11813	35.6691
09367:2	10	K.TTPPVLDSDGSFFLYSK.L			937.466	2	1873.93	1873.92	0	1.9	276	Specific	486.27	407.7	407.7	9.46	19	>sp|P01857|IGHG1_HUMAN Immunoglobulin heavy constant gamma 1 OS=Homo sapiens GN=IGHG1 PE=1 SV=1	11942	File384_Scan11704	controllerType=0 controllerNumber=1 scan=11704	35.4378
09979:2	10	K.TTPPVLDSDGSFFLYSK.L			937.466	2	1873.92	1873.92	0	1.3	276	Specific	487.12	409.71	409.71	10.15	19	>sp|P01857|IGHG1_HUMAN Immunoglobulin heavy constant gamma 1 OS=Homo sapiens GN=IGHG1 PE=1 SV=1	11942	File384_Scan12353	controllerType=0 controllerNumber=1 scan=12353	36.8149
09874:2	10	K.TTPPVLDSDGSFFLYSK.L			937.466	2	1873.92	1873.92	0	1	276	Specific	492.89	485.88	485.88	10	19	>sp|P01857|IGHG1_HUMAN Immunoglobulin heavy constant gamma 1 OS=Homo sapiens GN=IGHG1 PE=1 SV=1	11942	File384_Scan12243	controllerType=0 controllerNumber=1 scan=12243	36.5789
09768:2	10	K.TTPPVLDSDGSFFLYSK.L			937.465	2	1873.92	1873.92	0	0.8	276	Specific	494.28	424.56	424.56	10	19	>sp|P01857|IGHG1_HUMAN Immunoglobulin heavy constant gamma 1 OS=Homo sapiens GN=IGHG1 PE=1 SV=1	11942	File384_Scan12128	controllerType=0 controllerNumber=1 scan=12128	36.3279
09666:2	10	K.TTPPVLDSDGSFFLYSK.L			937.47	2	1873.93	1873.92	0	5.9	276	Specific	514.6	422.39	422.39	8.36	19	>sp|P01857|IGHG1_HUMAN Immunoglobulin heavy constant gamma 1 OS=Homo sapiens GN=IGHG1 PE=1 SV=1	11942	File384_Scan12019	controllerType=0 controllerNumber=1 scan=12019	36.1012
09626:3	10	K.TTPPVLDSDGSFFLYSK.L			625.313	3	1873.92	1873.92	0	1	276	Specific	650.85	643.14	643.14	13.76	19	>sp|P01857|IGHG1_HUMAN Immunoglobulin heavy constant gamma 1 OS=Homo sapiens GN=IGHG1 PE=1 SV=1	11942	File384_Scan11977	controllerType=0 controllerNumber=1 scan=11977	36.017
09530:3	10	K.TTPPVLDSDGSFFLYSK.L			625.313	3	1873.93	1873.92	0	2	276	Specific	670.25	606.36	606.36	13.9	19	>sp|P01857|IGHG1_HUMAN Immunoglobulin heavy constant gamma 1 OS=Homo sapiens GN=IGHG1 PE=1 SV=1	11942	File384_Scan11875	controllerType=0 controllerNumber=1 scan=11875	35.8108
04786:2	11	R.SGGGFSSGSAGIINYQR.R			829.401	2	1657.8	1657.79	0	1.3	13	Specific	280.6	258.01	258.01	6.35	27	>sp|P04264|K2C1_HUMAN Keratin, type II cytoskeletal 1 OS=Homo sapiens GN=KRT1 PE=1 SV=6	12359	File384_Scan6881	controllerType=0 controllerNumber=1 scan=6881	25.0302
04188:2	11	R.FSSC[+57.021]GGGGGSFGAGGGFGSR.S		C[+57]	883.372	2	1765.74	1765.73	0	1.2	46	Specific	268.25	268.25	268.25	7.26	27	>sp|P04264|K2C1_HUMAN Keratin, type II cytoskeletal 1 OS=Homo sapiens GN=KRT1 PE=1 SV=6	12359	File384_Scan6172	controllerType=0 controllerNumber=1 scan=6172	23.271
03795:2	11	R.SLVNLGGSK.S			437.753	2	874.499	874.499	0	0.1	66	Specific	471.09	171.52	171.52	7.04	27	>sp|P04264|K2C1_HUMAN Keratin, type II cytoskeletal 1 OS=Homo sapiens GN=KRT1 PE=1 SV=6	12359	File384_Scan5667	controllerType=0 controllerNumber=1 scan=5667	22.044
03868:2	11	K.SISISVAR.G			416.748	2	832.489	832.489	0	0.1	75	Specific	413.06	138.5	138.5	5.93	27	>sp|P04264|K2C1_HUMAN Keratin, type II cytoskeletal 1 OS=Homo sapiens GN=KRT1 PE=1 SV=6	12359	File384_Scan5760	controllerType=0 controllerNumber=1 scan=5760	22.2583
07607:2	11	K.SLNNQFASFIDK.V			692.349	2	1383.69	1383.69	0	0.5	186	Specific	639.98	483.44	483.44	12.61	27	>sp|P04264|K2C1_HUMAN Keratin, type II cytoskeletal 1 OS=Homo sapiens GN=KRT1 PE=1 SV=6	12359	File384_Scan9848	controllerType=0 controllerNumber=1 scan=9848	31.6368
04066:2	11	R.FLEQQNQVLQTK.W			738.397	2	1475.79	1475.79	0	0.7	200	Specific	742.6	453.45	453.45	14.61	27	>sp|P04264|K2C1_HUMAN Keratin, type II cytoskeletal 1 OS=Homo sapiens GN=KRT1 PE=1 SV=6	12359	File384_Scan6010	controllerType=0 controllerNumber=1 scan=6010	22.8756
07368:2	11	K.WELLQQVDTSTR.T			738.379	2	1475.75	1475.75	0	1.5	212	Specific	695.61	549.62	549.62	13.75	27	>sp|P04264|K2C1_HUMAN Keratin, type II cytoskeletal 1 OS=Homo sapiens GN=KRT1 PE=1 SV=6	12359	File384_Scan9595	controllerType=0 controllerNumber=1 scan=9595	31.1171
11130:3	11	R.THNLEPYFESFINNLR.R			665.331	3	1993.98	1993.98	0	1.3	224	Specific	142.34	142.34	142.34	3.67	27	>sp|P04264|K2C1_HUMAN Keratin, type II cytoskeletal 1 OS=Homo sapiens GN=KRT1 PE=1 SV=6	12359	File384_Scan13568	controllerType=0 controllerNumber=1 scan=13568	39.2574
11005:3	11	R.THNLEPYFESFINNLR.R			665.332	3	1993.98	1993.98	0	2.4	224	Specific	250.94	250.94	250.94	5.54	27	>sp|P04264|K2C1_HUMAN Keratin, type II cytoskeletal 1 OS=Homo sapiens GN=KRT1 PE=1 SV=6	12359	File384_Scan13437	controllerType=0 controllerNumber=1 scan=13437	38.9959
10864:3	11	R.THNLEPYFESFINNLR.R			665.331	3	1993.98	1993.98	0	0.7	224	Specific	475.52	475.52	475.52	9.96	27	>sp|P04264|K2C1_HUMAN Keratin, type II cytoskeletal 1 OS=Homo sapiens GN=KRT1 PE=1 SV=6	12359	File384_Scan13289	controllerType=0 controllerNumber=1 scan=13289	38.7077
01152:2	11	K.NM[+15.995]QDM[+15.995]VEDYR.N		M[+16]*2	666.764	2	1332.52	1332.52	0	0.8	258	Specific	297.01	297.01	297.01	6.43	27	>sp|P04264|K2C1_HUMAN Keratin, type II cytoskeletal 1 OS=Homo sapiens GN=KRT1 PE=1 SV=6	12359	File384_Scan2858	controllerType=0 controllerNumber=1 scan=2858	15.9144
04605:2	11	R.TNAENEFVTIK.K			633.322	2	1265.64	1265.64	0	0.1	278	Specific	490.43	286.34	286.34	8.07	27	>sp|P04264|K2C1_HUMAN Keratin, type II cytoskeletal 1 OS=Homo sapiens GN=KRT1 PE=1 SV=6	12359	File384_Scan6689	controllerType=0 controllerNumber=1 scan=6689	24.5592
02933:3	11	R.TNAENEFVTIKK.D			465.249	3	1393.73	1393.73	0	0.1	278	Specific	298.47	177.09	177.09	4.54	27	>sp|P04264|K2C1_HUMAN Keratin, type II cytoskeletal 1 OS=Homo sapiens GN=KRT1 PE=1 SV=6	12359	File384_Scan4724	controllerType=0 controllerNumber=1 scan=4724	19.9768
00845:2	11	K.DVDGAYM[+15.995]TK.V		M[+16]	508.224	2	1015.44	1015.44	0	0.7	290	Specific	357.85	147.39	147.39	5.71	27	>sp|P04264|K2C1_HUMAN Keratin, type II cytoskeletal 1 OS=Homo sapiens GN=KRT1 PE=1 SV=6	12359	File384_Scan2537	controllerType=0 controllerNumber=1 scan=2537	15.2185
11119:2	11	R.SLDLDSIIAEVK.A			651.862	2	1302.72	1302.72	0	0.9	344	Specific	660.68	344.45	344.45	12.15	27	>sp|P04264|K2C1_HUMAN Keratin, type II cytoskeletal 1 OS=Homo sapiens GN=KRT1 PE=1 SV=6	12359	File384_Scan13557	controllerType=0 controllerNumber=1 scan=13557	39.2329
11017:2	11	R.SLDLDSIIAEVK.A			651.862	2	1302.72	1302.72	0	0.6	344	Specific	746.38	340.15	340.15	13.12	27	>sp|P04264|K2C1_HUMAN Keratin, type II cytoskeletal 1 OS=Homo sapiens GN=KRT1 PE=1 SV=6	12359	File384_Scan13449	controllerType=0 controllerNumber=1 scan=13449	39.0184
01351:2	11	K.AQYEDIAQK.S			533.264	2	1065.52	1065.52	0	0.4	356	Specific	578.68	171.46	171.46	8.32	27	>sp|P04264|K2C1_HUMAN Keratin, type II cytoskeletal 1 OS=Homo sapiens GN=KRT1 PE=1 SV=6	12359	File384_Scan3067	controllerType=0 controllerNumber=1 scan=3067	16.3376
00896:3	11	K.SKAEAESLYQSK.Y			447.561	3	1340.67	1340.67	0	0.2	365	Specific	335.38	260.14	260.14	5.37	27	>sp|P04264|K2C1_HUMAN Keratin, type II cytoskeletal 1 OS=Homo sapiens GN=KRT1 PE=1 SV=6	12359	File384_Scan2591	controllerType=0 controllerNumber=1 scan=2591	15.3336
00895:2	11	K.SKAEAESLYQSK.Y			670.839	2	1340.67	1340.67	0	0.7	365	Specific	677.4	508.82	508.82	12.38	27	>sp|P04264|K2C1_HUMAN Keratin, type II cytoskeletal 1 OS=Homo sapiens GN=KRT1 PE=1 SV=6	12359	File384_Scan2590	controllerType=0 controllerNumber=1 scan=2590	15.3321
01513:2	11	K.AEAESLYQSK.Y			563.275	2	1125.54	1125.54	0	1	367	Specific	597.68	353.27	353.27	10.02	27	>sp|P04264|K2C1_HUMAN Keratin, type II cytoskeletal 1 OS=Homo sapiens GN=KRT1 PE=1 SV=6	12359	File384_Scan3239	controllerType=0 controllerNumber=1 scan=3239	16.6863
04255:2	11	K.YEELQITAGR.H			590.304	2	1179.6	1179.6	0	0	377	Specific	690.3	321.44	321.44	11.76	27	>sp|P04264|K2C1_HUMAN Keratin, type II cytoskeletal 1 OS=Homo sapiens GN=KRT1 PE=1 SV=6	12359	File384_Scan6270	controllerType=0 controllerNumber=1 scan=6270	23.5162
04146:2	11	K.IEISELNR.V			487.269	2	973.532	973.531	0	0.3	396	Specific	543.33	68.27	68.27	5.45	27	>sp|P04264|K2C1_HUMAN Keratin, type II cytoskeletal 1 OS=Homo sapiens GN=KRT1 PE=1 SV=6	12359	File384_Scan6118	controllerType=0 controllerNumber=1 scan=6118	23.1464
00929:2	11	R.LRSEIDNVK.K			537.301	2	1073.6	1073.59	0	0.4	408	Specific	446.9	185.75	185.75	4.52	27	>sp|P04264|K2C1_HUMAN Keratin, type II cytoskeletal 1 OS=Homo sapiens GN=KRT1 PE=1 SV=6	12359	File384_Scan2625	controllerType=0 controllerNumber=1 scan=2625	15.4028
00500:3	11	R.LRSEIDNVKK.Q			401.235	3	1201.69	1201.69	0	-0.3	408	Specific	282.11	75.89	75.89	1.79	27	>sp|P04264|K2C1_HUMAN Keratin, type II cytoskeletal 1 OS=Homo sapiens GN=KRT1 PE=1 SV=6	12359	File384_Scan2178	controllerType=0 controllerNumber=1 scan=2178	14.3881
00795:2	11	R.SEIDNVK.K			402.709	2	804.41	804.41	0	0	410	Specific	161.01	23.52	23.52	0.66	27	>sp|P04264|K2C1_HUMAN Keratin, type II cytoskeletal 1 OS=Homo sapiens GN=KRT1 PE=1 SV=6	12359	File384_Scan2485	controllerType=0 controllerNumber=1 scan=2485	15.1147
04542:2	11	K.QISNLQQSISDAEQR.G			858.929	2	1716.85	1716.85	0	0.3	418	Specific	869.87	730.31	730.31	17.4	27	>sp|P04264|K2C1_HUMAN Keratin, type II cytoskeletal 1 OS=Homo sapiens GN=KRT1 PE=1 SV=6	12359	File384_Scan6615	controllerType=0 controllerNumber=1 scan=6615	24.3722
05713:2	11	K.LNDLEDALQQAK.E			679.352	2	1357.7	1357.7	0	1.2	444	Specific	660.3	486.73	486.73	13.75	27	>sp|P04264|K2C1_HUMAN Keratin, type II cytoskeletal 1 OS=Homo sapiens GN=KRT1 PE=1 SV=6	12359	File384_Scan7861	controllerType=0 controllerNumber=1 scan=7861	27.3951
01509:2	11	R.DYQELM[+15.995]NTK.L		M[+16]	579.261	2	1157.52	1157.51	0	0.8	464	Specific	460.08	266.95	266.95	7.2	27	>sp|P04264|K2C1_HUMAN Keratin, type II cytoskeletal 1 OS=Homo sapiens GN=KRT1 PE=1 SV=6	12359	File384_Scan3235	controllerType=0 controllerNumber=1 scan=3235	16.6794
09097:2	11	K.LALDLEIATYR.T			639.359	2	1277.71	1277.71	0	0.3	473	Specific	449.02	281.02	281.02	7.92	27	>sp|P04264|K2C1_HUMAN Keratin, type II cytoskeletal 1 OS=Homo sapiens GN=KRT1 PE=1 SV=6	12359	File384_Scan11421	controllerType=0 controllerNumber=1 scan=11421	34.8331
02216:2	11	R.TLLEGEESR.M			517.262	2	1033.52	1033.52	0	0.7	484	Specific	556.95	286.82	286.82	8.5	27	>sp|P04264|K2C1_HUMAN Keratin, type II cytoskeletal 1 OS=Homo sapiens GN=KRT1 PE=1 SV=6	12359	File384_Scan3976	controllerType=0 controllerNumber=1 scan=3976	18.2408
03325:3	11	R.M[+15.995]SGEC[+57.021]APNVSVSVSTSHTTISGGGSR.G		C[+57], M[+16]	861.06	3	2581.16	2581.16	0	1.1	493	Specific	259.05	259.05	259.05	7.12	27	>sp|P04264|K2C1_HUMAN Keratin, type II cytoskeletal 1 OS=Homo sapiens GN=KRT1 PE=1 SV=6	12359	File384_Scan5134	controllerType=0 controllerNumber=1 scan=5134	20.8699
03865:4	12	K.REEAPSLRPAPPPISGGGYR.A			527.532	4	2107.11	2107.1	0	0.6	53	Specific	230.46	186	186	5.95	20	>sp|P02675|FIBB_HUMAN Fibrinogen beta chain OS=Homo sapiens GN=FGB PE=1 SV=2	6387	File384_Scan5756	controllerType=0 controllerNumber=1 scan=5756	22.2458
04442:3	12	R.EEAPSLRPAPPPISGGGYR.A			651.006	3	1951	1951	0	0.1	54	Specific	910.39	832.09	832.09	19.4	20	>sp|P02675|FIBB_HUMAN Fibrinogen beta chain OS=Homo sapiens GN=FGB PE=1 SV=2	6387	File384_Scan6505	controllerType=0 controllerNumber=1 scan=6505	24.1042
03062:2	12	R.PAPPPISGGGYR.A			584.809	2	1168.61	1168.61	0	0.6	61	Specific	498.46	377.49	377.49	8.69	20	>sp|P02675|FIBB_HUMAN Fibrinogen beta chain OS=Homo sapiens GN=FGB PE=1 SV=2	6387	File384_Scan4859	controllerType=0 controllerNumber=1 scan=4859	20.2856
08925:3	12	R.NSVDELNNNVEAVSQTSSSSFQYM[+15.995]YLLK.D		M[+16]	1061.83	3	3183.48	3183.48	0	0.1	125	Specific	142.18	142.18	142.18	4.54	20	>sp|P02675|FIBB_HUMAN Fibrinogen beta chain OS=Homo sapiens GN=FGB PE=1 SV=2	6387	File384_Scan11241	controllerType=0 controllerNumber=1 scan=11241	34.4468
05501:2	12	K.DNENVVNEYSSELEK.H			884.898	2	1768.79	1768.79	0	0.3	164	Specific	706.22	593.51	593.51	14.4	20	>sp|P02675|FIBB_HUMAN Fibrinogen beta chain OS=Homo sapiens GN=FGB PE=1 SV=2	6387	File384_Scan7628	controllerType=0 controllerNumber=1 scan=7628	26.8374
05841:2	12	K.HQLYIDETVNSNIPTNLR.V			1064.05	2	2127.09	2127.08	0	1.4	179	Specific	343.68	343.68	343.68	8.19	20	>sp|P02675|FIBB_HUMAN Fibrinogen beta chain OS=Homo sapiens GN=FGB PE=1 SV=2	6387	File384_Scan7996	controllerType=0 controllerNumber=1 scan=7996	27.7177
05802:3	12	K.HQLYIDETVNSNIPTNLR.V			709.699	3	2127.08	2127.08	0	-0.1	179	Specific	795.95	795.95	795.95	16	20	>sp|P02675|FIBB_HUMAN Fibrinogen beta chain OS=Homo sapiens GN=FGB PE=1 SV=2	6387	File384_Scan7956	controllerType=0 controllerNumber=1 scan=7956	27.6278
05041:2	12	R.SILENLR.S			422.748	2	844.489	844.489	0	-0.2	200	Specific	319.57	12.24	12.24	2.06	20	>sp|P02675|FIBB_HUMAN Fibrinogen beta chain OS=Homo sapiens GN=FGB PE=1 SV=2	6387	File384_Scan7146	controllerType=0 controllerNumber=1 scan=7146	25.6823
04928:2	12	R.SILENLR.S			422.748	2	844.489	844.489	0	-0.1	200	Specific	415.22	33.14	33.14	3.15	20	>sp|P02675|FIBB_HUMAN Fibrinogen beta chain OS=Homo sapiens GN=FGB PE=1 SV=2	6387	File384_Scan7029	controllerType=0 controllerNumber=1 scan=7029	25.4039
01857:2	12	K.LESDVSAQM[+15.995]EYC[+57.021]R.T		C[+57], M[+16]	802.341	2	1603.67	1603.67	0	0.7	212	Specific	99.15	99.15	99.15	2.37	20	>sp|P02675|FIBB_HUMAN Fibrinogen beta chain OS=Homo sapiens GN=FGB PE=1 SV=2	6387	File384_Scan3600	controllerType=0 controllerNumber=1 scan=3600	17.4213
01743:2	12	K.LESDVSAQM[+15.995]EYC[+57.021]R.T		C[+57], M[+16]	802.341	2	1603.67	1603.67	0	0.7	212	Specific	560.08	512.82	512.82	10.31	20	>sp|P02675|FIBB_HUMAN Fibrinogen beta chain OS=Homo sapiens GN=FGB PE=1 SV=2	6387	File384_Scan3480	controllerType=0 controllerNumber=1 scan=3480	17.1764
04603:2	12	R.TPC[+57.021]TVSC[+57.021]NIPVVSGK.E		C[+57]*2	809.9	2	1618.79	1618.79	0	0.5	225	Specific	742.36	676.04	676.04	14.4	20	>sp|P02675|FIBB_HUMAN Fibrinogen beta chain OS=Homo sapiens GN=FGB PE=1 SV=2	6387	File384_Scan6687	controllerType=0 controllerNumber=1 scan=6687	24.5561
02199:2	12	K.EC[+57.021]EEIIR.K		C[+57]	474.726	2	948.445	948.446	0	-0.1	240	Specific	315.71	71.96	71.96	3.52	20	>sp|P02675|FIBB_HUMAN Fibrinogen beta chain OS=Homo sapiens GN=FGB PE=1 SV=2	6387	File384_Scan3958	controllerType=0 controllerNumber=1 scan=3958	18.1996
02080:2	12	K.EC[+57.021]EEIIR.K		C[+57]	474.726	2	948.446	948.446	0	0.3	240	Specific	473.31	77.48	77.48	5.04	20	>sp|P02675|FIBB_HUMAN Fibrinogen beta chain OS=Homo sapiens GN=FGB PE=1 SV=2	6387	File384_Scan3834	controllerType=0 controllerNumber=1 scan=3834	17.9211
04080:4	12	R.KGGETSEM[+15.995]YLIQPDSSVKPYR.V		M[+16]	601.049	4	2401.17	2401.17	0	1	247	Specific	480.86	480.86	480.86	10.6	20	>sp|P02675|FIBB_HUMAN Fibrinogen beta chain OS=Homo sapiens GN=FGB PE=1 SV=2	6387	File384_Scan6029	controllerType=0 controllerNumber=1 scan=6029	22.9155
03973:4	12	R.KGGETSEM[+15.995]YLIQPDSSVKPYR.V		M[+16]	601.047	4	2401.17	2401.17	0	-1.3	247	Specific	827.69	827.69	827.69	16.81	20	>sp|P02675|FIBB_HUMAN Fibrinogen beta chain OS=Homo sapiens GN=FGB PE=1 SV=2	6387	File384_Scan5892	controllerType=0 controllerNumber=1 scan=5892	22.572
04606:3	12	K.GGETSEM[+15.995]YLIQPDSSVKPYR.V		M[+16]	758.364	3	2273.08	2273.08	0	0.3	248	Specific	899.63	899.63	899.63	18.27	20	>sp|P02675|FIBB_HUMAN Fibrinogen beta chain OS=Homo sapiens GN=FGB PE=1 SV=2	6387	File384_Scan6690	controllerType=0 controllerNumber=1 scan=6690	24.5608
02191:2	12	R.QDGSVDFGR.K			490.726	2	980.444	980.443	0	0.5	286	Specific	493.76	330	330	7.51	20	>sp|P02675|FIBB_HUMAN Fibrinogen beta chain OS=Homo sapiens GN=FGB PE=1 SV=2	6387	File384_Scan3950	controllerType=0 controllerNumber=1 scan=3950	18.1817
02079:2	12	R.QDGSVDFGR.K			490.726	2	980.444	980.443	0	0.5	286	Specific	578.93	374.68	374.68	9.11	20	>sp|P02675|FIBB_HUMAN Fibrinogen beta chain OS=Homo sapiens GN=FGB PE=1 SV=2	6387	File384_Scan3833	controllerType=0 controllerNumber=1 scan=3833	17.9191
01974:2	12	R.QDGSVDFGR.K			490.725	2	980.443	980.443	0	-0.2	286	Specific	588.89	353.69	353.69	9.8	20	>sp|P02675|FIBB_HUMAN Fibrinogen beta chain OS=Homo sapiens GN=FGB PE=1 SV=2	6387	File384_Scan3723	controllerType=0 controllerNumber=1 scan=3723	17.6793
02055:2	12	K.QGFGNVATNTDGK.N			654.813	2	1308.62	1308.62	0	0.5	301	Specific	394.37	302.11	302.11	6.28	20	>sp|P02675|FIBB_HUMAN Fibrinogen beta chain OS=Homo sapiens GN=FGB PE=1 SV=2	6387	File384_Scan3808	controllerType=0 controllerNumber=1 scan=3808	17.8616
02180:2	12	K.QGFGNVATNTDGK.N			654.811	2	1308.62	1308.62	0	-1.9	301	Specific	449.43	393.85	393.85	8.78	20	>sp|P02675|FIBB_HUMAN Fibrinogen beta chain OS=Homo sapiens GN=FGB PE=1 SV=2	6387	File384_Scan3938	controllerType=0 controllerNumber=1 scan=3938	18.1501
01951:2	12	K.QGFGNVATNTDGK.N			654.812	2	1308.62	1308.62	0	-0.1	301	Specific	686.88	493.18	493.18	13.2	20	>sp|P02675|FIBB_HUMAN Fibrinogen beta chain OS=Homo sapiens GN=FGB PE=1 SV=2	6387	File384_Scan3699	controllerType=0 controllerNumber=1 scan=3699	17.6266
08081:2	12	K.NYC[+57.021]GLPGEYWLGNDK.I		C[+57]	893.399	2	1785.79	1785.79	0	0.7	314	Specific	404.37	368.82	368.82	7.12	20	>sp|P02675|FIBB_HUMAN Fibrinogen beta chain OS=Homo sapiens GN=FGB PE=1 SV=2	6387	File384_Scan10345	controllerType=0 controllerNumber=1 scan=10345	32.6513
08027:3	12	R.M[+15.995]GPTELLIEM[+15.995]EDWK.G		M[+16]*2	575.269	3	1723.79	1723.79	0	0.5	335	Specific	432.26	333.28	333.28	6.94	20	>sp|P02675|FIBB_HUMAN Fibrinogen beta chain OS=Homo sapiens GN=FGB PE=1 SV=2	6387	File384_Scan10288	controllerType=0 controllerNumber=1 scan=10288	32.5292
07995:2	12	R.M[+15.995]GPTELLIEM[+15.995]EDWK.G		M[+16]*2	862.4	2	1723.79	1723.79	0	0.5	335	Specific	554.98	397.76	397.76	10.14	20	>sp|P02675|FIBB_HUMAN Fibrinogen beta chain OS=Homo sapiens GN=FGB PE=1 SV=2	6387	File384_Scan10255	controllerType=0 controllerNumber=1 scan=10255	32.4653
02024:2	12	K.AHYGGFTVQNEANK.Y			768.366	2	1535.72	1535.72	0	0.2	354	Specific	199.44	93.64	93.64	2.28	20	>sp|P02675|FIBB_HUMAN Fibrinogen beta chain OS=Homo sapiens GN=FGB PE=1 SV=2	6387	File384_Scan3775	controllerType=0 controllerNumber=1 scan=3775	17.7889
02473:3	12	K.AHYGGFTVQNEANK.Y			512.579	3	1535.72	1535.72	0	0	354	Specific	329.17	303.8	303.8	6.2	20	>sp|P02675|FIBB_HUMAN Fibrinogen beta chain OS=Homo sapiens GN=FGB PE=1 SV=2	6387	File384_Scan4243	controllerType=0 controllerNumber=1 scan=4243	18.889
01902:2	12	K.AHYGGFTVQNEANK.Y			768.366	2	1535.73	1535.72	0	1.2	354	Specific	462.32	362.63	362.63	8.04	20	>sp|P02675|FIBB_HUMAN Fibrinogen beta chain OS=Homo sapiens GN=FGB PE=1 SV=2	6387	File384_Scan3647	controllerType=0 controllerNumber=1 scan=3647	17.5179
02350:3	12	K.AHYGGFTVQNEANK.Y			512.58	3	1535.72	1535.72	0	0.1	354	Specific	554.87	532.66	532.66	10.14	20	>sp|P02675|FIBB_HUMAN Fibrinogen beta chain OS=Homo sapiens GN=FGB PE=1 SV=2	6387	File384_Scan4115	controllerType=0 controllerNumber=1 scan=4115	18.5971
02189:3	12	K.AHYGGFTVQNEANK.Y			512.58	3	1535.72	1535.72	0	0.3	354	Specific	582.19	550.48	550.48	11.42	20	>sp|P02675|FIBB_HUMAN Fibrinogen beta chain OS=Homo sapiens GN=FGB PE=1 SV=2	6387	File384_Scan3948	controllerType=0 controllerNumber=1 scan=3948	18.1786
02082:3	12	K.AHYGGFTVQNEANK.Y			512.58	3	1535.72	1535.72	0	0.4	354	Specific	625.55	564.57	564.57	12.42	20	>sp|P02675|FIBB_HUMAN Fibrinogen beta chain OS=Homo sapiens GN=FGB PE=1 SV=2	6387	File384_Scan3836	controllerType=0 controllerNumber=1 scan=3836	17.9242
01859:3	12	K.AHYGGFTVQNEANK.Y			512.58	3	1535.72	1535.72	0	0.2	354	Specific	644.48	566.36	566.36	12.42	20	>sp|P02675|FIBB_HUMAN Fibrinogen beta chain OS=Homo sapiens GN=FGB PE=1 SV=2	6387	File384_Scan3602	controllerType=0 controllerNumber=1 scan=3602	17.4244
01971:3	12	K.AHYGGFTVQNEANK.Y			512.58	3	1535.72	1535.72	0	0.4	354	Specific	676.59	573.87	573.87	13.42	20	>sp|P02675|FIBB_HUMAN Fibrinogen beta chain OS=Homo sapiens GN=FGB PE=1 SV=2	6387	File384_Scan3720	controllerType=0 controllerNumber=1 scan=3720	17.6709
02012:2	12	K.YQISVNK.Y			426.235	2	851.462	851.462	0	0.1	368	Specific	276.52	121.19	121.19	2.9	20	>sp|P02675|FIBB_HUMAN Fibrinogen beta chain OS=Homo sapiens GN=FGB PE=1 SV=2	6387	File384_Scan3763	controllerType=0 controllerNumber=1 scan=3763	17.7644
01914:2	12	K.YQISVNK.Y			426.235	2	851.462	851.462	0	-0.1	368	Specific	417.27	175.17	175.17	5.4	20	>sp|P02675|FIBB_HUMAN Fibrinogen beta chain OS=Homo sapiens GN=FGB PE=1 SV=2	6387	File384_Scan3660	controllerType=0 controllerNumber=1 scan=3660	17.5453
04323:3	12	R.TM[+15.995]TIHNGM[+15.995]FFSTYDR.D		M[+16]*2	618.272	3	1852.8	1852.8	0	0.7	396	Specific	228.97	226.73	226.73	4.69	20	>sp|P02675|FIBB_HUMAN Fibrinogen beta chain OS=Homo sapiens GN=FGB PE=1 SV=2	6387	File384_Scan6366	controllerType=0 controllerNumber=1 scan=6366	23.7465
06590:2	12	K.IRPFFPQ.Q			452.756	2	904.504	904.504	0	0.1	484	CRagged	349.81	211.03	211.03	6.7	20	>sp|P02675|FIBB_HUMAN Fibrinogen beta chain OS=Homo sapiens GN=FGB PE=1 SV=2	6387	File384_Scan8779	controllerType=0 controllerNumber=1 scan=8779	29.4354
06096:2	12	K.IRPFFPQQ.-			516.785	2	1032.56	1032.56	0	1	484	CRagged	324.63	254.75	254.75	5.49	20	>sp|P02675|FIBB_HUMAN Fibrinogen beta chain OS=Homo sapiens GN=FGB PE=1 SV=2	6387	File384_Scan8262	controllerType=0 controllerNumber=1 scan=8262	28.3352
05975:2	12	K.IRPFFPQQ.-			516.785	2	1032.56	1032.56	0	0.4	484	CRagged	474.99	336.46	336.46	7.87	20	>sp|P02675|FIBB_HUMAN Fibrinogen beta chain OS=Homo sapiens GN=FGB PE=1 SV=2	6387	File384_Scan8136	controllerType=0 controllerNumber=1 scan=8136	28.052
00897:2	13	R.QQTEWQSGQR.W			624.292	2	1247.58	1247.58	0	0.7	34	Specific	642.08	526.83	526.83	12.47	21	>sp|P02649|APOE_HUMAN Apolipoprotein E OS=Homo sapiens GN=APOE PE=1 SV=1	988	File384_Scan2592	controllerType=0 controllerNumber=1 scan=2592	15.3359
06815:2	13	R.WELALGR.F			422.737	2	844.467	844.468	0	-0.5	44	Specific	372.86	148.4	148.4	5.33	21	>sp|P02649|APOE_HUMAN Apolipoprotein E OS=Homo sapiens GN=APOE PE=1 SV=1	988	File384_Scan9015	controllerType=0 controllerNumber=1 scan=9015	29.9069
07338:2	13	R.FWDYLR.W			450.224	2	899.441	899.441	0	0.4	51	Specific	337.2	16.78	16.78	2.23	21	>sp|P02649|APOE_HUMAN Apolipoprotein E OS=Homo sapiens GN=APOE PE=1 SV=1	988	File384_Scan9563	controllerType=0 controllerNumber=1 scan=9563	31.049
11383:3	13	R.WVQTLSEQVQEELLSSQVTQELR.A			910.801	3	2730.39	2730.39	0	-1.8	57	Specific	112.31	112.31	112.31	4.83	21	>sp|P02649|APOE_HUMAN Apolipoprotein E OS=Homo sapiens GN=APOE PE=1 SV=1	988	File384_Scan13836	controllerType=0 controllerNumber=1 scan=13836	39.8594
11395:2	13	R.WVQTLSEQVQEELLSSQVTQELR.A			1365.7	2	2730.4	2730.39	0	0.9	57	Specific	334.19	334.19	334.19	8.18	21	>sp|P02649|APOE_HUMAN Apolipoprotein E OS=Homo sapiens GN=APOE PE=1 SV=1	988	File384_Scan13848	controllerType=0 controllerNumber=1 scan=13848	39.8875
00341:2	13	R.ALM[+15.995]DETM[+15.995]K.E		M[+16]*2	485.715	2	970.422	970.422	0	0.4	80	Specific	220.1	220.1	220.1	4.45	21	>sp|P02649|APOE_HUMAN Apolipoprotein E OS=Homo sapiens GN=APOE PE=1 SV=1	988	File384_Scan2012	controllerType=0 controllerNumber=1 scan=2012	14.0119
05117:2	13	K.SELEEQLTPVAEETR.A			865.927	2	1730.85	1730.84	0	1.5	94	Specific	847.37	699.84	699.84	16.54	21	>sp|P02649|APOE_HUMAN Apolipoprotein E OS=Homo sapiens GN=APOE PE=1 SV=1	988	File384_Scan7225	controllerType=0 controllerNumber=1 scan=7225	25.8872
01223:2	13	R.LGADM[+15.995]EDVC[+57.021]GR.L		C[+57], M[+16]	619.761	2	1238.51	1238.51	0	0.6	122	Specific	561.6	561.6	561.6	10.31	21	>sp|P02649|APOE_HUMAN Apolipoprotein E OS=Homo sapiens GN=APOE PE=1 SV=1	988	File384_Scan2933	controllerType=0 controllerNumber=1 scan=2933	16.074
04097:2	13	R.GEVQAM[+15.995]LGQSTEELR.V		M[+16]	832.402	2	1663.8	1663.8	0	0.9	138	Specific	397.99	378.45	378.45	8.17	21	>sp|P02649|APOE_HUMAN Apolipoprotein E OS=Homo sapiens GN=APOE PE=1 SV=1	988	File384_Scan6050	controllerType=0 controllerNumber=1 scan=6050	22.9631
04012:2	13	R.GEVQAM[+15.995]LGQSTEELR.V		M[+16]	832.402	2	1663.8	1663.8	0	0.7	138	Specific	694.33	545.24	545.24	13.4	21	>sp|P02649|APOE_HUMAN Apolipoprotein E OS=Homo sapiens GN=APOE PE=1 SV=1	988	File384_Scan5935	controllerType=0 controllerNumber=1 scan=5935	22.6711
02422:2	13	R.LAVYQAGAR.E			474.767	2	948.527	948.526	0	0.5	177	Specific	415.36	148.12	148.12	6.32	21	>sp|P02649|APOE_HUMAN Apolipoprotein E OS=Homo sapiens GN=APOE PE=1 SV=1	988	File384_Scan4190	controllerType=0 controllerNumber=1 scan=4190	18.7662
02306:2	13	R.LAVYQAGAR.E			474.767	2	948.526	948.526	0	-0.4	177	Specific	537.49	179.52	179.52	7.77	21	>sp|P02649|APOE_HUMAN Apolipoprotein E OS=Homo sapiens GN=APOE PE=1 SV=1	988	File384_Scan4070	controllerType=0 controllerNumber=1 scan=4070	18.4797
03686:2	13	R.LGPLVEQGR.V			484.78	2	968.553	968.552	0	0.3	199	Specific	469.06	299.6	299.6	7.39	21	>sp|P02649|APOE_HUMAN Apolipoprotein E OS=Homo sapiens GN=APOE PE=1 SV=1	988	File384_Scan5524	controllerType=0 controllerNumber=1 scan=5524	21.7164
03585:2	13	R.LGPLVEQGR.V			484.779	2	968.552	968.552	0	-0.9	199	Specific	531.73	308.99	308.99	8.18	21	>sp|P02649|APOE_HUMAN Apolipoprotein E OS=Homo sapiens GN=APOE PE=1 SV=1	988	File384_Scan5412	controllerType=0 controllerNumber=1 scan=5412	21.4793
04275:2	13	R.AATVGSLAGQPLQER.A			749.406	2	1497.8	1497.8	0	1.5	210	Specific	847.9	613.53	613.53	16.54	21	>sp|P02649|APOE_HUMAN Apolipoprotein E OS=Homo sapiens GN=APOE PE=1 SV=1	988	File384_Scan6294	controllerType=0 controllerNumber=1 scan=6294	23.5716
01183:2	13	R.AQAWGER.L			409.201	2	817.395	817.395	0	0	225	Specific	347.09	183.75	183.75	4.65	21	>sp|P02649|APOE_HUMAN Apolipoprotein E OS=Homo sapiens GN=APOE PE=1 SV=1	988	File384_Scan2891	controllerType=0 controllerNumber=1 scan=2891	15.985
00676:2	13	R.DRLDEVK.E			437.735	2	874.463	874.463	0	-0.1	245	Specific	549.1	5.73	5.73	2.41	21	>sp|P02649|APOE_HUMAN Apolipoprotein E OS=Homo sapiens GN=APOE PE=1 SV=1	988	File384_Scan2361	controllerType=0 controllerNumber=1 scan=2361	14.828
02046:2	13	R.LDEVKEQVAEVR.A			707.881	2	1414.76	1414.75	0	1	247	Specific	602.34	517.1	517.1	11.38	21	>sp|P02649|APOE_HUMAN Apolipoprotein E OS=Homo sapiens GN=APOE PE=1 SV=1	988	File384_Scan3798	controllerType=0 controllerNumber=1 scan=3798	17.8357
02037:3	13	R.LDEVKEQVAEVR.A			472.256	3	1414.75	1414.75	0	0.7	247	Specific	709.57	538.1	538.1	13.94	21	>sp|P02649|APOE_HUMAN Apolipoprotein E OS=Homo sapiens GN=APOE PE=1 SV=1	988	File384_Scan3789	controllerType=0 controllerNumber=1 scan=3789	17.8185
00699:2	13	K.EQVAEVR.A			415.722	2	830.437	830.437	0	0	252	Specific	427.88	68.13	68.13	4.19	21	>sp|P02649|APOE_HUMAN Apolipoprotein E OS=Homo sapiens GN=APOE PE=1 SV=1	988	File384_Scan2385	controllerType=0 controllerNumber=1 scan=2385	14.882
00984:3	13	R.AKLEEQAQQIR.L			438.577	3	1313.72	1313.72	0	-0.3	259	Specific	619.71	426.61	426.61	11.53	21	>sp|P02649|APOE_HUMAN Apolipoprotein E OS=Homo sapiens GN=APOE PE=1 SV=1	988	File384_Scan2683	controllerType=0 controllerNumber=1 scan=2683	15.5285
00983:2	13	R.AKLEEQAQQIR.L			657.362	2	1313.72	1313.72	0	0.3	259	Specific	780.05	489.75	489.75	14.2	21	>sp|P02649|APOE_HUMAN Apolipoprotein E OS=Homo sapiens GN=APOE PE=1 SV=1	988	File384_Scan2682	controllerType=0 controllerNumber=1 scan=2682	15.5245
00981:2	13	R.AKLEEQAQQIR.L			657.362	2	1313.72	1313.72	0	0.3	259	Specific	845.21	591.67	591.67	15.2	21	>sp|P02649|APOE_HUMAN Apolipoprotein E OS=Homo sapiens GN=APOE PE=1 SV=1	988	File384_Scan2680	controllerType=0 controllerNumber=1 scan=2680	15.5196
01055:2	13	K.LEEQAQQIR.L			557.796	2	1114.59	1114.59	0	0.2	261	Specific	640.3	397.32	397.32	12.47	21	>sp|P02649|APOE_HUMAN Apolipoprotein E OS=Homo sapiens GN=APOE PE=1 SV=1	988	File384_Scan2757	controllerType=0 controllerNumber=1 scan=2757	15.6936
02927:2	13	R.LQAEAFQAR.L			517.275	2	1033.54	1033.54	0	0.6	270	Specific	382.29	215.65	215.65	6.73	21	>sp|P02649|APOE_HUMAN Apolipoprotein E OS=Homo sapiens GN=APOE PE=1 SV=1	988	File384_Scan4718	controllerType=0 controllerNumber=1 scan=4718	19.9661
08764:2	13	K.SWFEPLVEDM[+15.995]QR.Q		M[+16]	776.86	2	1552.71	1552.71	0	2.1	281	Specific	244.06	133.08	133.08	2.89	21	>sp|P02649|APOE_HUMAN Apolipoprotein E OS=Homo sapiens GN=APOE PE=1 SV=1	988	File384_Scan11069	controllerType=0 controllerNumber=1 scan=11069	34.0908
08632:2	13	K.SWFEPLVEDM[+15.995]QR.Q		M[+16]	776.859	2	1552.71	1552.71	0	0.7	281	Specific	436.57	208.4	208.4	6.65	21	>sp|P02649|APOE_HUMAN Apolipoprotein E OS=Homo sapiens GN=APOE PE=1 SV=1	988	File384_Scan10930	controllerType=0 controllerNumber=1 scan=10930	33.8114
04453:2	13	R.QWAGLVEK.V			465.756	2	930.504	930.504	0	-0.2	293	Specific	279.02	91.22	91.22	2.27	21	>sp|P02649|APOE_HUMAN Apolipoprotein E OS=Homo sapiens GN=APOE PE=1 SV=1	988	File384_Scan6516	controllerType=0 controllerNumber=1 scan=6516	24.134
02582:2	13	K.VQAAVGTSAAPVPSDNH.-			810.902	2	1620.8	1620.8	0	-0.1	301	CRagged	718.06	584.9	584.9	14.45	21	>sp|P02649|APOE_HUMAN Apolipoprotein E OS=Homo sapiens GN=APOE PE=1 SV=1	988	File384_Scan4358	controllerType=0 controllerNumber=1 scan=4358	19.1281
05933:2	14	K.GSLGGGFSSGGFSGGSFSR.G			854.39	2	1707.77	1707.77	0	0.3	41	Specific	311.57	267.46	267.46	7.29	20	>sp|P13645|K1C10_HUMAN Keratin, type I cytoskeletal 10 OS=Homo sapiens GN=KRT10 PE=1 SV=6	12271	File384_Scan8092	controllerType=0 controllerNumber=1 scan=8092	27.9579
00521:2	14	K.VTM[+15.995]QNLNDR.L		M[+16]	553.767	2	1106.53	1106.53	0	0.5	148	Specific	375.1	259.89	259.89	7.11	20	>sp|P13645|K1C10_HUMAN Keratin, type I cytoskeletal 10 OS=Homo sapiens GN=KRT10 PE=1 SV=6	12271	File384_Scan2200	controllerType=0 controllerNumber=1 scan=2200	14.4412
02498:2	14	R.LASYLDK.V			405.223	2	809.439	809.44	0	-1.1	157	Specific	444.58	138.14	138.14	4.58	20	>sp|P13645|K1C10_HUMAN Keratin, type I cytoskeletal 10 OS=Homo sapiens GN=KRT10 PE=1 SV=6	12271	File384_Scan4270	controllerType=0 controllerNumber=1 scan=4270	18.9429
03187:2	14	R.ALEESNYELEGK.I			691.327	2	1381.65	1381.65	0	-1.2	166	Specific	630.13	425.05	425.05	12.15	20	>sp|P13645|K1C10_HUMAN Keratin, type I cytoskeletal 10 OS=Homo sapiens GN=KRT10 PE=1 SV=6	12271	File384_Scan4990	controllerType=0 controllerNumber=1 scan=4990	20.5776
11145:3	14	K.NQILNLTTDNANILLQIDNAR.L			789.76	3	2367.27	2367.26	0	1.1	208	Specific	485.23	485.23	485.23	10.83	20	>sp|P13645|K1C10_HUMAN Keratin, type I cytoskeletal 10 OS=Homo sapiens GN=KRT10 PE=1 SV=6	12271	File384_Scan13584	controllerType=0 controllerNumber=1 scan=13584	39.2986
11147:2	14	K.NQILNLTTDNANILLQIDNAR.L			1184.14	2	2367.26	2367.26	0	0.8	208	Specific	514.39	514.39	514.39	10.77	20	>sp|P13645|K1C10_HUMAN Keratin, type I cytoskeletal 10 OS=Homo sapiens GN=KRT10 PE=1 SV=6	12271	File384_Scan13586	controllerType=0 controllerNumber=1 scan=13586	39.3017
02800:2	14	R.LAADDFR.L			404.203	2	807.399	807.399	0	0	229	Specific	336.68	146.86	146.86	4.62	20	>sp|P13645|K1C10_HUMAN Keratin, type I cytoskeletal 10 OS=Homo sapiens GN=KRT10 PE=1 SV=6	12271	File384_Scan4586	controllerType=0 controllerNumber=1 scan=4586	19.6526
02982:2	14	R.LKYENEVALR.Q			617.843	2	1234.68	1234.68	0	0.5	236	Specific	321.18	210.05	210.05	4.93	20	>sp|P13645|K1C10_HUMAN Keratin, type I cytoskeletal 10 OS=Homo sapiens GN=KRT10 PE=1 SV=6	12271	File384_Scan4775	controllerType=0 controllerNumber=1 scan=4775	20.0909
02934:3	14	R.LKYENEVALR.Q			412.231	3	1234.68	1234.68	0	0	236	Specific	467.73	266.86	266.86	7.21	20	>sp|P13645|K1C10_HUMAN Keratin, type I cytoskeletal 10 OS=Homo sapiens GN=KRT10 PE=1 SV=6	12271	File384_Scan4725	controllerType=0 controllerNumber=1 scan=4725	19.979
02436:2	14	K.YENEVALR.Q			497.254	2	993.5	993.5	0	0.2	238	Specific	406.69	165.48	165.48	6.09	20	>sp|P13645|K1C10_HUMAN Keratin, type I cytoskeletal 10 OS=Homo sapiens GN=KRT10 PE=1 SV=6	12271	File384_Scan4205	controllerType=0 controllerNumber=1 scan=4205	18.8084
03372:3	14	R.QSVEADINGLRR.V			453.244	3	1357.72	1357.72	0	0.2	246	Specific	429.11	275.02	275.02	6.67	20	>sp|P13645|K1C10_HUMAN Keratin, type I cytoskeletal 10 OS=Homo sapiens GN=KRT10 PE=1 SV=6	12271	File384_Scan5183	controllerType=0 controllerNumber=1 scan=5183	20.973
05593:2	14	R.VLDELTLTK.A			516.303	2	1031.6	1031.6	0	0.6	258	Specific	477.07	182.83	182.83	7.66	20	>sp|P13645|K1C10_HUMAN Keratin, type I cytoskeletal 10 OS=Homo sapiens GN=KRT10 PE=1 SV=6	12271	File384_Scan7726	controllerType=0 controllerNumber=1 scan=7726	27.0614
09389:3	14	R.NVSTGDVNVEM[+15.995]NAAPGVDLTQLLNNM[+15.995]R.S		M[+16]*2	968.799	3	2904.38	2904.38	0	-0.4	296	Specific	469.41	469.41	469.41	10.14	20	>sp|P13645|K1C10_HUMAN Keratin, type I cytoskeletal 10 OS=Homo sapiens GN=KRT10 PE=1 SV=6	12271	File384_Scan11727	controllerType=0 controllerNumber=1 scan=11727	35.4853
01710:2	14	R.SQYEQLAEQNR.K			683.324	2	1365.64	1365.64	0	0.4	323	Specific	674.79	591.49	591.49	13.42	20	>sp|P13645|K1C10_HUMAN Keratin, type I cytoskeletal 10 OS=Homo sapiens GN=KRT10 PE=1 SV=6	12271	File384_Scan3446	controllerType=0 controllerNumber=1 scan=3446	17.1074
00989:3	14	R.SQYEQLAEQNRK.D			498.583	3	1493.73	1493.73	0	0	323	Specific	717.68	647.23	647.23	13.72	20	>sp|P13645|K1C10_HUMAN Keratin, type I cytoskeletal 10 OS=Homo sapiens GN=KRT10 PE=1 SV=6	12271	File384_Scan2688	controllerType=0 controllerNumber=1 scan=2688	15.5393
07551:2	14	K.ELTTEIDNNIEQISSYK.S			998.989	2	1996.97	1996.97	0	-0.5	346	Specific	622.76	527.1	527.1	12.45	20	>sp|P13645|K1C10_HUMAN Keratin, type I cytoskeletal 10 OS=Homo sapiens GN=KRT10 PE=1 SV=6	12271	File384_Scan9789	controllerType=0 controllerNumber=1 scan=9789	31.5154
02598:2	14	K.SEITELR.R			424.23	2	847.452	847.452	0	0.1	363	Specific	302.91	120.32	120.32	4.77	20	>sp|P13645|K1C10_HUMAN Keratin, type I cytoskeletal 10 OS=Homo sapiens GN=KRT10 PE=1 SV=6	12271	File384_Scan4374	controllerType=0 controllerNumber=1 scan=4374	19.1602
01290:2	14	K.SEITELRR.N			502.281	2	1003.55	1003.55	0	0.6	363	Specific	445.81	43.85	43.85	2.26	20	>sp|P13645|K1C10_HUMAN Keratin, type I cytoskeletal 10 OS=Homo sapiens GN=KRT10 PE=1 SV=6	12271	File384_Scan3003	controllerType=0 controllerNumber=1 scan=3003	16.2095
04429:2	14	K.QSLEASLAETEGR.Y			695.845	2	1390.68	1390.68	0	0.9	387	Specific	678.93	486.25	486.25	13.42	20	>sp|P13645|K1C10_HUMAN Keratin, type I cytoskeletal 10 OS=Homo sapiens GN=KRT10 PE=1 SV=6	12271	File384_Scan6489	controllerType=0 controllerNumber=1 scan=6489	24.0617
07080:2	14	R.AETEC[+57.021]QNTEYQQLLDIK.I		C[+57]	1041.99	2	2082.97	2082.96	0	0.3	423	Specific	432.05	432.05	432.05	9.75	20	>sp|P13645|K1C10_HUMAN Keratin, type I cytoskeletal 10 OS=Homo sapiens GN=KRT10 PE=1 SV=6	12271	File384_Scan9293	controllerType=0 controllerNumber=1 scan=9293	30.4936
03982:3	14	K.IRLENEIQTYR.S			478.928	3	1434.77	1434.77	0	-0.1	440	Specific	334.8	220.06	220.06	5.21	20	>sp|P13645|K1C10_HUMAN Keratin, type I cytoskeletal 10 OS=Homo sapiens GN=KRT10 PE=1 SV=6	12271	File384_Scan5901	controllerType=0 controllerNumber=1 scan=5901	22.5934
02648:2	14	R.LENEIQTYR.S			583.295	2	1165.58	1165.58	0	-1.9	442	Specific	498.76	275.41	275.41	6.63	20	>sp|P13645|K1C10_HUMAN Keratin, type I cytoskeletal 10 OS=Homo sapiens GN=KRT10 PE=1 SV=6	12271	File384_Scan4427	controllerType=0 controllerNumber=1 scan=4427	19.2696
02059:2	14	R.SLLEGEGSSGGGGR.G			631.803	2	1262.6	1262.6	0	0.5	451	Specific	546.49	436.04	436.04	10.14	20	>sp|P13645|K1C10_HUMAN Keratin, type I cytoskeletal 10 OS=Homo sapiens GN=KRT10 PE=1 SV=6	12271	File384_Scan3812	controllerType=0 controllerNumber=1 scan=3812	17.8718
07087:2	15	K.SSSNEEVM[+15.995]FLTVQVK.G		M[+16]	857.423	2	1713.84	1713.84	0	0.8	94	Specific	109.61	109.61	109.61	1.8	29	>sp|P01023|A2MG_HUMAN Alpha-2-macroglobulin OS=Homo sapiens GN=A2M PE=1 SV=3	381	File384_Scan9300	controllerType=0 controllerNumber=1 scan=9300	30.5051
00948:2	15	K.GPTQEFK.K			403.706	2	806.404	806.404	0	-0.3	109	Specific	277.75	112.76	112.76	3.55	29	>sp|P01023|A2MG_HUMAN Alpha-2-macroglobulin OS=Homo sapiens GN=A2M PE=1 SV=3	381	File384_Scan2645	controllerType=0 controllerNumber=1 scan=2645	15.4502
05513:2	15	K.NEDSLVFVQTDK.S			697.844	2	1394.68	1394.68	0	0.8	124	Specific	582.79	431.62	431.62	11.61	29	>sp|P01023|A2MG_HUMAN Alpha-2-macroglobulin OS=Homo sapiens GN=A2M PE=1 SV=3	381	File384_Scan7640	controllerType=0 controllerNumber=1 scan=7640	26.8634
09329:2	15	K.QFSFPLSSEPFQGSYK.V			924.944	2	1848.88	1848.88	0	0.8	189	Specific	569.47	524.94	524.94	10.56	29	>sp|P01023|A2MG_HUMAN Alpha-2-macroglobulin OS=Homo sapiens GN=A2M PE=1 SV=3	381	File384_Scan11664	controllerType=0 controllerNumber=1 scan=11664	35.3551
08124:3	15	R.TEHPFTVEEFVLPK.F			558.291	3	1672.86	1672.86	0	0.5	215	Specific	717.03	607.21	607.21	14.42	29	>sp|P01023|A2MG_HUMAN Alpha-2-macroglobulin OS=Homo sapiens GN=A2M PE=1 SV=3	381	File384_Scan10390	controllerType=0 controllerNumber=1 scan=10390	32.7428
05676:2	15	K.FEVQVTVPK.I			523.798	2	1046.59	1046.59	0	0.1	229	Specific	379.34	272.6	272.6	6.81	29	>sp|P01023|A2MG_HUMAN Alpha-2-macroglobulin OS=Homo sapiens GN=A2M PE=1 SV=3	381	File384_Scan7818	controllerType=0 controllerNumber=1 scan=7818	27.288
08716:2	15	R.QGIPFFGQVR.L			574.814	2	1148.62	1148.62	0	-0.2	361	Specific	443.18	192.6	192.6	6.44	29	>sp|P01023|A2MG_HUMAN Alpha-2-macroglobulin OS=Homo sapiens GN=A2M PE=1 SV=3	381	File384_Scan11018	controllerType=0 controllerNumber=1 scan=11018	33.9902
01522:2	15	R.TGTHGLLVK.Q			463.277	2	925.547	925.547	0	0.7	508	Specific	110.61	39.31	39.31	0.48	29	>sp|P01023|A2MG_HUMAN Alpha-2-macroglobulin OS=Homo sapiens GN=A2M PE=1 SV=3	381	File384_Scan3248	controllerType=0 controllerNumber=1 scan=3248	16.7022
01582:2	15	K.SDIAPVAR.L			414.733	2	828.458	828.457	0	0.3	532	Specific	316.96	136.81	136.81	4.77	29	>sp|P01023|A2MG_HUMAN Alpha-2-macroglobulin OS=Homo sapiens GN=A2M PE=1 SV=3	381	File384_Scan3311	controllerType=0 controllerNumber=1 scan=3311	16.8253
11450:2	15	R.LLIYAVLPTGDVIGDSAK.Y			923.02	2	1845.03	1845.04	0	-1.9	540	Specific	487.69	470.59	470.59	10.11	29	>sp|P01023|A2MG_HUMAN Alpha-2-macroglobulin OS=Homo sapiens GN=A2M PE=1 SV=3	381	File384_Scan13908	controllerType=0 controllerNumber=1 scan=13908	40.0343
03131:2	15	K.YDVENC[+57.021]LANK.V		C[+57]	613.28	2	1225.55	1225.55	0	0.6	558	Specific	187.86	93.66	93.66	1.61	29	>sp|P01023|A2MG_HUMAN Alpha-2-macroglobulin OS=Homo sapiens GN=A2M PE=1 SV=3	381	File384_Scan4931	controllerType=0 controllerNumber=1 scan=4931	20.4516
09491:3	15	R.AVDQSVLLM[+15.995]KPDAELSASSVYNLLPEK.D		M[+16]	978.512	3	2933.52	2933.52	0	1.4	599	Specific	125.32	125.32	125.32	3.66	29	>sp|P01023|A2MG_HUMAN Alpha-2-macroglobulin OS=Homo sapiens GN=A2M PE=1 SV=3	381	File384_Scan11834	controllerType=0 controllerNumber=1 scan=11834	35.7233
07295:2	15	K.DM[+15.995]YSFLEDM[+15.995]GLK.A		M[+16]*2	740.823	2	1480.64	1480.63	0	3.2	665	Specific	308.75	270.31	270.31	5.66	29	>sp|P01023|A2MG_HUMAN Alpha-2-macroglobulin OS=Homo sapiens GN=A2M PE=1 SV=3	381	File384_Scan9518	controllerType=0 controllerNumber=1 scan=9518	30.9578
04027:2	15	R.VGFYESDVM[+15.995]GR.G		M[+16]	638.288	2	1275.57	1275.57	0	1.1	705	Specific	319.1	166.38	166.38	5.25	29	>sp|P01023|A2MG_HUMAN Alpha-2-macroglobulin OS=Homo sapiens GN=A2M PE=1 SV=3	381	File384_Scan5952	controllerType=0 controllerNumber=1 scan=5952	22.711
06776:2	15	K.ATVLNYLPK.C			509.801	2	1018.59	1018.59	0	1.2	812	Specific	451.6	110.94	110.94	6.31	29	>sp|P01023|A2MG_HUMAN Alpha-2-macroglobulin OS=Homo sapiens GN=A2M PE=1 SV=3	381	File384_Scan8974	controllerType=0 controllerNumber=1 scan=8974	29.8264
09880:2	15	R.VSVQLEASPAFLAVPVEK.E			942.528	2	1884.05	1884.05	0	0.7	824	Specific	350.31	350.31	350.31	8.61	29	>sp|P01023|A2MG_HUMAN Alpha-2-macroglobulin OS=Homo sapiens GN=A2M PE=1 SV=3	381	File384_Scan12249	controllerType=0 controllerNumber=1 scan=12249	36.5894
07694:3	15	K.DTVIKPLLVEPEGLEK.E			594.009	3	1780.01	1780.01	0	0.6	897	Specific	599.24	599.24	599.24	11.67	29	>sp|P01023|A2MG_HUMAN Alpha-2-macroglobulin OS=Homo sapiens GN=A2M PE=1 SV=3	381	File384_Scan9939	controllerType=0 controllerNumber=1 scan=9939	31.818
03611:2	15	K.LPPNVVEESAR.A			605.825	2	1210.64	1210.64	0	0.1	935	Specific	308.23	178.68	178.68	5.94	29	>sp|P01023|A2MG_HUMAN Alpha-2-macroglobulin OS=Homo sapiens GN=A2M PE=1 SV=3	381	File384_Scan5439	controllerType=0 controllerNumber=1 scan=5439	21.5338
03463:2	15	K.LPPNVVEESAR.A			605.826	2	1210.64	1210.64	0	1	935	Specific	449.55	237.88	237.88	6.89	29	>sp|P01023|A2MG_HUMAN Alpha-2-macroglobulin OS=Homo sapiens GN=A2M PE=1 SV=3	381	File384_Scan5278	controllerType=0 controllerNumber=1 scan=5278	21.1947
04366:2	15	K.AIGYLNTGYQR.Q			628.325	2	1255.64	1255.64	0	0.3	1004	Specific	297.39	153.62	153.62	5.1	29	>sp|P01023|A2MG_HUMAN Alpha-2-macroglobulin OS=Homo sapiens GN=A2M PE=1 SV=3	381	File384_Scan6413	controllerType=0 controllerNumber=1 scan=6413	23.8713
10509:2	15	K.ALLAYAFALAGNQDK.R			783.42	2	1565.83	1565.83	0	1	1148	Specific	308.87	290.15	290.15	7.32	29	>sp|P01023|A2MG_HUMAN Alpha-2-macroglobulin OS=Homo sapiens GN=A2M PE=1 SV=3	381	File384_Scan12915	controllerType=0 controllerNumber=1 scan=12915	37.9634
00952:2	15	K.SLNEEAVK.K			445.235	2	889.463	889.462	0	0	1169	Specific	143.3	45.62	45.62	1.08	29	>sp|P01023|A2MG_HUMAN Alpha-2-macroglobulin OS=Homo sapiens GN=A2M PE=1 SV=3	381	File384_Scan2649	controllerType=0 controllerNumber=1 scan=2649	15.4576
00435:2	15	K.SLNEEAVKK.D			509.283	2	1017.56	1017.56	0	0.3	1169	Specific	184.09	9.78	9.78	0.4	29	>sp|P01023|A2MG_HUMAN Alpha-2-macroglobulin OS=Homo sapiens GN=A2M PE=1 SV=3	381	File384_Scan2110	controllerType=0 controllerNumber=1 scan=2110	14.2319
06074:3	15	K.QQNAQGGFSSTQDTVVALHALSK.Y			796.404	3	2387.2	2387.2	0	0.5	1241	Specific	265.4	265.4	265.4	6.91	29	>sp|P01023|A2MG_HUMAN Alpha-2-macroglobulin OS=Homo sapiens GN=A2M PE=1 SV=3	381	File384_Scan8239	controllerType=0 controllerNumber=1 scan=8239	28.2867
02232:2	15	K.YGAATFTR.T			443.725	2	886.442	886.442	0	0.8	1264	Specific	387.07	55.3	55.3	3.52	29	>sp|P01023|A2MG_HUMAN Alpha-2-macroglobulin OS=Homo sapiens GN=A2M PE=1 SV=3	381	File384_Scan3992	controllerType=0 controllerNumber=1 scan=3992	18.2809
03395:2	15	K.AAQVTIQSSGTFSSK.F			756.389	2	1511.77	1511.77	0	0.5	1275	Specific	321.97	321.97	321.97	7.61	29	>sp|P01023|A2MG_HUMAN Alpha-2-macroglobulin OS=Homo sapiens GN=A2M PE=1 SV=3	381	File384_Scan5207	controllerType=0 controllerNumber=1 scan=5207	21.023
00965:2	15	K.FQVDNNNR.L			503.739	2	1006.47	1006.47	0	0.1	1290	Specific	372.4	227.69	227.69	6.13	29	>sp|P01023|A2MG_HUMAN Alpha-2-macroglobulin OS=Homo sapiens GN=A2M PE=1 SV=3	381	File384_Scan2663	controllerType=0 controllerNumber=1 scan=2663	15.4858
10357:2	15	R.LLLQQVSLPELPGEYSM[+15.995]K.V		M[+16]	1031.05	2	2061.09	2061.09	0	-2.1	1298	Specific	239.33	239.33	239.33	6.62	29	>sp|P01023|A2MG_HUMAN Alpha-2-macroglobulin OS=Homo sapiens GN=A2M PE=1 SV=3	381	File384_Scan12755	controllerType=0 controllerNumber=1 scan=12755	37.6382
02511:2	15	R.SASNM[+15.995]AIVDVK.M		M[+16]	575.792	2	1150.58	1150.58	0	-1.1	1374	Specific	391.17	232.67	232.67	6.37	29	>sp|P01023|A2MG_HUMAN Alpha-2-macroglobulin OS=Homo sapiens GN=A2M PE=1 SV=3	381	File384_Scan4283	controllerType=0 controllerNumber=1 scan=4283	18.967
05673:3	15	K.M[+15.995]VSGFIPLKPTVK.M		M[+16]	478.279	3	1432.82	1432.82	0	-0.2	1385	Specific	246.04	246.04	246.04	5.09	29	>sp|P01023|A2MG_HUMAN Alpha-2-macroglobulin OS=Homo sapiens GN=A2M PE=1 SV=3	381	File384_Scan7815	controllerType=0 controllerNumber=1 scan=7815	27.2799
07624:2	16	R.NFPPSQDASGDLYTTSSQLTLPATQC[+57.021]PDGK.S		C[+57]	1598.73	2	3196.46	3196.47	0	-4.2	52	Specific	103.08	103.08	103.08	2.88	12	>tr|A0A0G2JMB2|A0A0G2JMB2_HUMAN Immunoglobulin heavy constant alpha 2 (Fragment) OS=Homo sapiens GN=IGHA2 PE=1 SV=1	66180	File384_Scan9865	controllerType=0 controllerNumber=1 scan=9865	31.6664
07400:4	16	R.NFPPSQDASGDLYTTSSQLTLPATQC[+57.021]PDGK.S		C[+57]	799.873	4	3196.47	3196.47	0	-0.9	52	Specific	312.05	312.05	312.05	6.68	12	>tr|A0A0G2JMB2|A0A0G2JMB2_HUMAN Immunoglobulin heavy constant alpha 2 (Fragment) OS=Homo sapiens GN=IGHA2 PE=1 SV=1	66180	File384_Scan9628	controllerType=0 controllerNumber=1 scan=9628	31.1781
07872:3	16	R.NFPPSQDASGDLYTTSSQLTLPATQC[+57.021]PDGK.S		C[+57]	1066.16	3	3196.48	3196.47	0	1.6	52	Specific	447.41	447.41	447.41	10.83	12	>tr|A0A0G2JMB2|A0A0G2JMB2_HUMAN Immunoglobulin heavy constant alpha 2 (Fragment) OS=Homo sapiens GN=IGHA2 PE=1 SV=1	66180	File384_Scan10126	controllerType=0 controllerNumber=1 scan=10126	32.2008
07147:3	16	R.NFPPSQDASGDLYTTSSQLTLPATQC[+57.021]PDGK.S		C[+57]	1066.16	3	3196.47	3196.47	0	-0.1	52	Specific	478.86	478.86	478.86	10.57	12	>tr|A0A0G2JMB2|A0A0G2JMB2_HUMAN Immunoglobulin heavy constant alpha 2 (Fragment) OS=Homo sapiens GN=IGHA2 PE=1 SV=1	66180	File384_Scan9363	controllerType=0 controllerNumber=1 scan=9363	30.6316
07768:3	16	R.NFPPSQDASGDLYTTSSQLTLPATQC[+57.021]PDGK.S		C[+57]	1066.16	3	3196.47	3196.47	0	-2.2	52	Specific	542.5	542.5	542.5	10.4	12	>tr|A0A0G2JMB2|A0A0G2JMB2_HUMAN Immunoglobulin heavy constant alpha 2 (Fragment) OS=Homo sapiens GN=IGHA2 PE=1 SV=1	66180	File384_Scan10017	controllerType=0 controllerNumber=1 scan=10017	31.9745
07240:3	16	R.NFPPSQDASGDLYTTSSQLTLPATQC[+57.021]PDGK.S		C[+57]	1066.16	3	3196.48	3196.47	0	0.7	52	Specific	599.07	584.49	584.49	11.82	12	>tr|A0A0G2JMB2|A0A0G2JMB2_HUMAN Immunoglobulin heavy constant alpha 2 (Fragment) OS=Homo sapiens GN=IGHA2 PE=1 SV=1	66180	File384_Scan9461	controllerType=0 controllerNumber=1 scan=9461	30.8409
07545:3	16	R.NFPPSQDASGDLYTTSSQLTLPATQC[+57.021]PDGK.S		C[+57]	1066.16	3	3196.48	3196.47	0	0.8	52	Specific	620.15	620.15	620.15	13.5	12	>tr|A0A0G2JMB2|A0A0G2JMB2_HUMAN Immunoglobulin heavy constant alpha 2 (Fragment) OS=Homo sapiens GN=IGHA2 PE=1 SV=1	66180	File384_Scan9783	controllerType=0 controllerNumber=1 scan=9783	31.5062
07647:3	16	R.NFPPSQDASGDLYTTSSQLTLPATQC[+57.021]PDGK.S		C[+57]	1066.16	3	3196.48	3196.47	0	1.2	52	Specific	631.55	578.32	578.32	12.96	12	>tr|A0A0G2JMB2|A0A0G2JMB2_HUMAN Immunoglobulin heavy constant alpha 2 (Fragment) OS=Homo sapiens GN=IGHA2 PE=1 SV=1	66180	File384_Scan9890	controllerType=0 controllerNumber=1 scan=9890	31.7194
[truncated: 1,160 more rows]

## Sheet: Table S1 B
Query #:z	Protein Rank	Peptide < ProteinMetrics Confidential >	Glycans NHFAGNa	Modification Type(s)	Observed m/z	z	Observed (M+H)	Calc. mass (M+H)	Off-by-x error	Mass error (ppm)	Starting position	Cleavage	Score	Delta	Delta Mod	|Log Prob|	# of unique peptides	Protein Name	Protein DB number	Comment	Scan #	Scan Time
[truncated: 2,583 more rows]

[truncated: 12 more sheets: Table S1 C, Table S1 D, Table S1 E, Table S2 A, Table S2 B, Table S2 C, Table S2 D, Table S2 E, Table S3, Table S4, Table S5, Table S6]
