# Supplementary material for: Semiautomated glycoproteomics data analysis workflow for maximized glycopeptide identification and reliable quantification
Source: Beilstein J Org Chem. 2020 Dec 11;16:3038–51. doi: 10.3762/bjoc.16.253 (PMC7736696; doi:10.3762/bjoc.16.253)
Supplement: File 4 — LaCyTools analyte list. [file Beilstein_J_Org_Chem-16-3038-s004.ref]

# Peak	RT	Mass Window	Time Window	Min Charge	Max	Calibrant
IgGI1H6N4F1	870		15	2	4
IgGI1H3N5	870		15	2	4
IgGI1F1H5N4	870		15	2	4
IgGI1F1H4N3	870		15	2	4
IgGI1F1H4N4	870		15	2	4
IgGI1H5N4	870		15	2	4
IgGI1H4N3	870		15	2	4
IgGI1F1H5N5	870		15	2	4
IgGI1F1H3N3	870		15	2	4
IgGI1H4N4	870		15	2	4
IgGI1H3N3	870		15	2	4
IgGI1F1H3N4	870		15	2	4
IgGI1F1H4N5	870		15	2	4
IgGI1F1H3N5	870		15	2	4
IgGI1H4N5	870		7	2	4
IgGI1F1H2N3	870		15	2	4
IgGI1H3N4	870		15	2	4
IgGI1F1H5N4S1	895		15	2	4
IgGI1H5N4S1	895		15	2	4
IgGI1F1H4N4S1	895		15	2	4
IgGI1F1H4N5S1	895		15	2	4
IgGI1F1H5N4S2	925		15	2	4
IgGIV1H2N3F1	942		15	2	4
IgGIV1H4N3F1	942		15	2	4
IgGIV1F1H5N4	942		15	2	4
IgGIV1F1H5N5	942		15	2	4
IgGIV1F1H4N4	942		15	2	4
IgGIV1F1H3N3	942		15	2	4
IgGIV1F1H3N4	942		15	2	4
IgGIV1F1H3N5	942		15	2	4
IgGIV1F1H5N4S1	986		15	2	4
IgGII1H5N4	1050		15	2	4
TPL1F2H5N5	1050		7	2	4
TPL1F1H5N4	1067		15	2	4
IgGII1H5N5	1067		15	2	4
TPL1F1H6N5	1067		15	2	4
TPL1H5N5	1067		15	2	4
TPL1F1H3N4	1067		15	2	4
TPL1F1H4N5	1067		15	2	4
TPL1F1H5N5	1067		15	2	4
TPL1F1H3N5	1090		15	2	4
IgGII1F1H5N4	1090		15	2	4
IgGII1F1H5N5	1090		15	2	4
IgGII1F1H4N5	1090		15	2	4
IgGII1H3N3F1	1103		15	2	4
IgGII1H2N4F1	1103		7	2	4
IgGII1H4N4	1103		15	2	4
IgGII1F1H4N4	1103		15	2	4
IgGII1F1H3N4	1103		15	2	4
TPL1F1H4N4	1067		15	2	4
IgGII1F1H3N5	1103		15	2	4
IgGII1H3N4	1122		15	2	4
IgGII1F1H2N3	1122		15	2	4
IgGII1F1H4N3	1090		15	2	4
TPL1F2H5N5S1	1136		15	2	4
TPL1F1H6N4S1	1150		15	2	4
TPL1F2H5N4S1	1150		15	2	4
TPL1F1H6N5S1	1150		15	2	4
IgGII1H5N4S1	1150		15	2	4
TPL1F1H5N4S1	1150		15	2	4
TPL1F1H5N5S1	1163		15	2	4
IgGII1H5N5S1	1163		15	2	4
IgGII1H4N5S1	1163		15	2	4
TPL1F1H4N5S1	1163		15	2	4
TPL1H5N4S1	1163		15	2	4
TPL1H4N4F1S1	1178		15	2	4
IgGII1F1H5N5S1	1178		15	2	4
IgGII1F1H5N4S1	1178		15	2	4
IgGII1F1H4N4S1	1195		15	2	4
IgGII1H5N4S2	1253		15	2	4
TPL1F1H5N4S2	1253		15	2	4
IgGII1H5N5S2	1253		15	2	4
ENI1F1H5N4S1	1253		15	2	4
ENI1H5N3S1	1270		15	2	4
ENI1H5N4S1	1253		15	2	4
ENI1F1H5N3S1	1270		15	2	4
TPL1F1H5N5S2	1270		15	2	4
ENI1F1H5N4S2	1328		15	2	4
ENI1H5N4S2	1328		15	2	4
IIV1F1H5N4S1	1670		15	2	4
IIV1F1H5N3S1	1670		15	2	4
IIV1F1H4N3S1	1670		15	2	4
IIV1F1H5N4S2	1738		15	2	4
IIV1H5N4S2	1738		15	2	4
