# Supplementary material for: Semiautomated glycoproteomics data analysis workflow for maximized glycopeptide identification and reliable quantification
Source: Beilstein J Org Chem. 2020 Dec 11;16:3038–51. doi: 10.3762/bjoc.16.253 (PMC7736696; doi:10.3762/bjoc.16.253)
Supplement: File 5 — Analyte search list. [file Beilstein_J_Org_Chem-16-3038-s005.csv]

difference	max_rt	weight	color	cluster	cluster_min_rt	glymod_HexNAc	glymod_Fuc	glymod_Hex	glymod_NeuAc
162.05282	30	1	yellow	0	0	0	0	1	0
203.07937	30	1	blue	0	0	1	0	0	0
365.13219	30	1	green	0	0	1	0	1	0
146.05791	20	1	red	0	0	0	1	0	0
291.0954	120	1	pink	0	0	0	0	0	1
